# Supplementary material
Source: publisher figshare collection journal article supplement (https://acs.figshare.com/ndownloader/files/5971995)
Supplement: Supplementary file 1 [file 5971995]

data_global
_audit_creation_date                               2016-03-04
_audit_creation_method                            'by CrystalStructure 4.1'
_audit_update_record                               ?

#==============================================================================
# PROCESSING SUMMARY (IUCr Office Use Only)

_journal_date_recd_electronic                      ?
_journal_date_from_coeditor                        ?
_journal_date_accepted                             ?
_journal_coeditor_code                             ?

#==============================================================================
# SUBMISSION DETAILS

_publ_contact_author_name                         'ENTER NAME'
_publ_contact_author_email                        'ENTER EMAIL ADDRESS'
_publ_contact_author_fax                          'ENTER FAX NUMBER'
_publ_contact_author_phone                        'ENTER PHONE NUMBER'
_publ_contact_letter
;
    ENTER TEXT OF LETTER
;
_publ_requested_journal                           'ENTER JOURNAL NAME HERE'
_publ_requested_category
                                               'CHOOSE FI FM FO CI CM CO or AD'
_publ_requested_coeditor_name                      ?

#==============================================================================
# TITLE AND AUTHOR LIST

_publ_section_title
;
    ENTER SECTION TITLE
;
_publ_section_title_footnote
;
    ENTER FOOTNOTE TO TITLE OF PAPER
;
loop_
_publ_author_name
_publ_author_footnote
_publ_author_address
' FIRST AUTHORS NAME '
;
  FIRST AUTHORS FOOTNOTES
;
;
  FIRST AUTHORS ADDRESS
;
_publ_section_synopsis
;
    ENTER SYNOPSIS
;

#==============================================================================
# TEXT

_publ_section_abstract
;
    ENTER ABSTRACT
;
_publ_section_comment
;
    ENTER TEXT
;
_publ_section_references
;
    ENTER OTHER REFERENCES

    Rigaku (2014). CrystalStructure. Version 4.1. 
    Rigaku Corporation, Tokyo, Japan.

    Burla, M. C., Caliandro, R., Camalli, M., Carrozzini, B., 
    Cascarano, G. L., Giacovazzo, C., Mallamo, M., Mazzone, A., 
    Polidori, G. and Spagna, R. 
    (2012). J. Appl. Cryst. 45, 357-361.
    SIR2011

    Rigaku (1995). ABSCOR. 
    Rigaku Corporation, Tokyo, Japan.

;
_publ_section_figure_captions
;
    ENTER FIGURE CAPTIONS
;
_publ_section_exptl_prep
;
    ENTER COMPOUND PREPARATION DETAILS
;
_publ_section_exptl_refinement
;
    ENTER SPECIAL DETAILS OF THE REFINEMENT
;

#==============================================================================
benzyl-linked tris-thymine

#==============================================================================
# CHEMICAL DATA

_chemical_formula_sum                             'C38 H48 N6 O13'
_chemical_formula_moiety                          'C36 H42 N6 O12, C2 H6 O'
_chemical_formula_weight                           796.83
_chemical_melting_point                            ?

#==============================================================================
# CRYSTAL DATA
_space_group_crystal_system                        monoclinic
_space_group_name_H-M_alt                         'C 1 2/c 1'
_space_group_name_Hall                            '-C 2yc'
_space_group_IT_number                             15
loop_
_symmetry_equiv_pos_site_id
_space_group_symop_operation_xyz
1   '+X,+Y,+Z'
2   '-X,+Y,1/2-Z'
3   '-X,-Y,-Z'
4   '+X,-Y,1/2+Z'
5   '1/2+X,1/2+Y,+Z'
6   '1/2-X,1/2+Y,1/2-Z'
7   '1/2-X,1/2-Y,-Z'
8   '1/2+X,1/2-Y,1/2+Z'
#------------------------------------------------------------------------------
_cell_length_a                                     41.6712(9)
_cell_length_b                                     9.02761(18)
_cell_length_c                                     26.1878(5)
_cell_angle_alpha                                  90.0000
_cell_angle_beta                                   128.2466(9)
_cell_angle_gamma                                  90.0000
_cell_volume                                       7737.0(3)
_cell_formula_units_Z                              8
_cell_measurement_reflns_used                      30046
_cell_measurement_theta_min                        3.38
_cell_measurement_theta_max                        68.28
_cell_measurement_temperature                      173
#------------------------------------------------------------------------------
_exptl_crystal_description                         platelet
_exptl_crystal_colour                              colorless
_exptl_crystal_size_max                            0.650
_exptl_crystal_size_mid                            0.650
_exptl_crystal_size_min                            0.180
_exptl_crystal_density_diffrn                      1.368
_exptl_crystal_density_meas                        ?
_exptl_crystal_density_method                     'not measured'
_exptl_crystal_F_000                               3168.00
_exptl_absorpt_coefficient_mu                      0.872
_exptl_absorpt_correction_type                     multi-scan
_exptl_absorpt_process_details                    'ABSCOR (Rigaku, 1995)'
_exptl_absorpt_correction_T_min                    0.725
_exptl_absorpt_correction_T_max                    0.862

#==============================================================================
# EXPERIMENTAL DATA

_diffrn_ambient_temperature                        173
_diffrn_radiation_type                            'Cu K\a'
_diffrn_radiation_wavelength                       1.54187
_diffrn_measurement_device_type                   'Rigaku R-AXIS RAPID'
_diffrn_measurement_method                         \w
_diffrn_detector_area_resol_mean                   10.000
_diffrn_reflns_number                              43628
_diffrn_reflns_av_R_equivalents                    0.0546
_diffrn_reflns_theta_max                           68.249
_diffrn_reflns_theta_min                           3.376
_diffrn_reflns_theta_full                          67.687
_diffrn_measured_fraction_theta_max                0.986
_diffrn_measured_fraction_theta_full               0.987
_diffrn_reflns_Laue_measured_fraction_max          0.986
_diffrn_reflns_Laue_measured_fraction_full         0.987
_diffrn_reflns_point_group_measured_fraction_max   0.986
_diffrn_reflns_point_group_measured_fraction_full  0.987
_diffrn_reflns_limit_h_min                        -50
_diffrn_reflns_limit_h_max                         48
_diffrn_reflns_limit_k_min                        -10
_diffrn_reflns_limit_k_max                         10
_diffrn_reflns_limit_l_min                        -29
_diffrn_reflns_limit_l_max                         30
_diffrn_standards_number                           0
_diffrn_standards_interval_count                   .
_diffrn_standards_decay_%                          ?

#==============================================================================
# REFINEMENT DATA

_refine_special_details
;
    Refinement was performed using all reflections. The weighted 
    R-factor (wR) and goodness of fit (S) are based on F^2^.
    R-factor (gt) are based on F. The threshold expression of
    F^2^ > 2.0 sigma(F^2^) is used only for calculating R-factor (gt).
;
_reflns_number_total                               6973
_reflns_number_gt                                  5751
_reflns_threshold_expression                       F^2^>2.0\s(F^2^)
_refine_ls_structure_factor_coef                   Fsqd
_refine_ls_R_factor_all                            0.0787
_refine_ls_R_factor_gt                             0.0685
_refine_ls_wR_factor_ref                           0.2137
_refine_ls_wR_factor_gt                            0.2005
_refine_ls_number_restraints                       0
_refine_ls_hydrogen_treatment                      constr
_refine_ls_number_reflns                           6973
_refine_ls_number_parameters                       515
_refine_ls_goodness_of_fit_ref                     1.102
_refine_ls_weighting_scheme                        calc
_refine_ls_weighting_details
          'w = 1/[\s^2^(Fo^2^)+(0.1099P)^2^+14.3254P] where P=(Fo^2^+2Fc^2^)/3'
_atom_sites_solution_hydrogens                     geom
_atom_sites_solution_primary                       direct
_atom_sites_solution_secondary                     difmap
_refine_ls_shift/su_max                            0.000
_refine_diff_density_max                           0.83
_refine_diff_density_min                          -0.62
_refine_ls_extinction_method                       SHELXL
_refine_ls_extinction_coef                         0.00037(5)

loop_
_atom_type_symbol
_atom_type_description
_atom_type_scat_dispersion_real
_atom_type_scat_dispersion_imag
_atom_type_scat_source
  'C' 'C'  0.0181 0.0091 
;
International Tables for Crystallography
(Vol. C, Tables 4.2.6.8 and 6.1.1.4)
;
  'H' 'H'  0.0000 0.0000 
;
International Tables for Crystallography
(Vol. C, Table 6.1.1.4)
;
  'O' 'O'  0.0492 0.0322 
;
International Tables for Crystallography
(Vol. C, Tables 4.2.6.8 and 6.1.1.4)
;
  'N' 'N'  0.0311 0.0180 
;
International Tables for Crystallography
(Vol. C, Tables 4.2.6.8 and 6.1.1.4)
;

#==============================================================================
# ATOMIC COORDINATES AND THERMAL PARAMETERS

loop_
_atom_site_label
_atom_site_type_symbol
_atom_site_fract_x
_atom_site_fract_y
_atom_site_fract_z
_atom_site_U_iso_or_equiv
_atom_site_adp_type
_atom_site_occupancy
_atom_site_site_symmetry_multiplicity
_atom_site_calc_flag
_atom_site_refinement_flags
_atom_site_disorder_assembly
_atom_site_disorder_group
 O1 O 0.27187(6) 0.0716(2) 0.17454(9) 0.0392(5) Uani 1 8 d . . .
 O2 O 0.25631(6) 0.6555(2) 0.19830(9) 0.0400(5) Uani 1 8 d . . .
 O3 O 0.16934(6) 0.3163(2) 0.09808(9) 0.0411(5) Uani 1 8 d . . .
 O4 O 0.26573(7) -0.0518(2) -0.00066(10) 0.0456(5) Uani 1 8 d . . .
 O5 O 0.30822(6) 0.5183(2) 0.27879(9) 0.0480(5) Uani 1 8 d . . .
 O6 O 0.08368(7) 0.7434(3) 0.04424(11) 0.0537(6) Uani 1 8 d . . .
 O7 O 0.04301(7) 0.1286(3) -0.05982(13) 0.0640(7) Uani 1 8 d . . .
 O8 O 0.05555(8) -0.2316(4) -0.42035(14) 0.0835(9) Uani 1 8 d . . .
 O9 O 0.11941(7) 0.7497(3) 0.15193(11) 0.0573(6) Uani 1 8 d . . .
 O10 O 0.15013(7) -0.1381(3) -0.19384(11) 0.0571(6) Uani 1 8 d . . .
 O11 O 0.07916(9) -0.3797(3) -0.14010(14) 0.0759(8) Uani 1 8 d . . .
 O12 O 0.06842(9) -0.4566(4) -0.37694(15) 0.0832(9) Uani 1 8 d . . .
 O13 O 0.0143(5) 0.9626(12) 0.1936(4) 0.425(12) Uani 1 8 d . . .
 N14 N 0.11968(7) 0.4733(3) 0.02164(11) 0.0379(5) Uani 1 8 d . . .
 N15 N 0.10625(7) 0.2214(2) 0.01852(11) 0.0360(5) Uani 1 8 d . . .
 N16 N 0.26927(6) 0.0071(2) 0.08755(10) 0.0315(5) Uani 1 8 d . . .
 N17 N 0.29906(7) 0.2301(2) 0.14308(11) 0.0331(5) Uani 1 8 d . . .
 N18 N 0.11384(8) -0.2582(3) -0.16772(12) 0.0427(6) Uani 1 8 d . . .
 N19 N 0.13058(8) -0.3752(3) -0.22802(12) 0.0442(6) Uani 1 8 d . . .
 C20 C 0.0328(2) 1.048(3) 0.1742(4) 0.317(12) Uani 1 8 d . . .
 C21 C 0.17628(9) -0.1302(3) -0.03197(13) 0.0367(6) Uani 1 8 d . . .
 C22 C 0.18239(8) -0.0334(3) 0.05948(13) 0.0329(6) Uani 1 8 d . . .
 C23 C 0.30869(8) 0.2605(3) 0.10227(13) 0.0351(6) Uani 1 8 d . . .
 C24 C 0.27737(8) 0.0348(3) 0.04350(13) 0.0337(6) Uani 1 8 d . . .
 C25 C 0.11731(9) -0.0362(3) -0.04670(14) 0.0382(6) Uani 1 8 d . . .
 C26 C 0.30844(8) 0.3372(3) 0.19274(13) 0.0358(6) Uani 1 8 d . . .
 C27 C 0.30009(8) 0.1697(3) 0.05520(13) 0.0339(6) Uani 1 8 d . . .
 C28 C 0.20042(8) -0.0987(3) 0.03428(13) 0.0336(6) Uani 1 8 d . . .
 C29 C 0.13506(9) -0.0984(3) -0.07233(13) 0.0387(6) Uani 1 8 d . . .
 C30 C 0.06573(9) 0.2375(4) -0.03684(15) 0.0455(7) Uani 1 8 d . . .
 C31 C 0.14101(8) -0.0016(3) 0.01941(13) 0.0337(6) Uani 1 8 d . . .
 C32 C 0.27308(8) 0.4421(3) 0.16790(13) 0.0347(6) Uani 1 8 d . . .
 C33 C 0.26033(10) 0.7513(3) 0.24642(15) 0.0439(7) Uani 1 8 d . . .
 C34 C 0.13287(9) -0.2501(3) -0.19620(14) 0.0419(7) Uani 1 8 d . . .
 C35 C 0.11459(9) 0.7176(3) 0.09808(15) 0.0442(7) Uani 1 8 d . . .
 C36 C 0.15282(9) 0.6521(3) 0.11329(15) 0.0468(7) Uani 1 8 d . . .
 C37 C 0.31248(10) 0.1976(4) 0.01311(15) 0.0458(7) Uani 1 8 d . . .
 C38 C 0.27949(8) 0.1010(3) 0.13752(12) 0.0325(6) Uani 1 8 d . . .
 C39 C 0.14782(10) 0.5998(3) 0.05359(16) 0.0453(7) Uani 1 8 d . . .
 C40 C 0.12139(9) 0.0712(3) 0.04596(14) 0.0375(6) Uani 1 8 d . . .
 C41 C 0.08072(9) 0.4932(3) -0.03396(14) 0.0433(7) Uani 1 8 d . . .
 C42 C 0.09738(11) -0.5167(4) -0.19549(16) 0.0522(8) Uani 1 8 d . . .
 C43 C 0.11351(10) -0.5040(4) -0.22655(15) 0.0483(7) Uani 1 8 d . . .
 C44 C 0.10786(10) -0.1204(4) -0.14550(15) 0.0489(7) Uani 1 8 d . . .
 C45 C 0.05316(9) 0.3838(4) -0.06464(15) 0.0467(7) Uani 1 8 d . . .
 C46 C 0.12076(9) -0.2705(4) -0.32481(15) 0.0523(8) Uani 1 8 d . . .
 C47 C 0.09581(10) -0.3862(4) -0.16553(15) 0.0498(8) Uani 1 8 d . . .
 C48 C 0.07911(10) -0.3324(4) -0.37583(16) 0.0541(8) Uani 1 8 d . . .
 C49 C 0.14664(10) -0.3667(4) -0.26404(16) 0.0518(8) Uani 1 8 d . . .
 C50 C 0.08568(12) 0.8240(5) 0.14307(19) 0.0646(10) Uani 1 8 d . . .
 C51 C 0.01113(11) 0.4066(5) -0.12713(18) 0.0681(10) Uani 1 8 d . . .
 C52 C 0.07960(14) -0.6585(5) -0.1926(2) 0.0745(11) Uani 1 8 d . . .
 C53 C 0.01366(13) -0.2760(8) -0.4720(2) 0.112(2) Uani 1 8 d . . .
 C54 C 0.24578(8) -0.1286(3) 0.07764(13) 0.0334(6) Uani 1 8 d . . .
 C55 C 0.28191(8) 0.5403(3) 0.22158(13) 0.0328(6) Uani 1 8 d . . .
 C56 C 0.13421(8) 0.3361(3) 0.04928(13) 0.0335(6) Uani 1 8 d . . .
 C57 C 0.0080(3) 1.1667(12) 0.1785(4) 0.179(4) Uani 1 8 d . . .
 H13 H 0.02154 0.87393 0.19754 0.5095 Uiso 1 8 calc R . .
 H20A H 0.02373 1.02781 0.12989 0.3802 Uiso 1 8 calc R . .
 H20B H 0.06285 1.05765 0.20654 0.3802 Uiso 1 8 calc R . .
 H21 H 0.18832 -0.17397 -0.04948 0.0440 Uiso 1 8 calc R . .
 H22 H 0.19872 -0.01072 0.10452 0.0395 Uiso 1 8 calc R . .
 H23 H 0.32219 0.35115 0.1081 0.0421 Uiso 1 8 calc R . .
 H25 H 0.08878 -0.01691 -0.07437 0.0459 Uiso 1 8 calc R . .
 H26A H 0.33281 0.39541 0.20681 0.0430 Uiso 1 8 calc R . .
 H26B H 0.31505 0.28314 0.23108 0.0430 Uiso 1 8 calc R . .
 H32A H 0.26827 0.50389 0.13253 0.0416 Uiso 1 8 calc R . .
 H32B H 0.24798 0.38401 0.14987 0.0416 Uiso 1 8 calc R . .
 H33A H 0.24031 0.83175 0.22445 0.0526 Uiso 1 8 calc R . .
 H33B H 0.25544 0.69383 0.27276 0.0526 Uiso 1 8 calc R . .
 H33C H 0.28796 0.79306 0.27458 0.0526 Uiso 1 8 calc R . .
 H36A H 0.16151 0.56724 0.14317 0.0561 Uiso 1 8 calc R . .
 H36B H 0.17481 0.72735 0.13618 0.0561 Uiso 1 8 calc R . .
 H37A H 0.30284 0.11611 -0.01797 0.0550 Uiso 1 8 calc R . .
 H37B H 0.30037 0.29085 -0.01059 0.0550 Uiso 1 8 calc R . .
 H37C H 0.34232 0.20417 0.04038 0.0550 Uiso 1 8 calc R . .
 H39A H 0.13735 0.68258 0.02224 0.0544 Uiso 1 8 calc R . .
 H39B H 0.17486 0.57085 0.06654 0.0544 Uiso 1 8 calc R . .
 H40A H 0.09832 0.00935 0.03526 0.0450 Uiso 1 8 calc R . .
 H40B H 0.14161 0.0779 0.0939 0.0450 Uiso 1 8 calc R . .
 H41 H 0.07267 0.58998 -0.05194 0.0520 Uiso 1 8 calc R . .
 H43 H 0.11311 -0.58828 -0.24865 0.0579 Uiso 1 8 calc R . .
 H44A H 0.07902 -0.11574 -0.16262 0.0587 Uiso 1 8 calc R . .
 H44B H 0.11242 -0.03662 -0.16475 0.0587 Uiso 1 8 calc R . .
 H46A H 0.11787 -0.17092 -0.31225 0.0628 Uiso 1 8 calc R . .
 H46B H 0.13524 -0.25885 -0.34351 0.0628 Uiso 1 8 calc R . .
 H49A H 0.14822 -0.46797 -0.27685 0.0622 Uiso 1 8 calc R . .
 H49B H 0.17473 -0.32617 -0.23516 0.0622 Uiso 1 8 calc R . .
 H50A H 0.09235 0.84245 0.18557 0.0775 Uiso 1 8 calc R . .
 H50B H 0.08052 0.91856 0.12074 0.0775 Uiso 1 8 calc R . .
 H50C H 0.06122 0.76172 0.11687 0.0775 Uiso 1 8 calc R . .
 H51A H -0.00389 0.3127 -0.14101 0.0818 Uiso 1 8 calc R . .
 H51B H -0.00331 0.48048 -0.12072 0.0818 Uiso 1 8 calc R . .
 H51C H 0.01307 0.44145 -0.16058 0.0818 Uiso 1 8 calc R . .
 H52A H 0.06965 -0.64242 -0.16753 0.0894 Uiso 1 8 calc R . .
 H52B H 0.05687 -0.69005 -0.23677 0.0894 Uiso 1 8 calc R . .
 H52C H 0.10071 -0.73553 -0.17152 0.0894 Uiso 1 8 calc R . .
 H53A H -0.0011 -0.19333 -0.50229 0.1348 Uiso 1 8 calc R . .
 H53B H 0.01363 -0.36094 -0.49533 0.1348 Uiso 1 8 calc R . .
 H53C H 0.00022 -0.30367 -0.4532 0.1348 Uiso 1 8 calc R . .
 H54A H 0.25475 -0.16531 0.12029 0.0400 Uiso 1 8 calc R . .
 H54B H 0.25156 -0.20674 0.05782 0.0400 Uiso 1 8 calc R . .
 H57A H 0.01244 1.26345 0.16674 0.2143 Uiso 1 8 calc R . .
 H57B H -0.02106 1.14155 0.14842 0.2143 Uiso 1 8 calc R . .
 H57C H 0.01699 1.17057 0.22296 0.2143 Uiso 1 8 calc R . .


loop_
_atom_site_aniso_label
_atom_site_aniso_U_11
_atom_site_aniso_U_22
_atom_site_aniso_U_33
_atom_site_aniso_U_12
_atom_site_aniso_U_13
_atom_site_aniso_U_23
 O1 0.0497(11) 0.0380(10) 0.0376(10) -0.0037(8) 0.0308(9) -0.0028(8)
 O2 0.0483(11) 0.0373(10) 0.0365(10) 0.0046(8) 0.0274(9) -0.0031(8)
 O3 0.0412(11) 0.0378(10) 0.0404(11) 0.0004(8) 0.0234(9) 0.0024(8)
 O4 0.0665(13) 0.0362(10) 0.0479(12) -0.0061(9) 0.0422(11) -0.0104(9)
 O5 0.0545(12) 0.0449(11) 0.0322(11) 0.0056(9) 0.0206(10) -0.0037(9)
 O6 0.0517(13) 0.0531(13) 0.0488(13) 0.0077(10) 0.0274(11) 0.0038(10)
 O7 0.0489(13) 0.0515(14) 0.0738(17) -0.0096(11) 0.0291(12) -0.0154(12)
 O8 0.0515(14) 0.107(2) 0.0609(16) -0.0040(15) 0.0194(13) 0.0277(16)
 O9 0.0525(13) 0.0609(14) 0.0496(13) -0.0009(11) 0.0271(11) -0.0103(11)
 O10 0.0672(15) 0.0504(13) 0.0581(14) -0.0198(11) 0.0410(12) -0.0083(10)
 O11 0.094(2) 0.089(2) 0.0759(18) -0.0229(16) 0.0682(17) -0.0118(15)
 O12 0.0744(18) 0.0702(19) 0.078(2) -0.0155(15) 0.0335(16) -0.0127(15)
 O13 0.52(2) 0.223(10) 0.132(6) -0.159(12) 0.003(9) 0.052(6)
 N14 0.0431(13) 0.0333(12) 0.0397(13) 0.0013(10) 0.0269(11) 0.0041(10)
 N15 0.0407(12) 0.0323(11) 0.0396(12) 0.0001(9) 0.0272(11) -0.0013(9)
 N16 0.0386(11) 0.0245(10) 0.0350(12) -0.0007(9) 0.0246(10) -0.0019(8)
 N17 0.0415(12) 0.0262(10) 0.0349(12) -0.0035(9) 0.0253(10) -0.0038(9)
 N18 0.0500(14) 0.0441(14) 0.0368(13) -0.0060(11) 0.0283(12) -0.0060(10)
 N19 0.0483(14) 0.0440(14) 0.0394(13) -0.0003(11) 0.0267(12) -0.0018(11)
 C20 0.053(3) 0.76(4) 0.092(6) 0.037(10) 0.020(4) -0.049(12)
 C21 0.0464(15) 0.0314(13) 0.0377(14) -0.0029(11) 0.0287(13) -0.0059(11)
 C22 0.0442(14) 0.0244(12) 0.0348(14) -0.0031(10) 0.0267(12) -0.0015(10)
 C23 0.0375(14) 0.0307(13) 0.0384(14) -0.0004(10) 0.0242(12) 0.0012(11)
 C24 0.0420(14) 0.0283(12) 0.0378(14) 0.0042(11) 0.0282(12) 0.0012(11)
 C25 0.0435(15) 0.0326(13) 0.0386(15) -0.0013(11) 0.0255(13) -0.0015(11)
 C26 0.0383(14) 0.0325(13) 0.0336(14) -0.0024(11) 0.0208(12) -0.0070(11)
 C27 0.0390(13) 0.0312(13) 0.0353(14) 0.0024(10) 0.0248(12) 0.0030(10)
 C28 0.0428(14) 0.0223(11) 0.0398(14) -0.0045(10) 0.0276(12) -0.0016(10)
 C29 0.0477(15) 0.0345(14) 0.0349(14) -0.0030(12) 0.0261(13) -0.0042(11)
 C30 0.0402(15) 0.0482(17) 0.0463(17) -0.0027(13) 0.0259(14) -0.0092(13)
 C31 0.0457(14) 0.0248(12) 0.0379(14) -0.0033(10) 0.0296(13) -0.0021(10)
 C32 0.0407(14) 0.0308(13) 0.0307(13) -0.0009(11) 0.0212(12) -0.0033(10)
 C33 0.0531(17) 0.0417(15) 0.0457(17) 0.0004(13) 0.0350(15) -0.0080(13)
 C34 0.0445(15) 0.0444(16) 0.0343(15) -0.0043(13) 0.0231(13) -0.0007(12)
 C35 0.0500(17) 0.0330(14) 0.0459(17) -0.0080(12) 0.0278(15) -0.0046(12)
 C36 0.0434(16) 0.0360(15) 0.0510(18) -0.0047(12) 0.0244(14) -0.0034(13)
 C37 0.0577(18) 0.0417(16) 0.0491(17) -0.0036(14) 0.0385(16) -0.0002(13)
 C38 0.0357(13) 0.0277(12) 0.0335(13) 0.0022(10) 0.0210(11) -0.0008(10)
 C39 0.0525(17) 0.0328(14) 0.0575(18) -0.0028(12) 0.0374(15) 0.0052(13)
 C40 0.0482(15) 0.0288(13) 0.0444(15) -0.0003(11) 0.0330(14) -0.0005(11)
 C41 0.0487(16) 0.0425(16) 0.0425(16) 0.0088(13) 0.0301(14) 0.0074(13)
 C42 0.061(2) 0.0445(17) 0.0421(17) -0.0107(14) 0.0278(16) -0.0031(13)
 C43 0.0583(19) 0.0406(16) 0.0395(16) -0.0001(14) 0.0270(15) -0.0014(13)
 C44 0.0536(17) 0.0508(18) 0.0379(16) 0.0019(14) 0.0261(14) -0.0064(13)
 C45 0.0443(16) 0.0501(17) 0.0440(16) 0.0061(13) 0.0266(14) 0.0019(13)
 C46 0.0432(16) 0.073(2) 0.0426(17) -0.0030(15) 0.0273(14) 0.0015(15)
 C47 0.0560(18) 0.0562(19) 0.0418(16) -0.0119(15) 0.0326(15) -0.0026(14)
 C48 0.0518(18) 0.069(2) 0.0433(18) -0.0047(16) 0.0303(16) -0.0022(16)
 C49 0.0472(17) 0.069(2) 0.0442(17) 0.0046(15) 0.0309(15) -0.0001(15)
 C50 0.065(2) 0.067(2) 0.063(2) 0.0052(18) 0.0402(19) -0.0082(18)
 C51 0.0497(19) 0.076(3) 0.053(2) 0.0084(18) 0.0190(17) 0.0034(18)
 C52 0.090(3) 0.058(2) 0.062(2) -0.022(2) 0.041(2) -0.0010(18)
 C53 0.047(2) 0.176(6) 0.065(3) -0.021(3) 0.011(2) 0.029(3)
 C54 0.0432(14) 0.0241(12) 0.0388(14) -0.0012(10) 0.0284(12) -0.0007(10)
 C55 0.0372(13) 0.0292(13) 0.0351(14) -0.0030(10) 0.0240(12) -0.0014(10)
 C56 0.0423(15) 0.0321(13) 0.0359(14) -0.0005(11) 0.0290(13) -0.0004(10)
 C57 0.113(6) 0.200(10) 0.156(7) 0.042(6) 0.050(5) -0.035(7)

#==============================================================================
_computing_data_collection                        'RAPID AUTO (Rigaku, ????)'
_computing_cell_refinement                        'RAPID AUTO'
_computing_data_reduction                         'RAPID AUTO'
_computing_structure_solution
                                                'SIR2011 (Burla, et al., 2012)'
_computing_structure_refinement
                                                 'SHELXL2013 (Sheldrick, 2008)'
_computing_publication_material
                                          'CrystalStructure 4.1 (Rigaku, 2014)'
_computing_molecular_graphics                     'CrystalStructure 4.1'

#==============================================================================
# MOLECULAR GEOMETRY

_geom_special_details
;
    ENTER SPECIAL DETAILS OF THE MOLECULAR GEOMETRY
;

loop_
_geom_bond_atom_site_label_1
_geom_bond_atom_site_label_2
_geom_bond_distance
_geom_bond_publ_flag
_geom_bond_site_symmetry_1
_geom_bond_site_symmetry_2
O1 C38 1.221(5) yes . .
O2 C33 1.450(5) yes . .
O2 C55 1.337(3) yes . .
O3 C56 1.221(3) yes . .
O4 C24 1.221(4) yes . .
O5 C55 1.205(3) yes . .
O6 C35 1.205(3) yes . .
O7 C30 1.233(4) yes . .
O8 C48 1.317(4) yes . .
O8 C53 1.454(5) yes . .
O9 C35 1.328(5) yes . .
O9 C50 1.441(6) yes . .
O10 C34 1.220(4) yes . .
O11 C47 1.225(7) yes . .
O12 C48 1.200(5) yes . .
O13 C20 1.39(3) yes . .
O13 C57 1.868(15) yes . .
N14 C39 1.471(4) yes . .
N14 C41 1.364(3) yes . .
N14 C56 1.372(3) yes . .
N15 C30 1.394(3) yes . .
N15 C40 1.481(3) yes . .
N15 C56 1.385(3) yes . .
N16 C24 1.410(5) yes . .
N16 C38 1.386(4) yes . .
N16 C54 1.487(4) yes . .
N17 C23 1.382(5) yes . .
N17 C26 1.466(4) yes . .
N17 C38 1.378(4) yes . .
N18 C34 1.387(6) yes . .
N18 C44 1.459(5) yes . .
N18 C47 1.398(5) yes . .
N19 C34 1.371(4) yes . .
N19 C43 1.376(5) yes . .
N19 C49 1.458(7) yes . .
C20 C57 1.54(2) yes . .
C21 C28 1.394(4) yes . .
C21 C29 1.379(4) yes . .
C22 C28 1.400(6) yes . .
C22 C31 1.384(4) yes . .
C23 C27 1.332(5) yes . .
C24 C27 1.453(4) yes . .
C25 C29 1.389(6) yes . .
C25 C31 1.398(4) yes . .
C26 C32 1.518(4) yes . .
C27 C37 1.500(7) yes . .
C28 C54 1.509(4) yes . .
C29 C44 1.519(4) yes . .
C30 C45 1.441(4) yes . .
C31 C40 1.512(6) yes . .
C32 C55 1.502(5) yes . .
C35 C36 1.503(5) yes . .
C36 C39 1.519(6) yes . .
C41 C45 1.340(4) yes . .
C42 C43 1.343(8) yes . .
C42 C47 1.439(6) yes . .
C42 C52 1.505(6) yes . .
C45 C51 1.496(4) yes . .
C46 C48 1.496(4) yes . .
C46 C49 1.525(5) yes . .
O13 H13 0.840 no . .
C20 H20A 0.990 no . .
C20 H20B 0.990 no . .
C21 H21 0.950 no . .
C22 H22 0.950 no . .
C23 H23 0.950 no . .
C25 H25 0.950 no . .
C26 H26A 0.990 no . .
C26 H26B 0.990 no . .
C32 H32A 0.990 no . .
C32 H32B 0.990 no . .
C33 H33A 0.980 no . .
C33 H33B 0.980 no . .
C33 H33C 0.980 no . .
C36 H36A 0.990 no . .
C36 H36B 0.990 no . .
C37 H37A 0.980 no . .
C37 H37B 0.980 no . .
C37 H37C 0.980 no . .
C39 H39A 0.990 no . .
C39 H39B 0.990 no . .
C40 H40A 0.990 no . .
C40 H40B 0.990 no . .
C41 H41 0.950 no . .
C43 H43 0.950 no . .
C44 H44A 0.990 no . .
C44 H44B 0.990 no . .
C46 H46A 0.990 no . .
C46 H46B 0.990 no . .
C49 H49A 0.990 no . .
C49 H49B 0.990 no . .
C50 H50A 0.980 no . .
C50 H50B 0.980 no . .
C50 H50C 0.980 no . .
C51 H51A 0.980 no . .
C51 H51B 0.980 no . .
C51 H51C 0.980 no . .
C52 H52A 0.980 no . .
C52 H52B 0.980 no . .
C52 H52C 0.980 no . .
C53 H53A 0.980 no . .
C53 H53B 0.980 no . .
C53 H53C 0.980 no . .
C54 H54A 0.990 no . .
C54 H54B 0.990 no . .
C57 H57A 0.980 no . .
C57 H57B 0.980 no . .
C57 H57C 0.980 no . .

loop_
_geom_angle_atom_site_label_1
_geom_angle_atom_site_label_2
_geom_angle_atom_site_label_3
_geom_angle
_geom_angle_publ_flag
_geom_angle_site_symmetry_1
_geom_angle_site_symmetry_2
_geom_angle_site_symmetry_3
C33 O2 C55 116.0(2) yes . . .
C48 O8 C53 116.1(4) yes . . .
C35 O9 C50 116.1(3) yes . . .
C20 O13 C57 53.9(10) yes . . .
C39 N14 C41 120.5(2) yes . . .
C39 N14 C56 117.68(19) yes . . .
C41 N14 C56 121.8(2) yes . . .
C30 N15 C40 118.6(2) yes . . .
C30 N15 C56 124.6(2) yes . . .
C40 N15 C56 116.77(19) yes . . .
C24 N16 C38 125.1(2) yes . . .
C24 N16 C54 117.9(2) yes . . .
C38 N16 C54 116.9(3) yes . . .
C23 N17 C26 120.6(2) yes . . .
C23 N17 C38 121.5(3) yes . . .
C26 N17 C38 117.8(3) yes . . .
C34 N18 C44 117.7(3) yes . . .
C34 N18 C47 124.5(3) yes . . .
C44 N18 C47 117.4(4) yes . . .
C34 N19 C43 121.4(4) yes . . .
C34 N19 C49 117.6(3) yes . . .
C43 N19 C49 121.0(3) yes . . .
O13 C20 C57 79.1(10) yes . . .
C28 C21 C29 120.5(4) yes . . .
C28 C22 C31 120.7(3) yes . . .
N17 C23 C27 123.6(3) yes . . .
O4 C24 N16 120.3(3) yes . . .
O4 C24 C27 124.1(4) yes . . .
N16 C24 C27 115.5(3) yes . . .
C29 C25 C31 120.7(3) yes . . .
N17 C26 C32 112.09(19) yes . . .
C23 C27 C24 118.5(4) yes . . .
C23 C27 C37 124.0(3) yes . . .
C24 C27 C37 117.5(3) yes . . .
C21 C28 C22 119.2(3) yes . . .
C21 C28 C54 120.2(4) yes . . .
C22 C28 C54 120.5(2) yes . . .
C21 C29 C25 119.8(3) yes . . .
C21 C29 C44 122.9(4) yes . . .
C25 C29 C44 117.2(3) yes . . .
O7 C30 N15 119.6(3) yes . . .
O7 C30 C45 123.7(2) yes . . .
N15 C30 C45 116.7(3) yes . . .
C22 C31 C25 119.1(4) yes . . .
C22 C31 C40 121.1(3) yes . . .
C25 C31 C40 119.9(3) yes . . .
C26 C32 C55 110.89(19) yes . . .
O10 C34 N18 122.1(3) yes . . .
O10 C34 N19 122.0(4) yes . . .
N18 C34 N19 115.8(3) yes . . .
O6 C35 O9 123.4(4) yes . . .
O6 C35 C36 125.1(4) yes . . .
O9 C35 C36 111.4(2) yes . . .
C35 C36 C39 113.7(2) yes . . .
O1 C38 N16 122.5(3) yes . . .
O1 C38 N17 121.8(3) yes . . .
N16 C38 N17 115.6(3) yes . . .
N14 C39 C36 112.3(4) yes . . .
N15 C40 C31 111.3(3) yes . . .
N14 C41 C45 123.7(3) yes . . .
C43 C42 C47 118.0(4) yes . . .
C43 C42 C52 123.4(4) yes . . .
C47 C42 C52 118.6(5) yes . . .
N19 C43 C42 123.4(3) yes . . .
N18 C44 C29 115.8(2) yes . . .
C30 C45 C41 117.6(2) yes . . .
C30 C45 C51 119.4(3) yes . . .
C41 C45 C51 122.9(3) yes . . .
C48 C46 C49 113.5(3) yes . . .
O11 C47 N18 118.8(4) yes . . .
O11 C47 C42 124.6(4) yes . . .
N18 C47 C42 116.5(4) yes . . .
O8 C48 O12 124.2(3) yes . . .
O8 C48 C46 110.4(3) yes . . .
O12 C48 C46 125.4(3) yes . . .
N19 C49 C46 113.2(3) yes . . .
N16 C54 C28 111.50(19) yes . . .
O2 C55 O5 123.4(3) yes . . .
O2 C55 C32 111.6(2) yes . . .
O5 C55 C32 125.0(3) yes . . .
O3 C56 N14 122.4(2) yes . . .
O3 C56 N15 122.1(2) yes . . .
N14 C56 N15 115.51(19) yes . . .
O13 C57 C20 47.1(10) yes . . .
C20 O13 H13 109.479 no . . .
C57 O13 H13 163.334 no . . .
O13 C20 H20A 115.400 no . . .
O13 C20 H20B 115.396 no . . .
C57 C20 H20A 115.403 no . . .
C57 C20 H20B 115.397 no . . .
H20A C20 H20B 112.415 no . . .
C28 C21 H21 119.726 no . . .
C29 C21 H21 119.725 no . . .
C28 C22 H22 119.663 no . . .
C31 C22 H22 119.675 no . . .
N17 C23 H23 118.236 no . . .
C27 C23 H23 118.187 no . . .
C29 C25 H25 119.675 no . . .
C31 C25 H25 119.672 no . . .
N17 C26 H26A 109.201 no . . .
N17 C26 H26B 109.189 no . . .
C32 C26 H26A 109.187 no . . .
C32 C26 H26B 109.207 no . . .
H26A C26 H26B 107.879 no . . .
C26 C32 H32A 109.465 no . . .
C26 C32 H32B 109.460 no . . .
C55 C32 H32A 109.463 no . . .
C55 C32 H32B 109.454 no . . .
H32A C32 H32B 108.062 no . . .
O2 C33 H33A 109.482 no . . .
O2 C33 H33B 109.471 no . . .
O2 C33 H33C 109.467 no . . .
H33A C33 H33B 109.464 no . . .
H33A C33 H33C 109.471 no . . .
H33B C33 H33C 109.471 no . . .
C35 C36 H36A 108.838 no . . .
C35 C36 H36B 108.820 no . . .
C39 C36 H36A 108.815 no . . .
C39 C36 H36B 108.813 no . . .
H36A C36 H36B 107.689 no . . .
C27 C37 H37A 109.472 no . . .
C27 C37 H37B 109.473 no . . .
C27 C37 H37C 109.473 no . . .
H37A C37 H37B 109.464 no . . .
H37A C37 H37C 109.473 no . . .
H37B C37 H37C 109.471 no . . .
N14 C39 H39A 109.130 no . . .
N14 C39 H39B 109.136 no . . .
C36 C39 H39A 109.123 no . . .
C36 C39 H39B 109.126 no . . .
H39A C39 H39B 107.882 no . . .
N15 C40 H40A 109.351 no . . .
N15 C40 H40B 109.363 no . . .
C31 C40 H40A 109.375 no . . .
C31 C40 H40B 109.378 no . . .
H40A C40 H40B 107.974 no . . .
N14 C41 H41 118.161 no . . .
C45 C41 H41 118.150 no . . .
N19 C43 H43 118.311 no . . .
C42 C43 H43 118.291 no . . .
N18 C44 H44A 108.322 no . . .
N18 C44 H44B 108.315 no . . .
C29 C44 H44A 108.333 no . . .
C29 C44 H44B 108.328 no . . .
H44A C44 H44B 107.407 no . . .
C48 C46 H46A 108.873 no . . .
C48 C46 H46B 108.856 no . . .
C49 C46 H46A 108.867 no . . .
C49 C46 H46B 108.838 no . . .
H46A C46 H46B 107.717 no . . .
N19 C49 H49A 108.919 no . . .
N19 C49 H49B 108.931 no . . .
C46 C49 H49A 108.946 no . . .
C46 C49 H49B 108.945 no . . .
H49A C49 H49B 107.761 no . . .
O9 C50 H50A 109.479 no . . .
O9 C50 H50B 109.481 no . . .
O9 C50 H50C 109.471 no . . .
H50A C50 H50B 109.468 no . . .
H50A C50 H50C 109.466 no . . .
H50B C50 H50C 109.462 no . . .
C45 C51 H51A 109.471 no . . .
C45 C51 H51B 109.463 no . . .
C45 C51 H51C 109.464 no . . .
H51A C51 H51B 109.472 no . . .
H51A C51 H51C 109.472 no . . .
H51B C51 H51C 109.485 no . . .
C42 C52 H52A 109.472 no . . .
C42 C52 H52B 109.465 no . . .
C42 C52 H52C 109.469 no . . .
H52A C52 H52B 109.488 no . . .
H52A C52 H52C 109.470 no . . .
H52B C52 H52C 109.463 no . . .
O8 C53 H53A 109.470 no . . .
O8 C53 H53B 109.470 no . . .
O8 C53 H53C 109.477 no . . .
H53A C53 H53B 109.471 no . . .
H53A C53 H53C 109.471 no . . .
H53B C53 H53C 109.469 no . . .
N16 C54 H54A 109.323 no . . .
N16 C54 H54B 109.333 no . . .
C28 C54 H54A 109.330 no . . .
C28 C54 H54B 109.324 no . . .
H54A C54 H54B 107.963 no . . .
O13 C57 H57A 156.534 no . . .
O13 C57 H57B 83.223 no . . .
O13 C57 H57C 83.224 no . . .
C20 C57 H57A 109.469 no . . .
C20 C57 H57B 109.469 no . . .
C20 C57 H57C 109.469 no . . .
H57A C57 H57B 109.456 no . . .
H57A C57 H57C 109.475 no . . .
H57B C57 H57C 109.489 no . . .

loop_
_geom_torsion_atom_site_label_1
_geom_torsion_atom_site_label_2
_geom_torsion_atom_site_label_3
_geom_torsion_atom_site_label_4
_geom_torsion
_geom_torsion_publ_flag
_geom_torsion_site_symmetry_1
_geom_torsion_site_symmetry_2
_geom_torsion_site_symmetry_3
_geom_torsion_site_symmetry_4
C33 O2 C55 O5 -3.2(5) no . . . .
C33 O2 C55 C32 175.6(3) no . . . .
C53 O8 C48 O12 2.5(8) no . . . .
C53 O8 C48 C46 -178.2(4) no . . . .
C50 O9 C35 O6 -2.4(5) no . . . .
C50 O9 C35 C36 175.2(3) no . . . .
C20 O13 C57 C20 0.0(4) no . . . .
C57 O13 C20 C57 -0.0(3) no . . . .
C39 N14 C41 C45 -178.2(4) no . . . .
C41 N14 C39 C36 103.0(4) no . . . .
C39 N14 C56 O3 -1.2(6) no . . . .
C39 N14 C56 N15 178.2(3) no . . . .
C56 N14 C39 C36 -77.8(4) no . . . .
C41 N14 C56 O3 178.0(4) no . . . .
C41 N14 C56 N15 -2.6(6) no . . . .
C56 N14 C41 C45 2.6(7) no . . . .
C30 N15 C40 C31 93.1(4) no . . . .
C40 N15 C30 O7 3.4(6) no . . . .
C40 N15 C30 C45 -175.5(3) no . . . .
C30 N15 C56 O3 179.4(4) no . . . .
C30 N15 C56 N14 -0.0(6) no . . . .
C56 N15 C30 O7 -178.6(4) no . . . .
C56 N15 C30 C45 2.5(6) no . . . .
C40 N15 C56 O3 -2.5(6) no . . . .
C40 N15 C56 N14 178.1(3) no . . . .
C56 N15 C40 C31 -85.1(3) no . . . .
C24 N16 C38 O1 -179.8(2) no . . . .
C24 N16 C38 N17 -0.0(3) no . . . .
C38 N16 C24 O4 -177.0(2) no . . . .
C38 N16 C24 C27 3.3(3) no . . . .
C24 N16 C54 C28 -90.3(3) no . . . .
C54 N16 C24 O4 -0.9(3) no . . . .
C54 N16 C24 C27 179.45(17) no . . . .
C38 N16 C54 C28 86.2(3) no . . . .
C54 N16 C38 O1 4.0(3) no . . . .
C54 N16 C38 N17 -176.21(17) no . . . .
C23 N17 C26 C32 91.6(3) no . . . .
C26 N17 C23 C27 -178.30(19) no . . . .
C23 N17 C38 O1 178.0(2) no . . . .
C23 N17 C38 N16 -1.8(3) no . . . .
C38 N17 C23 C27 -0.0(3) no . . . .
C26 N17 C38 O1 -3.7(3) no . . . .
C26 N17 C38 N16 176.56(18) no . . . .
C38 N17 C26 C32 -86.7(3) no . . . .
C34 N18 C44 C29 -107.6(3) no . . . .
C44 N18 C34 O10 11.8(3) no . . . .
C44 N18 C34 N19 -167.29(18) no . . . .
C34 N18 C47 O11 -178.6(2) no . . . .
C34 N18 C47 C42 -0.3(3) no . . . .
C47 N18 C34 O10 -175.9(2) no . . . .
C47 N18 C34 N19 5.0(3) no . . . .
C44 N18 C47 O11 -6.3(3) no . . . .
C44 N18 C47 C42 172.02(19) no . . . .
C47 N18 C44 C29 79.6(3) no . . . .
C34 N19 C43 C42 1.2(4) no . . . .
C43 N19 C34 O10 175.5(2) no . . . .
C43 N19 C34 N18 -5.4(3) no . . . .
C34 N19 C49 C46 -70.0(3) no . . . .
C49 N19 C34 O10 -5.0(3) no . . . .
C49 N19 C34 N18 174.09(19) no . . . .
C43 N19 C49 C46 109.6(3) no . . . .
C49 N19 C43 C42 -178.3(2) no . . . .
O13 C20 C57 O13 0.0(3) no . . . .
C28 C21 C29 C25 -0.8(4) no . . . .
C28 C21 C29 C44 175.6(2) no . . . .
C29 C21 C28 C22 -0.4(4) no . . . .
C29 C21 C28 C54 -177.7(2) no . . . .
C28 C22 C31 C25 0.3(4) no . . . .
C28 C22 C31 C40 -179.0(2) no . . . .
C31 C22 C28 C21 0.6(4) no . . . .
C31 C22 C28 C54 178.0(2) no . . . .
N17 C23 C27 C24 3.5(4) no . . . .
N17 C23 C27 C37 -176.43(19) no . . . .
O4 C24 C27 C23 175.5(2) no . . . .
O4 C24 C27 C37 -4.6(4) no . . . .
N16 C24 C27 C23 -4.9(3) no . . . .
N16 C24 C27 C37 175.04(17) no . . . .
C29 C25 C31 C22 -1.5(4) no . . . .
C29 C25 C31 C40 177.8(2) no . . . .
C31 C25 C29 C21 1.7(4) no . . . .
C31 C25 C29 C44 -174.9(2) no . . . .
N17 C26 C32 C55 174.3(3) no . . . .
C21 C28 C54 N16 96.5(3) no . . . .
C22 C28 C54 N16 -80.8(4) no . . . .
C21 C29 C44 N18 43.6(5) no . . . .
C25 C29 C44 N18 -139.9(3) no . . . .
O7 C30 C45 C41 178.6(4) no . . . .
O7 C30 C45 C51 -3.9(7) no . . . .
N15 C30 C45 C41 -2.5(6) no . . . .
N15 C30 C45 C51 175.0(3) no . . . .
C22 C31 C40 N15 114.2(3) no . . . .
C25 C31 C40 N15 -65.1(3) no . . . .
C26 C32 C55 O2 164.9(3) no . . . .
C26 C32 C55 O5 -16.3(5) no . . . .
O6 C35 C36 C39 -7.9(5) no . . . .
O9 C35 C36 C39 174.5(2) no . . . .
C35 C36 C39 N14 -66.4(3) no . . . .
N14 C41 C45 C30 0.1(7) no . . . .
N14 C41 C45 C51 -177.3(4) no . . . .
C43 C42 C47 O11 174.2(2) no . . . .
C43 C42 C47 N18 -4.1(4) no . . . .
C47 C42 C43 N19 3.8(4) no . . . .
C52 C42 C43 N19 -178.5(2) no . . . .
C52 C42 C47 O11 -3.7(4) no . . . .
C52 C42 C47 N18 178.1(2) no . . . .
C48 C46 C49 N19 -66.0(4) no . . . .
C49 C46 C48 O8 166.7(4) no . . . .
C49 C46 C48 O12 -14.0(7) no . . . .

loop_
_geom_contact_atom_site_label_1
_geom_contact_atom_site_label_2
_geom_contact_distance
_geom_contact_publ_flag
_geom_contact_site_symmetry_1
_geom_contact_site_symmetry_2
O1 C22 3.158(3) no . .
O1 C23 3.527(5) no . .
O1 C24 3.593(5) no . .
O1 C26 2.720(3) no . .
O1 C28 3.344(3) no . .
O1 C32 3.351(3) no . .
O1 C54 2.734(4) no . .
O2 C36 3.416(4) no . .
O3 C22 3.459(4) no . .
O3 C30 3.570(3) no . .
O3 C31 3.296(3) no . .
O3 C36 3.188(4) no . .
O3 C39 2.723(3) no . .
O3 C40 2.716(3) no . .
O3 C41 3.512(3) no . .
O4 C21 3.359(5) no . .
O4 C23 3.528(3) no . .
O4 C28 3.392(5) no . .
O4 C37 2.851(4) no . .
O4 C38 3.572(4) no . .
O4 C54 2.736(5) no . .
O5 C26 2.788(4) no . .
O5 C33 2.652(4) no . .
O6 N14 3.106(4) no . .
O6 C39 2.842(5) no . .
O6 C41 3.000(5) no . .
O6 C50 2.640(7) no . .
O7 C25 3.256(5) no . .
O7 C31 3.446(4) no . .
O7 C40 2.722(3) no . .
O7 C41 3.527(4) no . .
O7 C51 2.876(5) no . .
O7 C56 3.560(3) no . .
O10 C43 3.515(4) no . .
O10 C44 2.737(6) no . .
O10 C46 3.081(5) no . .
O10 C47 3.573(6) no . .
O10 C49 2.707(5) no . .
O11 C29 3.147(4) no . .
O11 C34 3.551(6) no . .
O11 C43 3.528(7) no . .
O11 C44 2.672(5) no . .
O11 C52 2.874(6) no . .
O12 N19 3.155(4) no . .
O12 C43 3.172(5) no . .
O12 C49 2.845(4) no . .
O12 C53 2.651(6) no . .
N14 C30 2.769(4) no . .
N14 C35 3.073(5) no . .
N15 C22 3.506(4) no . .
N15 C25 3.084(5) no . .
N15 C41 2.689(4) no . .
N16 C21 3.366(3) no . .
N16 C22 3.238(5) no . .
N16 C23 2.701(4) no . .
N17 C24 2.794(4) no . .
N18 C21 3.048(3) no . .
N18 C43 2.696(5) no . .
N19 C47 2.779(7) no . .
N19 C48 3.075(4) no . .
C21 C31 2.787(6) no . .
C22 C29 2.779(4) no . .
C22 C38 3.433(4) no . .
C23 C32 3.317(6) no . .
C24 C28 3.292(5) no . .
C25 C28 2.778(4) no . .
C25 C30 3.388(5) no . .
C27 C38 2.839(6) no . .
C28 C38 3.223(3) no . .
C29 C34 3.470(6) no . .
C29 C47 3.231(4) no . .
C30 C31 3.309(4) no . .
C31 C56 3.203(4) no . .
C32 C38 3.232(4) no . .
C34 C42 2.831(5) no . .
C34 C46 3.087(6) no . .
C35 C41 3.466(5) no . .
C36 C41 3.408(4) no . .
C36 C56 3.153(4) no . .
C43 C46 3.481(6) no . .
C43 C48 3.577(6) no . .
C45 C56 2.832(3) no . .
O1 C33 3.486(6) no . 6_545
O1 C49 3.255(4) no . 7_545
O2 C54 3.501(4) no . 1_565
O3 C33 3.277(3) no . 6_545
O3 C37 3.435(6) no . 7_555
O4 C21 3.500(4) no . 7_545
O4 C54 3.380(4) no . 7_545
O5 O9 3.390(3) no . 6_545
O5 C33 3.474(4) no . 6_545
O5 C46 3.314(4) no . 7_555
O6 C40 3.338(4) no . 1_565
O6 C53 3.250(6) no . 2_564
O7 O8 3.481(5) no . 4_555
O7 O13 2.881(9) no . 3_565
O7 C20 3.128(13) no . 3_565
O7 C53 3.470(8) no . 4_555
O8 O7 3.481(5) no . 4_554
O8 N15 3.350(6) no . 4_554
O8 C20 3.560(16) no . 4_564
O8 C30 3.330(6) no . 4_554
O9 O5 3.390(3) no . 6_555
O9 O12 3.178(4) no . 4_555
O9 C26 3.327(3) no . 6_555
O10 C26 3.209(4) no . 7_555
O10 C32 3.338(4) no . 7_555
O10 C55 3.446(5) no . 7_555
O11 C41 2.971(6) no . 1_545
O11 C45 3.505(6) no . 1_545
O12 O9 3.178(4) no . 4_554
O12 C35 3.352(6) no . 4_554
O12 C50 3.366(5) no . 4_554
O13 O7 2.881(9) no . 3_565
N15 O8 3.350(6) no . 4_555
N17 C43 3.516(4) no . 7_545
N19 C38 3.580(4) no . 7_545
C20 O7 3.128(13) no . 3_565
C20 O8 3.560(16) no . 4_565
C20 C50 3.441(18) no . .
C21 O4 3.500(4) no . 7_545
C22 C39 3.576(4) no . 1_545
C26 O9 3.327(3) no . 6_545
C26 O10 3.209(4) no . 7_555
C27 C27 3.598(3) no . 7_555
C30 O8 3.330(6) no . 4_555
C30 C53 3.503(9) no . 4_555
C32 O10 3.338(4) no . 7_555
C33 O1 3.486(6) no . 6_555
C33 O3 3.277(3) no . 6_555
C33 O5 3.474(4) no . 6_555
C33 C55 3.526(5) no . 6_555
C35 O12 3.352(6) no . 4_555
C35 C40 3.551(5) no . 1_565
C37 O3 3.435(6) no . 7_555
C37 C56 3.492(7) no . 7_555
C38 N19 3.580(4) no . 7_545
C38 C49 3.507(4) no . 7_545
C39 C22 3.576(4) no . 1_565
C40 O6 3.338(4) no . 1_545
C40 C35 3.551(5) no . 1_545
C41 O11 2.971(6) no . 1_565
C43 N17 3.516(4) no . 7_545
C45 O11 3.505(6) no . 1_565
C46 O5 3.314(4) no . 7_555
C49 O1 3.255(4) no . 7_545
C49 C38 3.507(4) no . 7_545
C50 O12 3.366(5) no . 4_555
C50 C20 3.441(18) no . .
C53 O6 3.250(6) no . 2_544
C53 O7 3.470(8) no . 4_554
C53 C30 3.503(9) no . 4_554
C54 O2 3.501(4) no . 1_545
C54 O4 3.380(4) no . 7_545
C55 O10 3.446(5) no . 7_555
C55 C33 3.526(5) no . 6_545
C56 C37 3.492(7) no . 7_555
O1 H22 2.5072 no . .
O1 H26B 2.4038 no . .
O1 H32B 2.9267 no . .
O1 H54A 2.4181 no . .
O2 H32A 2.4800 no . .
O2 H32B 2.6814 no . .
O2 H36A 3.3561 no . .
O2 H36B 2.7859 no . .
O2 H39B 3.0838 no . .
O3 H22 3.1606 no . .
O3 H32B 2.7293 no . .
O3 H36A 2.6661 no . .
O3 H39B 2.4999 no . .
O3 H40B 2.4133 no . .
O4 H21 2.8549 no . .
O4 H37A 2.4006 no . .
O4 H37B 3.4907 no . .
O4 H37C 3.5263 no . .
O4 H54B 2.4021 no . .
O5 H26A 2.8679 no . .
O5 H26B 2.5667 no . .
O5 H32A 3.0926 no . .
O5 H32B 2.9455 no . .
O5 H33B 2.6352 no . .
O5 H33C 2.6007 no . .
O6 H36A 3.0587 no . .
O6 H36B 2.9864 no . .
O6 H39A 2.6889 no . .
O6 H41 2.6535 no . .
O6 H50B 2.6190 no . .
O6 H50C 2.5933 no . .
O7 H25 2.5315 no . .
O7 H40A 2.3592 no . .
O7 H40B 3.5803 no . .
O7 H51A 2.4408 no . .
O7 H51B 3.5424 no . .
O7 H51C 3.5241 no . .
O8 H46A 2.4404 no . .
O8 H46B 2.6200 no . .
O9 H36A 2.5183 no . .
O9 H36B 2.5922 no . .
O10 H21 3.0790 no . .
O10 H44A 3.5341 no . .
O10 H44B 2.3176 no . .
O10 H46A 2.5198 no . .
O10 H49B 2.5450 no . .
O11 H44A 2.4538 no . .
O11 H52A 2.4386 no . .
O11 H52B 3.4944 no . .
O11 H52C 3.5663 no . .
O12 H43 2.9020 no . .
O12 H46A 3.0735 no . .
O12 H46B 2.9478 no . .
O12 H49A 2.6735 no . .
O12 H53B 2.6091 no . .
O12 H53C 2.6353 no . .
N14 H36A 2.6493 no . .
N14 H36B 3.3174 no . .
N15 H25 2.9802 no . .
N16 H21 3.4557 no . .
N16 H22 3.2379 no . .
N17 H32A 2.7186 no . .
N17 H32B 2.6382 no . .
N18 H21 2.8109 no . .
N19 H46A 2.6647 no . .
N19 H46B 3.3189 no . .
C21 H22 3.2675 no . .
C21 H25 3.2499 no . .
C21 H44A 3.3138 no . .
C21 H44B 2.9035 no . .
C21 H54A 3.2479 no . .
C21 H54B 2.5912 no . .
C22 H21 3.2690 no . .
C22 H25 3.2552 no . .
C22 H40A 3.1739 no . .
C22 H40B 2.5703 no . .
C22 H54A 2.6648 no . .
C22 H54B 3.3036 no . .
C23 H26A 2.5654 no . .
C23 H26B 3.2224 no . .
C23 H32A 3.1535 no . .
C23 H37A 3.2747 no . .
C23 H37B 2.7680 no . .
C23 H37C 2.7680 no . .
C24 H21 3.4735 no . .
C24 H23 3.2547 no . .
C24 H37A 2.5242 no . .
C24 H37B 3.1540 no . .
C24 H37C 3.1532 no . .
C24 H54A 3.2471 no . .
C24 H54B 2.5598 no . .
C25 H21 3.2520 no . .
C25 H22 3.2574 no . .
C25 H40A 2.7395 no . .
C25 H40B 3.3207 no . .
C25 H44A 2.5060 no . .
C25 H44B 2.9696 no . .
C26 H23 2.6133 no . .
C30 H25 2.8868 no . .
C30 H40A 2.5452 no . .
C30 H40B 3.2239 no . .
C30 H41 3.2412 no . .
C30 H51A 2.5535 no . .
C30 H51B 3.1762 no . .
C30 H51C 3.1466 no . .
C32 H23 3.3588 no . .
C32 H39B 3.4204 no . .
C33 H36B 2.8885 no . .
C34 H21 3.0956 no . .
C34 H43 3.2378 no . .
C34 H44A 3.1183 no . .
C34 H44B 2.4472 no . .
C34 H46A 2.7904 no . .
C34 H49A 3.2264 no . .
C34 H49B 2.5997 no . .
C35 H39A 2.6974 no . .
C35 H39B 3.3635 no . .
C35 H41 3.3640 no . .
C35 H50A 3.1635 no . .
C35 H50B 2.5889 no . .
C35 H50C 2.5888 no . .
C36 H33A 3.3549 no . .
C36 H41 3.5072 no . .
C37 H23 2.6508 no . .
C38 H22 3.0807 no . .
C38 H23 3.2494 no . .
C38 H26A 3.2099 no . .
C38 H26B 2.5315 no . .
C38 H32B 2.9806 no . .
C38 H54A 2.5434 no . .
C38 H54B 3.2279 no . .
C39 H41 2.5956 no . .
C40 H22 2.6765 no . .
C40 H25 2.6659 no . .
C41 H39A 2.5216 no . .
C41 H39B 3.1662 no . .
C41 H51A 3.2722 no . .
C41 H51B 2.7544 no . .
C41 H51C 2.7544 no . .
C43 H49A 2.5084 no . .
C43 H49B 3.1382 no . .
C43 H52A 3.2846 no . .
C43 H52B 2.7716 no . .
C43 H52C 2.7717 no . .
C44 H21 2.7131 no . .
C44 H25 2.6091 no . .
C47 H43 3.2449 no . .
C47 H44A 2.5539 no . .
C47 H44B 3.2281 no . .
C47 H52A 2.5438 no . .
C47 H52B 3.1449 no . .
C47 H52C 3.1705 no . .
C48 H43 3.5486 no . .
C48 H49A 2.6958 no . .
C48 H49B 3.3582 no . .
C48 H53A 3.1641 no . .
C48 H53B 2.5948 no . .
C48 H53C 2.5948 no . .
C49 H43 2.6102 no . .
C51 H41 2.6350 no . .
C52 H43 2.6548 no . .
C54 H21 2.6673 no . .
C54 H22 2.6800 no . .
C55 H26A 2.7155 no . .
C55 H26B 2.6327 no . .
C55 H33A 3.1776 no . .
C55 H33B 2.6011 no . .
C55 H33C 2.6011 no . .
C56 H36A 2.8690 no . .
C56 H39A 3.2276 no . .
C56 H39B 2.5724 no . .
C56 H40A 3.2237 no . .
C56 H40B 2.5391 no . .
C56 H41 3.2311 no . .
H13 H20A 2.2971 no . .
H13 H20B 2.2951 no . .
H13 H57A 3.5751 no . .
H13 H57B 2.7957 no . .
H13 H57C 2.7941 no . .
H20A H57A 2.4980 no . .
H20A H57B 2.4279 no . .
H20A H57C 2.9202 no . .
H20B H57A 2.4980 no . .
H20B H57B 2.9202 no . .
H20B H57C 2.4277 no . .
H21 H44B 2.9720 no . .
H21 H54A 3.4925 no . .
H21 H54B 2.4000 no . .
H22 H40A 3.3811 no . .
H22 H40B 2.3583 no . .
H22 H54A 2.5250 no . .
H22 H54B 3.5790 no . .
H23 H26A 2.3709 no . .
H23 H26B 3.4676 no . .
H23 H32A 3.0231 no . .
H23 H37A 3.5716 no . .
H23 H37B 2.6991 no . .
H23 H37C 2.7297 no . .
H25 H40A 2.6540 no . .
H25 H44A 2.2669 no . .
H25 H44B 3.0807 no . .
H26A H32A 2.3450 no . .
H26A H32B 2.8643 no . .
H26B H32A 2.8641 no . .
H26B H32B 2.4092 no . .
H32A H39B 3.1898 no . .
H32B H39B 2.9426 no . .
H33A H36A 3.5159 no . .
H33A H36B 2.4228 no . .
H33B H36A 3.4202 no . .
H33B H36B 3.0487 no . .
H36A H39A 2.8600 no . .
H36A H39B 2.3916 no . .
H36B H39A 2.3951 no . .
H36B H39B 2.3080 no . .
H39A H41 2.2923 no . .
H39B H41 3.3811 no . .
H41 H51A 3.5597 no . .
H41 H51B 2.6806 no . .
H41 H51C 2.7041 no . .
H43 H49A 2.2811 no . .
H43 H49B 3.3458 no . .
H43 H52A 3.5770 no . .
H43 H52B 2.7085 no . .
H43 H52C 2.7214 no . .
H46A H49A 2.8633 no . .
H46A H49B 2.3941 no . .
H46B H49A 2.3948 no . .
H46B H49B 2.3124 no . .
O1 H33A 3.2023 no . 1_545
O1 H33B 2.5223 no . 6_545
O1 H33C 3.3855 no . 1_545
O1 H49A 2.8454 no . 7_545
O1 H49B 2.8298 no . 7_545
O2 H33A 3.5072 no . 6_545
O2 H49B 2.8513 no . 7_555
O2 H54A 2.5750 no . 1_565
O3 H33B 3.0598 no . 6_545
O3 H33C 2.6428 no . 6_545
O3 H37A 3.0213 no . 7_555
O3 H37B 3.3704 no . 7_555
O3 H37C 3.3521 no . 7_555
O3 H46B 2.7054 no . 4_555
O4 H21 2.8993 no . 7_545
O4 H23 3.4436 no . 7_555
O4 H32A 2.8395 no . 7_555
O4 H54B 2.4851 no . 7_545
O5 H22 3.2534 no . 6_555
O5 H33A 2.5922 no . 6_545
O5 H36B 3.2259 no . 6_545
O5 H40B 2.6732 no . 6_555
O5 H46A 2.9684 no . 7_555
O5 H46B 2.8630 no . 7_555
O5 H49B 3.2468 no . 7_555
O6 H40A 2.5241 no . 1_565
O6 H40B 3.5711 no . 1_565
O6 H53A 2.9487 no . 2_564
O6 H53B 3.5412 no . 2_564
O6 H53C 2.7871 no . 2_564
O7 H13 2.8692 no . 3_565
O7 H20A 2.6034 no . 3_565
O7 H53A 3.0690 no . 4_555
O7 H53B 3.3631 no . 4_555
O7 H57B 3.0888 no . 3_565
O8 H20A 3.0054 no . 4_564
O8 H20B 3.5140 no . 4_564
O8 H40A 3.3342 no . 4_554
O8 H50B 2.9730 no . 4_564
O9 H26A 3.2032 no . 6_555
O9 H26B 2.5646 no . 6_555
O9 H40A 3.5040 no . 1_565
O9 H43 3.1332 no . 4_555
O9 H49A 2.9353 no . 4_555
O10 H20B 2.9689 no . 4_564
O10 H23 3.1428 no . 7_555
O10 H26A 2.3918 no . 7_555
O10 H32A 2.9748 no . 7_555
O11 H39A 3.3921 no . 1_545
O11 H41 2.5003 no . 1_545
O11 H51C 2.9413 no . 1_545
O11 H57A 3.5862 no . 3_565
O11 H57B 3.1428 no . 3_565
O11 H57C 3.4107 no . 4_564
O12 H50C 2.7645 no . 4_554
O12 H51B 2.7353 no . 2_544
O12 H53B 3.3811 no . 3_544
O13 H25 3.4388 no . 3_565
O13 H44A 3.2845 no . 4_565
O13 H44B 3.4860 no . 4_565
O13 H50A 3.5585 no . .
O13 H51A 2.7435 no . 3_565
O13 H52B 2.9197 no . 4_555
N14 H37A 3.3866 no . 7_555
N14 H37C 3.3008 no . 7_555
N15 H37C 3.3937 no . 7_555
N15 H46B 3.0372 no . 4_555
N16 H37B 2.9273 no . 7_555
N16 H49B 3.4479 no . 7_545
N17 H37B 3.3827 no . 7_555
N17 H43 3.1861 no . 7_545
N18 H20B 3.1582 no . 4_564
N18 H57C 3.2872 no . 4_564
C20 H44A 3.4860 no . 4_565
C20 H44B 3.3888 no . 4_565
C20 H46A 3.5161 no . 4_565
C20 H50A 2.9641 no . .
C20 H50B 3.2762 no . .
C20 H50C 3.5428 no . .
C20 H51A 3.3956 no . 3_565
C20 H53C 3.5610 no . 4_565
C21 H23 3.2379 no . 7_555
C21 H37B 3.1989 no . 7_555
C21 H39A 3.2178 no . 1_545
C22 H36B 3.0959 no . 1_545
C22 H37B 2.8441 no . 7_555
C22 H39A 2.9633 no . 1_545
C23 H43 3.5022 no . 7_545
C23 H52C 3.0194 no . 7_545
C24 H21 3.5219 no . 7_545
C24 H37B 3.2027 no . 7_555
C25 H37B 3.5428 no . 7_555
C25 H37C 3.3906 no . 7_555
C25 H39A 2.9217 no . 1_545
C25 H57B 3.2954 no . 3_565
C26 H33B 3.5434 no . 6_545
C26 H43 3.4576 no . 7_545
C26 H50A 3.3072 no . 6_545
C27 H52C 3.3363 no . 7_545
C28 H37B 2.8432 no . 7_555
C28 H39A 3.1432 no . 1_545
C28 H39B 3.4441 no . 1_545
C29 H23 3.3319 no . 7_555
C29 H37B 3.5260 no . 7_555
C29 H39A 3.1237 no . 1_545
C30 H53A 3.4428 no . 4_555
C30 H53B 3.1715 no . 4_555
C31 H36B 3.4627 no . 1_545
C31 H37B 3.2153 no . 7_555
C31 H37C 3.3897 no . 7_555
C31 H39A 2.8587 no . 1_545
C32 H33A 3.3463 no . 6_545
C32 H33B 3.3369 no . 6_545
C32 H37A 3.2127 no . 7_555
C33 H26B 3.5480 no . 6_555
C33 H32B 3.1774 no . 6_555
C33 H46B 3.4217 no . 7_555
C33 H49B 2.9757 no . 7_555
C33 H54A 3.2527 no . 1_565
C34 H20B 2.9697 no . 4_564
C34 H26A 3.5874 no . 7_555
C35 H26B 3.5668 no . 6_555
C35 H40A 2.9533 no . 1_565
C35 H40B 3.4658 no . 1_565
C35 H49A 3.4767 no . 4_555
C36 H49A 3.4294 no . 4_555
C37 H32B 3.4342 no . 7_555
C37 H39B 3.4446 no . 7_555
C37 H52C 3.4399 no . 7_545
C38 H33B 3.5463 no . 6_545
C38 H37B 3.0630 no . 7_555
C38 H43 3.5195 no . 7_545
C38 H49A 3.1970 no . 7_545
C38 H49B 3.2081 no . 7_545
C39 H37A 3.3570 no . 7_555
C40 H46B 3.0845 no . 4_555
C40 H50B 3.5725 no . 1_545
C41 H52A 3.4567 no . 1_565
C43 H50A 3.5913 no . 4_554
C44 H20B 3.1391 no . 4_564
C44 H23 3.4391 no . 7_555
C44 H52C 3.5172 no . 1_565
C44 H57B 3.5754 no . 3_565
C44 H57C 3.2033 no . 4_564
C45 H52A 3.1750 no . 1_565
C45 H53B 3.1229 no . 4_555
C46 H20B 3.5557 no . 4_564
C46 H33C 3.1695 no . 7_555
C46 H36A 3.5391 no . 4_554
C46 H40B 3.2558 no . 4_554
C46 H50B 3.4613 no . 4_564
C47 H57C 3.3510 no . 4_564
C48 H51B 3.5334 no . 2_544
C49 H33C 2.9794 no . 7_555
C49 H36A 3.3809 no . 4_554
C49 H54A 3.4624 no . 7_545
C50 H20A 3.0106 no . .
C50 H20B 3.1738 no . .
C50 H26A 3.2977 no . 6_555
C50 H26B 3.3513 no . 6_555
C50 H40A 3.5900 no . 1_565
C50 H43 3.1408 no . 4_555
C50 H46A 3.3213 no . 4_565
C50 H51A 3.5939 no . 3_565
C50 H53A 3.1545 no . 2_564
C51 H13 2.9254 no . 3_565
C51 H50C 3.5318 no . 3_565
C51 H52A 3.2336 no . 1_565
C51 H52B 2.9983 no . 2_564
C51 H53B 3.4130 no . 4_555
C51 H53C 3.5669 no . 2_564
C51 H57A 3.1069 no . 3_575
C52 H13 3.0489 no . 4_554
C52 H37C 3.2535 no . 7_545
C52 H44B 3.5801 no . 1_545
C52 H51A 3.4628 no . 2_544
C52 H51C 3.4754 no . 1_545
C52 H51C 3.4828 no . 2_544
C53 H20A 3.3060 no . 4_564
C53 H50C 3.0966 no . 2_544
C53 H51B 3.4945 no . 2_544
C53 H53B 3.4004 no . 3_544
C54 H32A 3.5049 no . 1_545
C54 H37B 3.4492 no . 7_555
C54 H49B 3.3523 no . 7_545
C55 H33A 2.8316 no . 6_545
C55 H33B 3.5370 no . 6_545
C55 H46A 3.4919 no . 7_555
C55 H46B 3.5158 no . 7_555
C55 H49B 3.0427 no . 7_555
C55 H54A 3.4155 no . 1_565
C56 H37A 3.2253 no . 7_555
C56 H37C 3.0733 no . 7_555
C56 H46B 2.8673 no . 4_555
C57 H25 3.4529 no . 3_565
C57 H44A 3.4182 no . 3_565
C57 H44A 3.3224 no . 4_565
C57 H51B 3.4789 no . 3_575
C57 H53C 3.4832 no . 4_565
C57 H57C 3.3299 no . 2_555
H13 O7 2.8692 no . 3_565
H13 C51 2.9254 no . 3_565
H13 C52 3.0489 no . 4_555
H13 H44B 3.5490 no . 4_565
H13 H50A 3.1672 no . .
H13 H50C 3.5423 no . .
H13 H51A 2.0550 no . 3_565
H13 H51C 3.0651 no . 3_565
H13 H52A 3.4788 no . 4_555
H13 H52B 2.1787 no . 4_555
H13 H52C 3.1933 no . 4_555
H20A O7 2.6034 no . 3_565
H20A O8 3.0054 no . 4_565
H20A C50 3.0106 no . .
H20A C53 3.3060 no . 4_565
H20A H46A 3.4634 no . 4_565
H20A H50A 2.8179 no . .
H20A H50B 2.7079 no . .
H20A H50C 2.9978 no . .
H20A H51A 3.2428 no . 3_565
H20A H53A 3.4842 no . 2_564
H20A H53A 3.2941 no . 4_565
H20A H53C 3.0425 no . 4_565
H20B O8 3.5140 no . 4_565
H20B O10 2.9689 no . 4_565
H20B N18 3.1582 no . 4_565
H20B C34 2.9697 no . 4_565
H20B C44 3.1391 no . 4_565
H20B C46 3.5557 no . 4_565
H20B C50 3.1738 no . .
H20B H44A 3.1001 no . 4_565
H20B H44B 2.6540 no . 4_565
H20B H46A 2.8180 no . 4_565
H20B H50A 2.5343 no . .
H20B H50B 3.0358 no . .
H20B H50C 3.5297 no . .
H21 O4 2.8993 no . 7_545
H21 C24 3.5219 no . 7_545
H21 H23 3.1952 no . 7_555
H21 H54B 2.8568 no . 7_545
H22 O5 3.2534 no . 6_545
H22 H33A 2.8550 no . 1_545
H22 H33B 3.1283 no . 6_545
H22 H36B 2.8800 no . 1_545
H22 H37B 3.1792 no . 7_555
H22 H39A 3.4679 no . 1_545
H23 O4 3.4436 no . 7_555
H23 O10 3.1428 no . 7_555
H23 C21 3.2379 no . 7_555
H23 C29 3.3319 no . 7_555
H23 C44 3.4391 no . 7_555
H23 H21 3.1952 no . 7_555
H23 H44B 2.7248 no . 7_555
H23 H52C 2.7502 no . 7_545
H25 O13 3.4388 no . 3_565
H25 C57 3.4529 no . 3_565
H25 H39A 3.3937 no . 1_545
H25 H57B 2.4930 no . 3_565
H26A O9 3.2032 no . 6_545
H26A O10 2.3918 no . 7_555
H26A C34 3.5874 no . 7_555
H26A C50 3.2977 no . 6_545
H26A H43 3.3030 no . 7_545
H26A H44B 3.3406 no . 7_555
H26A H46A 3.3179 no . 7_555
H26A H50A 2.6487 no . 6_545
H26B O9 2.5646 no . 6_545
H26B C33 3.5480 no . 6_545
H26B C35 3.5668 no . 6_545
H26B C50 3.3513 no . 6_545
H26B H33A 3.1933 no . 6_545
H26B H33B 2.9871 no . 6_545
H26B H36A 3.4081 no . 6_545
H26B H36B 3.2707 no . 6_545
H26B H43 3.2500 no . 7_545
H26B H49A 3.0989 no . 7_545
H26B H50A 3.0843 no . 6_545
H32A O4 2.8395 no . 7_555
H32A O10 2.9748 no . 7_555
H32A C54 3.5049 no . 1_565
H32A H37A 2.8193 no . 7_555
H32A H54A 3.0191 no . 1_565
H32A H54B 3.0741 no . 1_565
H32B C33 3.1774 no . 6_545
H32B C37 3.4342 no . 7_555
H32B H33A 3.0504 no . 6_545
H32B H33B 2.7259 no . 6_545
H32B H33C 3.2404 no . 6_545
H32B H37A 2.7128 no . 7_555
H32B H37B 3.2797 no . 7_555
H33A O1 3.2023 no . 1_565
H33A O2 3.5072 no . 6_555
H33A O5 2.5922 no . 6_555
H33A C32 3.3463 no . 6_555
H33A C55 2.8316 no . 6_555
H33A H22 2.8550 no . 1_565
H33A H26B 3.1933 no . 6_555
H33A H32B 3.0504 no . 6_555
H33A H33B 3.2719 no . 6_555
H33A H49B 3.3743 no . 7_555
H33A H54A 3.1361 no . 1_565
H33B O1 2.5223 no . 6_555
H33B O3 3.0598 no . 6_555
H33B C26 3.5434 no . 6_555
H33B C32 3.3369 no . 6_555
H33B C38 3.5463 no . 6_555
H33B C55 3.5370 no . 6_555
H33B H22 3.1283 no . 6_555
H33B H26B 2.9871 no . 6_555
H33B H32B 2.7259 no . 6_555
H33B H33A 3.2719 no . 6_545
H33C O1 3.3855 no . 1_565
H33C O3 2.6428 no . 6_555
H33C C46 3.1695 no . 7_555
H33C C49 2.9794 no . 7_555
H33C H32B 3.2404 no . 6_555
H33C H36A 3.0959 no . 6_555
H33C H40B 3.4255 no . 6_555
H33C H46A 3.5770 no . 7_555
H33C H46B 2.5384 no . 7_555
H33C H49A 3.0617 no . 7_555
H33C H49B 2.3578 no . 7_555
H33C H54A 3.3851 no . 1_565
H36A C46 3.5391 no . 4_555
H36A C49 3.3809 no . 4_555
H36A H26B 3.4081 no . 6_555
H36A H33C 3.0959 no . 6_545
H36A H46B 3.0893 no . 4_555
H36A H49A 2.6330 no . 4_555
H36B O5 3.2259 no . 6_555
H36B C22 3.0959 no . 1_565
H36B C31 3.4627 no . 1_565
H36B H22 2.8800 no . 1_565
H36B H26B 3.2707 no . 6_555
H36B H40B 3.3553 no . 1_565
H37A O3 3.0213 no . 7_555
H37A N14 3.3866 no . 7_555
H37A C32 3.2127 no . 7_555
H37A C39 3.3570 no . 7_555
H37A C56 3.2253 no . 7_555
H37A H32A 2.8193 no . 7_555
H37A H32B 2.7128 no . 7_555
H37A H39B 2.6064 no . 7_555
H37B O3 3.3704 no . 7_555
H37B N16 2.9273 no . 7_555
H37B N17 3.3827 no . 7_555
H37B C21 3.1989 no . 7_555
H37B C22 2.8441 no . 7_555
H37B C24 3.2027 no . 7_555
H37B C25 3.5428 no . 7_555
H37B C28 2.8432 no . 7_555
H37B C29 3.5260 no . 7_555
H37B C31 3.2153 no . 7_555
H37B C38 3.0630 no . 7_555
H37B C54 3.4492 no . 7_555
H37B H22 3.1792 no . 7_555
H37B H32B 3.2797 no . 7_555
H37C O3 3.3521 no . 7_555
H37C N14 3.3008 no . 7_555
H37C N15 3.3937 no . 7_555
H37C C25 3.3906 no . 7_555
H37C C31 3.3897 no . 7_555
H37C C52 3.2535 no . 7_545
H37C C56 3.0733 no . 7_555
H37C H39B 3.4691 no . 7_555
H37C H52A 3.1196 no . 7_545
H37C H52C 2.7233 no . 7_545
H39A O11 3.3921 no . 1_565
H39A C21 3.2178 no . 1_565
H39A C22 2.9633 no . 1_565
H39A C25 2.9217 no . 1_565
H39A C28 3.1432 no . 1_565
H39A C29 3.1237 no . 1_565
H39A C31 2.8587 no . 1_565
H39A H22 3.4679 no . 1_565
H39A H25 3.3937 no . 1_565
H39A H40A 3.4857 no . 1_565
H39B C28 3.4441 no . 1_565
H39B C37 3.4446 no . 7_555
H39B H37A 2.6064 no . 7_555
H39B H37C 3.4691 no . 7_555
H39B H54A 3.5966 no . 1_565
H40A O6 2.5241 no . 1_545
H40A O8 3.3342 no . 4_555
H40A O9 3.5040 no . 1_545
H40A C35 2.9533 no . 1_545
H40A C50 3.5900 no . 1_545
H40A H39A 3.4857 no . 1_545
H40A H46B 3.3870 no . 4_555
H40A H50B 2.8790 no . 1_545
H40B O5 2.6732 no . 6_545
H40B O6 3.5711 no . 1_545
H40B C35 3.4658 no . 1_545
H40B C46 3.2558 no . 4_555
H40B H33C 3.4255 no . 6_545
H40B H36B 3.3553 no . 1_545
H40B H46A 3.2764 no . 4_555
H40B H46B 2.4422 no . 4_555
H40B H50B 3.3555 no . 1_545
H41 O11 2.5003 no . 1_565
H41 H53C 3.2668 no . 2_564
H41 H57A 3.1885 no . 3_575
H41 H57B 3.1868 no . 3_575
H43 O9 3.1332 no . 4_554
H43 N17 3.1861 no . 7_545
H43 C23 3.5022 no . 7_545
H43 C26 3.4576 no . 7_545
H43 C38 3.5195 no . 7_545
H43 C50 3.1408 no . 4_554
H43 H26A 3.3030 no . 7_545
H43 H26B 3.2500 no . 7_545
H43 H50A 2.6713 no . 4_554
H43 H50C 3.1783 no . 4_554
H44A O13 3.2845 no . 4_564
H44A C20 3.4860 no . 4_564
H44A C57 3.4182 no . 3_565
H44A C57 3.3224 no . 4_564
H44A H20B 3.1001 no . 4_564
H44A H52C 3.5935 no . 1_565
H44A H57B 2.6717 no . 3_565
H44A H57C 3.3048 no . 3_565
H44A H57C 2.5131 no . 4_564
H44B O13 3.4860 no . 4_564
H44B C20 3.3888 no . 4_564
H44B C52 3.5801 no . 1_565
H44B H13 3.5490 no . 4_564
H44B H20B 2.6540 no . 4_564
H44B H23 2.7248 no . 7_555
H44B H26A 3.3406 no . 7_555
H44B H52C 2.7478 no . 1_565
H44B H57C 3.3831 no . 4_564
H46A O5 2.9684 no . 7_555
H46A C20 3.5161 no . 4_564
H46A C50 3.3213 no . 4_564
H46A C55 3.4919 no . 7_555
H46A H20A 3.4634 no . 4_564
H46A H20B 2.8180 no . 4_564
H46A H26A 3.3179 no . 7_555
H46A H33C 3.5770 no . 7_555
H46A H40B 3.2764 no . 4_554
H46A H50A 3.1388 no . 4_564
H46A H50B 2.7038 no . 4_564
H46B O3 2.7054 no . 4_554
H46B O5 2.8630 no . 7_555
H46B N15 3.0372 no . 4_554
H46B C33 3.4217 no . 7_555
H46B C40 3.0845 no . 4_554
H46B C55 3.5158 no . 7_555
H46B C56 2.8673 no . 4_554
H46B H33C 2.5384 no . 7_555
H46B H36A 3.0893 no . 4_554
H46B H40A 3.3870 no . 4_554
H46B H40B 2.4422 no . 4_554
H46B H50B 3.5875 no . 4_564
H49A O1 2.8454 no . 7_545
H49A O9 2.9353 no . 4_554
H49A C35 3.4767 no . 4_554
H49A C36 3.4294 no . 4_554
H49A C38 3.1970 no . 7_545
H49A H26B 3.0989 no . 7_545
H49A H33C 3.0617 no . 7_555
H49A H36A 2.6330 no . 4_554
H49B O1 2.8298 no . 7_545
H49B O2 2.8513 no . 7_555
H49B O5 3.2468 no . 7_555
H49B N16 3.4479 no . 7_545
H49B C33 2.9757 no . 7_555
H49B C38 3.2081 no . 7_545
H49B C54 3.3523 no . 7_545
H49B C55 3.0427 no . 7_555
H49B H33A 3.3743 no . 7_555
H49B H33C 2.3578 no . 7_555
H49B H54A 2.5973 no . 7_545
H50A O13 3.5585 no . .
H50A C20 2.9641 no . .
H50A C26 3.3072 no . 6_555
H50A C43 3.5913 no . 4_555
H50A H13 3.1672 no . .
H50A H20A 2.8179 no . .
H50A H20B 2.5343 no . .
H50A H26A 2.6487 no . 6_555
H50A H26B 3.0843 no . 6_555
H50A H43 2.6713 no . 4_555
H50A H46A 3.1388 no . 4_565
H50A H51A 3.4038 no . 3_565
H50A H52B 3.4551 no . 4_555
H50B O8 2.9730 no . 4_565
H50B C20 3.2762 no . .
H50B C40 3.5725 no . 1_565
H50B C46 3.4613 no . 4_565
H50B H20A 2.7079 no . .
H50B H20B 3.0358 no . .
H50B H40A 2.8790 no . 1_565
H50B H40B 3.3555 no . 1_565
H50B H46A 2.7038 no . 4_565
H50B H46B 3.5875 no . 4_565
H50B H53A 2.9808 no . 2_564
H50C O12 2.7645 no . 4_555
H50C C20 3.5428 no . .
H50C C51 3.5318 no . 3_565
H50C C53 3.0966 no . 2_564
H50C H13 3.5423 no . .
H50C H20A 2.9978 no . .
H50C H20B 3.5297 no . .
H50C H43 3.1783 no . 4_555
H50C H51A 2.9031 no . 3_565
H50C H51B 3.3039 no . 3_565
H50C H53A 2.4774 no . 2_564
H50C H53B 2.9655 no . 2_564
H50C H53C 3.4188 no . 2_564
H51A O13 2.7435 no . 3_565
H51A C20 3.3956 no . 3_565
H51A C50 3.5939 no . 3_565
H51A C52 3.4628 no . 2_564
H51A H13 2.0550 no . 3_565
H51A H20A 3.2428 no . 3_565
H51A H50A 3.4038 no . 3_565
H51A H50C 2.9031 no . 3_565
H51A H52A 3.5599 no . 1_565
H51A H52B 2.5240 no . 2_564
H51A H53B 3.4393 no . 4_555
H51B O12 2.7353 no . 2_564
H51B C48 3.5334 no . 2_564
H51B C53 3.4945 no . 2_564
H51B C57 3.4789 no . 3_575
H51B H50C 3.3039 no . 3_565
H51B H52B 3.3116 no . 2_564
H51B H53B 3.0944 no . 4_555
H51B H53C 2.6930 no . 2_564
H51B H57A 2.5246 no . 3_575
H51C O11 2.9413 no . 1_565
H51C C52 3.4754 no . 1_565
H51C C52 3.4828 no . 2_564
H51C H13 3.0651 no . 3_565
H51C H52A 2.5878 no . 1_565
H51C H52B 2.7258 no . 2_564
H51C H57A 2.8356 no . 3_575
H52A C41 3.4567 no . 1_545
H52A C45 3.1750 no . 1_545
H52A C51 3.2336 no . 1_545
H52A H13 3.4788 no . 4_554
H52A H37C 3.1196 no . 7_545
H52A H51A 3.5599 no . 1_545
H52A H51C 2.5878 no . 1_545
H52B O13 2.9197 no . 4_554
H52B C51 2.9983 no . 2_544
H52B H13 2.1787 no . 4_554
H52B H50A 3.4551 no . 4_554
H52B H51A 2.5240 no . 2_544
H52B H51B 3.3116 no . 2_544
H52B H51C 2.7258 no . 2_544
H52C C23 3.0194 no . 7_545
H52C C27 3.3363 no . 7_545
H52C C37 3.4399 no . 7_545
H52C C44 3.5172 no . 1_545
H52C H13 3.1933 no . 4_554
H52C H23 2.7502 no . 7_545
H52C H37C 2.7233 no . 7_545
H52C H44A 3.5935 no . 1_545
H52C H44B 2.7478 no . 1_545
H53A O6 2.9487 no . 2_544
H53A O7 3.0690 no . 4_554
H53A C30 3.4428 no . 4_554
H53A C50 3.1545 no . 2_544
H53A H20A 3.4842 no . 2_544
H53A H20A 3.2941 no . 4_564
H53A H50B 2.9808 no . 2_544
H53A H50C 2.4774 no . 2_544
H53A H53A 3.4919 no . 3_554
H53B O6 3.5412 no . 2_544
H53B O7 3.3631 no . 4_554
H53B O12 3.3811 no . 3_544
H53B C30 3.1715 no . 4_554
H53B C45 3.1229 no . 4_554
H53B C51 3.4130 no . 4_554
H53B C53 3.4004 no . 3_544
H53B H50C 2.9655 no . 2_544
H53B H51A 3.4393 no . 4_554
H53B H51B 3.0944 no . 4_554
H53B H53B 2.7037 no . 3_544
H53B H53C 3.2178 no . 3_544
H53C O6 2.7871 no . 2_544
H53C C20 3.5610 no . 4_564
H53C C51 3.5669 no . 2_544
H53C C57 3.4832 no . 4_564
H53C H20A 3.0425 no . 4_564
H53C H41 3.2668 no . 2_544
H53C H50C 3.4188 no . 2_544
H53C H51B 2.6930 no . 2_544
H53C H53B 3.2178 no . 3_544
H53C H57A 2.8769 no . 4_564
H53C H57B 3.5961 no . 4_564
H54A O2 2.5750 no . 1_545
H54A C33 3.2527 no . 1_545
H54A C49 3.4624 no . 7_545
H54A C55 3.4155 no . 1_545
H54A H32A 3.0191 no . 1_545
H54A H33A 3.1361 no . 1_545
H54A H33C 3.3851 no . 1_545
H54A H39B 3.5966 no . 1_545
H54A H49B 2.5973 no . 7_545
H54B O4 2.4851 no . 7_545
H54B H21 2.8568 no . 7_545
H54B H32A 3.0741 no . 1_545
H54B H54B 3.0513 no . 7_545
H57A O11 3.5862 no . 3_565
H57A C51 3.1069 no . 3_575
H57A H41 3.1885 no . 3_575
H57A H51B 2.5246 no . 3_575
H57A H51C 2.8356 no . 3_575
H57A H53C 2.8769 no . 4_565
H57B O7 3.0888 no . 3_565
H57B O11 3.1428 no . 3_565
H57B C25 3.2954 no . 3_565
H57B C44 3.5754 no . 3_565
H57B H25 2.4930 no . 3_565
H57B H41 3.1868 no . 3_575
H57B H44A 2.6717 no . 3_565
H57B H53C 3.5961 no . 4_565
H57B H57C 3.2765 no . 2_555
H57C O11 3.4107 no . 4_565
H57C N18 3.2872 no . 4_565
H57C C44 3.2033 no . 4_565
H57C C47 3.3510 no . 4_565
H57C C57 3.3299 no . 2_555
H57C H44A 3.3048 no . 3_565
H57C H44A 2.5131 no . 4_565
H57C H44B 3.3831 no . 4_565
H57C H57B 3.2765 no . 2_555
H57C H57C 2.5483 no . 2_555

#==============================================================================

#==============================================================================
# Additional structures and associated data_? identifiers
# should be added at this point if there is more than one 
# structure analysis in the CIF.


_shelxl_res_file
;
TITL 20160303tris
CELL  1.54187 41.67124 9.02761 26.18779 90.00000 128.24660 90.00000
ZERR  8 0.00088 0.00018 0.00052 0.00000 0.00090 0.00000
LATT 7
SYMM    -X,    +Y, .50-Z
SFAC C H O N
UNIT 288 336 96 48
L.S. 20
FMAP 2
PLAN -67
WPDB -2
HTAB
BOND $H
CONF
LIST 4
TEMP -100.0
ACTA
SIZE 0.650 0.650 0.180
WGHT    0.109900   14.325400
EXTI    0.000373
FVAR       0.25125
O1    3    0.271875    0.071607    0.174536    11.00000    0.04971    0.03802 =
         0.03758   -0.00284    0.03084   -0.00372
O2    3    0.256308    0.655478    0.198298    11.00000    0.04833    0.03727 =
         0.03654   -0.00305    0.02736    0.00462
O3    3    0.169337    0.316341    0.098081    11.00000    0.04122    0.03778 =
         0.04041    0.00242    0.02340    0.00040
O4    3    0.265726   -0.051805   -0.000657    11.00000    0.06647    0.03615 =
         0.04786   -0.01038    0.04222   -0.00606
O5    3    0.308222    0.518273    0.278793    11.00000    0.05448    0.04487 =
         0.03219   -0.00373    0.02063    0.00565
O6    3    0.083683    0.743362    0.044239    11.00000    0.05170    0.05307 =
         0.04885    0.00377    0.02741    0.00775
O7    3    0.043012    0.128614   -0.059816    11.00000    0.04892    0.05148 =
         0.07377   -0.01543    0.02910   -0.00957
O8    3    0.055546   -0.231565   -0.420351    11.00000    0.05147    0.10731 =
         0.06088    0.02772    0.01937   -0.00397
O9    3    0.119410    0.749690    0.151931    11.00000    0.05254    0.06090 =
         0.04958   -0.01026    0.02714   -0.00089
O10   3    0.150131   -0.138119   -0.193843    11.00000    0.06721    0.05044 =
         0.05806   -0.00835    0.04096   -0.01983
O11   3    0.079163   -0.379677   -0.140099    11.00000    0.09422    0.08853 =
         0.07594   -0.01180    0.06817   -0.02289
O12   3    0.068424   -0.456619   -0.376942    11.00000    0.07438    0.07016 =
         0.07781   -0.01267    0.03350   -0.01551
O13   3    0.014251    0.962643    0.193623    11.00000    0.52029    0.22272 =
         0.13173    0.05213    0.00298   -0.15911
AFIX  83
H13   2    0.021543    0.873932    0.197542    11.00000   -1.20000
AFIX   0
N14   4    0.119684    0.473265    0.021640    11.00000    0.04310    0.03335 =
         0.03969    0.00407    0.02688    0.00133
N15   4    0.106253    0.221365    0.018519    11.00000    0.04069    0.03235 =
         0.03961   -0.00129    0.02722    0.00009
N16   4    0.269270    0.007106    0.087546    11.00000    0.03857    0.02451 =
         0.03503   -0.00186    0.02458   -0.00068
N17   4    0.299061    0.230153    0.143082    11.00000    0.04145    0.02624 =
         0.03491   -0.00379    0.02527   -0.00347
N18   4    0.113835   -0.258236   -0.167716    11.00000    0.04999    0.04412 =
         0.03682   -0.00605    0.02829   -0.00603
N19   4    0.130578   -0.375200   -0.228024    11.00000    0.04830    0.04402 =
         0.03938   -0.00179    0.02667   -0.00029
C20   1    0.032790    1.048288    0.174190    11.00000    0.05253    0.75506 =
         0.09233   -0.04914    0.01968    0.03714
AFIX  23
H20A  2    0.023729    1.027806    0.129893    11.00000   -1.20000
H20B  2    0.062851    1.057651    0.206538    11.00000   -1.20000
AFIX   0
C21   1    0.176279   -0.130226   -0.031971    11.00000    0.04636    0.03141 =
         0.03773   -0.00591    0.02872   -0.00294
AFIX  43
H21   2    0.188316   -0.173970   -0.049479    11.00000   -1.20000
AFIX   0
C22   1    0.182392   -0.033407    0.059481    11.00000    0.04422    0.02441 =
         0.03477   -0.00147    0.02673   -0.00314
AFIX  43
H22   2    0.198720   -0.010723    0.104521    11.00000   -1.20000
AFIX   0
C23   1    0.308693    0.260520    0.102266    11.00000    0.03751    0.03070 =
         0.03841    0.00117    0.02419   -0.00037
AFIX  43
H23   2    0.322186    0.351148    0.108101    11.00000   -1.20000
AFIX   0
C24   1    0.277375    0.034833    0.043497    11.00000    0.04202    0.02828 =
         0.03783    0.00117    0.02815    0.00418
C25   1    0.117311   -0.036182   -0.046698    11.00000    0.04355    0.03256 =
         0.03863   -0.00150    0.02547   -0.00134
AFIX  43
H25   2    0.088775   -0.016906   -0.074374    11.00000   -1.20000
AFIX   0
C26   1    0.308441    0.337211    0.192742    11.00000    0.03833    0.03251 =
         0.03356   -0.00697    0.02076   -0.00241
AFIX  23
H26A  2    0.332814    0.395412    0.206810    11.00000   -1.20000
H26B  2    0.315045    0.283137    0.231084    11.00000   -1.20000
AFIX   0
C27   1    0.300089    0.169655    0.055201    11.00000    0.03896    0.03119 =
         0.03532    0.00304    0.02483    0.00235
C28   1    0.200417   -0.098692    0.034279    11.00000    0.04278    0.02228 =
         0.03975   -0.00162    0.02756   -0.00447
C29   1    0.135056   -0.098446   -0.072326    11.00000    0.04773    0.03449 =
         0.03491   -0.00424    0.02612   -0.00301
C30   1    0.065730    0.237533   -0.036835    11.00000    0.04018    0.04821 =
         0.04633   -0.00920    0.02590   -0.00268
C31   1    0.141008   -0.001587    0.019406    11.00000    0.04571    0.02478 =
         0.03793   -0.00208    0.02959   -0.00330
C32   1    0.273081    0.442049    0.167904    11.00000    0.04072    0.03080 =
         0.03071   -0.00329    0.02117   -0.00090
AFIX  23
H32A  2    0.268269    0.503888    0.132528    11.00000   -1.20000
H32B  2    0.247979    0.384011    0.149867    11.00000   -1.20000
AFIX   0
C33   1    0.260331    0.751299    0.246424    11.00000    0.05305    0.04167 =
         0.04572   -0.00795    0.03497    0.00042
AFIX  33
H33A  2    0.240308    0.831753    0.224447    11.00000   -1.20000
H33B  2    0.255442    0.693830    0.272763    11.00000   -1.20000
H33C  2    0.287960    0.793065    0.274585    11.00000   -1.20000
AFIX   0
C34   1    0.132866   -0.250134   -0.196199    11.00000    0.04451    0.04435 =
         0.03435   -0.00071    0.02310   -0.00426
C35   1    0.114585    0.717602    0.098077    11.00000    0.05000    0.03297 =
         0.04589   -0.00460    0.02778   -0.00805
C36   1    0.152823    0.652129    0.113287    11.00000    0.04344    0.03605 =
         0.05103   -0.00339    0.02435   -0.00470
AFIX  23
H36A  2    0.161510    0.567237    0.143172    11.00000   -1.20000
H36B  2    0.174814    0.727347    0.136181    11.00000   -1.20000
AFIX   0
C37   1    0.312482    0.197619    0.013108    11.00000    0.05766    0.04171 =
         0.04911   -0.00017    0.03850   -0.00364
AFIX  33
H37A  2    0.302844    0.116109   -0.017968    11.00000   -1.20000
H37B  2    0.300373    0.290850   -0.010588    11.00000   -1.20000
H37C  2    0.342324    0.204167    0.040383    11.00000   -1.20000
AFIX   0
C38   1    0.279488    0.100962    0.137524    11.00000    0.03566    0.02774 =
         0.03352   -0.00077    0.02105    0.00217
C39   1    0.147820    0.599749    0.053594    11.00000    0.05246    0.03281 =
         0.05746    0.00523    0.03736   -0.00280
AFIX  23
H39A  2    0.137354    0.682577    0.022241    11.00000   -1.20000
H39B  2    0.174865    0.570850    0.066539    11.00000   -1.20000
AFIX   0
C40   1    0.121388    0.071150    0.045958    11.00000    0.04816    0.02878 =
         0.04440   -0.00052    0.03299   -0.00033
AFIX  23
H40A  2    0.098324    0.009346    0.035256    11.00000   -1.20000
H40B  2    0.141615    0.077898    0.093897    11.00000   -1.20000
AFIX   0
C41   1    0.080721    0.493172   -0.033960    11.00000    0.04868    0.04253 =
         0.04253    0.00740    0.03009    0.00878
AFIX  43
H41   2    0.072673    0.589984   -0.051938    11.00000   -1.20000
AFIX   0
C42   1    0.097382   -0.516714   -0.195494    11.00000    0.06141    0.04452 =
         0.04209   -0.00312    0.02779   -0.01075
C43   1    0.113506   -0.503987   -0.226547    11.00000    0.05825    0.04064 =
         0.03948   -0.00135    0.02704   -0.00015
AFIX  43
H43   2    0.113108   -0.588280   -0.248650    11.00000   -1.20000
AFIX   0
C44   1    0.107856   -0.120349   -0.145502    11.00000    0.05356    0.05080 =
         0.03785   -0.00639    0.02606    0.00189
AFIX  23
H44A  2    0.079015   -0.115743   -0.162616    11.00000   -1.20000
H44B  2    0.112417   -0.036618   -0.164746    11.00000   -1.20000
AFIX   0
C45   1    0.053160    0.383828   -0.064642    11.00000    0.04432    0.05012 =
         0.04399    0.00189    0.02657    0.00610
C46   1    0.120765   -0.270522   -0.324810    11.00000    0.04316    0.07265 =
         0.04264    0.00149    0.02728   -0.00304
AFIX  23
H46A  2    0.117874   -0.170923   -0.312254    11.00000   -1.20000
H46B  2    0.135235   -0.258849   -0.343508    11.00000   -1.20000
AFIX   0
C47   1    0.095805   -0.386189   -0.165531    11.00000    0.05603    0.05617 =
         0.04181   -0.00256    0.03257   -0.01186
C48   1    0.079107   -0.332430   -0.375826    11.00000    0.05177    0.06881 =
         0.04334   -0.00217    0.03026   -0.00468
C49   1    0.146636   -0.366711   -0.264035    11.00000    0.04717    0.06946 =
         0.04415   -0.00014    0.03092    0.00455
AFIX  23
H49A  2    0.148221   -0.467972   -0.276849    11.00000   -1.20000
H49B  2    0.174727   -0.326169   -0.235155    11.00000   -1.20000
AFIX   0
C50   1    0.085676    0.824054    0.143067    11.00000    0.06501    0.06669 =
         0.06318   -0.00820    0.04018    0.00522
AFIX  33
H50A  2    0.092349    0.842449    0.185566    11.00000   -1.20000
H50B  2    0.080522    0.918561    0.120741    11.00000   -1.20000
H50C  2    0.061217    0.761723    0.116867    11.00000   -1.20000
AFIX   0
C51   1    0.011131    0.406579   -0.127126    11.00000    0.04971    0.07641 =
         0.05282    0.00343    0.01904    0.00840
AFIX  33
H51A  2   -0.003888    0.312702   -0.141006    11.00000   -1.20000
H51B  2   -0.003311    0.480480   -0.120721    11.00000   -1.20000
H51C  2    0.013066    0.441454   -0.160576    11.00000   -1.20000
AFIX   0
C52   1    0.079604   -0.658542   -0.192574    11.00000    0.08980    0.05845 =
         0.06223   -0.00097    0.04055   -0.02169
AFIX  33
H52A  2    0.069650   -0.642416   -0.167526    11.00000   -1.20000
H52B  2    0.056870   -0.690048   -0.236769    11.00000   -1.20000
H52C  2    0.100714   -0.735532   -0.171524    11.00000   -1.20000
AFIX   0
C53   1    0.013658   -0.275997   -0.472002    11.00000    0.04727    0.17597 =
         0.06521    0.02893    0.01068   -0.02104
AFIX  33
H53A  2   -0.001101   -0.193326   -0.502289    11.00000   -1.20000
H53B  2    0.013627   -0.360939   -0.495335    11.00000   -1.20000
H53C  2    0.000215   -0.303675   -0.453195    11.00000   -1.20000
AFIX   0
C54   1    0.245783   -0.128593    0.077642    11.00000    0.04318    0.02410 =
         0.03882   -0.00074    0.02836   -0.00116
AFIX  23
H54A  2    0.254752   -0.165306    0.120291    11.00000   -1.20000
H54B  2    0.251565   -0.206740    0.057819    11.00000   -1.20000
AFIX   0
C55   1    0.281911    0.540247    0.221576    11.00000    0.03719    0.02921 =
         0.03512   -0.00138    0.02397   -0.00296
C56   1    0.134211    0.336092    0.049285    11.00000    0.04228    0.03209 =
         0.03585   -0.00036    0.02898   -0.00053
C57   1    0.008051    1.166684    0.178467    11.00000    0.11273    0.19984 =
         0.15622   -0.03532    0.04988    0.04188
AFIX  33
H57A  2    0.012445    1.263445    0.166744    11.00000   -1.20000
H57B  2   -0.021060    1.141548    0.148422    11.00000   -1.20000
H57C  2    0.016988    1.170574    0.222962    11.00000   -1.20000
AFIX   0
HKLF 4
 
REM  20160303tris
REM R1 =  0.0685 for    5751 Fo > 4sig(Fo)  and  0.0787 for all    6973 data
REM    515 parameters refined using      0 restraints
 
END  
     
WGHT      0.1074     15.1066 

REM Instructions for potential hydrogen bonds
EQIV $1 -x, -y+1, -z
HTAB C20 O7_$1
EQIV $2 -x+1/2, -y+1/2, -z
HTAB C26 O10_$2
EQIV $3 -x+1/2, y-1/2, -z+1/2
HTAB C26 O9_$3
EQIV $4 -x+1/2, y+1/2, -z+1/2
HTAB C33 O5_$4
HTAB C33 O1_$4
HTAB C33 O3_$4
EQIV $5 x, y-1, z
HTAB C40 O6_$5
EQIV $6 x, y+1, z
HTAB C41 O11_$6
HTAB C46 O10
HTAB C54 O2_$5
EQIV $7 -x+1/2, -y-1/2, -z
HTAB C54 O4_$7

REM Highest difference peak  0.831,  deepest hole -0.615,  1-sigma level  0.067
Q1    1   0.0310  0.0724 -0.3127  11.00000  0.05    0.83
Q2    1  -0.0150  0.0621 -0.3108  11.00000  0.05    0.58
Q3    1   0.0140 -0.0484 -0.3059  11.00000  0.05    0.57
Q4    1   0.3314  0.1185  0.0199  11.00000  0.05    0.51
Q5    1   0.0858 -0.7554 -0.2186  11.00000  0.05    0.51
Q6    1   0.3269  0.2895  0.0258  11.00000  0.05    0.48
Q7    1   0.2889  0.2004 -0.0325  11.00000  0.05    0.46
Q8    1   0.0061  0.3309 -0.1601  11.00000  0.05    0.44
Q9    1  -0.0087  0.3878 -0.1201  11.00000  0.05    0.44
Q10   1   0.1252 -0.0461 -0.1672  11.00000  0.05    0.44
Q11   1  -0.0127 -0.1893 -0.3717  11.00000  0.05    0.40
Q12   1   0.0086  0.5174 -0.1424  11.00000  0.05    0.39
Q13   1   0.0515 -0.6375 -0.2100  11.00000  0.05    0.36
Q14   1   0.0935 -0.6924 -0.1488  11.00000  0.05    0.35
Q15   1   0.0123 -0.1183 -0.4084  11.00000  0.05    0.32
Q16   1  -0.0073  0.0391 -0.2418  11.00000  0.05    0.31
Q17   1   0.2415  0.7303  0.2494  11.00000  0.05    0.30
Q18   1   0.0265 -0.0812 -0.3824  11.00000  0.05    0.30
Q19   1   0.0033 -0.1327 -0.4596  11.00000  0.05    0.29
Q20   1   0.0911 -0.1745 -0.2887  11.00000  0.05    0.27
Q21   1   0.0084 -0.2373 -0.2892  11.00000  0.05    0.25
Q22   1   0.1295 -0.0061 -0.0092  11.00000  0.05    0.25
Q23   1   0.1298 -0.1048 -0.0895  11.00000  0.05    0.23
Q24   1   0.1889 -0.0982  0.0407  11.00000  0.05    0.22
Q25   1   0.2590  0.8569  0.2277  11.00000  0.05    0.22
Q26   1   0.1344  0.0403  0.0302  11.00000  0.05    0.22
Q27   1   0.3065  0.1832  0.0343  11.00000  0.05    0.21
Q28   1   0.1872 -0.0871  0.0031  11.00000  0.05    0.21
Q29   1   0.0495 -0.1881 -0.3888  11.00000  0.05    0.21
Q30   1   0.2756  0.4818  0.1904  11.00000  0.05    0.20
Q31   1   0.2875  0.3868  0.1809  11.00000  0.05    0.20
Q32   1   0.0016  0.0985 -0.1292  11.00000  0.05    0.20
Q33   1   0.1242 -0.1049 -0.0612  11.00000  0.05    0.20
Q34   1   0.2857  0.7379  0.2887  11.00000  0.05    0.20
Q35   1   0.2756  0.0138  0.0731  11.00000  0.05    0.19
Q36   1   0.1629 -0.0009  0.0389  11.00000  0.05    0.19
Q37   1   0.2917  0.1760  0.1411  11.00000  0.05    0.19
Q38   1   0.3050  0.5540  0.2497  11.00000  0.05    0.18
Q39   1   0.2738  0.0486  0.1073  11.00000  0.05    0.18
Q40   1   0.2177  0.6583  0.1584  11.00000  0.05    0.18
Q41   1   0.1740  0.3966  0.1210  11.00000  0.05    0.18
Q42   1   0.3004  0.2565  0.1193  11.00000  0.05    0.18
Q43   1   0.0781  0.7199  0.1533  11.00000  0.05    0.18
Q44   1   0.2918  0.1113  0.0511  11.00000  0.05    0.18
Q45   1   0.0182 -0.4376 -0.4757  11.00000  0.05    0.18
Q46   1  -0.0389  0.1184 -0.3485  11.00000  0.05    0.17
Q47   1   0.1160 -0.3047 -0.2916  11.00000  0.05    0.17
Q48   1   0.1366 -0.3219 -0.2901  11.00000  0.05    0.17
Q49   1   0.0046 -0.3700 -0.4583  11.00000  0.05    0.17
Q50   1   0.2809 -0.0452  0.0297  11.00000  0.05    0.17
Q51   1   0.1905  0.5764  0.1117  11.00000  0.05    0.16
Q52   1   0.1201  0.2771  0.0371  11.00000  0.05    0.16
Q53   1   0.1737  0.4224  0.0883  11.00000  0.05    0.16
Q54   1   0.1763  0.2797  0.1292  11.00000  0.05    0.16
Q55   1   0.3123  0.5957  0.3066  11.00000  0.05    0.16
Q56   1   0.2189  0.7612  0.2201  11.00000  0.05    0.16
Q57   1   0.1273  0.6501  0.1805  11.00000  0.05    0.16
Q58   1  -0.0140 -0.1959 -0.4502  11.00000  0.05    0.16
Q59   1   0.1092  0.8662  0.1981  11.00000  0.05    0.15
Q60   1   0.0808 -0.5597 -0.1885  11.00000  0.05    0.15
Q61   1   0.2951  0.2255  0.0628  11.00000  0.05    0.15
Q62   1   0.3145  0.1837  0.0900  11.00000  0.05    0.15
Q63   1   0.2936  0.4948  0.2579  11.00000  0.05    0.15
Q64   1   0.0524  0.3300 -0.0512  11.00000  0.05    0.14
Q65   1   0.3429  0.3393  0.1393  11.00000  0.05    0.14
Q66   1   0.0706  0.4236 -0.0629  11.00000  0.05    0.14
Q67   1   0.1485 -0.2669 -0.1164  11.00000  0.05    0.14
;

_shelxl_hkl_file
;
   0   0   2 1297.09   56.41
   0   0   2 1239.59   53.21
   0   0   2 1182.66   55.35
   0   0   2 1385.11   63.01
   0   0   2 1543.45   69.97
   0   0  -2 1082.15   48.52
   0   0  -2 1373.15   62.60
   0   0  -2 1126.21   49.06
   0   0  -2 1050.18   49.21
   0   0  -2 1433.18   64.50
   0   0   3   -0.03    0.77
   0   0   3    1.75    0.23
   0   0   3    2.10    0.16
   0   0   3    1.90    0.52
   0   0   3    1.94    0.47
   0   0  -3    2.06    0.30
   0   0  -3    2.73    0.43
   0   0  -3    2.42    0.45
   0   0  -3    1.99    0.26
   0   0  -3    2.91    0.49
   0   0   4   30.40    2.13
   0   0   4   32.60    2.50
   0   0   4   38.17    1.32
   0   0   4   33.77    2.30
   0   0  -4   29.40    2.33
   0   0  -4   28.72    1.23
   0   0  -4   33.01    0.98
   0   0  -4   31.32    2.05
   0   0   5   10.68    0.85
   0   0   5    8.56    2.04
   0   0   5    7.01    2.87
   0   0   5    7.07    1.66
   0   0  -5    9.10    1.50
   0   0  -5    7.31    0.81
   0   0  -5    7.52    0.88
   0   0  -5    7.69    1.76
   0   0   6 2468.38  153.27
   0   0   6 2745.34  178.75
   0   0   6 2404.14  164.37
   0   0   6 2689.25  180.03
   0   0   6 2513.91  150.10
   0   0  -6 2235.55  139.64
   0   0  -6 2579.39  154.05
   0   0  -6 2107.52  144.35
   0   0  -6 2563.23  166.56
   0   0   7    2.13    1.30
   0   0   7    3.76    0.38
   0   0   7    3.15    1.06
   0   0   7    2.69    1.51
   0   0  -7    3.26    0.77
   0   0  -7    2.66    1.51
   0   0  -7    2.17    0.79
   0   0  -7    1.40    0.61
   0   0   8 2541.82  180.83
   0   0   8 2715.98  184.70
   0   0   8 2430.94  174.29
   0   0   8 2653.26  160.93
   0   0  -8 2580.31  155.57
   0   0  -8 2660.46  179.41
   0   0  -8 2247.88  160.16
   0   0  -8 2501.36  179.64
   0   0  -8 2335.92  150.70
   0   0   9    0.65    0.13
   0   0   9   -0.35    1.81
   0   0   9    1.78    1.24
   0   0   9    0.17    1.64
   0   0  -9    2.70    0.98
   0   0  -9    0.67    0.36
   0   0  -9    1.32    0.76
   0   0  -9    1.20    0.11
   0   0  10  836.33   47.47
   0   0  10  843.65   49.03
   0   0  10  874.29   45.88
   0   0 -10  922.15   47.50
   0   0 -10  792.00   44.91
   0   0 -10  779.53   36.44
   0   0  11    0.99    1.03
   0   0  11    1.41    2.26
   0   0  11    2.42    1.42
   0   0 -11    2.66    1.00
   0   0 -11    2.38    1.28
   0   0  12  621.32   35.86
   0   0  12  596.80   36.75
   0   0  12  653.36   34.48
   0   0 -12  616.95   34.93
   0   0 -12  649.78   33.73
   0   0  13    0.45    1.05
   0   0  13    0.80    1.36
   0   0  13    0.63    1.35
   0   0 -13    1.92    1.22
   0   0 -13    1.37    0.92
   0   0  14   92.23    7.88
   0   0  14   92.42    7.48
   0   0 -14  100.40    6.18
   0   0 -14  102.04    7.25
   0   0  15   -0.08    1.38
   0   0  15   -0.68    1.37
   0   0 -15    1.76    1.13
   0   0  16    9.82    3.00
   0   0  16   10.41    3.04
   0   0 -16    8.80    2.52
   0   0  17    0.55    2.02
   0   0  17   -0.15    1.27
   0   0  18   12.18    3.68
   0   0  18   14.52    3.64
   0   0  19    0.57    3.43
   0   0  19    2.99    2.19
   0   0  20    2.47    2.11
   0   0  20    1.31    2.04
   0   0  21   -0.63    1.57
   0   0  21   -0.23    1.49
   0   0  22   50.50    6.72
   0   0  22   82.43    7.31
   0   0  23    0.67    2.39
   0   0  24   11.56    4.43
   0   2   0  345.43   18.60
   0   2   0  335.09   13.20
   0   2   0  342.12   16.01
   0   2   0  340.93   13.65
   0  -2   0  341.89   16.42
   0  -2   0  343.55   16.46
   0  -2   0  356.90   17.20
   0  -2   0  348.32   14.09
   0  -2   0  349.66   18.64
   0  -2   0  377.59   14.21
   0   2  -1  504.27   23.96
   0   2  -1  477.37   21.29
   0   2   1  502.00   22.98
   0   2   1  493.36   25.94
   0   2  -1  502.05   20.32
   0   2   1  450.68   20.46
   0   2   1  466.42   18.60
   0   2  -1  495.51   23.38
   0   2  -1  497.76   23.45
   0   2  -1  516.35   26.41
   0  -2   1  476.59   31.43
   0  -2   1  492.44   21.57
   0  -2  -1  497.88   22.44
   0  -2  -1  507.55   24.20
   0  -2  -1  452.13   22.54
   0  -2  -1  535.02   24.92
   0  -2  -1  482.90   26.46
   0  -2   1  485.46   18.36
   0  -2   1  493.43   23.29
   0   2   2   60.89    2.42
   0   2  -2   75.47    5.49
   0   2   2   82.32    7.15
   0   2   2   63.96    2.40
   0   2   2   66.60    5.61
   0   2   2   70.33    4.43
   0   2  -2   72.62    5.25
   0   2  -2   71.36    2.22
   0   2  -2   74.64    4.74
   0   2  -2   78.96    4.56
   0   2  -2   74.33    4.37
   0  -2   2   85.74    7.09
   0  -2   2   77.03    4.59
   0  -2   2   71.60    1.68
   0  -2  -2   74.14    7.51
   0  -2  -2   71.31    4.87
   0  -2  -2   68.55    5.98
   0  -2  -2   62.44    4.52
   0  -2  -2   70.11    4.87
   0  -2   2   77.10    5.40
   0   2  -3   96.75    5.35
   0   2   3   94.83    4.66
   0   2   3   88.56    8.13
   0   2   3   91.05    2.68
   0   2   3   84.42    4.87
   0   2  -3  105.22    4.51
   0   2  -3   89.48    6.94
   0   2  -3  105.83    5.07
   0  -2   3  100.43    5.30
   0  -2   3   94.55    4.30
   0  -2   3   96.64    5.04
   0  -2   3   91.60    4.98
   0  -2  -3   84.56    4.69
   0  -2  -3   91.08    5.38
   0  -2  -3   93.59    4.65
   0   2  -4 1849.71  117.37
   0   2   4 1872.29  105.71
   0   2   4 2063.95  127.02
   0   2  -4 1951.97  117.03
   0   2  -4 2016.30  124.97
   0   2   4 2125.64  133.79
   0   2   4 1807.05  102.80
   0   2  -4 2104.67  131.56
   0   2   4 2048.41  133.17
   0  -2   4 2176.91  137.08
   0  -2  -4 2044.16  123.50
   0  -2  -4 1851.02  121.07
   0  -2  -4 2038.80  126.04
   0  -2   4 1899.68  119.40
   0  -2   4 1864.17  116.49
   0  -2   4 1842.56  110.94
   0   2   5    1.35    0.31
   0   2   5    1.32    0.72
   0   2   5   -0.19    0.33
   0   2  -5    3.76    0.79
   0   2  -5    1.21    0.20
   0   2   5    0.55    0.84
   0   2  -5    1.41    0.71
   0   2  -5    0.96    0.66
   0   2  -5    0.65    0.47
   0   2  -5    1.22    0.10
   0  -2   5    1.01    0.91
   0  -2   5    1.52    0.46
   0  -2   5    1.45    0.76
   0  -2  -5    1.35    0.56
   0  -2  -5    1.33    0.71
   0  -2  -5    0.74    0.69
   0  -2   5    0.73    0.57
   0  -2  -5    1.44    0.95
   0   2  -6   42.03    2.21
   0   2   6   45.26    4.53
   0   2   6   39.67    2.26
   0   2  -6   41.54    1.75
   0   2   6   41.64    3.80
   0   2  -6   42.80    1.01
   0   2  -6   37.08    2.71
   0   2  -6   34.36    2.54
   0   2  -6   40.82    1.46
   0  -2  -6   45.14    2.03
   0  -2   6   35.99    3.28
   0  -2   6   35.95    1.69
   0  -2  -6   41.38    3.37
   0  -2  -6   35.25    1.53
   0  -2   6   41.35    1.87
   0  -2  -6   40.48    2.66
   0  -2  -6   41.15    3.39
   0  -2   6   35.92    2.72
   0   2  -7 1476.61   85.26
   0   2   7 1382.00   80.60
   0   2  -7 1344.68   80.20
   0   2   7 1456.88   79.45
   0   2  -7 1306.96   74.05
   0   2  -7 1384.83   70.20
   0   2   7 1390.94   82.99
   0   2  -7 1176.86   58.88
   0   2  -7 1452.34   76.67
   0  -2  -7 1402.22   81.58
   0  -2   7 1444.21   88.82
   0  -2   7 1383.42   74.05
   0  -2   7 1312.57   70.32
   0  -2  -7 1524.14   83.94
   0  -2   7 1208.74   73.25
   0  -2  -7 1361.09   84.74
   0  -2  -7 1170.62   63.28
   0  -2  -7 1475.82   82.08
   0   2  -8   29.03    3.02
   0   2   8   24.64    4.67
   0   2  -8   33.08    2.80
   0   2   8   23.99    1.86
   0   2  -8   31.16    1.33
   0   2  -8   23.99    1.03
   0   2   8   22.84    2.82
   0   2  -8   25.36    2.56
   0   2  -8   24.28    1.20
   0  -2   8   28.44    4.39
   0  -2  -8   18.68    2.16
   0  -2  -8   24.46    1.56
   0  -2   8   28.66    1.39
   0  -2  -8   20.40    2.62
   0  -2  -8   22.37    3.44
   0  -2   8   25.55    1.45
   0  -2  -8   23.92    1.84
   0  -2   8   27.34    3.44
   0   2  -9  266.43   13.22
   0   2   9  270.78   12.17
   0   2  -9  257.31   10.63
   0   2   9  263.31   13.85
   0   2  -9  250.77    9.00
   0   2   9  264.20   13.76
   0   2  -9  232.72   12.99
   0  -2   9  265.58   15.48
   0  -2   9  249.23   10.48
   0  -2   9  235.87   12.85
   0  -2  -9  240.08   12.56
   0  -2  -9  268.27   10.54
   0  -2  -9  259.54   14.91
   0  -2   9  250.18   10.32
   0  -2  -9  241.01    9.82
   0  -2   9  263.69    9.64
   0  -2  -9  263.95   12.74
   0   2 -10   29.23    2.60
   0   2  10   19.74    2.84
   0   2  10   19.46    2.89
   0   2 -10   20.07    1.18
   0   2  10   17.68    2.03
   0   2 -10   23.54    4.13
   0  -2 -10   15.97    2.51
   0  -2  10   25.28    5.08
   0  -2 -10   17.56    1.23
   0  -2 -10   18.31    1.57
   0  -2 -10   20.67    1.43
   0  -2  10   19.48    2.64
   0   2  11  126.91    9.39
   0   2  11  141.02    8.96
   0   2  11  140.32    8.80
   0   2 -11  126.31    8.12
   0   2 -11  140.00    8.04
   0  -2  11  121.52    9.35
   0  -2  11  128.42    8.34
   0  -2 -11  164.02    7.66
   0  -2 -11  117.17    7.61
   0  -2 -11  134.56    7.69
   0   2  12  150.49    9.35
   0   2  12  154.41    9.92
   0   2  12  135.96    8.24
   0   2 -12  145.28    9.00
   0   2 -12  157.25   11.06
   0  -2  12  135.16   11.88
   0  -2  12  133.87   10.16
   0  -2 -12  125.22    5.96
   0  -2 -12  128.47    8.38
   0   2  13  107.86    7.53
   0   2  13   89.37    6.77
   0   2  13  112.88    8.32
   0  -2  13   93.37    7.32
   0  -2  13   90.77    8.41
   0  -2 -13   89.27    4.79
   0   2  14  113.18    8.04
   0   2  14   88.98    7.20
   0   2  14  109.44    8.66
   0  -2  14   94.54    7.91
   0  -2  14   92.09    8.88
   0  -2 -14   81.68    5.06
   0   2  15   16.25    3.87
   0   2  15   17.26    3.37
   0  -2  15   12.39    4.09
   0  -2  15   18.01    3.45
   0   2  16    0.73    1.66
   0   2  16    1.40    1.87
   0  -2  16    1.46    1.99
   0  -2  16    0.82    2.85
   0   2  17   49.04    6.17
   0  -2  17   41.00    6.66
   0  -2  17   48.15    5.96
   0  -2 -17   39.90    6.35
   0   2  18  150.68   11.83
   0  -2  18  138.67   11.52
   0  -2  18  121.39   12.69
   0  -2 -18  125.49   11.55
   0   2  19   30.55    4.76
   0  -2  19   26.08    4.93
   0  -2  19   24.53    4.72
   0  -2 -19    0.56    6.72
   0   2  20  225.13   16.22
   0  -2  20  176.15   16.34
   0  -2  20  223.49   16.26
   0  -2 -20  196.85   15.73
   0   2  21   18.85    3.48
   0  -2  21   12.82    3.41
   0  -2  21   17.81    3.44
   0  -2 -21    1.24    2.71
   0   2  22   53.71    6.11
   0  -2  22   50.38    6.01
   0  -2  22   38.13    9.05
   0   2  23    3.95    1.85
   0  -2  23    3.39    1.81
   0  -2  23    2.73    1.70
   0  -2 -23    0.69    0.95
   0   2  24    6.52    1.75
   0   2 -24    0.00    1.96
   0  -2  24    2.23    1.46
   0   4   0  585.10   33.76
   0   4   0  615.85   31.86
   0   4   0  617.19   30.11
   0   4   0  579.02   29.84
   0  -4   0  579.84   34.85
   0  -4   0  611.03   31.81
   0  -4   0  578.04   30.74
   0  -4   0  596.99   27.86
   0   4  -1  220.93   14.24
   0   4   1  220.31    8.63
   0   4  -1  224.63   11.57
   0   4   1  207.90   10.54
   0   4   1  239.67   13.88
   0   4  -1  222.37    9.55
   0   4  -1  201.27   12.82
   0  -4   1  228.83   13.55
   0  -4   1  206.04   11.07
   0  -4  -1  212.61   13.87
   0  -4   1  214.82   14.94
   0  -4   1  199.25    8.41
   0  -4  -1  229.14   11.81
   0  -4   1  216.31    8.10
   0  -4  -1  224.99   10.10
   0  -4  -1  230.08   11.53
   0  -4  -1  233.04   12.40
   0   4  -2  265.61   13.96
   0   4  -2  272.42   13.77
   0   4   2  291.03   11.05
   0   4   2  264.67   15.59
   0   4  -2  284.40   12.62
   0   4  -2  281.07   15.94
   0   4   2  274.43   13.47
   0   4   2  307.92   13.34
   0  -4   2  289.95   14.60
   0  -4   2  310.77   13.22
   0  -4   2  269.21   13.79
   0  -4  -2  276.66   16.77
   0  -4  -2  258.88   13.40
   0  -4  -2  295.08   17.99
   0  -4  -2  262.66   12.84
   0  -4  -2  267.24   14.45
   0  -4   2  260.61   15.85
   0  -4   2  250.70    8.90
   0   4   3   57.24    4.16
   0   4   3   56.63    2.60
   0   4   3   63.46    3.97
   0   4  -3   59.98    4.46
   0   4   3   58.48    5.17
   0   4  -3   78.23    3.86
   0   4   3   53.86    2.29
   0   4  -3   62.84    5.26
   0   4  -3   69.76    4.79
   0  -4   3   66.45    4.38
   0  -4   3   71.59    4.61
   0  -4  -3   60.05    6.04
   0  -4   3   66.98    3.85
   0  -4  -3   59.95    4.46
   0  -4  -3   63.23    5.81
   0  -4   3   64.11    5.08
   0  -4  -3   53.32    4.55
   0   4   4  752.63   50.93
   0   4   4  745.72   41.19
   0   4  -4  738.55   41.03
   0   4   4  711.73   33.97
   0   4   4  817.52   43.69
   0   4  -4  889.23   46.05
   0   4  -4  856.14   47.10
   0   4  -4  786.51   50.97
   0  -4   4  800.28   43.40
   0  -4   4  753.29   40.89
   0  -4  -4  745.79   42.48
   0  -4   4  839.49   47.56
   0  -4  -4  731.98   42.84
   0  -4   4  820.54   44.21
   0  -4  -4  820.68   44.48
   0   4  -5  177.39    8.70
   0   4  -5  159.71    9.35
   0   4   5  152.88    5.34
   0   4   5  142.57    4.63
   0   4   5  153.94    8.46
   0   4  -5  163.94   12.82
   0   4   5  171.76    9.00
   0   4   5  167.66   10.36
   0   4  -5  171.83    8.99
   0  -4   5  175.84    9.30
   0  -4   5  169.06    8.35
   0  -4  -5  176.87    9.01
   0  -4   5  146.69   11.00
   0  -4  -5  147.95    8.75
   0  -4  -5  146.62    9.39
   0  -4   5  152.14    7.80
   0   4   6   77.29    5.02
   0   4  -6   70.33    5.51
   0   4   6   78.08    5.23
   0   4  -6   68.04    5.06
   0   4  -6   77.56    4.61
   0   4  -6   75.16    4.55
   0  -4   6   67.62    5.25
   0  -4   6   62.72    4.01
   0  -4   6   69.07    4.37
   0  -4  -6   70.21    5.78
   0  -4   6   66.27    4.60
   0  -4  -6   77.51    4.80
   0  -4  -6   74.38    5.34
   0   4  -7   44.53    5.41
   0   4   7   43.83    3.70
   0   4   7   44.11    4.06
   0   4  -7   42.75    4.35
   0   4  -7   44.74    3.53
   0  -4   7   43.14    3.06
   0  -4   7   46.01    4.15
   0  -4   7   48.07    3.37
   0  -4  -7   39.19    4.55
   0  -4  -7   39.97    3.30
   0  -4   7   37.57    2.81
   0  -4  -7   42.23    4.04
   0  -4  -7   42.99    3.82
   0   4   8  258.76   13.60
   0   4  -8  245.09   12.98
   0   4   8  261.08   14.55
   0   4  -8  245.06   13.16
   0   4  -8  217.80   14.07
   0  -4   8  238.50   11.57
   0  -4   8  247.30   11.90
   0  -4   8  247.06   18.48
   0  -4  -8  265.08   16.33
   0  -4  -8  267.10   13.22
   0  -4  -8  238.90   17.10
   0  -4  -8  264.21   13.57
   0  -4   8  227.81   11.34
   0   4  -9    1.39    1.43
   0   4   9    1.18    1.05
   0   4   9    0.10    0.93
   0   4  -9   -0.07    0.76
   0  -4   9    0.52    1.01
   0  -4   9    0.08    0.95
   0  -4   9    0.02    0.62
   0  -4  -9   -0.40    0.68
   0  -4  -9    0.08    0.78
   0  -4  -9    0.89    0.99
   0  -4   9    0.77    1.71
   0  -4   9    0.26    0.60
   0  -4  -9   -0.44    1.26
   0   4  10   65.78    6.07
   0   4  10   79.86    5.88
   0   4 -10   74.39    5.64
   0  -4  10   71.94    9.58
   0  -4  10   66.25    6.09
   0  -4 -10   68.75    4.74
   0  -4 -10   66.14    4.62
   0   4  11  129.02    9.14
   0   4  11  123.88    8.68
   0  -4  11  101.80    8.52
   0  -4  11  111.14   13.21
   0  -4 -11  125.29    7.37
   0   4  12   70.39    6.52
   0   4  12   69.85    6.64
   0  -4  12   66.15    7.16
   0  -4  12   59.48    6.37
   0  -4 -12   65.33    5.01
   0   4  13   90.81   12.45
   0   4  13   87.91    8.22
   0  -4  13   84.17    8.64
   0  -4  13   80.90    7.71
   0   4  14   97.02    9.73
   0   4  14  113.01   10.15
   0  -4  14   93.84    8.88
   0  -4  14   90.03    9.78
   0   4  15   34.20    5.70
   0   4  15   34.89    5.94
   0  -4  15   33.79    5.31
   0  -4  15   33.37    6.06
   0   4  16  458.89   38.83
   0   4  16  449.34   30.65
   0  -4  16  415.53   31.24
   0  -4  16  390.32   27.63
   0   4 -17   81.51   10.02
   0   4  17  118.71   10.93
   0  -4  17   99.73   10.92
   0  -4 -17  103.54   11.30
   0   4  18    2.68    2.19
   0   4 -18    2.18    2.33
   0  -4  18    2.33    2.32
   0  -4 -18   -1.89    3.71
   0   4  19    9.75    3.18
   0   4 -19    5.45    3.30
   0  -4  19   10.51    3.35
   0  -4 -19    6.55    3.31
   0   4  20    0.20    1.50
   0   4 -20    0.39    1.63
   0  -4  20    0.61    1.58
   0  -4 -20    0.36    1.59
   0   4  21   88.42    7.81
   0   4 -21   82.33    7.96
   0  -4  21   67.73    7.52
   0  -4 -21   72.74    7.43
   0   4  22    1.65    1.61
   0   4 -22    0.00    1.73
   0  -4  22    1.37    1.59
   0  -4 -22    2.79    1.47
   0   4  23    8.10    2.00
   0   4 -23   -0.02    1.98
   0  -4  23    4.20    1.83
   0  -4 -23    4.55    1.53
   0   6   0    5.28    2.52
   0   6   0    5.11    1.87
   0   6  -1   44.41    4.29
   0   6   1   45.86    4.28
   0   6   1   43.72    5.57
   0   6  -1   42.36    5.46
   0  -6  -1   43.45    4.77
   0  -6   1   38.84    4.48
   0   6  -2   15.13    2.99
   0   6   2   18.69    2.87
   0   6   2   22.24    4.01
   0   6  -2   17.37    5.65
   0  -6  -2   21.74    3.15
   0  -6   2   14.97    2.90
   0   6   3   34.28    2.77
   0   6   3   28.43    3.65
   0   6   3   31.54    5.07
   0   6  -3   29.65    4.57
   0   6  -3   25.84    5.51
   0  -6  -3   25.28    3.80
   0  -6  -3   28.25    4.59
   0  -6   3   29.88    3.78
   0   6  -4  192.86   12.77
   0   6   4  206.19   11.08
   0   6  -4  212.37   14.31
   0   6   4  221.84   16.39
   0   6  -4  205.61   10.66
   0  -6   4  190.08   12.22
   0  -6  -4  213.87   13.87
   0  -6   4  216.94   11.36
   0  -6  -4  194.39   12.63
   0  -6  -4  212.36   14.53
   0   6   5  374.02   22.07
   0   6   5  401.44   21.24
   0   6  -5  396.44   24.85
   0   6  -5  411.58   24.69
   0   6  -5  390.53   20.35
   0  -6   5  338.99   20.80
   0  -6  -5  365.67   24.08
   0  -6  -5  342.77   22.33
   0  -6   5  404.71   22.08
   0  -6  -5  380.86   23.08
   0   6   6  192.38   11.87
   0   6  -6  183.47   12.64
   0   6   6  176.78   10.52
   0   6  -6  170.51   12.29
   0  -6  -6  172.03   11.65
   0  -6   6  177.92   11.15
   0  -6  -6  192.78   13.12
   0  -6   6  154.70   10.26
   0   6   7    3.22    1.75
   0   6   7    2.48    1.50
   0   6  -7    1.64    1.88
   0   6  -7    2.02    2.78
   0  -6  -7    2.43    1.81
   0  -6   7    2.98    1.51
   0  -6  -7    2.21    1.64
   0  -6   7    0.07    2.36
   0   6   8    2.13    1.76
   0   6   8    2.15    1.63
   0   6  -8    1.66    1.80
   0   6  -8    3.79    1.98
   0  -6   8    2.07    2.62
   0  -6  -8    3.03    1.61
   0  -6  -8    2.97    1.82
   0  -6   8    0.01    2.33
   0   6   9   19.68    3.53
   0   6   9   20.44    3.56
   0   6  -9   19.28    3.81
   0  -6   9   20.63    3.52
   0  -6   9   13.35    4.42
   0  -6  -9   15.47    3.50
   0  -6  -9   19.71    4.92
   0   6 -10  459.64   32.91
   0   6  10  537.15   33.79
   0   6  10  533.07   33.19
   0  -6 -10  473.61   31.14
   0  -6 -10  519.86   32.44
   0  -6  10  508.92   34.22
   0   6  11   24.81    4.17
   0   6  11   22.29    4.28
   0   6 -11   19.97    4.32
   0  -6  11   21.26    4.23
   0  -6 -11   21.79    3.50
   0   6  12  169.00   13.41
   0   6  12  174.81   13.24
   0   6 -12  157.04   13.41
   0  -6  12  168.70   13.48
   0  -6 -12  169.13   12.36
   0   6  13    0.94    2.38
   0   6 -13   -0.23    1.48
   0   6  13    0.32    1.42
   0  -6  13    0.32    1.45
   0   6  14   16.11    3.99
   0   6 -14   12.13    3.75
   0  -6  14   15.24    3.79
   0  -6 -14   15.27    4.34
   0   6  15   38.18    6.26
   0   6 -15   38.59    5.76
   0  -6 -15   40.84    6.71
   0  -6  15   37.33    8.75
   0   6 -16    1.19    1.53
   0   6  16    1.16    1.69
   0  -6  16   -1.27    1.42
   0  -6 -16    1.67    2.70
   0   6 -17   50.39    9.65
   0   6  17   60.91    6.95
   0  -6  17   46.85    6.10
   0  -6 -17   50.63    7.07
   0   6  18    9.46    3.00
   0   6 -18    8.94    2.80
   0  -6  18    2.72    4.22
   0  -6 -18   10.65    3.38
   0   6 -19    0.00    1.43
   0   6  19   -0.04    1.48
   0  -6  19   -0.98    1.33
   0  -6 -19   -2.98    2.46
   0   6  20    1.22    1.36
   0   6 -20    0.88    1.32
   0  -6 -20   -0.21    1.41
   0  -6  20    0.87    1.14
   0  -8   0  745.41   62.11
   0  -8   1    5.50    2.99
   0  -8  -1    2.81    2.86
   0   8   2   23.78    4.43
   0   8  -2   39.91    4.59
   0  -8   2   10.42    4.77
   0  -8  -2   10.39    4.97
   0   8   3  223.84   21.40
   0   8  -3  230.84   16.61
   0  -8   3  226.61   17.37
   0  -8  -3  258.87   25.71
   0  -8   3  255.72   18.97
   0  -8  -3  229.65   17.92
   0   8   4   13.26    3.59
   0   8  -4   11.06    3.44
   0  -8   4   11.14    3.63
   0  -8   4   15.94    3.71
   0  -8  -4   16.81    4.07
   0  -8  -4   12.37    3.67
   0   8   5   22.58    3.99
   0   8  -5   20.99    3.89
   0  -8   5   20.20    4.21
   0  -8   5   15.46    3.82
   0  -8  -5   16.29    4.17
   0  -8  -5   19.39    4.49
   0   8   6   47.58    5.88
   0   8  -6   45.53    5.84
   0  -8   6   37.76    8.31
   0  -8   6   50.13    9.28
   0  -8  -6   47.18    9.07
   0  -8  -6   54.59    6.69
   0   8  -7   34.61    4.91
   0   8   7   34.21    7.41
   0  -8   7   34.76    5.05
   0  -8  -7   34.82    5.10
   0  -8  -7   38.83    5.34
   0  -8   7   27.77    4.74
   0   8   8    6.17    2.43
   0   8  -8    5.38    2.48
   0  -8   8    3.66    2.35
   0  -8  -8    7.15    2.57
   0  -8  -8    5.70    2.39
   0   8   9   33.69    4.93
   0   8  -9   31.33    7.42
   0  -8  -9   36.26    4.73
   0  -8  -9   30.25    4.58
   0   8  10   68.86    6.78
   0   8 -10   60.87    6.63
   0  -8 -10   65.27    6.29
   0  -8 -10   49.42    6.61
   0  -8 -10   46.77    5.74
   0   8  11   77.21    7.10
   0   8 -11   64.04    6.72
   0  -8 -11   53.53    9.81
   0  -8 -11   75.56    6.55
   0  -8 -11   45.52    5.84
   0   8 -12    5.99    2.30
   0   8  12    7.55    3.88
   0  -8  12    3.05    1.59
   0  -8 -12    5.22    2.37
   0  -8 -12    4.91    2.06
   0   8  13    1.06    1.92
   0   8 -13    2.45    1.71
   0  -8  13    1.48    1.12
   0  -8 -13    0.31    1.80
   0  -8 -13    2.16    1.50
   0   8  14   11.85    2.77
   0   8 -14    5.67    2.43
   0  -8  14    4.65    1.64
   0  -8 -14    8.48    3.91
   0   8  15   11.68    3.06
   0   8 -15   10.26    2.55
   0  -8 -15   13.13    2.52
   0  -8  15    7.70    1.72
   0   8  16   48.83    4.97
   0   8 -16   35.44    4.14
   0  -8  16   34.38    4.05
   0  -8 -16   39.78    4.41
   0 -10   0   65.64    6.70
   0 -10   1    4.36    2.33
   0 -10  -1    4.66    2.35
   0  10   2   55.03    5.69
   0 -10   2   50.84    5.78
   0 -10  -2   59.22    6.26
   0  10   3   -2.18    1.11
   0  10  -3    0.20    1.05
   0 -10   3    0.36    1.09
   0 -10  -3    1.61    1.22
   0 -10   3   -0.16    1.16
   0  10  -4   -0.10    1.05
   0  10   4    0.42    1.01
   0 -10   4   -0.64    1.00
   0 -10  -4   -0.65    1.24
   0 -10   4    0.98    1.69
   0  10   5    0.10    1.14
   0  10  -5   -0.31    1.11
   0 -10   5   -1.08    1.13
   0 -10  -5    0.76    1.30
   0 -10   5    1.69    1.04
   0  10   6   21.50    2.92
   0  10  -6    0.37    4.37
   0 -10   6    6.34    2.72
   0 -10  -6   24.83    3.37
   0 -10   6   14.59    2.51
   0 -10  -6   16.69    3.12
   0  10   7    2.39    1.35
   0  10  -7   -0.20    1.27
   0 -10   7    1.73    1.13
   0 -10  -7    0.73    1.47
   0 -10  -7    0.22    1.27
   0  10   8   32.60    3.73
   0  10  -8   28.09    3.44
   0 -10  -8   30.43    3.78
   0 -10  -8   27.29    3.62
   0  10   9    1.98    1.26
   0  10  -9    0.15    1.09
   0 -10  -9    2.19    1.25
   0 -10  -9   -0.28    0.77
  -1   1  25  124.04    8.73
  -1  -1  25  121.54    8.76
  -1   1  24   23.72    3.35
  -1  -1  24   13.03    2.52
  -1  -1  24   24.40    3.49
  -1   1  23   50.89    5.40
  -1  -1  23   29.15    4.71
  -1  -1  23   45.16    8.07
  -1   1  22   22.14    3.90
  -1  -1  22    6.44    3.75
  -1  -1  22   21.02    3.83
  -1   1  21   67.77   11.04
  -1  -1  21   75.12    7.54
  -1  -1  21   52.98    7.39
  -1   1  20    0.29    1.42
   1  -1 -20   -0.37    1.76
  -1  -1  20    0.84    2.27
  -1  -1  20   -0.12    2.29
  -1   1  19   60.61    7.05
   1  -1 -19   44.65    6.45
  -1  -1  19   48.45    6.97
  -1  -1  19   63.06    6.88
  -1   1  18    1.21    1.87
  -1   1  18    0.33    1.69
   1  -1 -18    1.98    1.58
  -1  -1  18    2.37    1.84
  -1  -1  18   -0.83    1.91
  -1   1  17    1.43    1.58
  -1   1  17    1.17    1.72
   1  -1 -17    0.14    1.53
  -1  -1  17    1.09    2.76
  -1  -1  17    0.38    1.67
  -1   1  16   10.26    2.67
  -1   1  16    8.61    2.39
  -1   1  16    6.68    2.47
  -1  -1  16    6.22    3.00
  -1  -1  16    8.40    4.32
  -1   1  15  138.63   10.55
  -1   1  15  161.46   15.31
  -1   1  15  161.50   13.60
  -1  -1  15  159.13   11.06
  -1  -1  15  151.54   16.08
  -1   1  14  133.58    9.39
  -1   1  14  133.56    9.45
  -1   1  14  140.25    8.66
  -1  -1  14  137.75   10.32
   1  -1 -14  118.39    6.64
  -1  -1  14  130.51    9.10
   1   1 -13  401.62   22.41
   1   1 -13  409.31   21.13
  -1   1  13  413.07   24.62
  -1   1  13  424.97   22.83
   1   1 -13  431.52   22.20
  -1   1  13  405.31   27.73
  -1  -1  13  420.92   25.77
   1  -1 -13  376.81   21.61
   1  -1 -13  407.33   20.27
  -1  -1  13  420.02   23.81
  -1   1  12   26.64    4.46
   1   1 -12   23.66    2.58
   1   1 -12   19.86    2.13
  -1   1  12   28.45    5.34
   1   1 -12   22.19    2.76
  -1   1  12   23.98    2.89
   1  -1 -12   26.00    2.07
  -1  -1  12   23.34    3.46
   1  -1 -12   24.23    2.86
  -1  -1  12   22.60    3.14
   1   1 -11   25.69    3.05
  -1   1  11   23.75    2.70
   1   1 -11   32.68    2.77
  -1   1  11   30.41    2.99
  -1   1  11   23.69    3.48
   1  -1 -11   27.09    2.10
  -1  -1  11   35.79    3.30
   1  -1 -11   23.94    2.86
   1  -1 -11   26.27    1.35
  -1  -1  11   31.32    2.02
  -1  -1  11   23.77    3.60
   1   1 -10    9.12    0.46
   1   1 -10   12.14    1.90
  -1   1  10    6.79    1.60
  -1   1  10   10.43    2.20
   1   1 -10   17.42    2.74
  -1   1  10    7.85    1.86
   1   1 -10    8.22    0.52
   1  -1 -10    9.20    1.89
   1  -1 -10   11.72    2.86
   1  -1 -10    7.84    0.97
  -1  -1  10   12.41    3.11
  -1  -1  10   10.69    3.61
  -1  -1  10    9.53    0.69
   1  -1 -10    8.24    0.82
   1  -1 -10    8.59    0.61
  -1  -1  10    8.42    1.84
   1   1  -9  168.95    7.49
   1   1  -9  163.44   11.31
   1   1  -9  176.30    6.40
  -1   1   9  183.66    8.65
   1   1  -9  175.35    8.48
  -1   1   9  191.12    6.40
  -1   1   9  186.15    9.68
   1   1  -9  190.51    5.73
  -1   1   9  178.33   11.52
  -1  -1   9  162.46    8.76
   1  -1  -9  189.27    7.81
   1  -1  -9  189.79    7.38
  -1  -1   9  178.66    5.41
   1  -1  -9  167.13    6.45
   1  -1  -9  164.34    8.59
  -1  -1   9  184.28    7.12
  -1  -1   9  160.47    4.78
  -1  -1   9  179.36   10.11
  -1   1   8 1448.06   84.82
   1   1  -8 1444.67   75.19
   1   1  -8 1576.63   89.36
   1   1  -8 1396.45   78.46
  -1   1   8 1375.91   79.55
   1   1  -8 1358.54   80.35
  -1   1   8 1428.92   75.46
   1   1  -8 1540.94   78.11
  -1   1   8 1386.34   82.87
   1  -1  -8 1311.75   84.84
   1  -1  -8 1547.27   81.11
   1  -1  -8 1317.03   77.97
  -1  -1   8 1258.00   63.76
   1  -1  -8 1373.96   75.01
  -1  -1   8 1477.92   75.14
  -1  -1   8 1236.79   74.41
   1  -1  -8 1392.93   73.14
  -1  -1   8 1455.76   89.23
  -1  -1   8 1348.08   75.51
  -1   1   7   15.09    1.29
  -1   1   7   14.75    1.72
   1   1  -7   13.51    1.53
  -1   1   7   15.23    1.67
   1   1  -7   14.28    1.68
   1   1  -7   11.70    1.62
   1   1  -7   14.86    0.71
   1   1  -7   14.26    1.16
  -1   1   7   19.74    1.39
   1  -1  -7   15.68    0.80
  -1  -1   7   13.99    0.75
   1  -1  -7   15.55    0.89
  -1  -1   7   13.84    1.94
   1  -1  -7   13.29    1.80
   1  -1  -7   15.38    1.52
  -1  -1   7   12.58    1.60
   1  -1  -7   16.69    0.98
  -1  -1   7   13.80    0.91
  -1  -1   7   14.20    0.93
   1   1  -6  724.37   31.30
  -1   1   6  697.16   33.13
   1   1  -6  748.93   32.12
   1   1  -6  620.19   31.00
   1   1  -6  802.16   40.64
  -1   1   6  725.79   30.64
   1   1  -6  840.70   33.54
  -1   1   6  706.35   37.68
  -1   1   6  718.08   32.11
   1  -1  -6  709.52   35.43
  -1  -1   6  684.63   28.32
   1  -1  -6  633.25   30.54
   1  -1  -6  734.14   31.12
  -1  -1   6  777.93   38.38
   1  -1  -6  678.77   28.97
  -1  -1   6  628.50   34.08
  -1  -1   6  703.20   29.22
  -1  -1   6  731.99   30.16
   1  -1  -6  633.99   26.90
   1   1  -5    9.10    1.92
   1   1  -5    9.64    1.06
   1   1  -5   16.08    1.07
   1   1  -5    8.84    1.00
  -1   1   5   18.95    2.99
   1   1  -5   10.17    3.32
  -1   1   5   15.36    2.21
  -1   1   5   17.21    1.30
  -1   1   5   18.69    1.29
   1  -1  -5   18.24    1.09
   1  -1  -5   16.87    1.83
   1  -1  -5   12.14    2.38
  -1  -1   5   12.62    1.52
  -1  -1   5    8.86    1.59
  -1  -1   5    7.88    1.35
  -1  -1   5   10.23    2.34
   1  -1  -5   16.40    1.34
  -1  -1   5    9.16    1.95
   1   1  -4  896.69   45.64
   1   1  -4  947.79   44.44
   1   1  -4  967.21   44.75
  -1   1   4 1022.53   47.96
   1   1  -4  975.75   42.93
  -1   1   4 1049.25   50.72
  -1   1   4 1031.28   53.27
   1   1  -4  915.90   48.48
  -1   1   4 1094.36   48.67
  -1   1   4 1029.80   50.78
   1  -1  -4  958.03   51.22
   1  -1  -4  997.70   46.43
  -1  -1   4  957.48   41.23
  -1  -1   4  990.93   52.39
   1  -1  -4 1005.54   49.74
  -1  -1   4  911.69   46.64
  -1  -1   4  946.49   43.58
  -1  -1   4  935.24   43.30
   1   1  -3 1610.75   85.29
  -1   1   3 1447.26   78.00
  -1   1   3 1487.84   77.27
   1   1  -3 1417.14   73.10
   1   1  -3 1480.29   74.43
  -1   1   3 1514.59   77.01
  -1   1   3 1392.91   66.61
   1   1  -3 1437.68   67.43
  -1   1   3 1360.05   72.40
   1   1  -3 1377.95   72.00
   1  -1  -3 1410.01   76.93
  -1  -1   3 1407.77   73.71
   1  -1  -3 1260.14   62.11
   1  -1  -3 1453.99   75.58
   1  -1  -3 1413.40   71.34
  -1  -1   3 1350.48   68.57
  -1  -1   3 1403.60   76.50
   1  -1  -3 1383.69   74.52
  -1  -1   3 1515.36   76.81
   1   1  -2  399.23   13.46
   1   1  -2  419.93   14.71
   1   1  -2  360.27   12.65
  -1   1   2  407.11   14.03
  -1   1   2  350.55   10.26
  -1   1   2  376.80   13.92
   1   1  -2  364.47   13.54
  -1   1   2  400.49   13.78
  -1   1   2  356.79   15.22
  -1   1   2  405.00   11.55
  -1  -1   2  368.00   12.95
   1  -1  -2  402.54   13.83
  -1  -1   2  385.64   13.05
  -1  -1   2  376.74   14.72
   1  -1  -2  376.42   12.90
   1  -1  -2  371.60   13.96
   1  -1  -2  372.23   14.18
  -1  -1   2  408.97   14.76
   1   1  -1  159.36    4.55
   1   1  -1  157.43    5.11
  -1   1   1  146.35    4.36
  -1   1   1  144.36    4.34
   1   1  -1  142.14    4.62
  -1   1   1  139.69    4.81
  -1   1   1  145.72    3.30
  -1   1   1  135.74    4.69
   1   1  -1  142.36    4.92
   1   1  -1  148.02    4.38
   1  -1  -1  137.18    4.79
  -1  -1   1  138.54    3.18
   1  -1  -1  140.42    3.07
   1  -1  -1  131.20    4.01
   1  -1  -1  146.07    5.13
  -1  -1   1  152.33    5.66
  -1  -1   1  155.50    4.42
   1  -1  -1  143.37    4.35
  -1  -1   1  157.74    4.47
  -1   1   0  410.61   13.09
  -1   1   0  437.69   14.37
   1   1   0  373.19   13.76
  -1   1   0  429.48   14.46
   1   1   0  378.36   12.28
   1   1   0  373.91   12.84
   1   1   0  392.38   12.61
   1   1   0  367.79   12.42
  -1   1   0  406.19   14.85
   1  -1   0  425.67   14.56
   1  -1   0  415.57   14.86
   1  -1   0  384.86   14.15
  -1  -1   0  356.82   12.29
   1  -1   0  401.52   12.92
  -1  -1   0  430.35   13.88
  -1  -1   0  334.26   11.47
  -1  -1   0  358.74   13.60
   1  -1   0  432.58   14.29
  -1  -1   0  393.24   12.26
   1  -1   0  391.66   12.49
   1   1   1 1663.28   85.29
   1   1   1 1714.13   92.53
   1   1   1 1685.10   87.00
   1   1   1 1866.94  102.44
  -1   1  -1 1724.11   87.88
  -1   1  -1 1603.60   87.33
  -1   1  -1 1927.88  102.07
  -1   1  -1 1861.89  101.03
   1   1   1 1737.51   94.50
  -1   1  -1 1779.35   98.74
   1   1   1 1749.63   93.72
   1  -1   1 1678.63   92.95
   1  -1   1 1830.79   98.70
  -1  -1  -1 1799.88   98.04
   1  -1   1 1862.95  102.04
   1  -1   1 1450.40   73.03
   1  -1   1 1663.32   88.63
  -1  -1  -1 1660.54   89.19
  -1  -1  -1 1738.98   97.33
  -1  -1  -1 1764.19   95.99
   1   1   2  301.02   10.21
  -1   1  -2  246.39    6.94
   1   1   2  245.49    7.65
  -1   1  -2  280.35   10.01
  -1   1  -2  274.44    9.80
  -1   1  -2  267.06    9.83
   1   1   2  296.47   10.54
  -1   1  -2  280.38    9.04
   1  -1   2  264.42    9.39
  -1  -1  -2  300.35   11.20
  -1  -1  -2  316.48   10.07
  -1  -1  -2  291.09    9.89
   1  -1   2  265.15    9.46
  -1  -1  -2  279.88   10.67
   1  -1   2  260.08    9.76
   1  -1   2  253.48    9.38
  -1  -1  -2  273.60    9.55
  -1  -1  -2  296.57   10.35
   1   1   3   64.56    6.11
  -1   1  -3   55.30    3.42
   1   1   3   63.33    2.43
  -1   1  -3   65.26    2.51
   1   1   3   73.01    3.52
  -1   1  -3   54.26    3.44
  -1   1  -3   54.41    3.02
   1  -1   3   55.94    3.84
   1  -1   3   58.98    2.82
  -1  -1  -3   59.25    2.46
  -1  -1  -3   69.64    3.28
   1  -1   3   49.85    3.49
   1  -1   3   49.45    2.98
  -1  -1  -3   61.26    4.25
  -1  -1  -3   65.91    3.39
  -1  -1  -3   73.78    2.77
   1   1   4   11.49    1.25
  -1   1  -4    8.45    1.10
  -1   1  -4    7.41    1.91
  -1   1  -4    6.11    2.23
   1   1   4    9.40    2.14
   1   1   4   20.20    2.92
  -1   1  -4    6.96    1.83
  -1  -1  -4   11.84    1.73
   1  -1   4    7.26    1.16
  -1  -1  -4    6.33    3.74
   1  -1   4    7.40    2.15
  -1  -1  -4    8.95    1.75
  -1  -1  -4   10.81    1.42
   1  -1   4    5.25    1.96
  -1  -1  -4   10.92    1.24
  -1   1  -5  370.11   13.78
  -1   1  -5  371.79   14.32
   1   1   5  344.05   15.05
   1   1   5  382.18   16.74
  -1   1  -5  392.29   16.28
  -1   1  -5  322.45   15.02
   1   1   5  327.94   13.25
  -1   1  -5  417.38   13.35
  -1  -1  -5  371.26   17.18
   1  -1   5  369.82   16.92
   1  -1   5  363.14   13.23
   1  -1   5  314.81   14.66
   1  -1   5  370.09   12.17
  -1  -1  -5  327.39   12.86
  -1  -1  -5  356.12   15.32
  -1  -1  -5  381.99   13.98
  -1  -1  -5  395.19   14.86
   1   1   6  131.38    5.97
   1   1   6  126.40    5.83
  -1   1  -6  116.95    5.90
  -1   1  -6  143.75    4.18
   1   1   6  124.02    6.11
  -1   1  -6  122.20    5.37
  -1   1  -6  119.29    4.41
   1  -1   6  111.63    7.52
   1  -1   6  132.92    3.61
   1  -1   6  131.01    6.47
  -1  -1  -6  140.61    4.84
  -1  -1  -6  122.72    3.61
   1  -1   6  134.58    4.43
  -1  -1  -6  131.82    4.75
   1  -1   6  118.41    4.22
  -1  -1  -6  133.41    3.83
  -1  -1  -6  119.01    6.25
  -1  -1  -6  122.99    5.56
   1   1   7  175.04    7.54
   1   1   7  180.79    8.62
   1   1   7  184.16    8.35
  -1   1  -7  172.05    7.33
  -1   1  -7  179.24    8.59
  -1   1  -7  187.39    8.07
  -1   1  -7  199.08    5.54
   1  -1   7  189.39    5.41
   1  -1   7  166.92    5.70
   1  -1   7  183.81    9.13
   1  -1   7  163.85    8.00
   1  -1   7  178.21    6.56
  -1  -1  -7  175.36    5.86
  -1  -1  -7  173.04    6.80
  -1  -1  -7  198.05    5.83
  -1  -1  -7  156.03    7.58
  -1  -1  -7  172.19    8.79
  -1  -1  -7  170.76    6.33
   1   1   8 1866.64  119.27
   1   1   8 1751.89  111.63
  -1   1  -8 1752.53  114.67
   1   1   8 2053.17  135.94
  -1   1  -8 1762.87  105.60
  -1   1  -8 1865.68  114.07
  -1   1  -8 1810.13  114.58
   1  -1   8 1946.31  101.69
  -1  -1  -8 1757.41   97.92
   1  -1   8 1819.63  121.24
   1  -1   8 1890.60   97.88
   1  -1   8 1654.10   96.02
  -1  -1  -8 1606.83  105.43
  -1  -1  -8 1872.81  104.23
  -1  -1  -8 1769.51  108.02
   1  -1   8 1616.33  111.20
  -1  -1  -8 1822.58  112.36
   1   1   9    2.42    1.09
  -1   1  -9    0.63    0.64
   1   1   9    0.78    0.94
   1   1   9    1.39    0.82
  -1   1  -9    2.23    0.98
  -1   1  -9    0.54    0.45
  -1   1  -9    1.66    0.87
   1  -1   9    0.86    1.12
   1  -1   9    0.74    1.03
  -1  -1  -9    0.69    0.31
   1  -1   9   -0.05    0.33
  -1  -1  -9   -0.06    0.47
   1   1  10   -0.48    0.81
   1   1  10    0.43    0.75
   1   1  10   -0.98    0.99
  -1   1 -10    0.15    0.36
  -1   1 -10    1.62    0.73
  -1   1 -10    1.02    0.87
   1  -1  10    0.02    0.29
   1  -1  10    0.15    1.01
  -1  -1 -10    0.28    0.59
  -1  -1 -10    1.79    1.28
   1  -1  10   -0.82    0.91
  -1  -1 -10   -0.17    0.64
   1   1  11   47.79    3.91
   1   1  11   43.43    4.57
   1   1  11   46.13    5.64
  -1   1 -11   47.75    4.12
  -1   1 -11   38.82    2.94
  -1   1 -11   51.54    5.31
  -1  -1 -11   43.50    2.95
   1  -1  11   44.53    4.66
  -1  -1 -11   42.06    3.76
   1  -1  11   45.01    4.11
  -1   1 -12  321.48   16.21
   1   1  12  350.83   18.54
   1   1  12  307.81   18.25
   1   1  12  330.40   19.58
  -1   1 -12  312.87   16.50
  -1   1 -12  316.40   17.76
   1  -1  12  305.10   19.45
   1  -1  12  317.21   18.26
  -1  -1 -12  306.66   15.21
  -1  -1 -12  303.19   17.13
  -1   1 -13  203.89   11.42
   1   1  13  227.90   16.56
   1   1  13  208.56   13.49
   1   1  13  202.57   13.34
  -1   1 -13  223.46   12.07
   1  -1  13  203.90   14.46
   1  -1  13  213.88   13.23
  -1  -1 -13  201.49   10.58
   1   1  14   56.24    6.05
   1   1  14   68.78    9.13
   1   1  14   70.65    5.64
   1  -1  14   65.08    6.02
   1  -1  14   59.09    6.63
   1   1  15    2.37    1.85
   1   1  15    2.76    1.97
   1  -1  15    3.14    1.93
   1  -1  15    1.24    2.14
  -1  -1 -15    2.61    1.80
   1   1  16    2.17    1.83
   1   1  16    1.89    2.04
   1  -1  16    1.81    2.01
   1  -1  16    1.40    2.20
  -1  -1 -16    3.29    2.92
   1   1  17   90.85    8.61
   1   1  17   72.80    8.34
   1  -1  17   88.80    8.29
   1  -1  17   74.33    8.93
  -1  -1 -17   83.79    7.86
   1   1  18    4.80    2.58
   1   1  18    1.78    2.39
   1  -1  18    5.25    2.56
   1  -1  18    4.24    2.65
  -1  -1 -18    3.90    2.32
   1   1  19   31.16    5.01
   1  -1  19   30.74    4.83
   1  -1  19   20.75    5.02
  -1  -1 -19   23.49    4.05
   1   1  20   78.69    7.91
   1  -1  20   79.99    8.04
   1  -1  20   56.27    8.23
   1   1  21   11.55    3.19
   1  -1  21    6.04    3.06
   1  -1  21    9.03    5.01
   1   1  22   16.32    3.45
   1  -1  22   15.98    3.49
   1  -1  22    7.07    3.24
   1   1  23   -0.20    1.04
   1  -1  23   -0.31    0.87
   1  -1  23    0.78    1.07
   1   1  24   39.71    4.49
   1  -1  24   41.11    4.62
   1   3 -24    0.01    1.83
  -1   3  24    3.97    1.65
  -1  -3  24    2.90    1.45
   1   3 -23   -0.00    1.99
  -1   3  23    0.26    1.14
   1  -3 -23    0.66    1.34
  -1  -3  23   -1.02    1.09
   1   3 -22   25.70    4.69
  -1   3  22   29.55    4.48
   1  -3 -22   22.32    3.70
  -1  -3  22   26.86    4.55
  -1   3  21    2.70    2.23
   1  -3 -21   -0.29    2.10
  -1  -3  21    4.70    2.12
  -1  -3  21    2.55    2.24
  -1   3  20   22.93    4.51
   1  -3 -20   19.89    6.90
  -1  -3  20   19.87    4.84
  -1  -3  20   23.35    4.53
  -1   3  19   66.73    7.35
  -1  -3  19   62.21    7.25
   1  -3 -19   58.51    7.56
  -1  -3  19   52.00    7.75
  -1   3  18   12.91    3.70
   1  -3 -18    8.87    3.75
  -1  -3  18   10.82    3.44
  -1  -3  18   10.04    3.85
  -1   3  17  305.29   21.05
  -1   3  17  299.36   21.22
  -1  -3  17  253.92   21.42
  -1  -3  17  288.50   26.13
  -1   3  16   17.91    6.58
  -1   3  16   21.39    4.60
  -1  -3  16   16.68    4.68
  -1  -3  16   20.02    4.20
  -1   3  15  189.08   14.66
  -1   3  15  195.55   13.92
  -1  -3  15  174.72   15.02
  -1  -3  15  159.84   12.73
  -1   3  14  144.09   10.91
  -1   3  14  141.09   10.56
  -1  -3  14  116.45    9.68
  -1  -3  14  119.28   11.03
  -1   3  13    4.54    2.11
  -1   3  13    4.43    2.18
  -1  -3  13    2.11    2.42
  -1  -3  13    5.27    2.02
  -1   3  12  466.35   26.80
  -1   3  12  476.69   32.35
  -1  -3  12  407.60   32.49
  -1  -3  12  365.16   22.82
  -1   3  11    5.59    1.85
  -1   3  11    6.38    3.10
   1   3 -11    4.89    1.71
   1  -3 -11    5.28    1.71
   1  -3 -11    6.04    2.34
  -1  -3  11    5.46    2.21
   1  -3 -11    2.79    1.01
   1  -3 -11    6.45    1.83
  -1  -3  11    5.12    1.82
   1   3 -10   40.19    3.54
  -1   3  10   37.43    3.98
  -1   3  10   33.39    3.62
   1  -3 -10   36.39    2.60
   1  -3 -10   31.79    3.36
   1  -3 -10   32.15    3.54
  -1  -3  10   37.08    4.33
  -1  -3  10   32.13    3.72
   1  -3 -10   29.02    6.90
  -1  -3  10   35.84    3.25
  -1  -3  10   35.13    3.02
  -1   3   9 2064.98  134.22
  -1   3   9 2310.07  168.16
   1   3  -9 2207.35  152.44
  -1   3   9 2263.28  156.94
  -1   3   9 1902.88  119.82
   1  -3  -9 2127.52  144.27
   1  -3  -9 2066.20  145.95
  -1  -3   9 1992.17  149.13
   1  -3  -9 2241.27  150.31
  -1  -3   9 2117.70  139.79
  -1  -3   9 1998.23  130.45
   1  -3  -9 2046.08  154.10
  -1  -3   9 1977.33  141.62
  -1  -3   9 2081.86  137.65
   1   3  -8  601.50   30.92
  -1   3   8  554.36   22.67
  -1   3   8  600.96   32.43
   1   3  -8  594.07   27.77
  -1   3   8  543.08   24.05
  -1   3   8  614.74   31.21
   1  -3  -8  586.47   34.13
   1  -3  -8  566.39   28.47
  -1  -3   8  531.17   33.41
   1  -3  -8  571.39   30.37
  -1  -3   8  585.50   33.34
   1  -3  -8  586.34   31.38
  -1  -3   8  558.52   26.28
  -1  -3   8  544.36   26.20
   1   3  -7  162.13    7.20
  -1   3   7  165.79    5.88
  -1   3   7  161.88    8.45
   1   3  -7  163.70    8.83
  -1   3   7  166.48   12.44
  -1   3   7  165.35    5.74
  -1  -3   7  158.32   12.74
   1  -3  -7  190.08   11.34
  -1  -3   7  167.88    7.51
   1  -3  -7  162.13    8.95
   1  -3  -7  169.66   10.36
  -1  -3   7  156.09    8.74
   1  -3  -7  173.59    8.08
  -1  -3   7  169.45    7.35
   1   3  -6  270.24   16.46
  -1   3   6  282.06   13.31
   1   3  -6  296.50   12.46
   1   3  -6  271.32   15.09
  -1   3   6  291.45   14.68
  -1   3   6  267.40    9.37
  -1   3   6  296.20   14.58
  -1   3   6  268.17    9.63
   1  -3  -6  290.57   13.15
   1  -3  -6  287.41   15.26
   1  -3  -6  292.04   13.91
  -1  -3   6  275.36   14.43
  -1  -3   6  255.07   13.68
  -1  -3   6  243.38   10.90
  -1  -3   6  272.38   16.49
  -1   3   5   40.01    3.18
  -1   3   5   46.77    1.49
   1   3  -5   47.88    3.25
   1   3  -5   50.55    4.89
  -1   3   5   44.81    3.43
  -1   3   5   52.10    3.80
   1  -3  -5   48.12    3.14
  -1  -3   5   54.50    3.29
  -1  -3   5   50.32    2.76
  -1  -3   5   55.22    3.45
   1  -3  -5   47.74    3.80
  -1  -3   5   48.23    3.48
   1  -3  -5   44.35    3.44
   1   3  -4   18.79    2.16
   1   3  -4    7.97    2.57
   1   3  -4    8.08    1.64
  -1   3   4    9.58    0.43
   1   3  -4    7.48    1.31
   1   3  -4    8.94    1.41
  -1   3   4   10.55    0.54
  -1   3   4   10.16    1.82
  -1   3   4   11.37    1.46
  -1   3   4    9.59    1.51
   1  -3  -4    9.97    1.67
   1  -3  -4   10.85    1.44
  -1  -3   4    9.07    1.49
  -1  -3   4    7.91    1.29
   1  -3  -4   10.91    1.65
  -1  -3   4    6.94    2.59
   1   3  -3 1684.02  100.77
  -1   3   3 1596.98   96.21
   1   3  -3 1631.97   99.22
   1   3  -3 1692.57  101.03
   1   3  -3 1606.69  101.58
   1   3  -3 1526.95   93.21
  -1   3   3 1704.67  101.86
  -1   3   3 1618.52   85.05
  -1   3   3 1639.51   88.53
  -1   3   3 1681.11  106.00
   1  -3  -3 1696.96  101.88
   1  -3  -3 1685.21  103.93
   1  -3  -3 1676.77  102.27
  -1  -3   3 1523.32   97.45
  -1  -3   3 1658.65   99.41
  -1  -3   3 1502.75   91.97
   1  -3  -3 1648.79  106.45
   1   3  -2 1244.84   67.58
   1   3  -2 1156.92   62.45
  -1   3   2 1197.31   64.74
   1   3  -2 1158.53   66.94
   1   3  -2 1139.40   62.84
  -1   3   2 1194.90   63.62
  -1   3   2 1171.61   57.55
   1   3  -2 1207.60   65.58
  -1   3   2 1121.92   66.28
   1  -3  -2 1189.41   66.29
   1  -3  -2 1128.03   67.62
  -1  -3   2 1126.56   60.72
   1  -3  -2 1090.20   63.37
   1  -3  -2 1126.75   62.14
   1  -3  -2 1230.33   67.01
  -1  -3   2 1186.35   64.84
  -1  -3   2 1203.83   57.68
  -1  -3   2 1161.11   68.09
   1   3  -1 1697.53  104.29
   1   3  -1 1826.04  109.84
   1   3  -1 1739.63  109.60
   1   3  -1 1776.04  113.25
  -1   3   1 1675.43  101.94
  -1   3   1 1795.53  104.78
  -1   3   1 1565.39  108.20
   1  -3  -1 1728.73  117.56
   1  -3  -1 1649.27  101.61
   1  -3  -1 1669.56  100.34
   1  -3  -1 1686.75  105.42
   1  -3  -1 1717.81   94.57
  -1  -3   1 1727.75  112.16
  -1  -3   1 1781.98  103.18
   1  -3  -1 1742.41  106.53
  -1  -3   1 1748.02  107.13
  -1  -3   1 1754.24  100.00
  -1  -3   1 1757.89  106.76
   1   3   0  189.46    7.57
  -1   3   0  225.08   11.30
   1   3   0  234.95    9.65
  -1   3   0  225.58    9.82
  -1   3   0  215.76    9.53
   1   3   0  212.47   10.85
  -1   3   0  220.85    7.72
  -1   3   0  232.56    9.40
   1  -3   0  219.01    8.03
   1  -3   0  226.99    9.72
   1  -3   0  212.71   11.12
  -1  -3   0  216.37    9.53
  -1  -3   0  219.33   10.11
   1  -3   0  208.65    7.62
  -1  -3   0  212.05    9.66
   1  -3   0  209.60    9.44
  -1  -3   0  229.56    8.78
  -1  -3   0  210.54    8.26
  -1  -3   0  219.75   11.44
  -1   3  -1  633.55   29.40
   1   3   1  592.04   27.49
   1   3   1  608.60   31.04
  -1   3  -1  613.70   29.27
  -1   3  -1  591.14   23.60
   1   3   1  600.40   25.85
  -1   3  -1  584.32   30.43
  -1   3  -1  597.73   28.51
   1  -3   1  607.36   27.10
   1  -3   1  596.63   28.58
  -1  -3  -1  602.60   28.94
   1  -3   1  629.51   29.33
  -1  -3  -1  606.89   27.99
  -1  -3  -1  572.36   35.48
   1  -3   1  593.08   23.73
   1  -3   1  615.28   31.75
  -1  -3  -1  592.70   28.21
  -1  -3  -1  610.95   29.60
  -1   3  -2 1422.58   86.77
  -1   3  -2 1390.00   85.97
   1   3   2 1500.77   85.85
   1   3   2 1426.56   74.82
   1   3   2 1388.07   85.71
   1   3   2 1291.05   72.52
  -1   3  -2 1400.31   80.49
   1   3   2 1516.35   88.97
  -1   3  -2 1608.15   80.76
  -1   3  -2 1403.59   83.57
   1  -3   2 1551.94   77.10
   1  -3   2 1443.51   83.59
   1  -3   2 1504.02   92.31
   1  -3   2 1424.58   83.28
  -1  -3  -2 1495.88   93.95
  -1  -3  -2 1477.71   87.37
   1  -3   2 1495.61   85.88
  -1  -3  -2 1377.26   82.14
  -1  -3  -2 1482.54   85.64
   1   3   3  910.75   50.04
   1   3   3  883.32   42.14
   1   3   3  870.16   47.95
  -1   3  -3  862.83   45.55
  -1   3  -3  962.25   50.76
   1   3   3  937.66   48.16
   1   3   3  792.42   36.06
  -1   3  -3  906.06   49.90
  -1   3  -3  918.11   46.85
   1  -3   3  914.98   46.50
   1  -3   3  885.98   45.56
  -1  -3  -3  891.43   55.82
  -1  -3  -3  869.49   46.36
   1  -3   3  990.71   51.00
  -1  -3  -3  834.64   45.94
   1  -3   3  947.28   54.90
  -1  -3  -3  963.06   48.66
   1   3   4   32.53    1.85
   1   3   4   41.15    2.69
   1   3   4   40.44    3.32
  -1   3  -4   36.49    2.56
  -1   3  -4   33.70    3.21
  -1   3  -4   37.91    4.31
   1   3   4   40.83    2.85
  -1   3  -4   35.28    3.06
   1   3   4   34.73    1.31
   1  -3   4   35.84    3.43
   1  -3   4   34.86    2.39
  -1  -3  -4   42.54    3.78
  -1  -3  -4   43.45    2.96
  -1  -3  -4   37.63    3.21
   1  -3   4   40.79    2.84
   1  -3   4   35.14    2.95
   1   3   5    7.97    0.65
   1   3   5    7.70    1.50
  -1   3  -5   10.45    1.57
   1   3   5    8.17    1.68
  -1   3  -5    7.66    2.24
   1   3   5    6.78    0.63
  -1   3  -5   10.10    1.61
   1  -3   5    9.40    1.22
   1  -3   5    8.10    1.13
   1  -3   5    9.35    1.40
  -1  -3  -5    6.23    2.07
  -1  -3  -5    7.55    2.56
   1  -3   5    9.20    1.70
  -1  -3  -5    8.91    1.62
  -1  -3  -5    7.89    1.89
   1  -3   5    9.60    1.70
   1   3   6 1504.90   91.59
   1   3   6 1319.32   70.96
  -1   3  -6 1362.34   84.21
   1   3   6 1353.34   73.50
  -1   3  -6 1570.90   93.16
  -1   3  -6 1353.40   83.20
   1   3   6 1363.34   82.51
   1  -3   6 1493.16   99.36
   1  -3   6 1446.58   86.68
  -1  -3  -6 1510.71   91.05
   1  -3   6 1479.69   86.81
  -1  -3  -6 1329.53   82.56
  -1  -3  -6 1467.34   85.83
   1  -3   6 1387.99   86.12
  -1  -3  -6 1405.99   91.63
   1  -3   6 1296.63   75.58
  -1   3  -7   10.41    1.58
   1   3   7    8.56    0.78
   1   3   7    8.79    0.93
   1   3   7   14.05    2.11
  -1   3  -7    8.86    1.91
   1   3   7   10.52    1.81
  -1   3  -7    9.96    1.78
   1  -3   7    8.38    1.13
   1  -3   7    8.36    2.26
   1  -3   7   12.36    2.04
  -1  -3  -7   11.06    1.87
   1  -3   7   10.82    2.03
  -1  -3  -7   11.42    1.37
  -1  -3  -7   12.64    2.41
  -1  -3  -7    9.08    1.61
   1  -3   7    8.50    1.19
  -1   3  -8  774.31   44.77
   1   3   8  705.20   35.59
   1   3   8  790.08   39.57
   1   3   8  862.29   48.89
   1   3   8  846.76   46.76
  -1   3  -8  804.56   43.53
  -1   3  -8  930.59   54.11
   1  -3   8  805.24   48.75
   1  -3   8  684.90   37.21
   1  -3   8  793.30   40.48
   1  -3   8  769.58   40.55
   1  -3   8  770.77   44.56
  -1  -3  -8  823.75   50.49
  -1  -3  -8  813.98   45.38
  -1  -3  -8  922.92   50.86
  -1  -3  -8  915.80   48.50
   1   3   9   49.01    4.42
   1   3   9   61.66    4.82
   1   3   9   48.68    3.95
   1   3   9   45.85    2.22
  -1   3  -9   58.18    4.27
  -1   3  -9   59.30    7.09
  -1   3  -9   52.82    3.33
   1  -3   9   54.36    3.60
   1  -3   9   56.35    5.20
   1  -3   9   53.14    4.62
   1  -3   9   56.63    2.81
  -1  -3  -9   55.97    8.21
  -1  -3  -9   48.34    4.26
  -1  -3  -9   47.58    4.72
  -1  -3  -9   50.07    2.90
   1  -3   9   55.85    2.63
   1   3  10   19.80    3.24
   1   3  10   20.27    2.92
  -1   3 -10   20.17    2.70
  -1   3 -10   21.06    3.13
   1  -3  10   18.71    3.03
  -1  -3 -10   18.38    3.73
  -1  -3 -10   21.27    4.33
   1  -3  10   19.91    5.46
  -1  -3 -10   19.47    2.06
  -1   3 -11    1.22    1.14
   1   3  11    2.09    2.17
  -1   3 -11    2.65    1.36
   1   3  11   -0.57    1.36
   1  -3  11    1.14    1.53
  -1  -3 -11    0.34    0.85
   1  -3  11    0.81    1.30
  -1  -3 -11    1.29    1.85
  -1  -3 -11    0.44    1.57
   1   3  12  287.09   17.83
   1   3  12  299.18   18.05
   1  -3  12  272.20   19.04
   1  -3  12  256.93   16.71
   1   3  13  144.05   10.66
   1   3  13  136.20   10.41
   1  -3  13  116.07   11.03
   1  -3  13  120.95    9.73
   1   3  14   41.29    5.81
   1   3  14   40.66    5.45
   1  -3  14   33.96    5.26
   1  -3  14   36.60    6.13
   1   3  15    5.93    3.00
   1   3  15    5.29    2.73
   1  -3  15    4.12    3.11
   1  -3  15    5.97    2.65
   1   3  16   53.10    9.80
   1  -3  16   51.34    9.90
   1  -3  16   48.87   11.22
  -1  -3 -16   43.56    6.91
   1   3  17   35.68    5.92
   1  -3  17   29.76    6.10
   1  -3  17   35.65    5.56
  -1  -3 -17   39.12    5.98
   1   3  18  368.95   24.74
   1  -3  18  347.65   24.53
   1  -3  18  312.87   33.27
  -1  -3 -18  328.52   25.23
   1   3  19   63.13    7.00
   1  -3  19   45.30    7.53
   1  -3  19   56.22   10.55
  -1  -3 -19   53.90    7.06
   1   3  20   51.89    6.24
   1  -3  20   36.17    6.18
   1  -3  20   48.73    6.15
  -1  -3 -20   42.77    5.85
   1   3  21    0.17    1.42
  -1   3 -21    0.02    1.58
   1  -3  21   -0.98    1.43
  -1  -3 -21   -0.32    1.86
   1   3  22    1.63    2.37
  -1   3 -22   -0.01    1.64
   1  -3  22    1.60    1.54
  -1  -3 -22    0.31    1.07
  -1   3 -23   22.48    3.72
   1   3  23   23.16    3.48
   1  -3  23   19.52    3.21
   1   5 -22    0.00    2.73
  -1   5  22    1.18    1.75
  -1  -5  22    2.85    1.60
   1  -5 -22    5.20    1.74
   1   5 -21   55.46    6.10
  -1   5  21   66.71    6.19
  -1  -5  21   50.22    5.63
   1  -5 -21   63.94    6.32
   1   5 -20   -1.22    1.44
  -1   5  20    0.14    1.47
  -1  -5  20    0.05    1.41
   1  -5 -20   -0.50    1.62
   1   5 -19  238.56   18.12
  -1   5  19  268.54   18.58
   1  -5 -19  250.77   19.48
  -1  -5  19  232.23   24.34
   1   5 -18   21.46    4.65
  -1   5  18   28.34    7.79
   1  -5 -18   28.66    8.34
  -1  -5  18   23.12    4.87
   1   5 -17  216.06   17.67
  -1   5  17  248.58   25.00
   1  -5 -17  236.54   19.51
  -1  -5  17  216.37   17.70
   1   5 -16   97.46   10.53
  -1   5  16  124.08   10.93
  -1   5  16  121.37   11.47
  -1  -5  16  106.38   11.21
   1   5 -15   47.93    6.90
  -1   5  15   54.43    7.34
  -1   5  15   57.68    7.18
  -1  -5  15   50.84    7.17
   1   5 -14   97.35   10.40
  -1   5  14  129.55   10.90
  -1   5  14  133.30   11.35
  -1  -5  14  109.78   10.73
   1   5 -13   54.91    7.10
  -1   5  13   68.69    7.01
  -1   5  13   64.82    7.17
  -1  -5  13   53.00    7.19
  -1   5  12   41.10    5.44
   1   5 -12   37.40    5.57
  -1   5  12   44.94    5.42
  -1  -5  12   38.98    8.48
   1  -5 -12   43.74    4.41
   1   5 -11    1.45    1.95
  -1   5  11    2.35    1.79
  -1   5  11    1.47    1.70
   1  -5 -11    1.88    1.40
   1  -5 -11    1.96    2.11
  -1  -5  11    4.10    3.00
  -1   5  10    0.63    1.55
   1   5 -10    0.17    1.64
  -1   5  10    0.97    2.41
  -1  -5  10    2.17    2.44
   1  -5 -10    1.27    1.26
   1  -5 -10    1.95    1.15
   1   5  -9  121.50    9.06
  -1   5   9  129.69    8.38
  -1   5   9  121.33    8.69
   1  -5  -9  128.98    8.33
   1  -5  -9  129.25    8.12
  -1  -5   9  115.96    7.06
  -1  -5   9  119.62    8.95
  -1  -5   9  111.05    7.17
  -1   5   8   47.67    4.35
   1   5  -8   47.58    4.38
   1   5  -8   46.04    3.98
  -1   5   8   49.71    4.58
   1   5  -8   43.09    4.91
   1  -5  -8   47.33    4.06
  -1  -5   8   44.45    3.80
  -1  -5   8   42.73    3.81
   1  -5  -8   51.54    4.72
  -1  -5   8   44.05    3.92
  -1  -5   8   46.86    4.62
   1  -5  -8   48.81    5.35
   1   5  -7    1.66    2.17
   1   5  -7    1.44    1.17
  -1   5   7    4.14    1.43
   1   5  -7    1.55    1.52
  -1   5   7    2.42    1.44
   1  -5  -7    2.37    1.31
   1  -5  -7    1.22    1.56
  -1  -5   7    2.73    2.03
   1  -5  -7    3.28    2.36
  -1  -5   7    1.56    1.38
   1  -5  -7    2.42    1.58
  -1  -5   7    0.00    1.14
  -1  -5   7    1.97    1.15
   1   5  -6  258.42   12.90
  -1   5   6  239.74   13.43
   1   5  -6  226.23   13.85
   1   5  -6  221.17   17.56
  -1   5   6  268.09   14.17
   1  -5  -6  239.82   14.65
   1  -5  -6  261.34   15.13
  -1  -5   6  240.44   13.99
   1  -5  -6  243.48   13.64
  -1  -5   6  238.49   12.89
  -1  -5   6  230.70   13.08
   1  -5  -6  234.30   14.30
  -1  -5   6  217.21   12.40
   1   5  -5    8.94    2.25
  -1   5   5   10.53    2.09
   1   5  -5    9.96    2.41
   1   5  -5   11.79    1.75
  -1   5   5   11.32    1.90
  -1   5   5    9.85    2.67
   1  -5  -5    8.88    2.09
   1  -5  -5    8.61    3.67
  -1  -5   5    7.62    1.93
  -1  -5   5   10.90    1.81
  -1  -5   5    7.65    1.90
  -1  -5   5    7.61    2.38
   1  -5  -5    8.63    2.12
   1   5  -4   17.55    3.31
   1   5  -4   19.28    4.27
  -1   5   4   20.21    2.23
  -1   5   4   21.50    4.04
  -1   5   4   18.39    3.54
   1   5  -4   18.17    4.86
   1  -5  -4   17.09    3.73
  -1  -5   4   18.63    2.13
   1  -5  -4   19.75    3.74
   1  -5  -4   18.55    2.76
  -1  -5   4   19.95    2.57
   1  -5  -4   16.19    2.96
  -1  -5   4   16.67    3.21
  -1  -5   4   17.18    2.60
  -1   5   3  636.81   39.01
   1   5  -3  615.29   37.70
   1   5  -3  730.10   37.08
  -1   5   3  699.83   35.51
   1   5  -3  623.86   35.79
  -1   5   3  636.51   39.71
   1  -5  -3  631.09   35.28
   1  -5  -3  597.86   38.33
  -1  -5   3  629.25   35.52
   1  -5  -3  641.59   40.76
   1  -5  -3  670.24   37.75
  -1  -5   3  672.05   45.92
  -1  -5   3  601.58   34.18
  -1  -5   3  703.05   35.54
   1  -5  -3  599.94   36.28
  -1   5   2   67.81    3.64
  -1   5   2   76.17    5.06
  -1   5   2   59.66    6.23
   1   5  -2   66.30    6.08
   1   5  -2   71.48    5.16
   1   5  -2   72.06    5.48
  -1   5   2   69.00    5.26
   1  -5  -2   64.15    5.05
  -1  -5   2   68.57    6.44
  -1  -5   2   72.14    3.66
  -1  -5   2   69.15    5.18
   1  -5  -2   68.42    5.32
   1  -5  -2   68.98    4.27
   1  -5  -2   62.67    6.74
  -1  -5   2   68.66    7.66
   1   5  -1  173.40    9.67
  -1   5   1  166.17    9.40
   1   5  -1  166.63   11.27
   1   5  -1  171.69    7.81
  -1   5   1  167.47   11.55
  -1   5   1  163.88    7.67
  -1   5   1  168.08    9.77
   1  -5  -1  164.60    7.79
   1  -5  -1  175.42   10.28
  -1  -5   1  189.15   10.46
  -1  -5   1  171.78   10.03
  -1  -5   1  187.03   12.25
   1  -5  -1  175.43   16.64
  -1   5   0   52.18    4.21
   1   5   0   50.24    3.87
  -1   5   0   50.75    2.62
   1   5   0   56.80    4.12
  -1   5   0   52.23    4.48
   1   5   0   56.28    7.81
  -1   5   0   54.55    5.53
   1  -5   0   51.65    4.50
   1  -5   0   49.07    2.58
   1  -5   0   55.26    5.77
   1  -5   0   51.52    4.36
  -1  -5   0   48.99    3.88
  -1  -5   0   52.92    5.65
  -1  -5   0   54.80    4.59
  -1   5  -1   16.47    2.43
  -1   5  -1   14.73    2.49
  -1   5  -1   14.55    1.53
   1   5   1   15.68    1.38
   1   5   1   17.33    3.12
   1   5   1   20.03    2.40
   1   5   1   17.26    2.36
  -1   5  -1   15.62    3.25
  -1  -5  -1   19.09    2.65
  -1  -5  -1   18.11    3.49
  -1  -5  -1   17.28    1.81
   1  -5   1   13.83    2.45
   1  -5   1   14.31    1.36
   1  -5   1   16.35    4.93
  -1  -5  -1   17.14    2.58
   1   5   2   28.41    2.33
  -1   5  -2   30.07    2.27
   1   5   2   25.35    3.03
  -1   5  -2   29.17    3.23
  -1   5  -2   30.20    3.94
   1   5   2   28.23    6.09
  -1   5  -2   28.56    5.13
   1  -5   2   27.04    3.17
   1  -5   2   25.30    2.97
  -1  -5  -2   24.85    3.36
  -1  -5  -2   26.63    2.68
  -1  -5  -2   22.47    4.43
  -1  -5  -2   27.70    3.31
   1  -5   2   27.25    2.05
   1  -5   2   28.16    3.90
  -1   5  -3  253.56   12.11
  -1   5  -3  261.64   20.68
  -1   5  -3  267.66   14.36
  -1   5  -3  246.31   14.12
   1   5   3  274.32   13.37
   1   5   3  265.46   17.23
   1   5   3  263.18   16.41
   1  -5   3  241.40   13.22
   1  -5   3  264.27   16.13
  -1  -5  -3  257.15   14.21
  -1  -5  -3  266.87   14.64
   1  -5   3  239.69   13.25
   1  -5   3  249.73   12.06
  -1  -5  -3  238.93   14.31
  -1  -5  -3  247.92   16.84
   1   5   4   42.05    3.32
  -1   5  -4   38.63    3.93
  -1   5  -4   41.91    3.79
  -1   5  -4   40.57    2.94
   1   5   4   43.08    5.54
  -1   5  -4   34.48    4.44
   1  -5   4   35.85    3.41
  -1  -5  -4   37.19    4.08
   1  -5   4   37.23    4.11
  -1  -5  -4   37.11    4.40
  -1  -5  -4   35.22    3.67
  -1  -5  -4   37.00    3.77
   1  -5   4   37.35    3.45
   1  -5   4   36.65    3.20
   1   5   5   61.26    6.94
  -1   5  -5   53.67    3.77
  -1   5  -5   57.53    5.47
  -1   5  -5   59.53    4.82
   1   5   5   70.14    4.68
  -1   5  -5   66.13    5.39
  -1  -5  -5   58.53    5.37
   1  -5   5   54.78    4.25
  -1  -5  -5   61.10    4.74
   1  -5   5   58.16    4.32
  -1  -5  -5   54.08    5.01
  -1  -5  -5   54.00    5.03
   1  -5   5   57.43    4.92
   1  -5   5   60.37    4.41
   1   5   6  213.99   11.68
  -1   5  -6  182.60   11.76
  -1   5  -6  190.63   10.22
   1   5   6  209.49   11.57
  -1   5  -6  187.54   11.18
  -1   5  -6  193.38   15.60
   1  -5   6  178.19   10.79
   1  -5   6  166.38    9.62
  -1  -5  -6  207.80   12.30
   1  -5   6  194.70   10.43
  -1  -5  -6  183.87   11.64
   1  -5   6  184.67   10.98
  -1  -5  -6  191.45   12.48
  -1  -5  -6  203.35   11.52
  -1   5  -7   28.87    3.98
   1   5   7   29.62    3.41
   1   5   7   30.70    5.42
  -1   5  -7   27.73    5.43
  -1   5  -7   30.68    4.56
   1  -5   7   24.92    3.57
   1  -5   7   28.30    3.13
   1  -5   7   27.87    2.83
  -1  -5  -7   31.63    4.12
  -1  -5  -7   28.06    3.54
   1  -5   7   26.88    2.81
  -1  -5  -7   34.79    3.29
   1   5   8   71.06    5.83
  -1   5  -8   70.32    5.78
  -1   5  -8   64.39    6.32
   1   5   8   65.81    7.89
   1  -5   8   65.78    4.65
   1  -5   8   71.78    6.07
  -1  -5  -8   67.74    5.58
   1  -5   8   60.06    4.67
  -1  -5  -8   67.56    7.23
   1  -5   8   73.30    4.98
   1   5   9   44.35    4.60
   1   5   9   45.42    6.65
  -1   5  -9   43.01    7.99
   1  -5   9   42.50    4.85
  -1  -5  -9   36.37    3.74
  -1  -5  -9   39.72    6.03
   1   5  10   34.11    4.40
  -1   5 -10   25.98    4.75
   1   5  10   34.00    4.38
   1  -5  10   32.04    4.51
  -1  -5 -10   34.90    5.54
  -1  -5 -10   24.39    4.93
   1   5  11   13.69    3.24
   1   5  11   15.05    3.45
  -1   5 -11   12.57    3.65
   1  -5  11   13.05    3.46
  -1  -5 -11   15.12    4.04
   1   5  12  112.89    9.47
   1   5  12  121.56   10.26
  -1   5 -12   89.54    9.69
  -1  -5 -12  120.12   11.61
   1  -5  12  103.92    9.97
   1   5  13   22.41    4.42
   1   5  13   22.35    4.44
  -1   5 -13   17.68    4.61
   1  -5  13   17.89    4.46
   1   5  14   16.40    4.35
  -1   5 -14   13.55    4.22
   1   5  14   20.66    4.49
   1  -5  14   16.34    6.91
   1   5  15   45.31    6.50
  -1   5 -15   37.27    6.49
  -1  -5 -15   39.25    7.11
   1  -5  15   44.00    6.35
   1   5  16   11.57    6.66
  -1   5 -16   13.95    3.95
  -1  -5 -16   17.34    4.52
   1  -5  16   12.85    4.04
   1   5  17    3.38    2.66
  -1   5 -17    3.54    4.12
   1  -5  17    2.35    4.28
  -1  -5 -17    4.07    2.82
   1   5  18   -0.83    1.51
  -1   5 -18    0.68    1.51
   1  -5  18   -0.81    1.54
  -1  -5 -18    0.38    2.55
   1   5  19    1.61    1.32
  -1   5 -19   -0.41    1.34
   1  -5  19   -1.71    2.23
  -1  -5 -19   -1.30    1.47
   1   5  20   26.43    4.14
  -1   5 -20   24.90    4.25
   1  -5  20   22.49    4.04
  -1  -5 -20   27.23    4.19
   1   5  21   19.40    2.93
  -1   5 -21   -0.00    2.96
   1  -5  21   11.02    2.65
  -1  -5 -21   17.09    2.88
  -1   7  19   -0.06    1.22
   1   7 -19    0.67    1.16
   1  -7 -19    0.23    1.22
  -1  -7  19    0.77    0.93
   1   7 -18    2.90    1.70
  -1   7  18    1.88    1.97
  -1  -7  18    3.34    2.21
   1  -7 -18    2.04    2.98
   1   7 -17    2.32    3.57
  -1   7  17    6.62    2.56
   1  -7 -17    5.98    2.49
  -1  -7  17    3.15    1.81
   1   7 -16    3.09    1.87
  -1   7  16    0.18    2.11
  -1  -7  16    1.73    1.44
   1  -7 -16    0.87    2.07
   1   7 -15    8.97    3.18
  -1   7  15   13.27    3.67
   1  -7 -15   10.92    3.57
  -1  -7  15   11.46    4.16
   1   7 -14  110.61   10.63
  -1   7  14  136.55   11.42
   1  -7 -14  129.10   11.65
  -1  -7  14  112.89    9.49
  -1   7  13   -0.57    1.34
   1   7 -13   -0.38    1.25
   1  -7 -13   -0.17    1.42
  -1  -7  13   -0.75    1.05
   1  -7 -13    1.19    1.03
   1   7 -12    7.97    2.90
  -1   7  12    7.60    4.51
   1  -7 -12    2.48    3.13
   1  -7 -12    7.78    2.60
  -1  -7  12   11.04    2.55
  -1   7  11   28.93    4.73
  -1   7  11   30.96    4.24
   1   7 -11   27.41    4.65
   1  -7 -11   24.49    4.13
  -1  -7  11   22.30    3.77
   1  -7 -11   22.57    3.88
  -1   7  10    3.10    1.96
   1   7 -10    1.70    2.23
  -1   7  10    3.06    2.20
   1  -7 -10    3.15    1.99
  -1  -7  10    2.88    2.66
   1  -7 -10    3.27    1.80
  -1   7   9  322.31   20.80
   1   7  -9  297.27   21.05
  -1   7   9  328.00   20.01
   1  -7  -9  323.66   21.25
  -1  -7   9  253.34   19.24
   1  -7  -9  296.12   20.20
  -1  -7   9  298.49   19.09
  -1   7   8  218.59   14.41
   1   7  -8  193.22   14.45
  -1   7   8  219.37   17.58
   1  -7  -8  188.11   14.04
  -1  -7   8  201.51   14.83
   1  -7  -8  214.75   19.72
  -1  -7   8  171.32   13.39
  -1  -7   8  192.98   12.49
  -1   7   7   37.62    4.14
   1   7  -7   31.57    4.99
  -1   7   7   36.35    4.89
   1  -7  -7   36.96    5.15
  -1  -7   7   25.60    4.34
   1  -7  -7   31.08    4.58
   1   7  -6    0.83    1.52
  -1   7   6   -0.41    2.49
   1   7  -6   -0.38    1.71
   1  -7  -6    2.34    1.79
  -1  -7   6    0.01    2.31
   1   7  -5   23.19    4.19
   1   7  -5   23.19    4.79
  -1   7   5   29.15    4.26
   1  -7  -5   23.61    4.97
   1  -7  -5   40.26    5.03
  -1  -7   5   21.71    3.92
   1   7  -4    6.42    2.40
   1   7  -4    6.23    2.93
  -1   7   4    5.46    2.44
   1  -7  -4    7.52    3.06
  -1  -7   4    4.39    2.66
   1   7  -3  206.48   14.32
  -1   7   3  228.56   14.96
   1   7  -3  226.19   17.08
   1  -7  -3  218.42   17.13
  -1  -7   3  205.16   14.68
   1   7  -2    3.95    2.78
  -1   7   2    4.30    3.09
   1   7  -2    2.70    2.10
   1  -7  -2    6.09    2.33
  -1   7   1  323.28   24.46
   1  -7  -1  310.35   20.71
  -1  -7   1  306.82   20.86
  -1   7   0   26.90    5.78
  -1  -7   0   31.97    4.67
  -1  -7   0   32.23    5.32
  -1   7  -1  150.22   13.30
  -1   7  -1  140.58   10.46
  -1  -7  -1  146.33   12.57
  -1   7  -2    2.93    3.95
   1   7   2    2.81    1.91
   1  -7   2    1.89    2.00
  -1  -7  -2    4.92    2.53
   1   7   3  192.31   12.88
  -1   7  -3  198.47   15.31
  -1   7  -3  159.46   12.23
   1  -7   3  182.97   13.02
  -1  -7  -3  189.58   15.15
  -1   7  -4  226.26   16.00
   1   7   4  248.34   16.09
  -1   7  -4  240.81   18.08
  -1  -7  -4  265.45   18.57
  -1  -7  -4  229.25   16.17
   1  -7   4  202.54   15.34
   1   7   5  190.15   17.26
  -1   7  -5  180.75   14.27
  -1   7  -5  172.05   12.87
   1  -7   5  151.82   11.71
  -1  -7  -5  181.28   12.71
  -1  -7  -5  193.20   14.04
   1   7   6   21.61    3.40
  -1   7  -6   22.77    4.36
   1   7   6   20.80    4.01
  -1   7  -6   25.48    6.89
  -1  -7  -6   29.61    4.53
  -1  -7  -6   17.72    5.89
   1  -7   6   21.70    5.52
   1   7   7  149.41   10.07
   1   7   7  135.08   10.39
  -1   7  -7  141.43   11.63
  -1   7  -7  129.60   11.18
   1  -7   7  117.22   10.31
  -1  -7  -7  145.50   11.34
  -1  -7  -7  131.18   11.38
   1   7   8  204.51   13.28
   1   7   8  200.90   13.73
  -1   7  -8  182.23   14.44
   1  -7   8  189.05   16.75
   1  -7   8  163.58   13.06
  -1  -7  -8  191.57   13.64
  -1  -7  -8  184.51   18.27
  -1   7  -9    1.06    1.60
   1   7   9    0.74    1.48
   1  -7   9    0.43    1.30
  -1  -7  -9    0.61    1.23
  -1  -7  -9    0.66    1.60
  -1  -7  -9   -0.46    1.44
  -1   7 -10   24.14    4.63
   1   7  10   26.17    4.33
   1  -7  10   21.49    3.70
  -1  -7 -10   23.93    4.53
  -1  -7 -10   21.58    3.88
  -1  -7 -10   19.39    3.68
   1   7  11   10.84    5.31
  -1   7 -11   13.53    3.45
  -1  -7 -11   10.61    3.00
   1  -7  11    9.82    2.87
  -1  -7 -11   12.18    3.55
   1   7  12   52.38    6.24
  -1   7 -12   41.94    6.35
   1  -7  12   46.23    5.40
  -1  -7 -12   41.35    5.22
  -1  -7 -12   47.94    6.48
  -1   7 -13   61.14    7.44
   1   7  13   73.01    7.85
   1  -7  13   64.25    6.60
  -1  -7 -13   66.66    6.90
  -1  -7 -13   71.08    7.77
  -1   7 -14   49.19    6.30
   1   7  14   61.09    6.92
   1  -7  14   50.70    5.74
  -1  -7 -14   50.49    6.86
   1   7  15  121.99   10.25
  -1   7 -15  100.38    9.29
   1  -7  15   95.96    8.14
  -1  -7 -15  109.38   10.24
   1   7  16   18.17    3.58
  -1   7 -16   11.68    3.26
   1  -7  16    8.42    2.52
  -1  -7 -16   18.54    3.83
   1   7  17   65.41    5.88
  -1   7 -17   53.61    5.55
   1  -7  17   39.11    4.41
  -1  -7 -17   51.16    5.59
   1   7  18    3.98    1.80
  -1   7 -18    3.07    1.73
  -1  -7 -18    3.03    1.81
   1  -7  18    2.15    1.39
   1   9 -14   22.46    3.12
  -1   9  14   32.02    4.05
   1   9 -13   -0.19    1.45
  -1   9  13    4.09    1.95
   1  -9 -13    3.37    1.10
  -1   9  12    0.38    1.39
   1   9 -12    0.78    1.82
   1  -9 -12    0.44    1.12
   1   9 -11   11.55    4.78
  -1   9  11   21.70    3.40
   1  -9 -11    7.55    2.69
   1  -9 -11   24.32    2.95
   1   9 -10   85.84   10.61
  -1   9  10   98.33   11.49
   1  -9 -10   71.52    7.27
   1  -9 -10   97.38    7.44
   1   9  -9    1.93    1.52
  -1   9   9    0.30    1.67
   1  -9  -9    3.36    2.25
   1  -9  -9    0.38    1.60
  -1  -9   9    0.57    2.23
   1   9  -8    0.69    1.65
  -1   9   8    2.57    1.71
   1  -9  -8    1.54    1.74
   1  -9  -8    0.62    1.67
  -1  -9   8    2.51    2.39
  -1   9   7    1.01    1.39
   1   9  -7   -1.63    1.37
   1  -9  -7    0.41    1.41
  -1  -9   7    1.49    1.37
   1  -9  -7    2.05    1.50
  -1  -9   7   -0.04    1.32
   1   9  -6    2.27    1.75
  -1   9   6    0.90    1.81
   1  -9  -6    0.85    1.29
   1  -9  -6   -2.88    1.23
  -1  -9   6   -0.60    1.73
  -1  -9   6    1.00    1.15
   1   9  -5    1.20    1.28
  -1   9   5    1.12    1.32
   1  -9  -5   -0.15    1.55
  -1  -9   5    1.15    1.35
   1  -9  -5   -2.32    1.46
  -1  -9   5   -0.19    1.34
   1   9  -4   23.09    4.01
  -1   9   4   23.19    4.27
   1  -9  -4   23.67    4.76
  -1  -9   4   23.94    4.30
  -1  -9   4   19.43    4.26
  -1   9   3  200.19   19.23
   1   9  -3  200.97   14.37
   1  -9  -3  153.06   14.00
  -1  -9   3  151.79   12.92
   1   9  -2  327.19   21.97
  -1   9   2  350.04   23.37
   1  -9  -2  306.18   22.91
  -1  -9   2  280.94   22.10
  -1  -9   2  284.29   21.36
   1  -9  -1   67.18    8.08
  -1  -9   1   69.58    7.90
   1  -9   0    4.58    2.70
  -1  -9   0    3.92    2.69
   1  -9   1    9.46    5.11
  -1  -9  -1    7.09    5.28
   1  -9   2    2.93    4.33
  -1  -9  -2    7.07    2.97
   1   9   3    3.47    1.44
  -1   9  -3   -0.96    1.47
   1  -9   3   -2.11    1.55
   1  -9   3    0.97    2.54
  -1  -9  -3    1.03    1.70
   1   9   4   55.76    6.01
  -1   9  -4   54.03    5.99
   1  -9   4   53.32    6.35
   1  -9   4   47.49    5.97
  -1  -9  -4   57.48   10.39
  -1  -9  -4   48.49    6.52
  -1   9  -5   48.66    5.77
   1   9   5   45.97    8.14
   1  -9   5   45.46    5.81
  -1  -9  -5   52.74    6.34
   1  -9   5   40.43    5.55
  -1  -9  -5   50.70    6.02
   1   9   6    3.92    2.14
  -1   9  -6    5.50    2.23
   1  -9   6    4.42    2.15
   1  -9   6    3.36    2.11
  -1  -9  -6    5.58    3.93
  -1  -9  -6    4.18    2.23
  -1   9  -7    1.26    1.55
   1   9   7    1.71    1.57
   1  -9   7    1.27    1.39
  -1  -9  -7    1.41    1.71
   1  -9   7    0.54    2.22
  -1  -9  -7   -0.23    1.61
  -1   9  -8   17.89    3.53
   1   9   8   28.03    3.62
   1  -9   8    7.62    3.21
  -1  -9  -8   16.95    3.38
  -1  -9  -8   26.59    3.77
   1   9   9   31.02    6.54
  -1   9  -9   28.58    6.08
  -1  -9  -9   32.16    4.10
  -1  -9  -9    8.26    5.62
   1   9  10    5.61    2.29
  -1   9 -10    6.03    2.11
  -1  -9 -10    6.18    2.02
  -1  -9 -10    3.01    1.76
   1   9  11    0.37    1.20
  -1   9 -11   -0.26    1.04
  -1  -9 -11   -0.57    1.09
   1   9  12    6.40    2.42
  -1   9 -12    6.11    2.05
  -1  -9 -12    7.02    1.87
   1   9  13    0.73    1.33
  -1   9 -13    0.35    1.83
  -2   0  25    0.70    1.29
  -2   0  24   44.73    5.30
  -2   0  23    1.30    1.75
  -2   0  22   32.07    5.53
  -2   0  22   58.37    6.12
  -2   0  21   -1.01    1.88
  -2   0  21   -1.26    1.78
  -2   0  20    1.47    1.64
  -2   0  20   -0.29    1.58
  -2   0  19   -0.19    1.54
  -2   0  19    1.10    1.58
  -2   0  18   21.39    4.36
  -2   0  18   23.77    6.83
   2   0 -17   -0.12    1.52
  -2   0  17   -0.59    1.18
  -2   0  17    0.79    1.18
   2   0 -16    1.87    1.42
  -2   0  16    1.28    1.76
  -2   0  16    2.74    2.79
  -2   0  15    0.52    0.93
  -2   0  15    0.13    1.18
  -2   0  15    0.17    1.21
   2   0 -14   64.63    5.36
   2   0 -14   71.39    4.51
  -2   0  14   77.29    4.95
  -2   0  14   73.68    5.97
  -2   0  14   67.50    5.92
   2   0 -13    0.11    0.65
   2   0 -13   -0.23    0.82
  -2   0  13    0.26    0.90
  -2   0  13   -1.09    1.05
  -2   0  13    1.22    0.94
   2   0 -12    8.33    2.29
   2   0 -12    9.86    1.81
  -2   0  12    8.33    2.05
  -2   0  12    6.70    2.09
  -2   0  12    8.41    1.51
   2   0 -11    0.02    0.89
   2   0 -11    0.34    0.33
   2   0 -11    1.03    0.72
  -2   0  11    0.87    1.00
  -2   0  11    1.73    1.03
  -2   0  11    0.45    0.38
  -2   0  11    0.74    0.76
   2   0 -10   93.25    4.57
   2   0 -10   81.84    2.20
   2   0 -10   70.87    4.93
   2   0 -10   88.72    3.11
  -2   0  10   83.88    8.47
  -2   0  10   86.36    3.17
  -2   0  10   84.48    5.50
  -2   0  10   87.68    4.61
   2   0  -9    1.21    1.00
   2   0  -9    3.28    0.28
   2   0  -9    2.79    0.37
   2   0  -9    2.09    0.91
   2   0  -9    1.55    0.80
  -2   0   9    1.76    0.86
  -2   0   9    1.76    1.18
  -2   0   9    2.63    1.11
  -2   0   9    1.72    0.37
   2   0  -8    7.00    0.36
   2   0  -8    6.13    1.08
   2   0  -8    8.82    0.98
   2   0  -8    7.81    0.80
  -2   0   8    7.04    2.22
  -2   0   8    7.29    1.08
  -2   0   8    8.91    1.31
  -2   0   8    8.19    0.75
   2   0  -7    1.53    0.35
   2   0  -7    1.84    1.21
   2   0  -7    1.66    0.22
   2   0  -7    1.36    0.69
   2   0  -7    1.80    0.66
  -2   0   7    2.28    0.35
  -2   0   7    1.51    0.72
  -2   0   7    4.89    0.92
  -2   0   7    0.76    0.82
   2   0  -6  245.96    8.18
   2   0  -6  223.88   10.14
   2   0  -6  250.41   10.60
   2   0  -6  266.33   10.44
   2   0  -6  226.36    7.02
  -2   0   6  260.44   10.79
  -2   0   6  270.72    8.61
  -2   0   6  238.03   14.83
  -2   0   6  263.58   11.49
   2   0  -5   -0.12    0.81
   2   0  -5    0.35    0.47
   2   0  -5    0.59    0.20
   2   0  -5    0.81    0.80
   2   0  -5    0.07    1.36
  -2   0   5    1.69    0.47
  -2   0   5    1.12    0.79
  -2   0   5    0.46    0.92
  -2   0   5    0.41    0.84
   2   0  -4 1421.36   77.45
   2   0  -4 1385.14   70.91
   2   0  -4 1754.95   90.70
   2   0  -4 1271.09   60.16
   2   0  -4 1598.46   84.44
  -2   0   4 1570.56   80.02
  -2   0   4 1538.17   83.66
  -2   0   4 1612.61   85.24
  -2   0   4 1659.32   87.17
   2   0  -3    1.82    0.08
   2   0  -3    1.76    0.12
   2   0  -3    1.43    0.36
   2   0  -3    1.43    0.36
   2   0  -3    1.96    0.28
   2   0  -3    1.05    0.47
  -2   0   3    1.94    0.57
  -2   0   3   -0.05    0.35
  -2   0   3    2.02    0.25
  -2   0   3    1.74    0.32
   2   0  -2   14.88    0.46
   2   0  -2   15.75    0.71
   2   0  -2   13.49    0.41
   2   0  -2   14.93    0.37
  -2   0   2   15.49    0.44
  -2   0   2   17.77    0.53
  -2   0   2   15.71    0.47
  -2   0   2   14.00    0.37
   2   0   1    2.35    0.43
   2   0   1    1.86    0.24
   2   0   1    1.43    0.24
  -2   0  -1    1.25    0.24
  -2   0  -1    1.64    0.25
  -2   0  -1    1.24    0.24
  -2   0  -1    1.58    0.07
  -2   0  -1    1.37    0.23
   2   0   2  176.67    6.49
   2   0   2  176.95    5.95
   2   0   2  187.08    5.67
   2   0   2  168.76    6.77
  -2   0  -2  177.84    5.31
  -2   0  -2  182.98    5.60
  -2   0  -2  172.42    5.53
  -2   0  -2  173.42    5.31
   2   0   3    9.94    1.25
   2   0   3   10.27    1.47
   2   0   3   13.65    1.52
   2   0   3    8.13    1.27
  -2   0  -3   11.23    1.62
  -2   0  -3   10.42    1.32
  -2   0  -3    9.52    1.19
   2   0   412280.35 1433.36
   2   0   412264.37 1422.36
   2   0   410279.81 1222.19
   2   0   411813.34 1354.10
  -2   0  -412742.70 1470.47
  -2   0  -4 9714.27 1149.63
  -2   0  -4 9983.08 1156.93
   2   0   5   34.36    2.41
   2   0   5   24.85    2.02
   2   0   5   29.65    1.52
   2   0   5   31.84    2.60
  -2   0  -5   29.85    1.52
  -2   0  -5   37.06    2.09
  -2   0  -5   34.73    2.31
   2   0   6 3261.27  236.02
   2   0   6 3149.11  222.90
   2   0   6 2825.54  195.47
   2   0   6 2943.21  216.63
  -2   0  -6 3083.13  221.40
  -2   0  -6 2813.12  205.61
  -2   0  -6 2899.56  200.43
   2   0   7    9.23    0.79
   2   0   7    7.29    2.27
   2   0   7    7.73    1.63
   2   0   7    7.08    1.93
  -2   0  -7    9.47    1.19
   2   0   8  100.57    3.87
   2   0   8  100.61    5.89
   2   0   8   99.34    5.87
   2   0   8  107.15    5.33
  -2   0  -8   93.97    5.66
  -2   0  -8  105.45    5.19
  -2   0  -8  115.57    5.06
   2   0   9    4.59    0.93
   2   0   9    0.09    1.13
   2   0   9   -0.34    1.18
  -2   0  -9    0.45    0.86
  -2   0  -9    0.20    0.79
  -2   0  -9   -0.40    1.71
   2   0  10 1900.01  124.78
   2   0  10 1866.00  133.40
   2   0  10 1909.58  133.51
  -2   0 -10 1884.58  127.27
  -2   0 -10 1777.43  116.96
  -2   0 -10 1705.55  106.01
   2   0  11    1.23    1.10
   2   0  11    0.61    1.12
   2   0  11    0.22    0.88
  -2   0 -11   -0.01    1.31
  -2   0 -11    0.98    1.61
   2   0  12  564.89   36.47
   2   0  12  646.82   42.41
  -2   0 -12  653.88   35.07
  -2   0 -12  630.53   36.64
  -2   0 -12  631.24   36.64
   2   0  13    0.47    1.25
   2   0  13   -0.20    1.17
  -2   0 -13   -1.08    0.98
  -2   0 -13    0.04    1.37
   2   0  14  188.74   16.33
   2   0  14  162.81   12.92
  -2   0 -14  179.66   11.58
   2   0  15   -1.31    1.50
   2   0  15    1.74    2.44
  -2   0 -15   -0.65    1.24
   2   0  16  174.96   17.29
   2   0  16  139.44   12.07
  -2   0 -16  137.46   11.15
   2   0  17    0.64    1.77
   2   0  17    1.07    1.75
   2   0  18   20.41    4.21
   2   0  18   13.36    6.72
   2   0  19    0.48    1.50
   2   0  19   -0.91    1.48
   2   0  20  130.20   13.30
   2   0  20  192.64   13.73
   2   0  21   -0.21    1.31
   2   0  21    0.60    1.36
   2   0  22   27.92    3.61
   2   0  22    6.82    3.06
   2   0  23   -0.01    1.01
   2   2 -25   -0.00    1.88
  -2   2  25    5.19    1.77
  -2   2  24   51.37    5.24
  -2  -2  24   52.29    5.11
  -2  -2  24   38.32    4.51
  -2   2  23   41.80    5.35
  -2  -2  23   46.46    5.37
  -2  -2  23   31.55    5.07
  -2   2  22   14.55    3.31
  -2  -2  22   18.24    3.29
   2  -2 -22    1.09    2.74
  -2  -2  22   12.28    3.34
  -2   2  21    8.70    2.83
   2  -2 -21    0.53    2.47
  -2  -2  21    9.29    2.86
  -2  -2  21    4.99    2.85
  -2   2  20  252.23   23.71
   2  -2 -20  237.73   18.12
  -2  -2  20  228.79   19.13
  -2  -2  20  253.29   18.05
  -2   2  19   42.48    6.05
   2  -2 -19   42.53    5.97
  -2  -2  19   36.05    6.52
  -2  -2  19   44.14    5.73
  -2   2  18    9.81    3.12
  -2  -2  18    8.89    2.99
   2  -2 -18    7.42    3.16
  -2  -2  18    8.65    3.46
  -2   2  17   47.19    5.67
  -2   2  17   49.31    6.26
  -2  -2  17   39.56    6.41
  -2  -2  17   46.82    8.75
  -2   2  16  403.49   32.63
  -2   2  16  396.86   24.79
  -2  -2  16  370.24   26.87
  -2  -2  16  344.15   23.27
  -2   2  15  141.10   10.91
  -2   2  15  137.89    9.72
  -2  -2  15  131.06    9.90
  -2  -2  15  129.86   15.46
  -2   2  14  180.36   12.71
  -2   2  14  199.59   11.99
  -2  -2  14  167.83   11.45
  -2  -2  14  174.23   13.13
   2   2 -13   32.03    4.93
  -2   2  13   26.27    3.72
  -2   2  13   27.12    3.39
   2   2 -13   31.75    3.04
  -2   2  13   20.35    2.72
   2  -2 -13   21.56    1.77
   2  -2 -13   20.54    4.80
  -2  -2  13   25.59    4.00
  -2  -2  13   25.87    5.07
  -2   2  12    2.56    1.65
   2   2 -12    3.14    1.43
   2   2 -12    4.93    1.51
  -2   2  12    5.71    2.81
  -2   2  12    3.87    1.16
  -2  -2  12    4.52    1.57
  -2  -2  12    3.10    1.97
   2  -2 -12    2.35    0.79
   2  -2 -12    4.48    1.51
  -2   2  11   82.43    5.89
  -2   2  11   83.90    6.16
  -2   2  11   81.71    4.67
   2   2 -11   94.14    5.58
   2  -2 -11   91.62    5.61
   2  -2 -11   74.08    3.38
   2  -2 -11   88.03    3.77
   2  -2 -11   82.08    3.72
  -2  -2  11   83.77    6.64
  -2  -2  11   77.18    5.58
   2   2 -10  305.18   11.41
   2   2 -10  302.43   11.52
   2   2 -10  317.87   12.26
   2   2 -10  345.95   16.62
  -2   2  10  319.02   16.37
  -2   2  10  300.85   13.79
  -2   2  10  313.90   16.50
   2  -2 -10  315.36   12.98
   2  -2 -10  255.03   10.72
   2  -2 -10  296.80   12.36
   2  -2 -10  306.87   17.63
   2  -2 -10  291.97   15.03
  -2  -2  10  293.64    9.91
  -2  -2  10  330.65   12.87
  -2  -2  10  300.84   17.55
  -2  -2  10  281.77   15.18
   2   2  -9  470.09   18.11
   2   2  -9  497.50   22.19
  -2   2   9  532.76   26.22
   2   2  -9  450.06   17.64
  -2   2   9  501.02   30.62
   2   2  -9  480.61   24.27
  -2   2   9  489.60   22.03
   2  -2  -9  451.59   18.81
   2  -2  -9  456.70   26.92
   2  -2  -9  471.91   22.49
  -2  -2   9  472.14   24.37
  -2  -2   9  507.24   21.72
  -2  -2   9  428.54   17.00
   2  -2  -9  514.72   22.37
  -2  -2   9  505.75   27.71
   2  -2  -9  500.23   27.85
   2   2  -8  393.45   15.93
   2   2  -8  416.99   16.84
   2   2  -8  385.04   13.38
   2   2  -8  365.99   12.47
  -2   2   8  424.63   18.41
  -2   2   8  427.91   19.94
   2   2  -8  414.48   20.07
   2   2  -8  359.51   18.04
  -2   2   8  436.53   21.23
   2  -2  -8  422.75   19.78
   2  -2  -8  381.95   14.63
  -2  -2   8  389.82   14.78
   2  -2  -8  473.07   19.18
   2  -2  -8  431.10   22.59
  -2  -2   8  416.77   21.60
  -2  -2   8  378.41   15.72
   2  -2  -8  419.31   17.44
  -2  -2   8  352.01   17.75
   2   2  -7  474.12   19.01
   2   2  -7  416.22   19.59
  -2   2   7  426.64   19.35
  -2   2   7  454.44   21.91
   2   2  -7  392.66   12.35
   2   2  -7  434.67   13.71
   2   2  -7  437.05   17.83
  -2   2   7  459.66   19.40
   2   2  -7  455.36   24.41
  -2   2   7  459.81   17.82
   2  -2  -7  445.53   22.65
  -2  -2   7  456.25   18.86
   2  -2  -7  377.19   14.32
   2  -2  -7  485.05   22.19
   2  -2  -7  465.85   20.88
  -2  -2   7  459.20   22.79
  -2  -2   7  452.84   20.74
  -2  -2   7  421.55   17.43
   2   2  -6    8.76    0.97
  -2   2   6   10.66    0.89
  -2   2   6    5.71    2.44
   2   2  -6   11.72    2.27
   2   2  -6    9.67    1.46
  -2   2   6    9.78    1.12
  -2   2   6   10.03    1.30
  -2   2   6    8.45    1.30
  -2  -2   6    9.80    0.90
  -2  -2   6   11.11    1.66
   2  -2  -6   11.17    1.74
  -2  -2   6    8.64    0.93
   2  -2  -6   11.24    1.31
   2  -2  -6    8.17    0.51
  -2  -2   6    9.66    1.31
  -2   2   5  114.59    5.74
   2   2  -5  111.40    4.72
   2   2  -5  116.06    5.87
   2   2  -5  122.12    7.87
  -2   2   5  121.24    5.27
  -2   2   5  119.37    5.06
  -2   2   5  111.26    3.20
  -2   2   5  117.93    5.53
  -2   2   5  118.29    3.15
   2  -2  -5  112.97    6.13
  -2  -2   5  117.80    5.90
   2  -2  -5  123.98    5.31
  -2  -2   5  109.75    5.67
  -2  -2   5  112.50    5.18
  -2  -2   5  120.96    6.18
  -2   2   4 1026.00   52.10
   2   2  -4  985.57   49.49
  -2   2   4 1011.97   54.21
   2   2  -4  961.68   51.34
  -2   2   4  996.99   52.58
  -2   2   4 1034.38   42.95
  -2   2   4 1014.63   42.28
  -2   2   4 1032.06   52.07
  -2  -2   4  959.02   49.75
  -2  -2   4  934.33   50.44
   2  -2  -4 1012.54   51.74
  -2  -2   4  970.27   50.07
  -2  -2   4  905.12   45.68
   2  -2  -4 1049.47   56.02
   2   2  -3   29.96    2.80
   2   2  -3   28.60    2.86
  -2   2   3   28.27    0.80
  -2   2   3   25.62    2.55
  -2   2   3   27.66    2.74
  -2   2   3   24.40    0.66
   2   2  -3   29.66    2.56
  -2   2   3   28.46    5.34
   2  -2  -3   29.24    2.68
   2  -2  -3   30.04    2.46
   2  -2  -3   32.07    2.82
  -2  -2   3   26.04    2.81
   2  -2  -3   26.01    3.37
  -2  -2   3   24.96    2.70
  -2  -2   3   26.04    2.41
   2  -2  -3   25.31    2.94
   2   2  -2 4185.85  342.06
   2   2  -2 4473.63  362.54
  -2   2   2 4158.88  339.99
  -2   2   2 4471.87  369.68
   2   2  -2 4294.69  349.94
   2   2  -2 4515.97  374.12
  -2   2   2 4365.75  367.75
   2   2  -2 4393.75  351.95
   2  -2  -2 4407.39  370.86
   2  -2  -2 4295.31  351.25
  -2  -2   2 4146.34  338.50
   2  -2  -2 4462.25  364.43
  -2  -2   2 4425.11  369.05
   2  -2  -2 4425.52  360.30
   2  -2  -2 3999.24  327.16
  -2  -2   2 4105.78  333.92
  -2  -2   2 4076.68  308.23
  -2   2   1  670.93   35.51
  -2   2   1  604.95   24.54
   2   2  -1  628.71   28.89
   2   2  -1  609.01   30.28
   2   2  -1  632.13   33.19
   2   2  -1  666.12   31.19
  -2   2   1  625.02   30.38
  -2   2   1  647.32   29.13
   2  -2  -1  646.53   31.26
   2  -2  -1  601.80   30.01
   2  -2  -1  641.84   34.23
   2  -2  -1  650.73   32.41
   2  -2  -1  593.44   23.99
   2  -2  -1  610.26   27.91
  -2  -2   1  632.32   30.93
  -2  -2   1  590.03   27.85
  -2  -2   1  574.17   31.77
  -2  -2   1  622.89   31.06
  -2  -2   1  631.42   27.63
  -2   2   0 1022.58   56.20
   2   2   0 1081.37   58.47
   2   2   0 1022.12   59.33
  -2   2   0 1088.26   63.19
   2   2   0 1103.66   59.05
  -2   2   0 1120.27   54.91
   2   2   0 1166.64   59.85
  -2   2   0 1060.45   52.46
  -2   2   0 1072.31   58.15
   2  -2   0 1024.74   55.42
  -2  -2   0 1153.08   61.11
   2  -2   0 1036.87   60.26
  -2  -2   0 1069.39   59.19
   2  -2   0 1067.80   57.56
   2  -2   0 1091.56   58.47
  -2  -2   0 1206.93   63.35
   2  -2   0 1045.88   51.26
  -2  -2   0 1162.89   66.11
  -2   2  -1 2392.26  170.18
  -2   2  -1 2290.76  160.67
   2   2   1 2560.03  172.77
   2   2   1 2261.69  146.90
  -2   2  -1 2193.15  136.30
   2   2   1 2249.50  156.40
   2   2   1 2663.35  174.49
  -2   2  -1 2485.94  159.78
  -2   2  -1 2399.52  159.17
   2  -2   1 2456.63  168.80
  -2  -2  -1 2299.27  162.49
   2  -2   1 2497.94  164.03
   2  -2   1 2284.48  156.58
   2  -2   1 2342.74  154.24
  -2  -2  -1 2570.19  169.38
   2  -2   1 2275.26  138.03
  -2  -2  -1 2511.39  165.08
  -2  -2  -1 2375.03  158.14
   2   2   2  137.83    7.57
  -2   2  -2  146.23    7.57
   2   2   2  131.62    5.99
   2   2   2  126.94    4.53
  -2   2  -2  152.07    6.35
   2   2   2  150.95    6.84
   2   2   2  135.43    4.56
  -2   2  -2  134.12    6.75
  -2   2  -2  145.86    4.13
   2  -2   2  142.30    8.11
   2  -2   2  143.47    6.89
  -2  -2  -2  135.85    8.07
  -2  -2  -2  137.99    6.40
  -2  -2  -2  139.38    7.00
   2  -2   2  142.96    5.94
   2  -2   2  131.88    6.53
  -2  -2  -2  154.16    6.49
   2  -2   2  139.95    4.52
   2  -2   2  157.65    7.64
  -2   2  -3   23.86    2.00
   2   2   3   24.20    1.62
  -2   2  -3   21.93    1.07
   2   2   3   19.99    1.08
   2   2   3   24.96    1.81
   2   2   3   25.07    2.08
  -2   2  -3   21.28    2.14
  -2   2  -3   20.82    1.74
   2  -2   3   22.02    1.90
   2  -2   3   21.36    1.46
   2  -2   3   21.59    2.07
   2  -2   3   23.15    2.07
  -2  -2  -3   24.45    1.89
   2  -2   3   18.38    1.44
  -2  -2  -3   25.86    2.02
  -2  -2  -3   22.55    2.28
  -2  -2  -3   21.86    2.49
  -2   2  -4   24.57    1.99
   2   2   4   21.88    2.05
   2   2   4   18.97    1.08
  -2   2  -4   28.41    1.89
   2   2   4   21.50    1.04
  -2   2  -4   24.14    2.95
   2   2   4   24.97    1.79
  -2   2  -4   24.87    1.03
   2  -2   4   26.37    2.01
   2  -2   4   27.29    1.36
  -2  -2  -4   24.14    2.22
   2  -2   4   25.19    1.64
  -2  -2  -4   21.15    2.32
  -2  -2  -4   22.36    1.84
   2  -2   4   25.00    2.24
  -2  -2  -4   22.12    1.79
   2  -2   4   22.46    1.21
  -2   2  -5    1.48    0.80
  -2   2  -5    1.57    0.88
   2   2   5    1.55    0.94
   2   2   5    2.63    0.78
   2   2   5    3.79    0.49
  -2   2  -5    1.72    0.79
   2  -2   5    1.48    1.44
   2  -2   5    0.37    1.03
   2  -2   5    1.57    0.61
  -2  -2  -5    1.47    0.90
  -2  -2  -5    1.32    1.19
   2  -2   5    1.02    0.43
   2  -2   5    1.15    0.77
  -2  -2  -5    3.31    1.13
  -2  -2  -5    2.55    0.83
   2   2   6  211.25    8.08
  -2   2  -6  208.73    9.02
   2   2   6  216.59    9.68
  -2   2  -6  177.23    6.45
  -2   2  -6  235.73   12.33
   2   2   6  234.35   10.62
  -2   2  -6  219.30   10.25
   2  -2   6  207.05    7.03
  -2  -2  -6  212.22    7.85
   2  -2   6  181.76    9.35
  -2  -2  -6  202.97   11.04
   2  -2   6  221.18    7.54
   2  -2   6  210.65    8.09
  -2  -2  -6  192.79   11.38
   2  -2   6  214.96   10.92
  -2  -2  -6  183.04    7.16
  -2  -2  -6  209.82    8.70
   2   2   7  194.41    9.79
  -2   2  -7  170.57    6.01
   2   2   7  181.37    7.93
  -2   2  -7  195.85    7.17
  -2   2  -7  234.59   10.62
  -2   2  -7  215.86   11.11
  -2   2  -7  204.79    8.94
   2   2   7  184.34   10.26
   2  -2   7  184.75   10.09
  -2  -2  -7  185.35    8.20
   2  -2   7  212.48    6.97
   2  -2   7  205.90   11.55
   2  -2   7  202.74    7.87
  -2  -2  -7  187.34   11.25
   2  -2   7  214.74    7.12
  -2  -2  -7  172.56    9.14
  -2  -2  -7  185.55    7.15
  -2   2  -8  168.73    9.30
   2   2   8  169.84    8.00
  -2   2  -8  204.30   12.67
   2   2   8  175.23    9.87
  -2   2  -8  189.40   10.42
   2   2   8  192.57    9.89
  -2   2  -8  163.55    5.93
   2  -2   8  171.74    5.73
   2  -2   8  161.66   12.65
  -2  -2  -8  164.63   10.55
  -2  -2  -8  152.26    6.69
   2  -2   8  174.89    7.14
  -2  -2  -8  172.87    7.65
  -2  -2  -8  148.54    8.49
  -2  -2  -8  181.60    6.67
   2  -2   8  178.93    5.71
   2  -2   8  190.51   11.26
   2   2   9   24.14    4.38
  -2   2  -9   20.61    1.20
   2   2   9   21.17    2.98
  -2   2  -9   20.22    2.59
  -2   2  -9   23.56    2.89
   2   2   9   20.06    1.98
  -2   2  -9   18.83    1.74
  -2  -2  -9   19.23    1.57
   2  -2   9   21.16    5.07
  -2  -2  -9   21.81    1.78
   2  -2   9   17.80    1.29
  -2  -2  -9   22.32    1.20
   2  -2   9   17.62    2.76
  -2  -2  -9   20.85    2.50
  -2  -2  -9   20.39    3.11
  -2   2 -10   46.54    3.54
   2   2  10   39.93    3.90
   2   2  10   43.75    6.04
   2   2  10   37.23    3.09
  -2   2 -10   43.12    3.97
  -2  -2 -10   39.17    3.80
   2  -2  10   32.06    5.76
   2  -2  10   38.92    4.60
  -2  -2 -10   28.33    3.44
  -2  -2 -10   31.48    2.27
  -2   2 -11    7.85    1.98
   2   2  11   11.67    2.51
   2   2  11   10.04    1.84
  -2   2 -11    9.37    2.28
   2   2  11   12.91    3.77
   2  -2  11    8.84    2.70
  -2  -2 -11    8.45    1.34
   2  -2  11    9.03    3.67
  -2  -2 -11   10.13    1.28
  -2  -2 -11    8.26    2.11
   2   2  12  225.30   13.99
   2   2  12  229.11   13.41
   2   2  12  186.47   11.61
   2  -2  12  195.03   18.74
   2  -2  12  192.69   12.18
  -2  -2 -12  183.90    9.11
   2   2  13  307.47   19.96
   2   2  13  380.40   22.97
   2   2  13  390.79   22.50
   2  -2  13  322.28   22.73
   2  -2  13  328.75   20.66
  -2  -2 -13  318.00   16.36
   2   2  14    1.16    1.64
   2   2  14    2.09    1.82
   2   2  14    0.90    2.31
   2  -2  14    0.76    1.68
   2  -2  14    1.92    1.96
   2   2  15   45.63    5.81
   2  -2  15   38.26    8.27
   2  -2  15   34.51    6.31
  -2  -2 -15   41.24    5.76
   2   2  16   26.27    4.62
   2  -2  16   24.35    5.23
   2  -2  16   23.51    4.67
  -2  -2 -16   24.96    7.42
   2   2  17   16.66    5.86
   2  -2  17    8.18    4.08
   2  -2  17   10.79    3.60
  -2  -2 -17   18.08    3.60
   2   2  18  222.24   16.66
   2  -2  18  208.10   16.21
   2  -2  18  174.27   23.08
  -2  -2 -18  210.95   16.98
   2   2  19   35.11    5.58
   2  -2  19   42.03    5.73
   2  -2  19   32.36    6.04
  -2  -2 -19   28.77    4.80
   2   2  20   14.97    3.59
   2  -2  20   16.77    3.63
   2  -2  20   11.43    3.70
  -2  -2 -20    0.92    4.41
   2   2  21   24.52    4.02
   2  -2  21   16.19    4.05
   2  -2  21   23.05    4.03
  -2  -2 -21   15.31    3.03
   2   2  22   75.83   10.17
   2  -2  22   70.72    6.86
   2  -2  22   58.16    6.51
   2   2  23    1.71    1.86
  -2   2 -23    0.00    1.33
   2  -2  23   -1.29    1.09
   2   4 -23   52.50    5.31
  -2   4  23   54.63    5.06
  -2  -4  23   42.15    4.69
   2  -4 -23   48.37    4.82
   2   4 -22    0.03    1.13
  -2   4  22   -1.14    1.14
   2  -4 -22    0.72    1.04
  -2  -4  22    0.09    1.06
   2   4 -21    1.37    1.68
  -2   4  21    0.75    1.65
   2  -4 -21   -0.50    1.70
  -2  -4  21    1.10    1.71
   2   4 -20    6.23    3.02
  -2   4  20    7.11    2.99
  -2  -4  20    5.96    2.99
   2  -4 -20    7.20    3.10
   2   4 -19   24.56    4.76
  -2   4  19   23.26    4.69
  -2  -4  19   19.58    4.87
   2  -4 -19   19.17    5.03
   2   4 -18    9.61    3.64
  -2   4  18   16.06    3.90
   2  -4 -18    3.68    3.86
  -2  -4  18   13.49    3.63
  -2   4  17    9.08    3.25
  -2   4  17   10.81    5.29
  -2  -4  17    5.29    2.95
  -2  -4  17    6.73    3.52
  -2   4  16  192.05   15.31
  -2   4  16  195.53   14.77
  -2  -4  16  161.33   15.03
  -2  -4  16  154.88   12.75
  -2   4  15   10.54    3.28
  -2   4  15    8.17    3.12
  -2  -4  15    6.92    3.28
  -2  -4  15    6.04    2.95
  -2   4  14    0.81    1.73
  -2   4  14    0.24    1.74
  -2  -4  14   -0.43    2.86
  -2  -4  14    1.86    1.58
  -2   4  13   76.05   10.86
  -2   4  13   73.99    6.98
  -2  -4  13   75.22    7.63
  -2  -4  13   69.00    6.66
  -2   4  12  301.95   18.90
  -2   4  12  293.00   17.90
   2  -4 -12  314.55   16.34
  -2  -4  12  281.21   19.24
  -2  -4  12  257.15   16.99
  -2   4  11   12.55    2.71
  -2   4  11    8.91    3.77
   2  -4 -11    9.40    2.67
  -2  -4  11   10.94    2.45
   2  -4 -11    8.30    1.73
  -2  -4  11    9.61    2.69
  -2   4  10   31.77    5.38
   2   4 -10   31.53    3.40
  -2   4  10   38.64    4.04
   2  -4 -10   35.35    3.80
   2  -4 -10   30.89    4.53
   2  -4 -10   33.16    4.45
   2  -4 -10   33.26    2.88
  -2  -4  10   27.65    2.59
  -2  -4  10   28.69    2.59
  -2  -4  10   31.40    4.13
  -2  -4  10   29.54    3.63
   2   4  -9  291.55   17.28
   2   4  -9  307.79   16.03
   2   4  -9  296.72   17.22
  -2   4   9  304.87   19.55
  -2   4   9  291.67   21.15
   2  -4  -9  294.52   18.46
   2  -4  -9  293.07   20.50
   2  -4  -9  270.19   17.64
  -2  -4   9  283.72   14.03
  -2  -4   9  297.25   17.47
   2  -4  -9  284.81   17.32
  -2  -4   9  305.06   14.87
  -2  -4   9  277.18   13.42
   2   4  -8   14.76    2.33
  -2   4   8   11.68    3.12
   2   4  -8    8.82    1.73
   2   4  -8   12.10    3.19
  -2   4   8   10.06    2.24
   2  -4  -8    8.29    2.52
   2  -4  -8    8.23    1.83
  -2  -4   8    7.64    3.49
   2  -4  -8    9.60    3.14
   2  -4  -8   10.16    2.21
  -2  -4   8    8.90    1.58
  -2  -4   8   10.12    1.57
   2   4  -7   50.32    4.14
   2   4  -7   52.21    3.93
  -2   4   7   60.40    4.57
   2   4  -7   60.19    4.74
  -2   4   7   59.48    4.29
   2  -4  -7   58.78    6.90
   2  -4  -7   57.73    4.08
  -2  -4   7   53.80    4.54
  -2  -4   7   53.56    5.43
   2  -4  -7   53.20    4.93
  -2  -4   7   49.80    3.67
  -2  -4   7   50.59    3.54
   2   4  -6  621.00   32.19
   2   4  -6  573.56   31.64
   2   4  -6  519.87   28.92
  -2   4   6  584.29   31.24
  -2   4   6  569.72   30.16
  -2   4   6  562.62   37.88
   2  -4  -6  547.82   30.61
   2  -4  -6  618.40   32.17
  -2  -4   6  560.78   29.24
  -2  -4   6  522.88   27.43
   2  -4  -6  548.84   31.61
  -2  -4   6  581.33   31.47
  -2  -4   6  566.71   30.90
   2   4  -5    2.10    1.13
   2   4  -5    2.39    1.30
  -2   4   5    2.50    1.50
  -2   4   5    1.75    1.22
   2   4  -5    2.19    1.32
  -2   4   5    1.57    1.20
   2  -4  -5    0.25    1.38
   2  -4  -5    3.08    1.27
  -2  -4   5    2.04    1.13
  -2  -4   5    2.73    1.28
   2  -4  -5    1.61    1.23
  -2  -4   5    0.83    1.11
  -2  -4   5    2.36    1.15
   2   4  -4  112.91    7.78
  -2   4   4   96.90    7.26
   2   4  -4  102.62    6.24
  -2   4   4  109.54    7.94
   2   4  -4  100.66    6.62
  -2   4   4   91.64    2.45
  -2   4   4  105.83    6.16
  -2  -4   4  102.03    5.50
   2  -4  -4   94.84    6.17
  -2  -4   4  100.54    5.96
   2  -4  -4  100.86    6.66
  -2  -4   4  107.87    5.96
  -2  -4   4  107.08    7.10
   2  -4  -4  102.12    6.07
   2   4  -3  169.50    8.01
   2   4  -3  165.72    8.73
   2   4  -3  168.25    9.90
  -2   4   3  159.91   10.25
  -2   4   3  143.34    4.24
  -2   4   3  173.42    7.97
  -2   4   3  149.08    4.75
  -2   4   3  173.83   11.59
   2  -4  -3  163.77    8.35
   2  -4  -3  166.49    9.05
  -2  -4   3  163.43    9.99
  -2  -4   3  161.97    4.26
  -2  -4   3  163.15    7.40
  -2  -4   3  161.98    8.63
   2  -4  -3  166.18    9.59
   2  -4  -3  157.14    8.49
   2  -4  -3  157.94   10.75
  -2  -4   3  171.99    9.16
   2   4  -2 1355.55   83.47
  -2   4   2 1560.29   89.54
  -2   4   2 1385.97   84.97
   2   4  -2 1350.66   81.05
   2   4  -2 1523.50  103.06
  -2   4   2 1452.89  102.92
   2  -4  -2 1475.81   93.08
   2  -4  -2 1400.28   93.41
  -2  -4   2 1477.68   84.87
   2  -4  -2 1308.35   79.48
  -2  -4   2 1347.54   72.92
  -2  -4   2 1442.31   89.39
   2  -4  -2 1364.78   90.06
  -2  -4   2 1428.43   87.83
  -2  -4   2 1325.99   89.52
   2  -4  -2 1388.98   85.98
   2   4  -1  160.54    8.10
  -2   4   1  153.97    8.26
  -2   4   1  154.57    5.73
   2   4  -1  153.68    7.14
  -2   4   1  156.71    6.48
   2   4  -1  154.06    9.65
  -2   4   1  159.95    8.91
  -2   4   1  152.42   10.27
  -2  -4   1  153.38    8.77
   2  -4  -1  159.28   10.91
   2  -4  -1  151.33    8.52
   2  -4  -1  164.19    8.78
  -2  -4   1  147.00    6.18
  -2  -4   1  158.68   11.53
  -2  -4   1  158.58    6.36
  -2  -4   1  160.76   10.40
   2  -4  -1  152.82    6.65
  -2   4   0   12.23    1.05
   2   4   0   11.20    2.60
  -2   4   0   11.11    2.07
  -2   4   0   10.86    1.11
  -2   4   0   11.91    2.73
  -2   4   0    0.33    3.54
   2   4   0   10.74    1.35
   2   4   0   15.89    1.83
   2  -4   0   11.52    3.26
   2  -4   0   14.84    2.00
   2  -4   0   11.00    1.01
  -2  -4   0   11.96    2.08
  -2  -4   0    9.08    2.20
   2  -4   0    9.69    1.60
  -2  -4   0    9.84    2.92
  -2  -4   0   15.56    2.17
   2  -4   0   13.39    2.83
  -2  -4   0   10.33    1.38
   2   4   1  429.86   18.96
   2   4   1  417.02   20.71
   2   4   1  446.43   19.79
   2   4   1  416.49   23.52
  -2   4  -1  444.10   22.36
  -2   4  -1  437.71   17.96
  -2   4  -1  436.20   19.27
  -2   4  -1  430.05   24.89
   2  -4   1  464.06   26.38
  -2  -4  -1  428.48   25.52
   2  -4   1  462.08   25.58
  -2  -4  -1  407.12   21.69
  -2  -4  -1  402.33   20.04
  -2  -4  -1  405.16   21.16
  -2  -4  -1  388.09   20.73
   2  -4   1  464.05   18.65
   2  -4   1  447.15   22.34
   2  -4   1  419.13   18.78
  -2   4  -2  317.58   14.14
   2   4   2  295.50   16.94
  -2   4  -2  289.04   19.67
   2   4   2  318.16   18.33
   2   4   2  331.43   17.03
  -2   4  -2  313.47   16.01
   2   4   2  291.84   11.36
   2   4   2  294.06   12.47
  -2   4  -2  304.52   21.99
   2  -4   2  299.20   15.24
   2  -4   2  334.27   22.50
   2  -4   2  329.16   10.58
   2  -4   2  295.25   13.71
  -2  -4  -2  291.72   18.31
  -2  -4  -2  283.93   14.61
  -2  -4  -2  292.05   15.27
   2  -4   2  323.87   15.67
  -2  -4  -2  319.62   19.46
   2   4   3    1.31    1.64
   2   4   3    0.41    0.89
  -2   4  -3    1.27    2.09
   2   4   3    2.05    1.46
   2   4   3    1.83    1.08
   2   4   3    1.33    0.75
  -2   4  -3    1.06    1.45
  -2   4  -3    0.25    1.21
  -2   4  -3    1.94    0.84
   2  -4   3    3.27    1.52
   2  -4   3    2.09    1.35
  -2  -4  -3    1.51    1.15
   2  -4   3    2.01    1.03
   2  -4   3    0.58    1.03
  -2  -4  -3    0.94    2.57
  -2  -4  -3    1.74    1.11
  -2  -4  -3    1.12    1.12
   2   4   4  124.95    9.11
  -2   4  -4  116.74    9.68
  -2   4  -4  122.81    5.98
   2   4   4  104.01    4.32
   2   4   4  109.46    6.41
  -2   4  -4  113.32    7.49
  -2   4  -4  114.63    7.27
   2  -4   4  120.26    9.67
  -2  -4  -4  102.55    6.65
  -2  -4  -4  131.09    7.71
   2  -4   4  110.87    5.94
  -2  -4  -4  111.64    6.39
   2  -4   4  106.19    6.21
   2  -4   4  101.39    5.67
  -2  -4  -4  108.65    7.00
  -2   4  -5    5.72    1.28
   2   4   5    6.49    1.65
  -2   4  -5    6.03    1.90
   2   4   5    4.41    0.60
   2   4   5    7.18    1.56
   2   4   5    3.76    0.74
  -2   4  -5    7.02    1.75
  -2   4  -5    4.65    1.62
   2  -4   5    4.05    1.18
   2  -4   5    6.17    1.26
  -2  -4  -5    6.69    1.69
   2  -4   5    5.43    1.59
  -2  -4  -5    5.46    1.63
   2  -4   5    4.01    2.38
  -2  -4  -5    5.33    1.40
  -2  -4  -5    6.49    1.82
   2   4   6   25.56    2.63
   2   4   6   26.68    2.93
  -2   4  -6   20.15    2.78
  -2   4  -6   19.65    2.36
  -2   4  -6   26.74    3.24
  -2   4  -6   23.44    2.89
   2  -4   6   20.73    2.31
   2  -4   6   17.87    2.03
   2  -4   6   21.50    1.99
  -2  -4  -6   22.24    2.78
  -2  -4  -6   22.14    2.73
  -2  -4  -6   20.69    3.28
  -2  -4  -6   26.88    3.53
   2  -4   6   20.99    2.89
   2   4   7  131.57    8.24
   2   4   7  125.20    7.28
  -2   4  -7  116.80    8.44
  -2   4  -7  117.87    7.61
  -2   4  -7  119.04    7.48
  -2   4  -7  127.41    7.18
   2  -4   7  116.14    5.94
  -2  -4  -7  120.69    8.89
   2  -4   7  112.12    5.84
  -2  -4  -7  116.26   10.31
   2  -4   7  115.20    6.33
  -2  -4  -7  131.10    9.88
  -2  -4  -7  132.65    6.92
   2  -4   7  117.21    8.16
  -2   4  -8 1094.77   60.24
   2   4   8  830.51   49.33
  -2   4  -8  784.26   50.94
  -2   4  -8  924.53   55.48
   2   4   8  856.96   56.80
  -2   4  -8  816.92   50.10
   2  -4   8  857.22   46.86
   2  -4   8  892.91   52.72
   2  -4   8  853.61   54.35
  -2  -4  -8  976.23   59.37
  -2  -4  -8  795.27   48.83
   2  -4   8  828.99   47.89
  -2  -4  -8  777.62   52.60
  -2  -4  -8  883.55   50.11
   2   4   9   33.42    3.91
  -2   4  -9   32.84    4.11
   2   4   9   36.60    3.66
  -2   4  -9   31.35    3.48
   2  -4   9   26.46    3.83
   2  -4   9   29.74    4.20
  -2  -4  -9   29.96    3.71
  -2  -4  -9   31.75    4.61
  -2  -4  -9   31.87    4.68
  -2  -4  -9   27.28    2.63
   2   4  10   31.99    3.90
   2   4  10   25.18    3.64
   2  -4  10   26.25    3.95
   2  -4  10   24.97    4.20
  -2  -4 -10   25.30    4.31
   2   4  11   32.67    4.59
   2   4  11   30.46    4.23
   2  -4  11   31.53    4.82
   2  -4  11   25.69    4.30
  -2  -4 -11   29.67    3.27
   2   4  12   23.73    4.02
   2   4  12   19.66    4.15
   2  -4  12   16.86    3.88
   2  -4  12   21.81    4.40
   2   4  13    8.78    3.03
   2   4  13    7.07    3.20
   2  -4  13    5.88    5.14
   2  -4  13    6.80    2.95
   2   4  14  291.10   20.71
   2   4  14  295.13   21.33
   2  -4  14  259.11   19.33
   2  -4  14  259.44   20.79
   2   4  15    3.32    4.51
   2  -4  15    4.57    2.59
   2  -4  15    4.69    2.92
  -2  -4 -15    3.22    2.99
   2   4  16  252.63   18.94
   2  -4  16  189.50   24.15
  -2  -4 -16  228.07   19.15
   2   4  17   43.57    6.11
  -2   4 -17   39.03    6.34
  -2  -4 -17   41.99    6.46
   2  -4  17   35.24    6.63
   2   4  18  217.72   16.11
  -2   4 -18  202.62   16.93
  -2  -4 -18  206.31   17.21
   2  -4  18  174.96   22.24
  -2   4 -19   21.59    7.54
   2   4  19   25.85    4.39
   2  -4  19   20.80    4.77
  -2  -4 -19   22.94    4.71
  -2   4 -20   44.86    6.14
   2   4  20   48.52    5.82
   2  -4  20   36.65    5.79
  -2  -4 -20   41.89    5.60
   2   4  21  115.25    8.66
  -2   4 -21  108.87    8.95
  -2  -4 -21   94.19    8.21
   2  -4  21   95.20   12.69
   2   4  22    9.51    2.24
  -2   4 -22    0.00    3.73
   2  -4  22    6.59    3.40
  -2  -4 -22    5.87    3.09
  -2   6  21   26.85    3.50
   2   6 -21   23.64    3.67
   2  -6 -21   23.24    3.68
  -2  -6  21   23.28    3.15
   2   6 -20   20.40    3.44
  -2   6  20   25.03    3.77
  -2  -6  20   13.45    4.90
   2  -6 -20   17.37    4.23
   2   6 -19   -1.07    1.17
  -2   6  19    1.50    1.28
  -2  -6  19   -0.20    1.13
   2  -6 -19    1.40    2.23
  -2   6  18   13.10    3.52
   2   6 -18    8.37    4.84
   2  -6 -18    9.71    3.60
  -2  -6  18    8.67    2.97
   2   6 -17   24.90    4.66
  -2   6  17   30.30    5.39
   2  -6 -17   25.58    5.37
  -2  -6  17   26.38    4.62
  -2   6  16   11.85    3.57
   2   6 -16    7.93    3.02
   2  -6 -16    8.66    3.85
  -2  -6  16    7.82    3.01
   2   6 -15    7.64    3.31
  -2   6  15   12.87    3.47
  -2   6  15   13.06    3.55
  -2  -6  15    8.94    3.19
   2   6 -14   13.12    3.63
  -2   6  14   16.79    6.27
  -2   6  14   15.47    6.03
  -2  -6  14   12.17    3.47
   2   6 -13    0.50    1.65
  -2   6  13    1.66    1.58
  -2   6  13   -0.51    1.65
   2  -6 -13    0.53    1.30
  -2  -6  13    0.24    2.37
  -2   6  12   84.83    7.78
   2   6 -12   64.61    7.59
  -2   6  12   90.44    7.62
   2  -6 -12   72.94    6.48
   2  -6 -12   55.90    6.15
  -2  -6  12   75.53   10.70
  -2   6  11   66.85    6.52
   2   6 -11   65.07    6.94
  -2   6  11   64.71    6.91
   2  -6 -11   62.84    5.98
   2  -6 -11   51.86    5.56
  -2  -6  11   62.31    6.51
  -2   6  10   36.28    4.83
  -2   6  10   38.97    4.67
   2   6 -10   33.46    4.94
  -2  -6  10   28.40    3.91
  -2  -6  10   33.61    4.68
   2  -6 -10   36.69    4.24
   2  -6 -10   40.22    4.63
   2   6  -9   46.26    5.49
  -2   6   9   50.12    4.97
  -2   6   9   52.73    5.48
   2  -6  -9   50.89    5.22
  -2  -6   9   50.12    5.06
  -2  -6   9   36.68    4.48
   2  -6  -9   44.60    4.83
   2   6  -8   72.21    6.39
  -2   6   8   69.87    5.78
   2   6  -8   62.84    6.42
  -2   6   8   65.93    6.22
   2  -6  -8   74.43    6.81
   2  -6  -8   69.80    6.12
  -2  -6   8   58.40    5.53
  -2  -6   8   67.84    6.04
  -2   6   7   16.59    2.97
   2   6  -7   12.52    2.98
  -2   6   7   17.33    2.68
   2   6  -7   15.02    2.95
   2  -6  -7   10.91    2.81
  -2  -6   7   15.85    2.55
  -2  -6   7   -0.02    3.98
   2  -6  -7   10.57    5.25
   2   6  -6   25.14    3.72
   2   6  -6   24.74    2.78
  -2   6   6   21.87    3.04
   2   6  -6   27.16    3.55
  -2   6   6   22.96    5.29
   2  -6  -6   19.59    4.07
  -2  -6   6   21.17    3.20
   2  -6  -6   20.42    3.50
  -2  -6   6   23.41    2.93
   2   6  -5   38.65    3.57
   2   6  -5   35.32    4.25
  -2   6   5   42.36    5.78
  -2   6   5   40.91    3.63
   2   6  -5   38.39    4.75
  -2   6   5   39.84    4.39
   2  -6  -5   41.09    4.48
  -2  -6   5   42.79    3.49
  -2  -6   5   37.95    4.18
   2  -6  -5   31.04    5.77
   2   6  -4   37.20    4.74
   2   6  -4   31.46    3.20
  -2   6   4   40.68    3.25
   2   6  -4   30.14    5.76
  -2   6   4   37.68    4.01
  -2   6   4   36.04    5.25
   2  -6  -4   29.10    3.42
  -2  -6   4   27.63    5.92
   2  -6  -4   36.12    4.21
  -2  -6   4   30.30    2.67
  -2   6   3    1.61    1.43
   2   6  -3    1.14    1.78
   2   6  -3    2.15    1.43
   2   6  -3    2.66    1.06
  -2   6   3    1.98    1.97
  -2  -6   3    1.02    0.91
  -2  -6   3    1.04    1.48
   2  -6  -3    2.99    1.57
   2   6  -2    9.10    4.29
   2   6  -2    7.91    2.02
  -2   6   2    7.67    2.94
  -2   6   2    7.37    2.16
   2  -6  -2   10.09    2.40
  -2  -6   2    6.79    2.27
   2   6  -1    1.51    1.61
   2   6  -1    1.33    1.19
  -2   6   1    0.23    1.72
  -2   6   1    0.25    1.22
  -2  -6   1    1.36    1.33
   2   6   0   74.60    7.26
  -2   6   0   69.77    7.16
   2   6   0   69.02    5.44
  -2   6   0   65.85    5.58
  -2  -6   0   66.55    5.89
   2  -6   0   72.35    6.03
   2   6   1   91.36    6.43
  -2   6  -1   85.75    6.88
  -2   6  -1   84.70    8.16
  -2  -6  -1   87.15    6.93
   2   6   2  157.18   12.81
  -2   6  -2  147.25   10.01
  -2   6  -2  161.32   11.90
   2  -6   2  141.50    9.82
  -2  -6  -2  173.64   12.02
   2   6   3   89.29    5.43
   2   6   3   88.14    8.94
  -2   6  -3   90.73   11.55
  -2   6  -3   79.65    6.88
   2  -6   3   77.06    9.03
  -2  -6  -3   73.98    6.08
  -2  -6  -3   92.33    7.90
   2   6   4    0.70    1.16
   2   6   4    1.92    1.41
  -2   6  -4    2.24    1.01
  -2   6  -4    0.96    1.59
  -2   6  -4    0.36    2.71
   2  -6   4    2.10    1.31
  -2  -6  -4    1.21    1.68
  -2  -6  -4    1.26    1.35
   2  -6   4    1.29    1.07
   2   6   5    3.18    1.33
  -2   6  -5    4.05    2.95
  -2   6  -5   -0.23    1.74
   2   6   5    2.82    1.52
  -2   6  -5    2.51    1.88
  -2  -6  -5   -0.83    2.48
  -2  -6  -5    1.84    2.93
   2  -6   5    2.94    1.29
   2  -6   5   -0.01    1.39
   2   6   6  868.29   53.41
  -2   6  -6  832.25   55.74
   2   6   6  884.13   54.47
  -2   6  -6  868.48   57.69
   2  -6   6  716.37   46.51
  -2  -6  -6  848.89   54.18
   2  -6   6  928.46   62.65
  -2  -6  -6  867.12   55.90
   2   6   7    2.18    1.41
  -2   6  -7    1.46    1.63
   2   6   7    3.02    1.53
  -2   6  -7   -0.66    1.76
  -2  -6  -7    1.96    1.35
   2  -6   7    0.04    1.26
   2  -6   7    1.09    1.46
  -2  -6  -7    1.85    1.65
   2   6   8  228.09   13.92
   2   6   8  224.41   13.86
  -2   6  -8  201.29   14.79
  -2   6  -8  205.25   14.51
   2  -6   8  199.97   13.91
   2  -6   8  160.17   11.53
  -2  -6  -8  198.11   13.17
  -2  -6  -8  201.32   17.72
   2   6   9    2.43    1.93
   2   6   9    2.92    1.96
  -2   6  -9    3.13    2.22
   2  -6   9    1.37    1.87
  -2  -6  -9    1.39    1.57
  -2  -6  -9    3.07    1.84
   2   6  10  148.29   11.28
   2   6  10  151.14   11.32
  -2   6 -10  121.41   11.44
   2  -6  10  138.30   11.32
  -2  -6 -10  147.04   10.51
   2   6  11   13.16    3.41
   2   6  11   13.67    3.46
  -2   6 -11   13.78    3.71
   2  -6  11   12.61    3.35
  -2  -6 -11   10.02    2.88
   2   6  12   33.40    7.35
  -2   6 -12   23.24    4.80
   2  -6  12   24.67    4.58
  -2  -6 -12   26.29    5.36
  -2  -6 -12   23.15    3.98
   2   6  13    3.77    1.93
  -2   6 -13   -0.14    1.92
  -2  -6 -13    2.06    2.07
   2  -6  13   -1.14    1.79
   2   6  14   39.79    6.04
  -2   6 -14   38.16    5.93
   2  -6  14   36.83    5.65
  -2  -6 -14   49.36   10.21
   2   6  15   36.76    5.43
  -2   6 -15   22.36    5.08
   2  -6  15   27.90    4.85
  -2  -6 -15   27.31    5.54
  -2   6 -16    1.08    1.54
   2   6  16    0.82    1.60
   2  -6  16   -0.22    1.38
  -2  -6 -16   -0.95    2.74
   2   6  17   53.31    5.89
  -2   6 -17   44.13    5.92
  -2  -6 -17   48.01    6.68
   2  -6  17   37.79    5.61
   2   6  18    7.54    2.51
  -2   6 -18    0.01    2.57
  -2  -6 -18   10.45    2.69
   2  -6  18    5.54    3.57
   2   6  19   25.22    3.63
  -2   6 -19   28.08    5.67
   2  -6  19   17.26    3.24
  -2  -6 -19   19.67    3.70
   2   8 -17   18.83    2.77
  -2   8  17   22.63    3.43
   2  -8 -17   17.43    2.90
  -2  -8  17   15.14    1.87
  -2   8  16   10.25    3.23
   2   8 -16   10.32    2.41
   2  -8 -16   12.20    2.66
  -2  -8  16   10.24    2.88
  -2   8  15   21.79    3.80
   2   8 -15   16.95    2.98
   2  -8 -15   15.03    3.40
  -2  -8  15   12.56    2.19
  -2   8  14    6.95    2.75
   2   8 -14    4.51    2.26
   2  -8 -14    7.75    3.87
  -2  -8  14    5.68    1.65
  -2   8  13   50.45    8.88
   2   8 -13   35.99    4.99
   2  -8 -13   45.65    5.54
  -2  -8  13   37.75    3.95
   2  -8 -13   38.69    4.53
   2   8 -12    4.68    2.19
  -2   8  12    5.83    2.54
   2  -8 -12    4.71    2.40
   2  -8 -12    3.17    1.89
   2  -8 -12    5.56    2.03
  -2  -8  12    4.25    1.68
   2   8 -11  115.05    9.96
  -2   8  11  130.88   10.43
   2  -8 -11   93.07    8.92
   2  -8 -11  107.75   10.46
   2  -8 -11  138.60    9.77
   2   8 -10    5.67    3.95
  -2   8  10    9.08    2.77
   2  -8 -10    7.12    2.74
   2  -8 -10    7.61    2.46
   2  -8 -10    7.13    2.65
  -2  -8  10    4.34    2.47
   2   8  -9   11.08    3.00
  -2   8   9   14.15    3.17
   2  -8  -9   10.67    3.08
  -2  -8   9    9.24    2.81
   2  -8  -9   12.36    2.96
   2   8  -8    7.63    2.59
  -2   8   8    9.06    4.32
   2  -8  -8    6.57    2.92
   2  -8  -8    8.83    2.61
  -2  -8   8    6.24    2.64
  -2   8   7    9.03    2.84
   2   8  -7    7.46    2.62
   2  -8  -7    8.33    5.00
  -2  -8   7    6.77    2.64
  -2  -8   7    7.13    2.79
   2  -8  -7    6.51    2.77
  -2   8   6  101.52    9.05
   2   8  -6   99.99    8.60
   2  -8  -6   96.28    9.84
  -2  -8   6   86.02    8.46
  -2  -8   6   95.94    9.20
   2  -8  -6   87.36    9.11
   2   8  -5   29.03    4.71
  -2   8   5   34.95    5.18
   2  -8  -5   32.02    5.38
   2  -8  -5   37.48    6.51
  -2  -8   5   34.31    5.24
  -2  -8   5   33.87    5.17
   2   8  -4   49.31    6.16
  -2   8   4   50.66   10.18
   2  -8  -4   54.47    7.81
   2  -8  -4   88.07    8.44
  -2  -8   4   58.70    7.11
  -2  -8   4   43.57   11.00
   2   8  -3   39.62    5.28
  -2   8   3   43.82    5.62
  -2  -8   3   37.46    6.11
   2  -8  -3   38.30    6.59
  -2  -8   3   38.26    5.55
   2  -8  -2   67.84    8.81
   2  -8  -2   69.21    7.83
  -2  -8   2   73.75    7.83
  -2  -8   2   74.64    8.28
   2  -8  -1  175.40   14.44
   2  -8  -1  203.77   16.48
  -2  -8   1  201.73   15.84
   2  -8   0   17.53    4.63
  -2  -8   0   19.09    4.73
   2   8   1  443.65   30.13
  -2   8  -1  485.39   32.54
  -2  -8  -1  421.88   30.55
   2  -8   1  442.50   32.05
  -2  -8  -1  431.00   30.81
   2   8   2  450.48   35.74
  -2   8  -2  444.36   29.86
   2  -8   2  408.10   29.59
   2  -8   2  390.15   28.00
  -2  -8  -2  397.92   29.21
  -2  -8  -2  418.02   29.73
   2   8   3   82.77    7.89
  -2   8  -3   82.78    8.01
   2  -8   3   83.43    8.75
   2  -8   3   73.23    7.78
  -2  -8  -3   82.32    9.25
  -2  -8  -3   85.77    8.63
   2   8   4   18.81    3.34
  -2   8  -4    9.86    3.49
   2  -8   4   13.86    3.78
   2  -8   4    9.93    3.55
  -2  -8  -4   14.76    4.01
  -2  -8  -4   14.08    3.57
  -2   8  -5  154.30   12.41
   2   8   5  156.61   11.65
   2  -8   5  131.30   11.72
  -2  -8  -5  155.08   12.46
  -2  -8  -5  168.83   13.48
   2  -8   5  167.02   13.30
   2   8   6  110.47   12.34
  -2   8  -6  104.59    9.37
   2  -8   6  103.20    9.77
   2  -8   6   90.17    8.61
  -2  -8  -6  113.53    9.88
  -2  -8  -6  104.31    9.61
   2   8   7   56.38    5.77
  -2   8  -7   48.93    6.15
   2  -8   7   52.94    6.43
   2  -8   7   43.08    8.39
  -2  -8  -7   53.69    6.31
  -2  -8  -7   50.38    8.71
   2   8   8  106.00    8.81
  -2   8  -8   87.37   12.87
  -2  -8  -8   90.13    8.64
  -2  -8  -8  108.18    9.06
   2   8   9   27.11    4.04
  -2   8  -9   17.66    3.96
  -2  -8  -9   13.30    3.86
  -2  -8  -9   15.47    3.25
  -2  -8  -9   24.49    3.74
   2   8  10    6.80    2.45
  -2   8 -10    4.20    2.45
  -2  -8 -10    3.81    2.01
  -2  -8 -10    4.25    3.55
  -2  -8 -10    4.70    2.41
   2   8  11    4.38    3.82
  -2   8 -11    3.90    2.40
  -2  -8 -11    6.46    2.09
  -2  -8 -11    3.28    2.37
   2   8  12    0.52    1.22
  -2   8 -12    1.12    1.14
  -2  -8 -12    0.17    1.69
  -2  -8 -12   -1.13    1.02
  -2   8 -13   47.38    5.36
   2   8  13   58.02    5.90
   2  -8  13   36.08    3.71
  -2  -8 -13   48.02    5.19
  -2  -8 -13   44.99    6.59
  -2   8 -14    5.29    2.18
   2   8  14    8.16    2.44
   2  -8  14    3.44    1.29
  -2  -8 -14    9.28    3.19
   2   8  15    7.14    2.50
  -2   8 -15    2.67    3.39
   2  -8  15    7.81    1.15
  -2  -8 -15    7.04    2.16
  -2  10  10    0.39    1.07
   2  10 -10    0.17    0.83
   2 -10 -10   -0.56    1.57
   2  10  -9   73.94    5.55
  -2  10   9   91.04    6.68
   2 -10  -9   81.96    6.28
   2 -10  -9   74.73    6.30
   2  10  -8    0.01    1.50
  -2  10   8    1.19    1.10
   2 -10  -8    0.23    1.14
   2 -10  -8   -0.76    1.04
  -2 -10   8    0.45    0.92
   2  10  -7   -0.30    0.78
  -2  10   7   -1.08    0.86
   2 -10  -7    2.14    1.41
   2 -10  -7   -0.23    0.93
  -2 -10   7    0.47    0.56
  -2 -10   7   -0.22    0.79
   2  10  -6   44.53    4.45
  -2  10   6   55.39    4.85
   2 -10  -6   47.82    5.23
  -2 -10   6   34.85    4.81
   2 -10  -6   44.54    5.29
  -2 -10   6   32.48    4.10
   2  10  -5   27.99    3.71
  -2  10   5   27.95    3.70
   2 -10  -5   35.97    6.80
   2 -10  -5   27.31    4.42
  -2 -10   5   21.40    3.85
  -2 -10   5   25.59    3.64
   2  10  -4   -0.05    2.08
  -2  10   4   -0.05    1.38
   2 -10  -4    2.10    1.55
  -2 -10   4    0.51    1.31
   2 -10  -4    0.73    1.60
   2  10  -3    0.01    2.34
  -2  10   3    8.05    2.39
   2 -10  -3    5.45    2.80
  -2 -10   3    6.94    2.39
   2 -10  -3   12.23    2.70
   2  10  -2   27.64    3.78
   2 -10  -2   21.33    4.32
   2 -10  -2   31.03    6.79
  -2 -10   2   21.14    4.01
  -2 -10   2   22.06    4.08
   2 -10  -1   -1.62    1.84
   2 -10  -1   -0.77    1.13
  -2 -10   1    1.34    1.09
   2 -10   0   32.68    5.01
  -2 -10   0   28.49    4.53
   2  10   1   -3.72    1.30
   2 -10   1   -0.64    1.43
   2 -10   1    4.92    1.43
  -2 -10  -1    3.96    2.22
   2  10   2   26.97    5.77
  -2  10  -2   26.15    4.03
   2 -10   2   27.93    4.19
  -2 -10  -2   31.79    4.37
   2 -10   2   11.79    6.44
   2  10   3   -0.97    1.02
  -2  10  -3   -0.28    1.15
   2 -10   3   -0.24    1.13
  -2 -10  -3    1.37    1.29
   2 -10   3   -0.25    1.15
   2  10   4   28.45    3.68
  -2  10  -4   28.57    3.89
   2 -10   4   11.01    5.69
   2 -10   4   24.91    5.40
  -2 -10  -4   32.15    6.52
   2  10   5   10.60    3.32
  -2  10  -5    0.06    2.22
   2 -10   5    9.07    1.91
   2 -10   5    3.57    2.02
  -2 -10  -5   11.76    2.52
  -2 -10  -5    8.30    3.71
  -2  10  -6   -0.05    1.73
   2  10   6    6.35    1.72
   2 -10   6    3.28    1.99
  -2 -10  -6    3.95    1.72
   2 -10   6    2.32    1.49
  -2 -10  -6    7.73    3.20
   2  10   7   -0.32    0.82
  -2  10  -7    0.26    0.82
  -2 -10  -7    0.06    0.78
  -2 -10  -7    0.05    0.92
   2  10   8    1.51    1.40
  -2  10  -8    0.20    1.22
  -2 -10  -8    1.07    0.91
  -2 -10  -8    2.17    1.52
  -3   1  25   37.69    4.35
  -3  -1  25   34.97    6.78
  -3   1  24   29.25    4.03
  -3  -1  24   26.85    3.98
  -3  -1  24   15.66    2.98
  -3   1  23    8.19    4.32
  -3  -1  23    9.34    2.69
  -3  -1  23    3.36    2.47
  -3   1  22   75.98    7.83
  -3  -1  22   75.30    7.65
  -3  -1  22   58.40    7.74
  -3   1  21  171.40   13.25
  -3  -1  21  170.04   17.65
  -3  -1  21  136.30   13.19
  -3   1  20   52.59    6.51
   3  -1 -20   43.94    5.88
  -3  -1  20   40.07    6.27
  -3  -1  20   50.19    6.24
  -3   1  19   94.41   13.03
   3  -1 -19   86.29    8.88
  -3  -1  19   96.85   12.61
  -3  -1  19   86.32    9.35
  -3   1  18    2.00    2.09
   3  -1 -18    3.14    1.92
  -3  -1  18    2.14    3.41
  -3  -1  18    1.44    2.03
  -3   1  17   15.59    2.81
  -3   1  17    6.53    4.56
  -3   1  17   12.57    3.25
  -3  -1  17   10.67    3.33
  -3  -1  17   10.88    4.93
  -3   1  16   37.47    4.11
  -3   1  16   37.80    4.81
  -3   1  16   32.01    4.34
  -3  -1  16   33.88    4.53
  -3  -1  16   34.09    7.58
  -3   1  15   14.13    2.77
  -3   1  15   19.07    2.66
  -3   1  15   18.92    3.25
  -3  -1  15   18.69    3.50
  -3  -1  15   18.02    3.07
   3  -1 -15   15.14    1.91
   3   1 -14   19.38    2.91
   3   1 -14   20.26    2.57
  -3   1  14   29.27    3.51
  -3   1  14   22.77    2.87
   3   1 -14   11.95    2.23
  -3   1  14   26.21    4.46
   3  -1 -14   24.40    2.03
   3  -1 -14   19.03    2.88
  -3  -1  14   22.86    3.53
  -3  -1  14   23.06    3.14
   3   1 -13  121.00    6.68
  -3   1  13  129.84    8.17
   3   1 -13  127.73    7.70
   3   1 -13  139.36    7.47
  -3   1  13  139.83    8.03
  -3   1  13  143.40    9.11
   3  -1 -13  110.90    7.26
   3  -1 -13  120.15    5.97
  -3  -1  13  120.70    8.02
  -3  -1  13  129.01    9.05
  -3  -1  13  130.82    6.15
   3   1 -12  740.35   41.38
   3   1 -12  725.67   38.51
  -3   1  12  745.50   43.86
   3   1 -12  892.11   49.74
  -3   1  12  779.24   43.01
  -3   1  12  736.39   34.30
  -3   1  12  741.75   41.80
   3  -1 -12  705.98   35.70
  -3  -1  12  736.89   41.84
   3  -1 -12  666.24   37.91
  -3  -1  12  787.91   39.13
  -3  -1  12  742.14   44.73
  -3   1  11  189.64    9.68
  -3   1  11  173.12    8.80
   3   1 -11  157.12    8.77
  -3   1  11  185.84    6.83
   3   1 -11  173.80    6.53
   3   1 -11  166.85    7.63
   3   1 -11  170.65    8.57
  -3   1  11  179.53   10.32
   3  -1 -11  162.05    5.44
   3  -1 -11  157.87    8.52
   3  -1 -11  173.51    7.20
  -3  -1  11  176.85   10.42
   3  -1 -11  166.32    5.98
  -3  -1  11  180.59    6.01
  -3  -1  11  169.40    7.04
  -3  -1  11  151.58   11.62
   3   1 -10   84.11    4.94
   3   1 -10   77.70    5.14
   3   1 -10   77.72    5.07
  -3   1  10   88.95    3.46
  -3   1  10   85.56    4.79
   3   1 -10   89.08    3.73
  -3   1  10  100.68    8.42
   3  -1 -10   88.47    3.74
   3  -1 -10   88.88    3.75
   3  -1 -10   73.88    2.96
  -3  -1  10   85.58    8.58
  -3  -1  10   71.03    5.10
  -3  -1  10   89.17    3.04
  -3  -1  10   87.12    4.91
   3  -1 -10   80.81    4.95
  -3   1   9   32.22    2.78
   3   1  -9   31.27    2.71
   3   1  -9   34.19    2.56
  -3   1   9   36.66    2.89
   3   1  -9   28.87    2.54
  -3   1   9   34.41    3.31
   3   1  -9   36.48    1.97
  -3   1   9   36.26    1.65
   3  -1  -9   32.57    2.13
  -3  -1   9   34.61    1.44
   3  -1  -9   33.16    2.54
  -3  -1   9   30.71    2.60
   3  -1  -9   35.72    1.72
  -3  -1   9   32.33    4.80
  -3  -1   9   33.07    1.71
   3  -1  -9   30.88    2.94
   3   1  -8   13.12    0.77
   3   1  -8   10.36    2.16
   3   1  -8   11.25    0.98
   3   1  -8   12.57    1.52
  -3   1   8   10.39    1.12
  -3   1   8   11.09    0.90
  -3   1   8   12.58    1.50
  -3   1   8   12.32    1.60
   3  -1  -8    9.57    1.40
   3  -1  -8   11.02    0.67
   3  -1  -8   12.06    1.68
  -3  -1   8   12.05    0.87
   3  -1  -8   10.55    0.82
  -3  -1   8   11.51    0.25
  -3  -1   8    9.32    1.43
   3  -1  -8   12.85    0.81
  -3  -1   8   11.25    1.82
  -3  -1   8   11.47    1.27
   3   1  -7 1947.64  117.04
  -3   1   7 1957.28  121.73
  -3   1   7 2080.35  124.97
  -3   1   7 2143.11  125.56
   3   1  -7 1771.05  111.60
   3   1  -7 1999.47  125.65
   3   1  -7 2136.42  123.45
  -3   1   7 2061.62  130.65
   3  -1  -7 2114.99  121.26
   3  -1  -7 2150.34  123.19
  -3  -1   7 1914.07  113.58
   3  -1  -7 1979.02  127.78
  -3  -1   7 1805.04  113.59
   3  -1  -7 1845.08  114.90
   3  -1  -7 1870.56  110.82
  -3  -1   7 2077.47  120.00
  -3  -1   7 1603.50   87.72
  -3   1   6  411.93   19.55
  -3   1   6  435.34   21.59
   3   1  -6  457.81   20.61
   3   1  -6  452.99   17.03
  -3   1   6  425.82   16.71
   3   1  -6  422.96   15.71
  -3   1   6  437.34   17.14
   3   1  -6  367.73   19.52
   3  -1  -6  421.60   18.16
   3  -1  -6  392.99   15.44
  -3  -1   6  397.52   15.87
   3  -1  -6  414.16   20.00
  -3  -1   6  438.99   14.62
  -3  -1   6  420.88   20.12
  -3  -1   6  439.12   15.87
  -3  -1   6  401.78   18.03
   3  -1  -6  425.02   16.40
   3   1  -5 2180.50  134.72
   3   1  -5 2020.90  130.43
   3   1  -5 2184.62  129.68
   3   1  -5 2346.36  154.56
  -3   1   5 2238.41  142.48
  -3   1   5 2311.26  153.07
  -3   1   5 2269.35  140.87
  -3   1   5 2521.05  151.10
  -3   1   5 2425.05  150.60
   3  -1  -5 2240.30  134.28
   3  -1  -5 2232.69  141.60
   3  -1  -5 2145.27  144.62
  -3  -1   5 2251.24  131.95
  -3  -1   5 2133.59  137.04
  -3  -1   5 2307.87  153.18
  -3  -1   5 2305.41  136.20
  -3  -1   5 1890.32  123.76
  -3   1   4 5748.66  500.82
  -3   1   4 5734.27  517.84
   3   1  -4 5510.62  453.48
  -3   1   4 5508.56  478.12
   3   1  -4 5212.07  449.31
   3   1  -4 5824.43  515.27
  -3   1   4 5296.05  458.04
  -3   1   4 5909.91  491.42
   3  -1  -4 5198.83  428.25
  -3  -1   4 5175.08  449.40
   3  -1  -4 5690.41  507.32
   3  -1  -4 5574.01  482.37
  -3  -1   4 4938.60  428.00
  -3  -1   4 5710.31  483.84
  -3  -1   4 6120.41  548.68
  -3  -1   4 5852.20  483.10
  -3   1   3  907.37   42.26
  -3   1   3  908.74   40.01
   3   1  -3  901.43   40.34
   3   1  -3  902.90   39.86
   3   1  -3  908.94   35.49
  -3   1   3  885.74   41.85
  -3   1   3  878.99   43.56
   3   1  -3  880.72   41.25
   3  -1  -3  907.20   41.79
   3  -1  -3  909.14   42.05
   3  -1  -3  882.43   39.06
  -3  -1   3  901.06   39.81
   3  -1  -3  789.30   29.12
  -3  -1   3  954.01   44.01
  -3  -1   3  915.53   39.65
  -3  -1   3  953.56   41.87
  -3  -1   3  909.98   35.68
   3  -1  -3  875.73   41.47
  -3   1   2 1412.96   73.95
   3   1  -2 1545.42   77.41
   3   1  -2 1577.73   77.23
   3   1  -2 1495.22   76.27
  -3   1   2 1386.81   68.99
   3   1  -2 1422.04   71.40
  -3   1   2 1377.69   69.32
  -3   1   2 1455.81   76.67
   3  -1  -2 1371.45   71.76
   3  -1  -2 1493.12   74.31
  -3  -1   2 1258.57   58.92
  -3  -1   2 1600.74   80.09
  -3  -1   2 1496.64   76.21
   3  -1  -2 1324.83   68.84
  -3  -1   2 1231.17   57.60
   3  -1  -2 1191.08   51.96
   3  -1  -2 1345.72   67.63
  -3  -1   2 1430.86   71.75
   3   1  -1  128.82    4.29
   3   1  -1  132.47    4.03
  -3   1   1  158.03    4.52
   3   1  -1  128.47    4.10
  -3   1   1  159.76    4.66
  -3   1   1  151.70    5.12
   3  -1  -1  149.89    6.36
   3  -1  -1  153.93    4.66
  -3  -1   1  138.32    4.74
  -3  -1   1  130.17    4.25
  -3  -1   1  131.69    3.83
  -3  -1   1  125.41    3.69
  -3  -1   1  128.29    3.55
   3  -1  -1  152.55    4.38
  -3  -1   1  125.92    4.00
  -3   1   0   22.13    0.87
   3   1   0   27.26    1.11
  -3   1   0   19.87    1.37
  -3   1   0   20.62    0.82
  -3   1   0   19.56    1.06
  -3   1   0   17.16    0.97
   3  -1   0   18.06    0.91
   3  -1   0   18.13    0.88
  -3  -1   0   28.84    1.47
   3  -1   0   20.24    2.07
   3  -1   0   18.67    1.10
  -3  -1   0   27.54    1.28
  -3  -1   0   28.70    1.67
   3  -1   0   19.90    1.18
   3   1   1   60.31    2.38
   3   1   1   60.22    2.30
   3   1   1   56.08    2.94
   3   1   1   61.24    4.10
  -3   1  -1   72.43    2.13
  -3   1  -1   70.16    3.20
  -3   1  -1   69.38    2.82
  -3   1  -1   73.58    2.59
   3  -1   1   72.14    2.20
   3  -1   1   69.96    2.80
   3  -1   1   70.55    2.87
   3  -1   1   73.97    2.82
  -3  -1  -1   62.01    3.36
  -3  -1  -1   60.57    2.73
  -3  -1  -1   67.06    3.25
   3  -1   1   72.76    4.49
  -3  -1  -1   58.75    2.82
  -3  -1  -1   72.91    2.50
  -3   1  -2    8.05    1.51
   3   1   2    7.72    1.76
  -3   1  -2    7.73    1.52
  -3   1  -2   12.28    1.44
   3   1   2    9.21    1.14
   3   1   2    9.77    1.32
  -3   1  -2    7.65    0.96
   3  -1   2   10.49    0.80
   3  -1   2    8.61    1.39
  -3  -1  -2    8.75    2.89
  -3  -1  -2    9.44    1.32
   3  -1   2    9.07    1.59
   3  -1   2    7.64    1.56
  -3  -1  -2    9.45    1.21
  -3  -1  -2   12.16    1.73
  -3  -1  -2   10.31    1.44
   3  -1   2    9.17    0.85
   3   1   3 6657.08  664.56
  -3   1  -3 7244.24  739.54
   3   1   3 7518.77  745.89
  -3   1  -3 8250.38  813.48
   3   1   3 8114.80  809.64
  -3   1  -3 7799.36  775.03
  -3   1  -3 6651.70  649.13
   3  -1   3 6551.70  661.86
   3  -1   3 7540.44  742.31
   3  -1   3 7289.29  691.72
   3  -1   3 7967.68  751.47
  -3  -1  -3 8339.31  796.13
   3  -1   3 7771.16  779.67
  -3  -1  -3 6853.40  675.14
  -3  -1  -3 7232.67  715.26
  -3  -1  -3 7822.02  788.61
  -3  -1  -3 7527.13  746.84
  -3   1  -4 3706.51  280.94
  -3   1  -4 3386.96  249.10
   3   1   4 3336.99  246.64
  -3   1  -4 3748.56  282.10
  -3   1  -4 3759.03  278.86
   3   1   4 3374.55  254.32
   3   1   4 3652.54  276.14
   3  -1   4 3040.45  234.43
   3  -1   4 3298.94  228.37
   3  -1   4 3578.30  262.67
  -3  -1  -4 3352.60  253.49
   3  -1   4 3448.50  236.16
   3  -1   4 3625.76  276.33
  -3  -1  -4 3693.00  258.73
  -3  -1  -4 3400.10  250.19
  -3  -1  -4 3582.80  268.88
  -3  -1  -4 3709.73  284.76
   3   1   5  136.69    5.99
  -3   1  -5  133.18    6.55
   3   1   5  138.88    6.79
  -3   1  -5  135.86    6.33
   3   1   5  151.61    6.64
  -3   1  -5  134.06    5.78
  -3   1  -5  140.09    6.47
   3  -1   5  144.87    3.41
   3  -1   5  137.25    6.69
  -3  -1  -5  147.85    6.72
   3  -1   5  139.78    3.43
  -3  -1  -5  145.03    5.43
  -3  -1  -5  159.81    4.86
  -3  -1  -5  126.66    5.81
   3  -1   5  129.09    6.18
  -3  -1  -5  143.18    6.94
   3  -1   5  114.30    4.72
  -3   1  -6  307.22   12.28
   3   1   6  292.74   13.19
   3   1   6  294.01   13.61
   3   1   6  290.48   12.47
  -3   1  -6  301.17   12.04
  -3   1  -6  330.57   14.88
  -3   1  -6  349.36   14.53
   3  -1   6  288.75   14.17
  -3  -1  -6  297.50   12.23
   3  -1   6  313.84   12.03
   3  -1   6  315.45   14.24
  -3  -1  -6  293.41   12.03
  -3  -1  -6  333.21   10.78
  -3  -1  -6  285.43    8.86
  -3  -1  -6  261.61   12.23
   3   1   7 1888.19  118.93
   3   1   7 1910.17  122.47
   3   1   7 1816.91  115.28
  -3   1  -7 2050.53  126.29
  -3   1  -7 1727.12  106.49
  -3   1  -7 1813.12  117.12
  -3   1  -7 1761.87  107.59
  -3  -1  -7 1760.60  108.13
  -3  -1  -7 2102.54  110.57
   3  -1   7 1705.69  114.20
   3  -1   7 1726.83  112.10
  -3  -1  -7 1708.16   91.22
  -3  -1  -7 1486.34   97.95
  -3  -1  -7 1928.49  116.95
   3  -1   7 1606.44   96.28
  -3   1  -8   36.14    2.82
   3   1   8   32.15    3.05
  -3   1  -8   30.35    3.23
   3   1   8   30.43    3.32
   3   1   8   32.19    2.77
  -3   1  -8   30.35    1.98
  -3   1  -8   32.31    2.29
   3  -1   8   31.90    3.28
  -3  -1  -8   30.53    1.96
  -3  -1  -8   30.26    2.34
  -3  -1  -8   27.71    2.87
   3  -1   8   33.79    3.59
  -3   1  -9  804.87   43.25
  -3   1  -9  797.15   42.46
   3   1   9  817.91   49.65
   3   1   9  892.53   49.41
   3   1   9  848.00   49.15
  -3   1  -9  914.50   48.51
  -3   1  -9  887.71   49.42
   3  -1   9  859.67   48.34
   3  -1   9  702.89   34.68
  -3  -1  -9  807.13   45.04
  -3  -1  -9  798.89   40.31
   3  -1   9  847.22   50.35
  -3  -1  -9  813.77   42.79
   3   1  10    2.23    1.30
  -3   1 -10    1.95    0.93
   3   1  10    1.79    1.21
   3   1  10    2.04    1.48
  -3   1 -10    1.43    1.12
  -3  -1 -10    3.14    1.18
   3  -1  10    0.57    1.40
  -3  -1 -10    0.06    1.09
   3  -1  10    2.53    1.49
  -3  -1 -10    2.61    0.93
   3   1  11  144.24    9.29
   3   1  11  147.91    9.07
  -3   1 -11  146.08    8.96
  -3   1 -11  146.13    8.26
   3   1  11  163.93   10.25
  -3   1 -11  145.26    7.91
   3  -1  11  149.55   10.47
   3  -1  11  151.37   13.00
  -3  -1 -11  143.37    8.65
  -3  -1 -11  140.02    7.47
   3   1  12   93.54    7.34
   3   1  12  102.80    7.64
   3   1  12  110.19    7.21
  -3   1 -12   99.62    7.15
  -3   1 -12   92.88    7.42
  -3   1 -12   88.66    6.18
  -3  -1 -12  105.13    7.12
  -3  -1 -12   97.42    5.66
   3  -1  12   99.07    7.38
   3  -1  12   93.07    8.22
   3   1  13   95.52   10.64
   3   1  13   83.24   10.25
   3  -1  13   86.38    7.04
   3  -1  13   81.24    8.29
  -3  -1 -13   91.16    7.42
   3   1  14   58.97    6.56
   3   1  14   67.32    6.52
   3  -1  14   57.90    7.19
   3  -1  14   65.62    9.55
  -3  -1 -14   74.56    9.51
   3   1  15  133.50   11.93
   3   1  15  165.92   12.40
   3  -1  15  162.87   12.28
   3  -1  15  137.45   12.64
  -3  -1 -15  149.98   12.02
   3   1  16    0.93    1.89
   3   1  16    0.69    1.72
   3  -1  16    2.23    1.88
   3  -1  16    0.07    3.18
  -3  -1 -16    1.41    1.69
   3   1  17   20.52    4.26
   3   1  17   13.75    4.22
   3  -1  17   22.19    4.34
   3  -1  17   19.17    4.58
  -3  -1 -17   19.30    5.88
   3   1  18   26.14    3.74
   3   1  18   11.25    5.46
   3  -1  18   15.68    3.68
   3  -1  18    9.09    3.85
  -3  -1 -18    1.10    3.03
   3   1  19  104.81    9.37
   3  -1  19   83.87    9.86
   3  -1  19  111.06    9.53
  -3  -1 -19   83.74    7.94
   3   1  20    5.36    2.64
   3  -1  20    2.48    4.27
   3  -1  20    7.12    4.32
   3   1  21   14.43    3.54
   3  -1  21   15.50    3.62
   3  -1  21   11.04    3.37
   3   1  22    2.88    1.89
   3  -1  22    2.25    1.92
   3  -1  22    1.35    2.70
   3   1  23    1.63    1.28
   3  -1  23    1.30    1.32
   3  -1  23   -0.11    0.86
   3   3 -24   -0.00    1.31
  -3   3  24    1.28    1.25
  -3  -3  24   -0.09    1.10
   3   3 -23    0.00    1.61
  -3   3  23    1.51    1.49
  -3  -3  23    1.46    1.41
   3  -3 -23   -0.46    1.26
  -3   3  22   38.85    5.10
   3  -3 -22   31.29    4.87
  -3  -3  22   30.79    4.79
  -3  -3  22   29.82    5.14
  -3   3  21   28.93    4.92
  -3  -3  21   25.46    4.58
   3  -3 -21   29.43    4.90
  -3  -3  21   24.91    5.01
  -3   3  20    1.08    1.81
   3  -3 -20    0.91    1.90
  -3  -3  20    1.04    1.97
  -3  -3  20    0.95    1.79
  -3   3  19   89.97   12.41
   3  -3 -19   49.69    8.00
  -3  -3  19   77.16    7.82
  -3  -3  19   74.61    8.55
  -3   3  18  288.90   20.55
  -3   3  18  288.22   20.62
  -3  -3  18  262.95   21.03
  -3  -3  18  263.53   19.06
  -3   3  17    2.51    2.31
  -3   3  17    3.80    2.53
  -3  -3  17    3.01    2.22
  -3  -3  17    1.01    4.01
  -3   3  16   11.37    3.15
  -3   3  16    6.01    2.82
  -3  -3  16    5.81    2.74
  -3  -3  16    6.06    3.25
  -3   3  15  493.83   31.25
  -3   3  15  495.68   30.53
  -3  -3  15  404.07   26.95
  -3  -3  15  448.95   31.19
  -3   3  14   11.96    4.68
  -3   3  14   12.86    3.08
  -3  -3  14    9.94    5.14
  -3  -3  14   10.15    2.74
  -3   3  13  227.29   14.34
  -3   3  13  242.73   19.18
  -3  -3  13  203.21   12.97
  -3  -3  13  217.94   15.24
  -3   3  12  118.12    8.48
  -3   3  12  130.05    8.38
   3   3 -12  144.74    8.54
   3  -3 -12  131.36    9.99
   3  -3 -12  116.83    6.40
   3  -3 -12  114.49    7.92
   3  -3 -12  129.66    6.38
  -3  -3  12  122.91    8.22
  -3  -3  12  121.58    9.54
   3   3 -11    8.99    1.90
   3   3 -11    6.39    1.05
  -3   3  11    7.99    2.15
  -3   3  11   10.29    1.95
   3  -3 -11    7.63    1.87
   3  -3 -11    5.34    1.22
   3  -3 -11    6.90    1.23
  -3  -3  11    6.15    1.93
  -3  -3  11    7.70    2.28
   3  -3 -11    5.84    4.03
  -3  -3  11    5.78    1.86
  -3   3  10  636.44   34.33
  -3   3  10  630.52   35.39
   3   3 -10  611.08   33.27
   3   3 -10  603.35   29.34
   3  -3 -10  589.19   32.82
   3  -3 -10  604.18   30.55
   3  -3 -10  608.01   31.09
   3  -3 -10  656.57   39.42
  -3  -3  10  563.98   34.50
  -3  -3  10  573.98   32.29
  -3  -3  10  624.08   30.88
  -3   3   9  590.99   25.78
  -3   3   9  583.41   31.55
   3   3  -9  628.91   30.47
   3   3  -9  645.84   34.87
  -3   3   9  614.24   24.40
  -3   3   9  650.22   35.86
   3  -3  -9  608.89   31.17
   3  -3  -9  652.04   38.24
  -3  -3   9  600.81   32.85
  -3  -3   9  593.88   29.83
  -3  -3   9  606.68   35.57
   3  -3  -9  659.02   32.80
   3  -3  -9  651.73   38.52
  -3  -3   9  625.74   28.89
  -3   3   8   50.84    1.72
   3   3  -8   42.67    4.06
   3   3  -8   44.18    4.21
  -3   3   8   53.28    1.73
  -3   3   8   56.30    3.94
  -3   3   8   60.15    6.77
   3  -3  -8   55.11    5.01
  -3  -3   8   45.57    4.48
  -3  -3   8   40.17    2.85
   3  -3  -8   58.38    3.50
   3  -3  -8   54.15    3.56
  -3  -3   8   46.28    2.71
  -3  -3   8   47.16    4.01
   3  -3  -8   56.52    4.16
   3   3  -7  555.16   26.04
  -3   3   7  465.59   17.93
   3   3  -7  598.28   34.57
  -3   3   7  579.99   33.68
  -3   3   7  608.84   33.02
  -3   3   7  583.26   30.13
  -3   3   7  474.59   17.02
  -3  -3   7  523.09   25.15
   3  -3  -7  523.99   29.75
   3  -3  -7  575.12   32.62
  -3  -3   7  528.00   25.12
  -3  -3   7  568.59   31.94
   3  -3  -7  627.28   29.34
  -3  -3   7  537.68   28.71
  -3   3   6 1158.02   64.11
   3   3  -6 1069.83   62.09
   3   3  -6 1125.15   65.42
  -3   3   6 1120.42   64.83
   3   3  -6 1163.76   63.18
  -3   3   6 1079.67   64.01
   3  -3  -6 1100.53   62.98
  -3  -3   6 1020.51   56.46
  -3  -3   6 1081.41   63.19
  -3  -3   6 1137.21   63.54
   3  -3  -6 1108.89   61.68
   3  -3  -6 1105.19   71.18
  -3  -3   6 1140.60   63.65
   3   3  -5   65.31    4.16
  -3   3   5   82.99    4.95
   3   3  -5   63.23    4.17
   3   3  -5   70.86    3.83
   3   3  -5   70.65    5.63
  -3   3   5   76.15    4.09
  -3   3   5   83.89    4.50
   3  -3  -5   84.53    4.59
  -3  -3   5   67.99    4.11
   3  -3  -5   75.72    4.70
  -3  -3   5   69.00    5.82
   3  -3  -5   83.51    4.25
  -3  -3   5   64.74    5.17
   3   3  -4  668.80   36.20
   3   3  -4  699.39   35.71
  -3   3   4  685.51   34.40
   3   3  -4  722.92   38.75
   3   3  -4  707.03   34.63
  -3   3   4  717.97   35.00
  -3   3   4  742.92   25.91
  -3   3   4  726.47   38.59
   3  -3  -4  713.63   35.10
   3  -3  -4  668.05   36.58
   3  -3  -4  705.47   35.44
   3  -3  -4  676.18   34.90
   3  -3  -4  703.40   34.04
  -3  -3   4  673.58   33.06
  -3  -3   4  659.32   33.16
  -3  -3   4  677.23   35.60
   3   3  -3 1203.52   70.10
   3   3  -3 1316.67   73.98
   3   3  -3 1366.41   76.69
  -3   3   3 1301.44   76.24
  -3   3   3 1302.35   78.80
  -3   3   3 1386.94   77.15
   3   3  -3 1412.65   81.54
  -3   3   3 1397.33   65.87
   3  -3  -3 1337.14   76.88
   3  -3  -3 1394.48   78.38
   3  -3  -3 1402.00   83.84
   3  -3  -3 1247.79   71.02
  -3  -3   3 1317.95   78.80
  -3  -3   3 1198.83   68.07
   3  -3  -3 1277.59   73.78
  -3  -3   3 1313.78   73.92
  -3  -3   3 1234.46   59.53
  -3  -3   3 1197.72   57.61
   3   3  -2  569.59   27.42
   3   3  -2  553.99   26.29
  -3   3   2  581.29   26.56
  -3   3   2  557.36   26.58
   3   3  -2  597.70   27.57
  -3   3   2  614.42   23.43
  -3   3   2  559.72   29.91
   3   3  -2  597.81   29.81
   3  -3  -2  637.82   30.70
   3  -3  -2  565.09   27.10
  -3  -3   2  622.12   29.23
   3  -3  -2  642.94   32.97
   3  -3  -2  598.13   22.94
  -3  -3   2  596.91   26.34
   3  -3  -2  555.34   26.01
  -3  -3   2  617.65   31.75
  -3  -3   2  602.53   25.80
   3  -3  -2  588.69   30.89
  -3   3   1 1564.81   87.65
  -3   3   1 1636.98   98.35
   3   3  -1 1746.39  107.66
   3   3  -1 1579.24   93.32
   3   3  -1 1640.86   98.68
   3   3  -1 1540.74   91.55
  -3   3   1 1689.49   97.09
  -3   3   1 1535.11  104.52
  -3   3   1 1669.34   99.93
   3  -3  -1 1567.57  106.80
   3  -3  -1 1545.22   93.09
   3  -3  -1 1560.99   90.39
  -3  -3   1 1649.53  100.13
   3  -3  -1 1664.90   99.60
  -3  -3   1 1629.37  101.81
  -3  -3   1 1549.23   89.41
   3  -3  -1 1571.91   87.96
  -3  -3   1 1738.71  110.45
   3   3   0 1591.65   90.29
   3   3   0 1422.66   89.01
   3   3   0 1636.01   96.16
  -3   3   0 1521.16   84.12
   3   3   0 1516.12   87.59
  -3   3   0 1453.06   87.20
  -3   3   0 1558.53   97.66
  -3   3   0 1504.55   93.29
  -3   3   0 1620.76   88.70
   3  -3   0 1423.43   84.59
   3  -3   0 1559.09   91.62
   3  -3   0 1444.85   81.67
  -3  -3   0 1505.56   88.99
  -3  -3   0 1473.43   85.70
   3  -3   0 1660.80  103.33
  -3  -3   0 1578.13   97.51
  -3  -3   0 1435.79   92.41
   3  -3   0 1589.33   87.89
  -3   3  -1   39.06    2.85
  -3   3  -1   39.91    1.55
  -3   3  -1   48.42    3.07
   3   3   1   40.26    3.36
  -3   3  -1   43.58    3.02
   3   3   1   44.01    2.54
   3   3   1   42.74    2.01
   3   3   1   44.74    2.46
  -3   3  -1   47.21    3.69
  -3  -3  -1   45.85    2.77
   3  -3   1   45.07    2.33
   3  -3   1   45.62    3.44
   3  -3   1   40.55    2.66
   3  -3   1   42.40    1.45
  -3  -3  -1   44.48    2.92
  -3  -3  -1   40.43    3.79
   3  -3   1   41.43    2.63
  -3  -3  -1   41.99    3.78
  -3   3  -2   20.31    1.53
  -3   3  -2   21.40    2.55
   3   3   2   25.73    1.78
   3   3   2   23.29    1.95
  -3   3  -2   20.36    0.85
   3   3   2   25.03    2.81
  -3   3  -2   21.95    2.10
   3   3   2   25.05    2.97
  -3   3  -2   19.63    2.18
   3  -3   2   20.26    1.76
   3  -3   2   19.77    1.75
   3  -3   2   22.89    3.79
  -3  -3  -2   19.49    2.12
  -3  -3  -2   18.84    2.89
  -3  -3  -2   21.04    1.87
  -3  -3  -2   24.36    2.14
   3  -3   2   22.73    1.10
   3  -3   2   20.42    1.89
   3   3   3  170.41    7.17
   3   3   3  165.87    9.29
  -3   3  -3  139.74    7.15
  -3   3  -3  143.56    7.81
   3   3   3  137.70    5.01
  -3   3  -3  146.89   10.79
  -3   3  -3  148.30    6.36
   3   3   3  150.44    5.35
  -3   3  -3  147.41    4.65
  -3  -3  -3  148.87    7.57
  -3  -3  -3  156.87    9.43
   3  -3   3  147.01    6.34
   3  -3   3  142.87    7.30
   3  -3   3  151.22    7.22
   3  -3   3  136.86    6.06
  -3  -3  -3  164.06    7.05
  -3  -3  -3  144.90    7.60
   3   3   4  137.57    6.53
   3   3   4  125.33    5.52
  -3   3  -4  130.55    7.37
   3   3   4  116.91    4.41
  -3   3  -4  133.40    6.94
  -3   3  -4  124.13    3.21
   3   3   4  135.51    7.03
  -3   3  -4  129.89    6.06
   3  -3   4  131.78    5.62
  -3  -3  -4  144.12    6.30
   3  -3   4  142.05    6.82
  -3  -3  -4  130.86    7.62
   3  -3   4  126.27    6.86
   3  -3   4  130.00    5.65
  -3  -3  -4  127.05    6.71
   3  -3   4  120.86    6.76
  -3  -3  -4  147.97    7.25
  -3   3  -5  253.51   13.12
   3   3   5  260.59    9.79
   3   3   5  233.25    9.29
   3   3   5  278.95   12.72
   3   3   5  279.30   13.86
  -3   3  -5  269.39   12.53
  -3   3  -5  236.95   12.46
   3  -3   5  269.55   12.86
   3  -3   5  244.03   12.85
   3  -3   5  260.66   12.12
  -3  -3  -5  271.05   11.72
  -3  -3  -5  269.59   13.30
  -3  -3  -5  289.15   13.26
   3  -3   5  221.27    9.76
  -3  -3  -5  267.81   14.79
   3   3   6  652.30   32.99
   3   3   6  667.93   35.40
  -3   3  -6  571.84   31.34
   3   3   6  586.56   27.91
  -3   3  -6  625.25   33.15
   3   3   6  554.35   25.85
  -3   3  -6  648.94   32.79
   3  -3   6  638.44   29.44
   3  -3   6  587.00   32.20
   3  -3   6  565.33   26.62
  -3  -3  -6  594.96   34.58
  -3  -3  -6  572.68   30.68
  -3  -3  -6  670.11   31.97
   3  -3   6  589.65   29.26
  -3  -3  -6  637.78   32.55
   3  -3   6  692.91   42.46
  -3   3  -7   73.66    4.79
   3   3   7   87.76    5.16
   3   3   7   64.56    3.30
  -3   3  -7   75.03    5.43
   3   3   7   71.50    3.08
  -3   3  -7   68.27    6.43
   3   3   7   77.89    5.49
   3  -3   7   61.59    5.15
   3  -3   7   68.74    3.73
  -3  -3  -7   71.72    6.07
   3  -3   7   75.94    8.57
   3  -3   7   69.13    4.04
   3  -3   7   60.65    2.90
  -3  -3  -7   73.89    4.86
  -3  -3  -7   71.15    4.30
  -3  -3  -7   77.20    3.70
  -3   3  -8  230.56   12.98
  -3   3  -8  251.23   12.22
   3   3   8  193.91   11.10
   3   3   8  216.68   11.70
   3   3   8  214.35   12.27
  -3   3  -8  208.18   10.93
   3  -3   8  213.38    9.70
  -3  -3  -8  210.87    9.32
  -3  -3  -8  179.68   10.68
  -3  -3  -8  221.16   10.62
   3  -3   8  201.60   11.85
  -3  -3  -8  201.12   17.36
   3  -3   8  214.04   13.17
   3   3   9   32.22    2.67
   3   3   9   38.23    4.06
  -3   3  -9   36.10    4.09
   3   3   9   30.49    2.06
  -3   3  -9   45.55    3.59
   3   3   9   37.92    3.76
  -3   3  -9   34.15    3.09
  -3  -3  -9   37.47    5.32
   3  -3   9   36.46    3.90
   3  -3   9   35.09    3.55
   3  -3   9   34.64    4.36
  -3  -3  -9   41.73    2.98
  -3  -3  -9   35.65    4.65
   3   3  10   44.48    2.64
   3   3  10   38.75    3.56
   3   3  10   53.46    5.20
   3   3  10   55.51    4.84
  -3   3 -10   52.87    4.97
  -3   3 -10   58.51    4.25
  -3  -3 -10   43.42    5.81
   3  -3  10   42.76    4.65
  -3  -3 -10   44.04    3.46
   3  -3  10   45.74    5.31
  -3  -3 -10   37.98    6.18
   3   3  11   18.49    3.34
   3   3  11   18.17    3.16
   3  -3  11   14.35    3.48
   3  -3  11   15.73    3.12
  -3  -3 -11   14.74    3.57
   3   3  12   28.88    7.05
   3   3  12   32.37    4.60
   3  -3  12   29.97    4.48
   3  -3  12   32.99    5.21
   3   3  13    4.39    2.45
   3   3  13    3.58    2.44
   3  -3  13    4.85    2.70
   3  -3  13    3.29    2.31
   3   3  14   -0.60    1.85
   3  -3  14    1.53    1.99
   3  -3  14    2.31    1.78
  -3  -3 -14    0.16    1.93
   3   3  15   17.89    6.51
   3  -3  15   16.52    4.88
   3  -3  15   18.72    6.52
  -3  -3 -15   18.72    4.57
   3   3  16   81.49    8.70
   3  -3  16   79.18    9.65
   3  -3  16   85.06    8.79
  -3  -3 -16   74.48    8.92
   3   3  17    4.59    2.76
   3  -3  17    3.43    3.16
   3  -3  17    4.90    2.80
  -3  -3 -17    7.83    4.46
   3   3  18  385.26   25.59
   3  -3  18  363.27   32.30
   3  -3  18  303.00   25.89
  -3  -3 -18  367.97   27.14
   3   3  19   75.28    7.56
   3  -3  19   54.36    7.89
   3  -3  19   71.42    7.54
  -3  -3 -19   59.89    7.27
   3   3  20    4.97    3.76
  -3   3 -20    7.00    2.66
   3  -3  20    6.73    2.51
  -3  -3 -20    0.20    2.09
   3   3  21    7.66    3.07
  -3   3 -21   -0.07    2.12
  -3  -3 -21    0.68    1.52
   3  -3  21    7.76    3.09
  -3   3 -22    0.02    1.25
   3   3  22    5.13    1.94
   3  -3  22   -0.25    1.70
  -3  -3 -22   -0.39    0.82
   3   5 -23   -0.00    2.22
  -3   5  23    9.87    3.85
   3  -5 -23   13.10    2.34
  -3  -5  23    9.52    2.10
   3   5 -22    0.00    1.86
  -3   5  22    3.77    3.17
   3  -5 -22    4.25    2.06
  -3  -5  22    6.27    1.85
   3   5 -21    0.00    1.88
  -3   5  21    3.00    3.07
   3  -5 -21    4.40    2.12
  -3  -5  21    1.32    2.86
  -3   5  20   -0.54    2.72
   3   5 -20    1.63    1.52
   3  -5 -20    0.31    1.78
  -3  -5  20    0.14    1.54
   3   5 -19    0.44    1.13
  -3   5  19    2.92    1.91
   3  -5 -19   -1.06    1.31
  -3  -5  19   -0.66    1.13
   3   5 -18   10.57    5.18
  -3   5  18   12.84    3.71
   3  -5 -18    0.44    3.84
  -3  -5  18   12.20    3.47
   3   5 -17    8.28    3.55
  -3   5  17   13.75    3.76
  -3   5  17   14.58    3.95
  -3  -5  17   10.29    3.75
   3   5 -16   30.99    5.62
  -3   5  16   38.58    5.96
  -3   5  16   37.12    6.21
  -3  -5  16   39.65    6.00
   3   5 -15    2.26    2.42
  -3   5  15    5.00    2.57
  -3   5  15    3.85    2.55
  -3  -5  15    2.37    2.64
   3   5 -14    9.73    3.50
  -3   5  14   14.44    3.59
  -3   5  14   13.76    3.59
  -3  -5  14   12.16    3.76
   3   5 -13   84.07    8.37
  -3   5  13   87.39    8.21
  -3   5  13   90.56    8.35
  -3  -5  13   87.07    8.59
   3   5 -12   34.97    5.17
  -3   5  12   41.61    5.17
  -3   5  12   39.35    7.60
   3  -5 -12   41.44    4.09
   3  -5 -12   33.77    4.04
  -3  -5  12   38.92    5.31
   3   5 -11   44.50    8.07
  -3   5  11   50.99    5.17
  -3   5  11   54.49    5.48
   3  -5 -11   50.57    4.35
  -3  -5  11   36.08    3.77
  -3  -5  11   47.28    5.52
  -3  -5  11   44.47    4.09
   3  -5 -11   52.71    4.49
   3   5 -10   30.19    4.19
  -3   5  10   35.15    3.91
  -3   5  10   39.28    4.22
   3  -5 -10   32.49    3.55
  -3  -5  10   36.19    4.25
  -3  -5  10   25.66    3.03
  -3  -5  10   27.31    3.12
   3  -5 -10   32.55    3.39
   3   5  -9  527.26   32.21
   3   5  -9  495.62   29.06
   3   5  -9  556.26   31.34
  -3   5   9  523.51   30.33
  -3   5   9  526.25   31.40
   3  -5  -9  578.43   36.66
   3  -5  -9  572.27   32.83
  -3  -5   9  468.91   27.37
  -3  -5   9  540.37   30.72
  -3  -5   9  578.59   38.52
  -3  -5   9  539.46   34.20
  -3   5   8    3.28    1.31
   3   5  -8    0.26    1.28
   3   5  -8    0.30    1.84
  -3   5   8    3.93    2.00
   3   5  -8    0.02    1.12
   3  -5  -8    2.20    1.33
   3  -5  -8    2.51    1.16
   3  -5  -8    1.01    2.17
   3  -5  -8    2.18    1.38
  -3  -5   8   -0.82    1.08
  -3  -5   8   -0.02    1.09
  -3  -5   8    1.63    1.25
  -3  -5   8   -0.55    1.09
   3   5  -7  474.67   27.30
  -3   5   7  525.11   31.70
  -3   5   7  515.33   28.59
   3   5  -7  510.29   28.18
  -3   5   7  538.03   29.34
   3   5  -7  467.99   27.59
   3  -5  -7  480.41   28.69
   3  -5  -7  489.34   28.09
  -3  -5   7  447.26   26.83
  -3  -5   7  494.48   27.49
  -3  -5   7  454.69   25.77
  -3  -5   7  566.73   31.01
   3  -5  -7  445.49   27.62
   3   5  -6   28.44    2.82
  -3   5   6   26.13    3.18
   3   5  -6   26.77    3.24
  -3   5   6   29.98    3.01
   3   5  -6   28.38    4.75
  -3   5   6   27.59    3.94
   3  -5  -6   23.43    3.46
   3  -5  -6   26.77    3.20
   3  -5  -6   22.28    3.19
  -3  -5   6   25.58    2.79
  -3  -5   6   22.12    2.88
  -3  -5   6   23.92    3.36
  -3  -5   6   23.82    3.03
  -3   5   5    4.12    1.40
   3   5  -5    2.20    2.35
   3   5  -5    1.82    1.17
  -3   5   5    1.93    1.82
   3   5  -5    4.28    2.22
  -3   5   5    2.42    1.21
   3  -5  -5    1.87    2.09
   3  -5  -5    2.18    1.59
  -3  -5   5    2.42    1.38
  -3  -5   5    2.53    1.43
   3  -5  -5    3.17    1.47
  -3  -5   5    1.25    1.59
  -3  -5   5    1.62    1.76
   3   5  -4  644.06   38.37
  -3   5   4  675.98   37.34
   3   5  -4  629.19   35.94
  -3   5   4  641.41   39.85
   3   5  -4  638.23   34.72
   3  -5  -4  611.13   45.90
   3  -5  -4  632.88   36.99
   3  -5  -4  601.75   38.50
  -3  -5   4  685.50   41.62
   3  -5  -4  649.97   38.45
  -3  -5   4  711.50   40.01
  -3  -5   4  653.90   36.64
   3  -5  -4  639.07   36.29
  -3  -5   4  658.99   37.45
   3   5  -3   38.88    3.46
  -3   5   3   29.80    6.70
  -3   5   3   31.95    3.32
   3   5  -3   36.43    2.77
   3   5  -3   34.94    4.11
  -3   5   3   33.16    3.58
  -3   5   3   33.69    4.01
   3  -5  -3   28.32    3.38
   3  -5  -3   29.81    3.66
  -3  -5   3   37.43    3.62
  -3  -5   3   33.66    4.36
   3  -5  -3   32.95    4.85
   3  -5  -3   29.60    2.76
  -3  -5   3   36.27    3.69
  -3  -5   3   35.82    5.40
   3   5  -2  165.98   10.85
  -3   5   2  155.87   11.05
   3   5  -2  163.58    8.08
   3   5  -2  155.46    8.80
  -3   5   2  153.69    9.59
  -3   5   2  165.05    9.23
   3  -5  -2  158.22    9.63
   3  -5  -2  172.84   12.28
   3  -5  -2  156.52    7.80
  -3  -5   2  169.68   15.34
  -3  -5   2  169.00    9.52
  -3  -5   2  151.66    6.78
   3  -5  -2  157.79    9.05
  -3  -5   2  169.65   10.13
   3   5  -1  219.75   11.09
   3   5  -1  190.09    9.23
  -3   5   1  204.85   11.55
  -3   5   1  195.35   17.32
   3   5  -1  188.57   16.87
   3  -5  -1  189.97   10.66
   3  -5  -1  188.09   11.24
  -3  -5   1  201.22    9.70
  -3  -5   1  194.95   13.62
  -3  -5   1  190.61   11.26
   3  -5  -1  207.19   13.55
  -3  -5   1  184.76    8.38
  -3  -5   1  212.72   11.64
   3  -5  -1  193.74    8.55
   3   5   0  292.30   17.83
   3   5   0  292.40   15.10
  -3   5   0  295.62   18.47
  -3   5   0  289.65   15.80
  -3   5   0  310.76   12.43
   3   5   0  254.67   12.48
   3  -5   0  292.37   11.86
   3  -5   0  280.44   15.07
   3  -5   0  281.12   17.97
  -3  -5   0  290.14   23.89
  -3  -5   0  282.08   13.78
  -3  -5   0  296.40   16.34
  -3  -5   0  279.11   15.66
  -3   5  -1   22.04    3.04
   3   5   1   20.00    2.70
   3   5   1   26.69    2.00
   3   5   1   22.83    1.56
   3   5   1   23.95    3.77
  -3   5  -1   24.03    1.75
  -3   5  -1   21.09    3.05
   3   5   1   25.06    2.76
  -3   5  -1   23.91    3.78
   3  -5   1   22.00    2.76
   3  -5   1   19.53    2.59
  -3  -5  -1   20.80    2.35
  -3  -5  -1   23.06    3.08
   3  -5   1   22.69    3.59
  -3  -5  -1   23.61    4.03
  -3  -5  -1   21.98    3.12
   3  -5   1   24.47    2.88
   3   5   2  221.92   14.85
  -3   5  -2  225.01   12.95
   3   5   2  236.55   13.23
  -3   5  -2  237.60   13.13
  -3   5  -2  213.77    9.97
  -3   5  -2  221.17   14.51
  -3  -5  -2  215.51   15.35
   3  -5   2  219.22   12.38
   3  -5   2  231.89   12.18
   3  -5   2  235.37   14.10
  -3  -5  -2  202.37   11.78
  -3  -5  -2  212.36   12.79
   3  -5   2  222.19   10.68
  -3  -5  -2  230.12   13.87
  -3  -5  -2  227.69   12.75
  -3   5  -3 1331.03   87.68
  -3   5  -3 1323.71   85.46
   3   5   3 1355.78   89.77
   3   5   3 1391.71   84.66
  -3   5  -3 1438.23   88.07
  -3   5  -3 1346.60   99.69
   3  -5   3 1217.16   79.91
  -3  -5  -3 1251.88   83.76
  -3  -5  -3 1388.18   91.84
   3  -5   3 1343.59   84.48
  -3  -5  -3 1272.72   85.27
   3  -5   3 1322.60   88.69
  -3  -5  -3 1385.53   88.71
  -3  -5  -3 1335.40   94.03
   3  -5   3 1254.34   79.66
   3   5   4   16.33    2.47
  -3   5  -4   15.87    1.88
   3   5   4   17.33    2.29
  -3   5  -4   14.66    3.26
  -3   5  -4   20.29    3.02
  -3   5  -4   14.39    2.80
   3  -5   4   16.98    2.30
  -3  -5  -4   17.91    2.75
   3  -5   4   19.23    3.46
   3  -5   4   15.32    2.23
  -3  -5  -4   17.10    2.96
  -3  -5  -4   15.92    2.77
   3  -5   4   14.81    2.71
  -3  -5  -4   19.36    2.56
  -3   5  -5   38.03    4.63
  -3   5  -5   44.32    3.34
   3   5   5   39.19    3.63
  -3   5  -5   38.93    4.36
   3   5   5   43.79    3.84
  -3   5  -5   37.41    4.08
  -3  -5  -5   41.04    3.70
   3  -5   5   33.10    3.20
   3  -5   5   41.97    4.01
  -3  -5  -5   37.87    6.20
   3  -5   5   38.56    3.29
   3  -5   5   42.43    3.73
  -3  -5  -5   37.32    4.16
  -3  -5  -5   36.78    4.41
  -3   5  -6   75.92    9.24
   3   5   6   89.08    8.41
   3   5   6   74.72    5.71
  -3   5  -6   89.91    7.53
  -3   5  -6   85.77    6.93
   3  -5   6   75.84    5.77
   3  -5   6   70.84    4.98
   3  -5   6   75.79    5.02
  -3  -5  -6   82.47    6.54
  -3  -5  -6   77.90    7.06
  -3  -5  -6   77.02    6.11
   3  -5   6   83.01    6.18
  -3  -5  -6   89.68    5.91
  -3   5  -7  117.91    8.57
   3   5   7  129.62    8.41
  -3   5  -7  110.04    8.95
   3   5   7  131.22   10.84
  -3   5  -7  125.46    7.47
   3  -5   7  110.04    6.55
   3  -5   7  123.08    9.82
  -3  -5  -7  136.01    8.51
  -3  -5  -7  117.39    9.81
   3  -5   7  109.64   11.52
   3  -5   7  105.04    6.57
   3   5   8   25.38    3.50
  -3   5  -8   18.35    5.82
   3   5   8   25.67    4.96
  -3   5  -8   21.69    3.40
   3  -5   8   19.31    3.50
  -3  -5  -8   20.69    3.09
   3  -5   8   21.29    2.72
  -3  -5  -8   19.96    2.54
   3   5   9  510.91   29.94
   3   5   9  526.08   31.10
  -3   5  -9  433.87   29.67
   3  -5   9  469.90   30.62
  -3  -5  -9  371.53   29.49
  -3  -5  -9  483.99   28.15
   3   5  10   10.53    2.85
   3   5  10   10.84    4.75
  -3   5 -10    8.56    3.16
   3  -5  10    9.10    2.97
  -3  -5 -10    9.13    2.36
   3   5  11  144.27   11.58
   3   5  11  140.93   10.99
  -3   5 -11  118.62   11.69
  -3  -5 -11  140.57    9.61
   3  -5  11  123.04   15.55
   3   5  12    0.81    1.68
  -3   5 -12   -0.33    1.80
   3   5  12   -0.01    1.71
   3  -5  12    0.63    1.71
  -3  -5 -12    1.45    1.37
   3   5  13   30.10    5.45
  -3   5 -13   24.62    5.61
  -3  -5 -13   30.62    5.92
   3  -5  13   33.61    5.35
   3   5  14   15.08    4.19
  -3   5 -14   15.91    4.36
  -3  -5 -14   15.59    4.66
   3  -5  14   14.48    4.16
   3   5  15   29.72    8.00
  -3   5 -15   27.72    5.20
   3  -5  15   14.22    7.85
  -3  -5 -15   29.19    5.49
   3   5  16  130.30   11.18
  -3   5 -16  112.18   15.50
  -3  -5 -16  112.99   11.58
   3  -5  16   95.62   10.56
   3   5  17    1.64    2.23
  -3   5 -17    1.62    2.34
  -3  -5 -17    2.59    2.51
   3  -5  17    4.54    2.33
   3   5  18   59.04    6.29
  -3   5 -18   55.16    6.72
   3  -5  18   46.18    6.52
  -3  -5 -18   48.16    6.56
   3   5  19   48.88    5.47
  -3   5 -19   46.02    5.89
   3  -5  19   43.80    8.16
  -3  -5 -19   42.73    5.75
   3   5  20   22.52    3.49
  -3   5 -20   19.23    3.60
   3  -5  20   17.65    3.37
  -3  -5 -20   21.41    3.55
   3   7 -20   20.12    2.89
  -3   7  20   26.18    3.47
   3  -7 -20   24.30    3.61
  -3  -7  20   19.99    2.67
   3   7 -19    5.30    1.92
  -3   7  19    4.23    2.31
   3  -7 -19    8.67    2.47
  -3  -7  19    4.52    1.73
   3   7 -18   20.21    3.74
  -3   7  18   30.40    4.60
   3  -7 -18   25.84    7.03
  -3  -7  18   25.05    5.03
   3   7 -17   65.12    9.85
  -3   7  17   75.53    7.82
   3  -7 -17   64.75    7.92
  -3  -7  17   63.67    5.91
  -3   7  16    0.78    1.68
   3   7 -16   -0.80    1.42
   3  -7 -16    0.65    1.66
  -3  -7  16    0.97    1.21
   3   7 -15  120.39   10.80
  -3   7  15  146.60   11.70
   3  -7 -15  132.84   12.30
  -3  -7  15  121.63    9.66
   3   7 -14   18.57    4.03
  -3   7  14   19.78    3.98
  -3   7  14   23.45    4.38
  -3  -7  14   17.54    3.38
   3   7 -13   10.18    3.21
  -3   7  13   12.59    3.18
  -3   7  13   12.12    5.45
   3  -7 -13    9.08    2.83
  -3  -7  13   11.73    2.62
  -3   7  12   14.21    3.44
   3   7 -12   10.50    3.29
  -3   7  12   13.23    3.07
  -3  -7  12    9.23    2.58
   3  -7 -12    8.77    4.25
   3  -7 -12   11.14    2.83
   3   7 -11    5.08    4.63
  -3   7  11    7.26    3.00
  -3   7  11    9.47    2.64
   3  -7 -11   10.54    2.59
  -3  -7  11    7.13    2.27
   3  -7 -11    6.47    2.39
   3   7 -10    1.99    1.91
  -3   7  10    1.05    1.85
  -3   7  10    1.63    1.69
   3  -7 -10    2.80    1.68
  -3  -7  10    1.13    1.67
   3  -7 -10    1.71    1.85
  -3  -7  10    2.32    1.46
   3   7  -9  154.42   12.06
  -3   7   9  156.88   12.06
  -3   7   9  163.30   11.04
   3  -7  -9  161.57   12.18
  -3  -7   9  157.46   13.88
  -3  -7   9  136.03   11.40
   3  -7  -9  159.15   12.26
   3   7  -8   54.19    6.09
  -3   7   8   61.43    9.11
  -3   7   8   56.62    5.36
   3  -7  -8   49.36    5.94
  -3  -7   8   45.33    5.36
   3  -7  -8   50.04    9.37
  -3  -7   8   53.57    5.96
  -3  -7   8   50.24    4.88
  -3   7   7   16.50    3.71
   3   7  -7   17.83    3.28
  -3   7   7   14.23    4.52
   3  -7  -7   19.63    3.65
  -3  -7   7   12.58    3.40
   3  -7  -7   16.16    4.04
  -3  -7   7   14.82    3.51
  -3   7   6   93.81    8.11
   3   7  -6   83.83    7.44
   3  -7  -6   80.98    9.10
  -3  -7   6   77.84    7.70
  -3  -7   6   79.35    8.09
   3  -7  -6   88.76    8.10
  -3   7   5   37.98    4.87
   3   7  -5   27.37    4.37
   3  -7  -5   36.38    5.08
  -3  -7   5   38.33    4.84
  -3  -7   5   36.38    5.06
   3  -7  -5   31.52    5.77
   3   7  -4  215.50   19.15
  -3   7   4  222.57   15.47
  -3   7   4  241.26   19.29
  -3  -7   4  222.63   16.03
  -3  -7   4  206.31   14.94
   3  -7  -4  218.42   16.10
   3   7  -3  243.29   16.00
  -3   7   3  266.43   21.13
  -3  -7   3  254.53   18.06
   3  -7  -3  263.98   18.68
  -3  -7   3  245.87   17.30
   3   7  -2   46.00    4.83
  -3   7   2   33.25   10.03
   3  -7  -2   32.06    8.38
  -3  -7   2   38.47    5.68
  -3  -7   2   31.61    5.25
  -3   7   1   36.90    4.75
  -3   7   1   37.59    6.37
  -3  -7   1   37.03    7.94
  -3  -7   1   32.44    5.65
  -3   7   0   36.78    6.27
   3  -7   0   36.16    4.87
  -3  -7   0   37.64    5.81
   3   7   1  108.87    8.17
  -3   7  -1   99.48   10.28
   3  -7   1  104.25   12.55
  -3  -7  -1  106.05    9.13
  -3  -7  -1   99.46   10.06
   3   7   2    6.61    2.21
  -3   7  -2    6.47    3.02
  -3   7  -2    6.52    2.43
   3  -7   2    4.44    2.34
  -3  -7  -2    5.48    2.95
  -3  -7  -2    4.43    2.49
   3   7   3  439.59   26.47
  -3   7  -3  381.07   25.43
  -3   7  -3  381.44   27.55
  -3  -7  -3  410.85   27.38
  -3  -7  -3  424.56   28.32
   3  -7   3  348.92   29.42
  -3   7  -4  203.43   15.33
   3   7   4  220.07   18.75
  -3   7  -4  208.59   16.56
  -3  -7  -4  235.32   15.97
  -3  -7  -4  234.40   16.56
   3  -7   4  178.39   13.59
   3   7   5   60.64    6.12
  -3   7  -5   61.41    7.11
  -3   7  -5   67.39    6.98
  -3  -7  -5   53.92    6.12
  -3  -7  -5   60.38    7.05
   3  -7   5   50.69    5.83
   3   7   6  352.96   21.40
  -3   7  -6  312.91   22.29
  -3   7  -6  325.99   22.78
  -3  -7  -6  335.50   23.00
  -3  -7  -6  314.81   22.27
  -3  -7  -6  293.02   21.91
   3  -7   6  309.82   21.20
   3   7   7  290.96   18.23
  -3   7  -7  283.13   20.01
  -3   7  -7  268.39   19.39
   3  -7   7  204.94   20.62
  -3  -7  -7  294.68   19.15
  -3  -7  -7  297.39   19.67
  -3  -7  -7  216.50   18.18
   3   7   8    0.83    1.71
  -3   7  -8    0.79    2.00
  -3  -7  -8    0.67    1.74
  -3  -7  -8    2.86    1.85
  -3  -7  -8    1.63    1.50
   3   7   9    5.36    2.41
  -3   7  -9    6.09    2.71
   3  -7   9    3.96    2.23
  -3  -7  -9    5.28    4.20
  -3  -7  -9    5.01    2.34
  -3  -7  -9    3.30    3.26
   3   7  10  107.78   12.66
  -3   7 -10   93.89    9.51
   3  -7  10  103.16    8.77
  -3  -7 -10   96.15    9.70
  -3  -7 -10   95.99    8.46
  -3   7 -11   20.04    4.31
   3   7  11   22.16    4.08
   3  -7  11   17.45    3.62
  -3  -7 -11   17.85    3.56
  -3  -7 -11   22.80    4.42
   3   7  12   65.36    6.94
  -3   7 -12   49.12    6.69
   3  -7  12   46.77    5.69
  -3  -7 -12   50.64    6.11
  -3  -7 -12   53.82    7.09
  -3   7 -13   -0.83    1.68
   3   7  13   -0.46    1.70
   3  -7  13    1.39    1.32
  -3  -7 -13    2.14    1.73
  -3   7 -14    1.91    2.07
   3   7  14    2.86    2.13
   3  -7  14    2.86    1.63
  -3  -7 -14    1.07    2.20
   3   7  15   -0.89    1.37
  -3   7 -15    1.56    1.35
   3  -7  15   -0.51    1.06
  -3  -7 -15   -1.00    1.36
   3   7  16    1.55    1.52
  -3   7 -16   -0.19    2.44
   3  -7  16    1.24    1.16
  -3  -7 -16    0.23    1.52
   3   7  17   37.70    4.08
  -3   7 -17   35.43    4.25
  -3  -7 -17   32.75    4.22
   3  -7  17   28.43    3.44
   3   9 -15   29.83    2.93
   3   9 -14    0.05    1.17
  -3   9  14    3.18    1.62
  -3   9  13   23.82    3.67
   3   9 -13   13.53    2.68
   3  -9 -13   19.34    2.73
   3   9 -12   -0.02    1.69
  -3   9  12    4.97    2.10
   3  -9 -12    2.21    1.49
   3  -9 -12    7.20    1.73
   3   9 -11   44.63    4.91
  -3   9  11   54.15    8.74
   3  -9 -11   49.71    4.97
   3  -9 -11   40.42    7.34
   3   9 -10    7.43    2.19
  -3   9  10    6.75    2.56
   3  -9 -10    6.23    2.14
   3  -9 -10    7.92    2.37
  -3  -9  10    1.97    2.12
  -3   9   9   55.31    5.69
   3   9  -9   44.08    5.05
   3  -9  -9   54.28    8.38
  -3  -9   9   33.38    5.14
   3  -9  -9   50.39    5.65
   3   9  -8    0.42    1.64
  -3   9   8    3.09    1.78
   3  -9  -8    3.18    1.93
   3  -9  -8    1.13    1.82
  -3  -9   8    1.20    1.68
   3   9  -7   41.94    7.27
  -3   9   7   45.02    7.76
   3  -9  -7   39.11    5.55
   3  -9  -7   43.72    5.87
  -3  -9   7   35.89    7.86
  -3  -9   7   37.32    5.09
   3   9  -6    2.65    1.89
  -3   9   6    3.10    2.06
   3  -9  -6    0.94    2.12
   3  -9  -6    4.38    2.31
  -3  -9   6    1.61    2.00
  -3  -9   6    3.63    1.99
   3   9  -5   65.69    6.61
  -3   9   5   70.01    7.29
   3  -9  -5   70.29    7.87
  -3  -9   5   67.99    7.11
   3  -9  -5   64.14    7.61
  -3  -9   5   58.19    7.15
  -3   9   4   -4.75    3.17
   3  -9  -4    1.44    2.14
   3  -9  -4   -1.03    2.03
  -3  -9   4   -0.09    1.92
  -3  -9   4    1.46    1.89
   3   9  -3   75.45    7.34
  -3   9   3   87.81    8.30
   3  -9  -3   83.13    9.11
  -3  -9   3   81.55    8.17
   3  -9  -3   74.64    8.43
  -3  -9   3   83.39   13.18
   3  -9  -2  257.57   25.85
   3  -9  -2  212.31   17.49
  -3  -9   2  241.19   17.69
   3  -9  -1   46.10    6.67
  -3  -9   1   42.24    6.18
  -3  -9   1   37.62    6.26
   3   9   0    2.98    1.94
   3  -9   0    0.50    2.45
  -3  -9   0    1.89    2.27
  -3  -9   0    4.69    2.39
   3   9   1    3.79    3.95
   3  -9   1    8.22    3.10
   3  -9   1    8.33    2.80
  -3  -9  -1    6.04    3.10
  -3  -9  -1    3.42    2.90
   3   9   2   17.57    3.65
  -3   9  -2   21.45    4.07
   3  -9   2   15.98    4.44
  -3  -9  -2   22.95    4.65
   3  -9   2   20.55    4.16
  -3  -9  -2   21.51    4.42
  -3   9  -3   83.08    8.15
   3   9   3   91.11    7.70
   3  -9   3   81.33    8.41
  -3  -9  -3   95.71    9.05
   3  -9   3   86.96    8.87
  -3  -9  -3   86.30    8.94
   3   9   4   40.03    6.92
  -3   9  -4   38.54    5.00
   3  -9   4   36.45    5.32
   3  -9   4   25.34    4.90
  -3  -9  -4   39.80    5.54
  -3  -9  -4   38.39    5.63
   3   9   5   10.45    2.74
  -3   9  -5   13.90    3.12
   3  -9   5   11.01    3.15
   3  -9   5    6.98    4.44
  -3  -9  -5   12.82    3.34
  -3  -9  -5    8.89    3.12
  -3   9  -6    1.39    1.66
   3   9   6    0.30    1.54
   3  -9   6    0.05    1.42
  -3  -9  -6    2.01    1.61
  -3  -9  -6    4.16    1.75
   3  -9   6    0.10    1.57
   3   9   7  125.15    9.49
  -3   9  -7  118.49   13.46
  -3  -9  -7  132.03   10.11
  -3  -9  -7   96.90   12.20
  -3   9  -8   23.32    3.76
  -3  -9  -8   17.32    3.32
  -3  -9  -8   29.62    6.03
   3   9   9    1.43    1.50
  -3   9  -9    1.48    1.44
  -3  -9  -9    1.44    1.43
  -3  -9  -9    0.08    1.14
   3   9  10   46.11    4.97
  -3   9 -10   34.91    4.53
  -3  -9 -10   39.42    4.62
   3   9  11    2.19    1.68
  -3   9 -11    1.20    1.57
  -3  -9 -11    2.93    1.51
   3   9  12   -0.10    1.14
  -3   9 -12    0.80    1.58
  -4   0  26    0.93    1.30
  -4   0  25    0.17    1.17
  -4   0  24  245.80   16.36
  -4   0  23    1.68    1.95
  -4   0  22    7.89    2.71
  -4   0  22    2.60    2.39
  -4   0  21    1.21    1.31
  -4   0  21   -1.08    1.39
  -4   0  20  114.09    9.64
  -4   0  20   93.36    9.78
  -4   0  19   -0.25    1.37
  -4   0  19   -0.20    1.39
  -4   0  18    5.04    2.37
  -4   0  18    3.73    2.48
  -4   0  17   -1.80    1.53
  -4   0  17   -0.59    1.16
  -4   0  17   -0.65    1.54
  -4   0  16  830.63   53.85
  -4   0  16  915.32   54.33
  -4   0  16  869.25   58.56
   4   0 -15    0.53    0.72
  -4   0  15   -0.06    1.67
  -4   0  15    0.23    1.28
  -4   0  15   -0.35    1.07
   4   0 -14  126.39   10.01
   4   0 -14  113.63   10.29
   4   0 -14  132.98    6.85
  -4   0  14  140.21    8.73
  -4   0  14  137.33    7.29
  -4   0  14  134.12    8.94
   4   0 -13    1.54    1.04
   4   0 -13    1.81    1.12
   4   0 -13    1.31    0.87
  -4   0  13    1.79    0.96
  -4   0  13    0.14    1.95
  -4   0  13    1.28    1.24
   4   0 -12 2057.56  144.68
   4   0 -12 1889.52  133.40
   4   0 -12 2154.05  144.23
   4   0 -12 2150.99  131.60
  -4   0  12 2176.47  147.20
  -4   0  12 1993.90  142.30
  -4   0  12 2188.25  134.55
  -4   0  12 2127.33  152.41
   4   0 -11    0.76    0.84
   4   0 -11    0.92    0.36
   4   0 -11   -0.03    1.12
  -4   0  11    0.02    1.53
  -4   0  11   -0.89    1.47
  -4   0  11   -0.28    0.75
  -4   0  11    0.32    0.37
   4   0 -10  799.86   43.76
   4   0 -10  906.67   42.04
   4   0 -10  907.60   45.72
  -4   0  10  913.85   50.44
  -4   0  10  944.99   44.88
  -4   0  10  924.73   47.99
  -4   0  10  829.99   46.69
   4   0  -9    1.91    0.46
   4   0  -9    1.48    1.31
   4   0  -9    1.51    0.66
   4   0  -9    1.22    0.78
  -4   0   9    1.76    0.79
  -4   0   9    2.42    0.45
  -4   0   9    2.18    1.53
  -4   0   9    1.02    0.91
   4   0  -8  204.10    8.60
   4   0  -8  223.10    7.66
   4   0  -8  224.38    8.51
   4   0  -8  215.43    9.09
  -4   0   8  214.50    9.71
  -4   0   8  222.40    9.83
  -4   0   8  233.52    7.80
  -4   0   8  225.05    9.32
   4   0  -7    5.39    1.08
   4   0  -7    7.44    1.07
   4   0  -7    7.81    1.00
   4   0  -7    6.11    0.76
  -4   0   7    5.81    1.18
  -4   0   7    6.99    0.75
  -4   0   7    7.20    2.09
  -4   0   7    5.59    1.22
   4   0  -6 1452.93   78.60
   4   0  -6 1279.57   67.26
   4   0  -6 1321.02   73.31
   4   0  -6 1345.80   72.52
  -4   0   6 1286.90   78.08
  -4   0   6 1367.33   76.10
  -4   0   6 1407.39   72.46
  -4   0   6 1188.71   67.69
   4   0  -5    0.61    0.69
   4   0  -5    0.59    0.65
   4   0  -5    0.25    0.56
   4   0  -5    0.64    0.92
  -4   0   5    2.06    0.54
  -4   0   5    0.75    1.06
  -4   0   5   -0.44    1.19
  -4   0   5    0.83    0.69
   4   0  -4 1321.18   69.83
   4   0  -4 1525.18   77.43
   4   0  -4 1377.99   65.27
   4   0  -4 1735.43   90.84
   4   0  -4 1670.84   87.01
  -4   0   4 1516.33   78.84
  -4   0   4 1784.09   94.75
  -4   0   4 1713.09   90.23
  -4   0   4 1423.64   73.75
   4   0  -3    2.42    0.23
   4   0  -3    2.03    0.22
   4   0  -3    2.87    0.37
   4   0  -3    2.49    0.39
   4   0  -3    2.71    0.41
  -4   0   3    2.05    0.32
  -4   0   3    2.27    0.21
  -4   0   3    2.57    0.61
  -4   0   3    2.35    0.21
  -4   0   3    2.38    0.42
   4   0  -2  281.01    8.83
   4   0  -2  273.38    8.43
   4   0  -2  308.28    8.98
   4   0  -2  325.46    9.79
   4   0  -2  355.61    8.91
  -4   0   2  278.98    8.83
  -4   0   2  334.12   10.21
  -4   0   2  322.42    9.54
  -4   0   2  321.70    9.28
   4   0  -1    9.35    0.47
   4   0  -1    7.53    0.40
   4   0  -1    7.82    0.36
   4   0  -1    6.04    0.47
   4   0  -1    6.18    0.59
  -4   0   1    5.91    0.44
  -4   0   1    8.02    0.40
  -4   0   1    7.34    0.48
  -4   0   1    8.19    0.29
   4   0   0 4225.68  314.88
   4   0   0 3888.56  286.67
   4   0   0 4047.02  301.96
   4   0   0 3990.91  287.09
   4   0   0 3908.11  287.12
  -4   0   0 4124.31  296.18
  -4   0   0 4052.20  302.30
  -4   0   0 3990.33  296.37
  -4   0   0 4109.97  298.76
  -4   0   0 4128.63  306.02
   4   0   1    3.04    1.02
   4   0   1    3.53    0.59
   4   0   1    4.00    0.59
   4   0   1    4.41    0.20
  -4   0  -1    3.39    0.63
  -4   0  -1    3.52    1.08
  -4   0  -1    3.19    0.55
  -4   0  -1    4.54    0.31
   4   0   2 2583.21  167.23
   4   0   2 2578.97  173.54
   4   0   2 2374.89  159.16
  -4   0  -2 2727.44  174.96
  -4   0  -2 2641.59  174.13
  -4   0  -2 2316.52  151.71
  -4   0  -2 2587.71  167.69
  -4   0  -2 2450.97  159.72
   4   0   3    6.39    1.77
   4   0   3    8.50    1.62
   4   0   3    5.82    1.82
   4   0   3    4.94    1.38
  -4   0  -3    5.15    1.40
  -4   0  -3   13.55    1.62
   4   0   4  145.09    6.51
   4   0   4  138.39    5.33
   4   0   4  142.36    6.20
   4   0   4  139.52    6.04
  -4   0  -4  156.61    6.52
  -4   0  -4  145.23    5.89
  -4   0  -4  138.63    5.46
   4   0   5    6.85    1.19
   4   0   5    6.00    0.76
  -4   0  -5    0.35    1.11
  -4   0  -5    6.02    0.79
  -4   0  -5    7.16    0.98
   4   0   6  135.10    5.96
   4   0   6  123.27    8.18
   4   0   6  138.20    6.56
   4   0   6  117.31    4.66
  -4   0  -6  136.16    5.84
  -4   0  -6  136.29    6.36
  -4   0  -6  127.43    4.96
   4   0   7   -0.09    0.65
   4   0   7    0.60    0.77
   4   0   7    0.22    0.76
   4   0   7   -0.00    0.42
  -4   0  -7    0.71    0.70
  -4   0  -7    0.05    0.44
  -4   0  -7    0.67    0.63
   4   0   8   61.82    2.85
   4   0   8   57.95    4.52
   4   0   8   53.03    4.41
  -4   0  -8   54.12    4.05
  -4   0  -8   64.13    5.79
  -4   0  -8   54.13    2.76
   4   0   9    0.05    0.65
   4   0   9    2.26    1.24
   4   0   9    2.59    1.24
  -4   0  -9    1.61    0.65
  -4   0  -9    1.36    1.14
  -4   0  -9    1.01    1.09
  -4   0  -9    2.30    1.01
   4   0  10  309.20   17.37
   4   0  10  325.73   18.92
  -4   0 -10  287.50   13.49
  -4   0 -10  329.07   17.38
  -4   0 -10  319.33   16.20
  -4   0 -10  346.95   18.35
   4   0  11   -0.14    0.88
   4   0  11    0.99    0.92
  -4   0 -11   -0.39    0.81
  -4   0 -11   -0.84    0.75
  -4   0 -11    0.40    0.69
   4   0  12   12.16    2.75
   4   0  12   11.01    2.97
  -4   0 -12   15.89    2.49
  -4   0 -12   15.93    2.30
   4   0  13   -0.22    1.71
   4   0  13    0.75    1.14
  -4   0 -13   -0.26    0.89
   4   0  14  114.11    9.28
   4   0  14  101.51    9.55
  -4   0 -14  108.78    8.47
   4   0  15    0.70    2.77
   4   0  15    0.73    1.90
  -4   0 -15    1.47    1.37
   4   0  16   11.52    3.57
   4   0  16   13.78    3.58
   4   0  17    0.28    1.80
   4   0  17    1.41    1.81
   4   0  18   54.45   11.24
   4   0  18   70.80    7.40
   4   0  19   -1.64    1.79
   4   0  19    0.07    1.82
   4   0  20    4.03    2.60
   4   0  20    6.98    2.64
   4   0  21   -0.59    1.48
   4   0  21   -0.28    2.02
   4   0  22   -0.24    1.09
   4   0  22    4.09    1.63
   4   0  23   -0.14    1.06
   4   2 -25   59.73    5.76
  -4   2  25   64.77    5.47
  -4  -2  25   43.73    4.53
  -4   2  24   36.12    4.46
  -4  -2  24   36.68    4.59
  -4  -2  24   21.93    3.85
  -4   2  23    4.76    2.18
  -4  -2  23    3.27    2.13
   4  -2 -23    0.11    1.70
  -4  -2  23    5.57    2.15
  -4   2  22    0.50    1.47
  -4  -2  22   -0.42    2.36
   4  -2 -22   -0.33    1.26
  -4  -2  22   -1.57    2.30
  -4   2  21   69.62    7.56
   4  -2 -21   52.06    6.99
  -4  -2  21   58.91    7.36
  -4  -2  21   68.15    7.27
  -4   2  20    2.65    2.21
   4  -2 -20    2.41    2.08
  -4  -2  20    1.82    3.27
  -4  -2  20    1.77    2.34
  -4   2  19   21.37    3.82
  -4   2  19   18.23    4.14
  -4  -2  19   15.79    4.37
  -4  -2  19   18.67    3.90
  -4   2  18  100.68    9.24
  -4   2  18  105.34    8.63
  -4  -2  18   87.63    8.61
  -4  -2  18   90.16    9.72
  -4   2  17   13.37    3.50
  -4   2  17   12.58    4.96
  -4  -2  17   11.69    3.24
  -4  -2  17   13.00    3.73
  -4   2  16  176.84   12.96
  -4   2  16  170.38   11.55
  -4  -2  16  166.87   13.26
  -4  -2  16  158.85   11.48
  -4   2  15  134.41    9.20
  -4   2  15  137.45   10.37
  -4  -2  15  116.24    8.76
  -4  -2  15  123.29   10.37
   4   2 -14    1.22    2.01
  -4   2  14   -0.26    1.56
   4   2 -14    4.64    1.31
  -4   2  14    0.38    1.37
   4  -2 -14    1.08    1.60
  -4  -2  14    1.88    1.63
   4  -2 -14    0.18    1.27
  -4  -2  14    1.51    2.16
   4   2 -13   27.14    2.99
   4   2 -13   30.45    3.14
  -4   2  13   30.42    3.71
  -4   2  13   22.52    2.44
  -4   2  13   28.56    3.38
  -4  -2  13   23.25    3.92
   4  -2 -13   26.31    3.07
   4  -2 -13   27.02    2.44
   4  -2 -13   24.69    3.82
  -4  -2  13   23.61    3.16
  -4   2  12 1092.98   64.52
   4   2 -12 1004.94   52.13
   4   2 -12 1050.09   60.19
  -4   2  12  935.43   55.33
  -4   2  12  967.12   58.39
   4  -2 -12 1028.62   54.26
   4  -2 -12  988.67   68.21
   4  -2 -12  953.96   50.36
   4  -2 -12  934.21   54.87
  -4  -2  12  994.55   51.96
  -4  -2  12  978.90   62.36
   4  -2 -12  831.44   43.31
  -4  -2  12  885.71   53.45
  -4   2  11  159.49    9.33
  -4   2  11  156.25    6.92
   4   2 -11  171.43    8.86
   4   2 -11  161.06    7.32
   4   2 -11  149.63    5.89
   4   2 -11  147.27    5.10
  -4   2  11  146.27    6.80
  -4   2  11  165.56    9.13
   4  -2 -11  133.49    5.24
  -4  -2  11  159.58    6.42
  -4  -2  11  148.44    9.87
   4  -2 -11  144.54    5.80
   4  -2 -11  141.61    8.12
  -4  -2  11  145.88    8.38
  -4   2  10    7.99    1.22
   4   2 -10   15.22    2.21
  -4   2  10   11.18    2.36
   4   2 -10   11.65    0.65
   4   2 -10   12.34    1.15
   4   2 -10   10.73    0.95
  -4   2  10   11.89    1.44
  -4   2  10   13.11    2.12
   4  -2 -10   10.67    1.14
   4  -2 -10    9.98    0.85
   4  -2 -10   11.71    1.94
  -4  -2  10   13.51    0.46
  -4  -2  10   14.18    1.31
   4  -2 -10    8.16    2.62
  -4  -2  10   10.97    1.99
  -4  -2  10   12.90    2.55
  -4   2   9 1605.36  100.60
   4   2  -9 1557.23  103.01
   4   2  -9 1569.75   80.97
  -4   2   9 1554.23   89.66
   4   2  -9 1579.99   90.07
  -4   2   9 1510.50   92.42
  -4   2   9 1648.36   96.19
   4   2  -9 1516.92   77.53
   4  -2  -9 1519.33   92.53
  -4  -2   9 1638.40  104.91
   4  -2  -9 1610.52  104.74
   4  -2  -9 1240.70   67.86
  -4  -2   9 1348.70   84.55
  -4  -2   9 1399.93   73.62
   4  -2  -9 1646.82   93.65
  -4  -2   9 1448.06   87.75
   4   2  -8  259.29   12.14
   4   2  -8  284.02    7.99
   4   2  -8  282.33    7.99
   4   2  -8  307.39   11.97
  -4   2   8  295.36   14.46
  -4   2   8  285.61   10.27
   4   2  -8  324.67   17.92
  -4   2   8  310.85   12.72
  -4   2   8  280.54   12.44
   4  -2  -8  301.56   15.51
   4  -2  -8  240.75    8.79
  -4  -2   8  273.63   12.56
  -4  -2   8  302.09   10.32
  -4  -2   8  293.22   17.82
  -4  -2   8  260.45   10.86
   4  -2  -8  275.29   14.84
  -4   2   7   71.36    3.57
   4   2  -7   79.16    6.30
   4   2  -7   79.74    3.23
  -4   2   7   70.36    5.14
  -4   2   7   74.78    2.70
  -4   2   7   70.93    4.66
  -4   2   7   72.33    4.50
   4  -2  -7   69.58    3.61
  -4  -2   7   77.07    2.76
  -4  -2   7   66.62    3.03
   4  -2  -7   71.75    4.74
  -4  -2   7   75.07    4.51
  -4  -2   7   68.78    3.56
   4   2  -6   11.40    1.28
  -4   2   6   15.07    0.48
  -4   2   6   15.74    1.63
   4   2  -6   12.51    1.84
  -4   2   6   15.02    1.90
  -4   2   6   14.70    0.35
  -4   2   6   17.09    1.52
  -4  -2   6   11.24    1.29
   4  -2  -6   17.16    3.13
  -4  -2   6   15.73    2.96
   4  -2  -6   17.20    1.49
  -4  -2   6   12.74    2.29
  -4  -2   6   11.89    1.17
   4   2  -5 1701.45   99.46
  -4   2   5 1663.25   98.31
  -4   2   5 1709.78  100.48
   4   2  -5 1764.10  107.89
  -4   2   5 1697.63  108.57
  -4   2   5 1778.45  112.51
   4  -2  -5 1632.71  101.92
   4  -2  -5 1655.50  101.99
  -4  -2   5 1605.84   94.45
  -4  -2   5 1635.84   97.04
  -4  -2   5 1650.76  101.22
  -4  -2   5 1690.27   99.08
   4  -2  -5 1699.26  100.31
  -4   2   4 6209.80  587.30
   4   2  -4 5671.79  531.26
   4   2  -4 6208.12  578.65
  -4   2   4 6537.04  622.33
  -4   2   4 6012.99  564.55
  -4   2   4 6309.93  585.32
   4  -2  -4 6648.81  629.63
   4  -2  -4 6345.63  592.42
  -4  -2   4 5724.38  535.79
   4  -2  -4 6291.69  599.49
  -4  -2   4 6243.79  595.51
   4  -2  -4 5717.20  533.38
  -4  -2   4 6753.90  632.48
  -4   2   3 5146.70  442.69
   4   2  -3 5055.81  443.86
   4   2  -3 5380.88  478.18
   4   2  -3 5333.08  469.27
  -4   2   3 5031.54  438.94
   4   2  -3 5274.63  452.01
  -4   2   3 4954.25  436.31
  -4   2   3 5674.76  503.39
   4  -2  -3 5583.73  490.68
   4  -2  -3 5334.01  472.82
   4  -2  -3 4927.95  435.57
   4  -2  -3 5375.69  469.20
  -4  -2   3 4756.87  414.31
  -4  -2   3 5251.78  463.85
  -4  -2   3 4604.75  374.04
  -4  -2   3 4979.21  433.80
  -4  -2   3 4656.75  379.56
   4   2  -2 3253.83  236.42
   4   2  -2 3284.50  234.21
   4   2  -2 3223.47  234.58
   4   2  -2 3455.26  253.81
  -4   2   2 3362.09  242.88
  -4   2   2 3095.91  227.17
  -4   2   2 3121.63  226.44
  -4   2   2 3182.64  242.79
  -4   2   2 3105.80  202.41
   4  -2  -2 3067.26  234.05
  -4  -2   2 3237.43  230.65
   4  -2  -2 2751.43  187.12
   4  -2  -2 3124.11  226.24
   4  -2  -2 3321.50  242.14
   4  -2  -2 3122.22  226.48
  -4  -2   2 3310.42  259.67
  -4  -2   2 2919.60  205.93
  -4  -2   2 2937.84  204.94
  -4  -2   2 3084.05  225.06
  -4   2   1   78.96    5.30
  -4   2   1   83.61    5.33
  -4   2   1   81.31    6.63
   4   2  -1   89.75    4.49
   4   2  -1   91.94    6.94
   4   2  -1   88.34    5.60
   4   2  -1   86.59    6.15
  -4   2   1   78.79    4.27
  -4   2   1   78.57    5.30
  -4   2   1   86.64    3.03
   4  -2  -1   76.30    3.93
   4  -2  -1   81.55    5.06
   4  -2  -1   77.44    3.39
  -4  -2   1   91.52    5.48
  -4  -2   1   95.82   10.56
  -4  -2   1   89.94    5.12
  -4  -2   1   82.61    4.05
   4  -2  -1   86.25    6.47
  -4   2   0 2067.65  130.13
   4   2   0 1919.77  120.65
   4   2   0 1811.77  110.17
  -4   2   0 2048.87  134.18
  -4   2   0 1906.47  114.36
  -4   2   0 1997.47  132.06
   4   2   0 1944.35  123.00
  -4   2   0 1939.78  114.62
   4  -2   0 2013.80  129.67
  -4  -2   0 2075.72  128.10
  -4  -2   0 1935.07  120.93
   4  -2   0 2225.80  143.43
   4  -2   0 1987.74  116.28
  -4  -2   0 1881.00  126.30
  -4  -2   0 1871.10  121.77
   4  -2   0 2156.80  133.77
  -4  -2   0 2072.83  131.78
   4  -2   0 2059.83  126.04
  -4   2  -1 4130.74  335.09
  -4   2  -1 4229.34  331.57
   4   2   1 4112.36  321.42
   4   2   1 3946.74  301.28
  -4   2  -1 3810.34  289.48
   4   2   1 3984.48  318.56
   4   2   1 3779.63  296.05
   4   2   1 3715.93  289.57
  -4   2  -1 4359.56  333.06
   4  -2   1 3905.35  303.75
   4  -2   1 4204.95  323.91
   4  -2   1 4157.73  333.50
  -4  -2  -1 4100.37  319.75
  -4  -2  -1 3721.76  299.20
   4  -2   1 3703.69  295.30
   4  -2   1 3666.11  276.05
   4  -2   1 4178.96  326.78
  -4  -2  -1 4102.43  325.14
  -4  -2  -1 3842.36  302.39
  -4  -2  -1 3843.54  316.04
  -4   2  -2  124.29    3.93
   4   2   2  114.79    4.26
   4   2   2  135.61    5.31
  -4   2  -2  123.10    4.93
   4   2   2  130.13    5.79
  -4   2  -2  114.83    7.46
   4   2   2  132.53    4.47
  -4   2  -2  121.74    6.13
   4  -2   2  120.93    4.58
   4  -2   2  122.06    5.75
   4  -2   2  121.05    4.07
   4  -2   2  119.09    4.53
  -4  -2  -2  126.09    7.57
   4  -2   2  122.60    7.41
   4  -2   2  131.99    6.07
  -4  -2  -2  130.36    6.92
  -4  -2  -2  137.29    5.47
  -4  -2  -2  135.45    5.23
  -4  -2  -2  130.19    6.19
  -4   2  -3   53.29    3.40
   4   2   3   52.74    3.19
   4   2   3   48.42    2.14
  -4   2  -3   67.90    2.95
  -4   2  -3   65.65    2.47
   4   2   3   48.31    2.63
  -4   2  -3   58.62    3.16
   4  -2   3   60.77    2.31
   4  -2   3   62.03    4.73
   4  -2   3   60.65    3.30
  -4  -2  -3   52.86    4.24
   4  -2   3   64.99    4.42
   4  -2   3   60.89    2.26
  -4  -2  -3   51.01    3.65
  -4  -2  -3   49.65    2.80
  -4  -2  -3   58.55    2.51
   4   2   4  461.96   19.81
   4   2   4  524.53   23.42
   4   2   4  559.03   26.04
  -4   2  -4  556.81   28.71
  -4   2  -4  497.22   19.39
  -4   2  -4  538.15   24.92
   4   2   4  490.50   21.86
  -4   2  -4  563.54   24.84
   4  -2   4  492.79   21.04
   4  -2   4  493.28   23.53
  -4  -2  -4  495.83   22.90
  -4  -2  -4  518.90   26.00
   4  -2   4  530.05   28.44
   4  -2   4  546.51   23.97
   4  -2   4  572.18   23.50
  -4  -2  -4  556.44   22.88
  -4  -2  -4  559.11   26.90
   4   2   5  358.02   14.55
  -4   2  -5  391.34   17.54
   4   2   5  322.96   13.96
   4   2   5  426.62   18.50
   4   2   5  402.29   18.60
  -4   2  -5  384.97   20.23
  -4   2  -5  351.28   17.35
   4  -2   5  356.26   15.46
   4  -2   5  359.70   17.44
   4  -2   5  393.47   14.21
   4  -2   5  366.71   18.32
  -4  -2  -5  401.49   20.16
   4  -2   5  341.47   12.60
  -4  -2  -5  412.66   18.18
  -4  -2  -5  405.40   19.68
  -4  -2  -5  402.87   15.52
   4   2   6 3222.58  250.17
   4   2   6 3360.81  256.86
   4   2   6 3014.14  225.88
  -4   2  -6 3003.58  215.29
  -4   2  -6 3240.23  249.57
  -4   2  -6 3356.54  262.69
  -4   2  -6 3595.90  272.26
   4  -2   6 3323.69  247.38
  -4  -2  -6 2734.96  205.53
   4  -2   6 3427.94  238.77
   4  -2   6 2937.32  231.32
  -4  -2  -6 2890.95  225.55
   4  -2   6 3221.32  225.12
  -4  -2  -6 3552.74  254.43
   4  -2   6 3185.68  253.78
  -4  -2  -6 3297.70  253.33
  -4  -2  -6 3223.75  259.26
  -4   2  -7  334.98   15.87
  -4   2  -7  307.39   12.26
   4   2   7  320.47   17.14
  -4   2  -7  329.68   17.84
   4   2   7  376.98   18.23
   4   2   7  359.76   18.24
  -4   2  -7  353.30   20.32
   4  -2   7  320.90   10.95
   4  -2   7  312.79   15.85
  -4  -2  -7  304.52   13.78
  -4  -2  -7  282.74   15.03
   4  -2   7  352.24   12.38
   4  -2   7  300.89   16.38
  -4  -2  -7  361.72   14.53
   4  -2   7  325.23   18.51
  -4  -2  -7  366.69   18.66
  -4  -2  -7  365.79   19.88
   4   2   8   13.77    2.21
  -4   2  -8    8.50    0.92
  -4   2  -8   10.14    2.22
   4   2   8   13.39    1.56
  -4   2  -8   11.38    1.85
   4   2   8   13.06    3.65
  -4   2  -8    9.86    1.47
   4  -2   8    9.56    1.24
  -4  -2  -8   11.62    1.58
   4  -2   8   12.02    2.53
  -4  -2  -8    8.41    2.46
   4  -2   8   12.93    2.15
  -4  -2  -8    9.03    1.32
  -4  -2  -8    8.98    1.85
   4   2   9   45.05    4.10
  -4   2  -9   46.86    5.38
  -4   2  -9   36.30    2.09
   4   2   9   37.80    3.15
   4   2   9   48.83    4.28
  -4   2  -9   38.03    2.81
  -4   2  -9   43.55    4.05
   4  -2   9   40.78    2.22
   4  -2   9   42.42    3.96
   4  -2   9   44.55    4.62
  -4  -2  -9   33.71    3.54
  -4  -2  -9   33.39    2.51
  -4  -2  -9   42.01    2.98
   4   2  10  479.96   27.45
   4   2  10  550.27   30.84
  -4   2 -10  528.38   34.16
  -4   2 -10  564.86   29.61
   4   2  10  504.39   29.45
   4  -2  10  520.73   32.34
  -4  -2 -10  473.03   26.61
  -4  -2 -10  457.70   24.07
  -4  -2 -10  478.69   23.99
   4  -2  10  489.56   28.10
   4   2  11   26.42    3.60
   4   2  11   18.92    4.42
   4   2  11   31.89    3.72
   4  -2  11   22.83    4.05
   4  -2  11   18.38    3.39
  -4  -2 -11   21.92    3.12
  -4  -2 -11   19.96    2.17
   4   2  12   37.67    6.49
   4   2  12   55.19    5.43
   4   2  12   53.56    5.37
   4  -2  12   50.90    5.23
   4  -2  12   50.26    6.08
  -4  -2 -12   43.92    3.47
   4   2  13    0.74    1.12
   4   2  13    2.07    2.22
   4  -2  13   -0.18    1.56
   4  -2  13   -0.56    1.29
  -4  -2 -13    0.21    1.33
   4   2  14    4.03    2.48
   4   2  14    9.38    2.76
   4  -2  14    6.83    3.22
   4  -2  14    5.17    4.40
  -4  -2 -14    8.73    2.88
   4   2  15  103.59    9.22
   4  -2  15  103.50    9.30
   4  -2  15   86.15   10.30
  -4  -2 -15   99.49    9.56
   4   2  16   19.98    4.30
   4  -2  16   20.89    4.13
   4  -2  16   16.89    4.86
  -4  -2 -16   19.64    4.32
   4   2  17   71.63    7.38
   4  -2  17   66.48    7.67
   4  -2  17   52.68    8.17
  -4  -2 -17   61.73    7.42
   4   2  18   57.75    6.72
   4  -2  18   44.01   10.88
   4  -2  18   57.26    6.78
  -4  -2 -18   40.46    5.87
   4   2  19    9.10    2.83
   4  -2  19    9.64    3.26
   4  -2  19   10.48    2.99
  -4  -2 -19    0.20    2.39
   4   2  20    7.20    2.50
   4  -2  20    4.85    2.53
   4  -2  20    2.06    2.65
  -4  -2 -20    4.36    1.94
   4   2  21    2.23    2.66
   4  -2  21    1.36    1.69
   4  -2  21    1.92    1.68
  -4  -2 -21    0.31    1.12
  -4   2 -22  117.26    9.61
   4   2  22  135.48   12.39
   4  -2  22  105.93    8.72
   4   4 -24   -0.00    2.89
  -4   4  24    5.17    1.88
   4  -4 -24    4.20    1.74
  -4  -4  24    2.62    2.50
   4   4 -23    0.00    1.21
  -4   4  23   -1.33    1.24
   4  -4 -23    1.43    1.79
  -4  -4  23   -0.07    1.13
   4   4 -22   99.93    9.24
  -4   4  22  113.75    9.18
   4  -4 -22  108.88   13.92
  -4  -4  22   85.20    8.49
   4   4 -21    3.65    3.93
  -4   4  21    3.79    2.41
  -4  -4  21    4.11    2.58
   4  -4 -21    4.41    2.62
   4   4 -20   27.57    5.12
  -4   4  20   31.20    5.20
   4  -4 -20   27.77    5.76
  -4  -4  20   25.23    5.32
   4   4 -19  121.61   12.10
  -4   4  19  147.73   17.01
  -4   4  19  152.17   12.41
  -4  -4  19  146.70   18.27
   4   4 -18    0.58    1.89
  -4   4  18    1.34    2.00
  -4   4  18    0.65    1.87
  -4  -4  18    1.18    2.01
  -4   4  17   28.72    5.32
  -4   4  17   25.16    5.13
  -4  -4  17   23.20    4.51
  -4  -4  17   28.16    5.24
  -4   4  16   18.73    4.10
  -4   4  16   15.59    4.00
  -4  -4  16   12.57    6.67
  -4  -4  16   11.61    3.42
  -4   4  15   42.25    8.64
  -4   4  15   44.49    5.81
  -4  -4  15   38.27    5.07
  -4  -4  15   34.94    6.00
  -4   4  14   48.75    5.88
  -4   4  14   49.77    5.61
  -4  -4  14   48.77    6.18
  -4  -4  14   40.58    4.97
  -4   4  13  306.86   18.80
  -4   4  13  279.93   21.48
  -4  -4  13  249.43   17.81
  -4  -4  13  252.12   15.90
  -4   4  12   58.33    5.71
  -4   4  12   57.93    5.38
  -4  -4  12   51.60    5.05
   4  -4 -12   51.83    5.80
  -4  -4  12   49.67    5.84
   4  -4 -12   57.86    5.82
   4   4 -11  529.67   29.10
  -4   4  11  484.90   27.64
  -4   4  11  490.42   29.14
   4  -4 -11  477.54   26.00
   4  -4 -11  519.79   28.22
  -4  -4  11  454.25   25.13
   4  -4 -11  477.20   27.91
  -4  -4  11  471.71   25.13
  -4  -4  11  470.16   27.26
   4  -4 -11  499.94   31.80
  -4  -4  11  454.23   28.62
   4   4 -10  273.44   18.35
   4   4 -10  227.28   14.25
   4   4 -10  260.86   12.91
  -4   4  10  258.06   14.89
  -4   4  10  240.13   13.40
   4  -4 -10  242.31   13.02
   4  -4 -10  228.91   14.27
   4  -4 -10  256.52   13.43
   4  -4 -10  251.34   16.36
  -4  -4  10  255.41   15.29
  -4  -4  10  228.55   11.86
   4   4  -9  243.13   12.21
   4   4  -9  241.91   11.65
  -4   4   9  242.87   14.01
   4   4  -9  237.42   13.26
  -4   4   9  242.26   13.20
   4   4  -9  231.45   13.90
   4  -4  -9  240.11   15.09
   4  -4  -9  229.12   13.55
   4  -4  -9  240.59   12.95
  -4  -4   9  212.95   11.18
  -4  -4   9  251.85   14.60
   4  -4  -9  251.00   12.98
  -4  -4   9  244.27   11.75
  -4   4   8  410.72   22.22
   4   4  -8  388.29   22.17
   4   4  -8  404.13   21.96
   4   4  -8  378.99   20.86
  -4   4   8  400.50   24.73
  -4   4   8  393.33   22.27
   4   4  -8  401.28   20.21
   4  -4  -8  411.62   21.15
  -4  -4   8  411.36   20.61
   4  -4  -8  400.05   26.27
  -4  -4   8  377.63   21.30
   4  -4  -8  374.68   22.24
  -4  -4   8  359.99   18.79
   4   4  -7  156.47    8.17
   4   4  -7  149.99    8.87
  -4   4   7  159.95    8.74
   4   4  -7  153.87    8.91
  -4   4   7  142.19    9.46
   4   4  -7  131.16    7.51
  -4   4   7  165.13    9.42
   4  -4  -7  155.32    9.67
   4  -4  -7  168.15    8.91
  -4  -4   7  134.11    7.61
  -4  -4   7  148.90    8.81
   4  -4  -7  146.26    9.06
  -4  -4   7  150.66    8.37
   4   4  -6 3276.78  262.58
   4   4  -6 3163.70  254.42
  -4   4   6 3253.26  257.43
   4   4  -6 3278.73  261.76
   4   4  -6 3087.47  251.67
  -4   4   6 3206.49  265.09
  -4   4   6 3403.19  271.73
   4  -4  -6 3285.11  261.83
  -4  -4   6 3251.91  265.94
   4  -4  -6 3334.13  268.76
   4  -4  -6 3146.39  258.60
  -4  -4   6 3126.58  248.88
  -4  -4   6 3313.41  264.80
  -4   4   5   95.03    5.98
   4   4  -5  105.64    6.15
   4   4  -5   99.23    8.12
   4   4  -5  102.41    6.11
   4   4  -5  107.99    6.58
  -4   4   5   95.56    6.05
  -4   4   5   90.70    7.22
   4  -4  -5   87.62    6.23
  -4  -4   5  108.77    8.14
  -4  -4   5  100.12    6.65
   4  -4  -5   90.27    6.61
   4  -4  -5   86.91    5.84
  -4  -4   5   99.24    5.95
  -4   4   4  842.02   50.62
   4   4  -4  849.23   46.55
   4   4  -4  871.98   54.69
   4   4  -4  833.21   46.83
  -4   4   4  894.61   47.85
  -4   4   4  833.59   45.98
   4   4  -4  852.28   47.00
   4  -4  -4  861.58   49.49
   4  -4  -4  872.33   49.11
   4  -4  -4  860.58   51.11
   4  -4  -4  827.88   45.71
   4  -4  -4  743.89   47.05
  -4  -4   4  874.54   49.72
  -4  -4   4  817.77   45.57
  -4  -4   4  825.04   49.59
   4   4  -3  137.35    8.02
   4   4  -3  139.54    8.67
   4   4  -3  139.39    7.28
   4   4  -3  135.08    7.45
  -4   4   3  137.91    8.72
  -4   4   3  151.27   10.70
  -4   4   3  157.73    4.05
  -4   4   3  135.52    9.43
   4  -4  -3  139.96    7.76
   4  -4  -3  147.19    9.42
  -4  -4   3  128.16    4.96
  -4  -4   3  141.65    6.50
   4  -4  -3  130.78   11.38
  -4  -4   3  141.76    7.92
  -4  -4   3  143.41    9.29
  -4  -4   3  138.35    5.31
   4  -4  -3  151.46    9.03
   4  -4  -3  142.55    9.63
  -4   4   2  161.30    8.90
  -4   4   2  161.96    7.45
   4   4  -2  168.90    8.22
   4   4  -2  177.63   10.34
   4   4  -2  176.25    9.69
  -4   4   2  162.96    5.30
   4   4  -2  189.05    8.75
  -4   4   2  160.25   10.90
  -4   4   2  168.14    9.37
  -4  -4   2  176.34   14.87
  -4  -4   2  187.33    6.90
   4  -4  -2  153.65    8.66
   4  -4  -2  181.04   11.78
  -4  -4   2  159.31    6.44
  -4  -4   2  193.83    7.95
  -4  -4   2  182.44    9.45
   4  -4  -2  176.85    7.79
   4  -4  -2  161.58    9.29
   4   4  -1  102.45    9.96
  -4   4   1   99.89    4.51
  -4   4   1  103.55    3.75
  -4   4   1  102.55   11.44
   4   4  -1  101.04    5.12
  -4   4   1  104.64    6.52
   4   4  -1  119.66    5.81
  -4   4   1  109.45    6.33
   4  -4  -1  105.76    6.41
   4  -4  -1  103.14    7.75
  -4  -4   1  101.62    4.27
  -4  -4   1   99.54    6.59
   4  -4  -1  102.20    3.78
   4  -4  -1  107.24    6.10
  -4  -4   1   95.68    5.92
   4  -4  -1  107.53    5.80
  -4  -4   1  100.51    8.03
  -4  -4   1  112.00    6.60
   4   4   0  325.38   13.73
   4   4   0  300.44   17.23
   4   4   0  325.61   15.03
  -4   4   0  303.83   19.21
  -4   4   0  302.50   15.83
  -4   4   0  301.42   17.92
   4   4   0  308.33   13.79
  -4   4   0  301.30   12.17
  -4   4   0  315.26   12.45
   4  -4   0  308.28   12.06
   4  -4   0  303.03   15.42
  -4  -4   0  289.87   15.38
   4  -4   0  313.02   12.90
  -4  -4   0  317.87   16.01
   4  -4   0  309.47   15.21
  -4  -4   0  280.94   13.55
  -4  -4   0  293.21   15.44
   4  -4   0  299.75   22.00
  -4  -4   0  282.99   18.05
   4   4   1  693.70   37.42
   4   4   1  802.59   38.03
  -4   4  -1  769.89   42.46
  -4   4  -1  854.97   40.69
  -4   4  -1  775.27   35.21
  -4   4  -1  727.90   41.35
   4   4   1  825.29   41.21
   4   4   1  761.03   40.93
  -4   4  -1  721.01   44.09
   4  -4   1  730.36   37.29
  -4  -4  -1  737.88   40.74
  -4  -4  -1  708.01   44.13
  -4  -4  -1  757.27   47.16
   4  -4   1  733.48   40.06
   4  -4   1  747.01   40.02
  -4  -4  -1  755.34   43.43
   4  -4   1  815.72   47.14
   4  -4   1  845.08   36.98
  -4  -4  -1  683.29   38.17
   4   4   2 1908.08  119.57
   4   4   2 1951.02  125.43
   4   4   2 1894.18  123.17
   4   4   2 1933.91  117.99
  -4   4  -2 1867.45  132.12
  -4   4  -2 1715.05  116.61
  -4   4  -2 1924.58  111.14
  -4   4  -2 1794.93  122.53
  -4   4  -2 1850.22  116.95
   4  -4   2 1780.95  117.08
  -4  -4  -2 1793.21  131.36
  -4  -4  -2 1775.75  121.72
   4  -4   2 1722.20  120.17
  -4  -4  -2 1715.11  121.28
  -4  -4  -2 1876.00  124.24
   4  -4   2 1838.82  127.89
   4  -4   2 1830.16  124.66
   4  -4   2 1842.81  104.62
  -4  -4  -2 1856.38  127.83
   4   4   3  228.37    9.48
   4   4   3  255.30   10.92
   4   4   3  283.22   13.49
  -4   4  -3  259.22   15.49
  -4   4  -3  279.33   14.30
   4   4   3  258.29   12.82
  -4   4  -3  291.26   14.36
  -4   4  -3  267.01   14.57
  -4  -4  -3  243.72   13.74
   4  -4   3  263.84   13.15
  -4  -4  -3  270.74   14.68
   4  -4   3  254.38   12.61
  -4  -4  -3  204.55   15.38
  -4  -4  -3  265.37   13.31
   4  -4   3  288.53   14.95
   4  -4   3  265.35   12.37
  -4   4  -4  575.75   34.70
   4   4   4  583.59   29.49
   4   4   4  585.54   30.02
   4   4   4  512.30   24.02
  -4   4  -4  539.32   30.46
   4   4   4  458.14   20.90
  -4   4  -4  626.21   29.62
  -4   4  -4  552.44   31.80
   4  -4   4  554.37   29.84
   4  -4   4  555.20   27.34
   4  -4   4  515.36   31.79
   4  -4   4  495.19   28.27
  -4  -4  -4  572.71   29.23
  -4  -4  -4  511.08   27.90
  -4  -4  -4  539.10   30.57
  -4  -4  -4  541.36   29.25
  -4   4  -5    6.00    1.88
   4   4   5    3.51    0.84
  -4   4  -5    5.33    1.36
  -4   4  -5    7.71    2.67
   4   4   5    3.47    0.76
  -4   4  -5    7.79    1.85
   4   4   5    5.41    1.68
   4   4   5    5.02    2.35
  -4  -4  -5    6.96    1.33
  -4  -4  -5    5.73    1.64
   4  -4   5    4.88    1.71
   4  -4   5    8.31    1.48
  -4  -4  -5    5.04    1.61
   4  -4   5    7.37    1.18
   4  -4   5    6.01    1.13
  -4  -4  -5    5.06    1.95
   4   4   6   98.16    5.83
   4   4   6   96.52    4.47
  -4   4  -6  119.67    8.41
  -4   4  -6  137.46    7.18
   4   4   6  130.03    9.49
  -4   4  -6  114.77    7.42
  -4   4  -6  116.73    7.58
   4   4   6  123.68    7.54
   4  -4   6  111.26    5.63
  -4  -4  -6  131.02    7.44
  -4  -4  -6  118.37    6.42
  -4  -4  -6  120.21    8.41
   4  -4   6  117.79    7.22
   4  -4   6  127.78    8.57
   4  -4   6  125.00    7.93
  -4  -4  -6  102.85    6.84
  -4   4  -7  100.59    7.09
  -4   4  -7  102.14    8.02
  -4   4  -7  107.80    6.49
   4   4   7  121.13    9.27
   4   4   7  112.50   10.25
  -4   4  -7  112.23    7.51
   4  -4   7  102.08    7.63
   4  -4   7  108.22    5.95
  -4  -4  -7   97.84    8.24
  -4  -4  -7   96.06    6.63
  -4  -4  -7  104.70    7.41
   4  -4   7  101.28    6.72
  -4  -4  -7  114.06    6.77
   4  -4   7   98.97    4.93
  -4   4  -8   95.31    8.06
  -4   4  -8   88.26    7.07
   4   4   8   91.81    6.86
   4   4   8   86.31    8.67
  -4   4  -8   82.92    6.22
   4  -4   8   84.05    7.22
   4  -4   8   78.69    6.68
  -4  -4  -8   84.35    5.67
  -4  -4  -8   85.18   11.09
  -4  -4  -8   87.15    4.94
  -4  -4  -8   76.37    6.11
   4  -4   8   86.33    5.16
   4   4   9    2.09    1.52
   4   4   9    0.35    1.35
   4  -4   9    3.43    1.65
   4  -4   9    0.79    1.51
  -4  -4  -9    0.73    1.14
   4   4  10    1.11    2.78
   4   4  10    1.02    1.56
   4  -4  10    2.59    1.87
   4  -4  10    1.38    1.70
  -4  -4 -10    1.68    1.23
   4   4  11   37.68    5.06
   4   4  11   32.60    4.79
   4  -4  11   33.02    5.45
   4  -4  11   29.27    4.86
  -4  -4 -11   33.85    4.02
   4   4  12  115.18    9.90
   4   4  12  113.93   10.24
   4  -4  12  103.74   10.49
   4  -4  12  104.54    9.93
   4   4  13    7.55    3.28
   4  -4  13   10.34    3.56
   4  -4  13    9.54    3.19
  -4  -4 -13    7.50    3.84
   4   4  14    1.66    3.21
   4  -4  14   -0.15    1.93
   4  -4  14    1.44    2.11
  -4  -4 -14    1.88    2.20
   4   4  15   72.43    8.14
  -4   4 -15   58.71    8.56
  -4  -4 -15   71.40    8.93
   4  -4  15   57.76    8.53
  -4   4 -16    5.28    2.63
   4   4  16    2.83    2.33
   4  -4  16    3.21    4.10
  -4  -4 -16    0.30    2.61
  -4   4 -17   22.07    5.08
   4   4  17   23.88    4.47
   4  -4  17   20.05    5.08
  -4  -4 -17   23.47    5.07
   4   4  18   16.82    3.63
  -4   4 -18   19.45    6.30
  -4  -4 -18   12.52    3.67
   4  -4  18    6.96    6.34
   4   4  19    5.95    2.42
  -4   4 -19    3.49    2.64
  -4  -4 -19    5.58    3.89
   4  -4  19    3.68    2.68
   4   4  20    2.56    1.79
  -4   4 -20   -0.00    1.98
   4  -4  20    3.19    1.98
  -4  -4 -20    3.43    2.82
   4   4  21    7.74    1.98
  -4   4 -21    0.01    2.08
  -4  -4 -21    5.13    1.77
   4  -4  21    3.69    1.95
   4   6 -22    4.03    1.70
  -4   6  22    4.20    1.93
  -4  -6  22    3.35    1.64
   4  -6 -22    5.03    2.03
   4   6 -21    4.62    1.99
  -4   6  21    4.84    2.25
   4  -6 -21    7.51    2.45
  -4  -6  21    5.00    1.92
   4   6 -20    0.00    2.59
  -4   6  20   12.64    3.00
  -4  -6  20    8.36    2.45
   4  -6 -20   17.41    3.25
   4   6 -19    0.95    1.83
  -4   6  19    2.64    2.13
   4  -6 -19    5.37    3.79
  -4  -6  19    1.95    1.87
   4   6 -18    0.13    3.04
  -4   6  18    1.76    2.39
   4  -6 -18    3.64    2.38
  -4  -6  18    2.30    1.90
   4   6 -17   10.45    3.62
  -4   6  17   21.15    4.14
  -4   6  17   19.56    4.37
  -4  -6  17   11.26    5.66
   4   6 -16    2.16    1.81
  -4   6  16    1.45    3.38
  -4   6  16    0.59    1.98
  -4  -6  16    0.91    1.84
   4   6 -15    6.11    2.65
  -4   6  15    5.83    2.82
  -4   6  15    5.37    2.99
  -4  -6  15    4.26    2.60
   4   6 -14    0.66    1.88
  -4   6  14    3.46    2.01
  -4   6  14    1.28    2.06
  -4  -6  14    1.48    1.92
  -4   6  13   20.53    3.84
   4   6 -13   15.97    3.88
  -4   6  13   23.91    4.12
   4  -6 -13   16.53    3.27
   4  -6 -13   15.82    5.03
  -4  -6  13   19.76    3.79
  -4   6  12    0.10    1.73
   4   6 -12    1.26    2.79
  -4   6  12    0.95    1.83
  -4  -6  12    1.97    1.67
   4  -6 -12    2.64    2.40
   4  -6 -12    1.58    2.27
   4   6 -11   59.47    6.48
  -4   6  11   69.29    6.47
  -4   6  11   63.03    6.38
   4  -6 -11   62.43    6.01
   4  -6 -11   65.71    8.81
  -4  -6  11   63.08    6.49
  -4  -6  11   52.45    5.56
  -4   6  10    3.61    1.94
   4   6 -10    2.87    2.09
  -4   6  10    3.63    2.05
  -4  -6  10    2.91    3.00
   4  -6 -10    3.46    1.83
  -4  -6  10    3.56    1.71
   4  -6 -10    2.58    1.89
  -4   6   9   18.15    3.12
  -4   6   9   15.57    4.96
   4   6  -9   17.11    3.21
   4  -6  -9   11.49    4.75
  -4  -6   9   15.21    2.89
   4  -6  -9   17.99    3.42
  -4  -6   9   16.78    2.83
  -4   6   8  136.10    9.58
   4   6  -8  128.18    9.49
  -4   6   8  130.05    8.80
  -4  -6   8  128.99    8.61
   4  -6  -8  136.26   10.37
  -4  -6   8  117.17    8.68
   4  -6  -8  127.23    9.38
   4   6  -7   86.69    7.08
   4   6  -7   93.29    7.44
  -4   6   7   99.65    6.88
  -4   6   7   91.41    7.25
  -4   6   7   90.68    8.89
   4  -6  -7   90.03    7.25
  -4  -6   7   85.60    6.79
  -4  -6   7   84.96    6.10
   4   6  -6    1.79    1.25
  -4   6   6    2.52    1.97
   4   6  -6    1.22    1.43
   4   6  -6    2.53    1.59
  -4   6   6    2.87    1.52
  -4   6   6    1.76    1.30
   4  -6  -6    0.58    1.38
  -4  -6   6    1.20    1.39
   4  -6  -6    2.39    1.55
  -4  -6   6    0.55    1.06
   4   6  -5   51.85    4.63
  -4   6   5   49.11    4.92
  -4   6   5   53.98    4.29
   4   6  -5   54.50    4.35
   4   6  -5   53.43    5.55
  -4   6   5   52.64    6.31
   4  -6  -5   43.74    4.39
   4  -6  -5   47.67    5.15
  -4  -6   5   47.24    4.87
  -4  -6   5   51.79    3.75
   4   6  -4   27.25    3.00
  -4   6   4   35.66    3.09
   4   6  -4   32.67    4.46
  -4   6   4   31.85    4.92
   4   6  -4   29.56    3.52
  -4   6   4   28.96    3.78
   4  -6  -4   27.75    3.04
  -4  -6   4   30.90    3.84
   4  -6  -4   29.05    4.11
  -4  -6   4   29.52    2.59
   4   6  -3   14.73    3.47
   4   6  -3   15.18    2.22
  -4   6   3   12.68    2.83
   4   6  -3   20.40    2.63
  -4   6   3   20.48    3.68
   4  -6  -3   13.92    4.71
  -4  -6   3   12.63    1.75
  -4   6   2  108.98    9.67
   4   6  -2  105.45    7.17
  -4   6   2  104.73    7.70
   4  -6  -2  103.95    7.95
  -4  -6   2  105.54    8.45
  -4  -6   2  109.79    8.02
   4   6  -1    3.01    1.53
  -4   6   1    1.92    2.29
  -4  -6   1    4.33    1.81
   4  -6  -1    3.61    1.80
  -4  -6   1    2.12    2.03
   4   6   0    4.97    1.72
  -4   6   0    4.61    2.54
  -4  -6   0    3.79    2.00
  -4  -6   0    5.57    2.27
   4   6   1    2.56    1.64
  -4   6  -1    3.99    2.34
  -4   6  -1    4.46    1.84
   4  -6   1    4.60    1.82
  -4  -6  -1    3.14    2.10
   4   6   2  141.24   11.06
  -4   6  -2  116.35   10.10
  -4   6  -2  135.62    9.31
   4  -6   2  118.69    8.42
  -4  -6  -2  127.13   10.02
  -4  -6  -2  109.82    7.87
  -4  -6  -2  128.57   11.15
   4   6   3  255.16   18.71
   4   6   3  270.74   14.38
  -4   6  -3  270.60   21.03
  -4   6  -3  275.44   18.42
   4  -6   3  241.57   14.98
  -4  -6  -3  247.02   16.20
  -4  -6  -3  275.15   21.85
  -4   6  -4   92.28    8.06
   4   6   4   98.05    6.34
   4   6   4   90.99    6.94
  -4   6  -4   96.89    5.59
  -4   6  -4   98.10    8.60
   4  -6   4   93.35    6.47
  -4  -6  -4  102.98    8.09
   4  -6   4   82.60    6.58
  -4  -6  -4  103.47   10.48
   4   6   5   27.42    3.50
  -4   6  -5   26.83    4.52
   4   6   5   28.79    3.60
   4  -6   5   28.66    3.56
  -4  -6  -5   58.63    6.44
   4  -6   5   23.88    3.34
  -4  -6  -5   26.16    4.28
  -4   6  -6   31.10    5.03
   4   6   6   37.04    4.19
   4   6   6   35.28    3.93
  -4   6  -6   34.38    4.98
   4  -6   6   30.64    3.62
   4  -6   6   33.16    4.14
  -4  -6  -6   30.98    3.83
  -4  -6  -6   32.51    4.57
   4   6   7   15.68    2.84
   4   6   7   12.57    2.94
  -4   6  -7   10.04    3.41
  -4   6  -7   12.33    3.60
   4  -6   7   16.80    2.99
  -4  -6  -7   12.18    2.63
  -4  -6  -7   10.93    3.04
   4   6   8  610.44   37.99
   4   6   8  641.43   39.09
  -4   6  -8  485.89   44.26
  -4  -6  -8  545.42   42.07
   4  -6   8  554.85   37.65
  -4  -6  -8  603.07   38.05
   4   6   9   38.14    4.94
  -4   6  -9   33.47    5.67
  -4  -6  -9   35.51    7.21
   4  -6   9   37.23    5.08
  -4  -6  -9   33.09    5.74
  -4   6 -10    1.76    2.12
   4   6  10    1.64    1.90
   4  -6  10    2.76    1.86
  -4  -6 -10   -1.79    2.19
  -4  -6 -10    2.73    1.65
   4   6  11   -0.09    2.24
  -4   6 -11    0.80    1.59
  -4  -6 -11   -0.41    1.68
   4  -6  11   -0.28    1.41
  -4  -6 -11    0.78    1.20
   4   6  12   24.28    4.50
  -4   6 -12   26.35    4.87
   4  -6  12   22.70    4.32
  -4  -6 -12   18.27    3.99
  -4  -6 -12   21.59    4.97
   4   6  13    3.27    2.17
  -4   6 -13    2.35    2.18
   4  -6  13    1.56    2.06
  -4  -6 -13    0.78    2.40
   4   6  14  122.52   10.53
  -4   6 -14   99.95   10.22
   4  -6  14   97.94    9.63
  -4  -6 -14  105.39   16.09
   4   6  15   17.85    4.04
  -4   6 -15   16.38    4.20
   4  -6  15   15.68    3.92
  -4  -6 -15   16.97    4.35
   4   6  16   21.32    3.84
  -4   6 -16   20.17    4.12
   4  -6  16   13.77    3.70
  -4  -6 -16   21.73    4.23
   4   6  17    8.07    2.54
  -4   6 -17    0.00    2.77
  -4  -6 -17    8.90    2.74
   4  -6  17    9.97    2.53
   4   6  18    0.46    1.15
  -4   6 -18   -0.03    2.02
  -4  -6 -18    1.40    1.23
   4  -6  18   -0.74    1.10
  -4   6 -19    4.93    1.99
  -4  -6 -19    3.15    1.90
   4   8 -18   92.58    6.74
  -4   8  18  123.68   11.71
   4  -8 -18  104.31    7.66
   4   8 -17   28.18    3.54
  -4   8  17   44.36    7.27
   4  -8 -17   33.96    4.32
  -4  -8  17   30.35    2.98
   4   8 -16    6.19    2.12
  -4   8  16    5.24    4.65
   4  -8 -16    9.75    2.61
  -4  -8  16    8.28    2.74
  -4   8  15   13.45    5.90
   4   8 -15    4.87    4.36
   4  -8 -15   17.92    3.20
  -4  -8  15   13.15    2.27
   4   8 -14    2.84    2.85
  -4   8  14    2.18    2.28
   4  -8 -14    1.19    2.15
  -4  -8  14    3.21    1.45
   4  -8 -14    3.71    1.59
  -4   8  13    3.66    2.52
   4   8 -13    3.77    3.28
   4  -8 -13    4.43    1.94
   4  -8 -13    5.73    2.41
  -4  -8  13    3.20    1.68
   4  -8 -13    5.34    1.87
  -4   8  12   10.71    2.98
   4   8 -12    6.76    4.00
   4  -8 -12    7.74    2.37
   4  -8 -12    5.76    2.97
  -4  -8  12    8.90    2.11
   4  -8 -12    9.50    2.51
  -4   8  11   30.43    4.49
   4   8 -11   23.01    3.88
   4  -8 -11   20.63    4.41
   4  -8 -11   25.59    4.00
   4  -8 -11   22.75    3.71
  -4  -8  11   14.82    5.96
   4   8 -10    5.53    2.39
  -4   8  10    6.81    4.12
   4  -8 -10    8.40    4.24
   4  -8 -10    7.40    2.45
  -4  -8  10    3.53    3.76
   4   8  -9   53.56    5.81
  -4   8   9   54.65    6.17
   4  -8  -9   52.95    8.99
  -4  -8   9   47.37    5.95
   4  -8  -9   60.57    6.43
  -4   8   8   48.54    5.98
   4   8  -8   46.69    8.11
   4  -8  -8   49.72    6.19
  -4  -8   8   44.02    5.48
   4  -8  -8   43.80    5.70
  -4  -8   8   39.40    5.49
  -4   8   7  228.49   15.72
   4   8  -7  197.06   14.42
   4  -8  -7  214.68   21.88
  -4  -8   7  183.36   14.26
   4  -8  -7  205.54   15.59
  -4  -8   7  177.99   14.55
   4   8  -6  881.42   60.27
  -4   8   6  958.60   65.96
   4  -8  -6  887.66   64.31
   4  -8  -6  913.88   66.68
  -4  -8   6  838.21   60.74
  -4  -8   6  902.23   63.72
  -4   8   5  616.82   41.68
   4   8  -5  610.71   40.14
   4  -8  -5  560.50   41.44
  -4  -8   5  551.40   38.86
  -4  -8   5  600.70   42.35
   4  -8  -5  593.92   41.81
  -4   8   4    8.17    2.99
   4   8  -4    5.79    2.86
   4  -8  -4    8.89    3.04
  -4  -8   4    6.71    3.04
  -4  -8   4    7.15    2.97
   4  -8  -4   11.40    3.65
   4   8  -3    0.24    1.27
   4  -8  -3   -1.18    1.78
   4  -8  -3    0.34    2.44
  -4  -8   3   -0.53    1.52
  -4  -8   3   -0.59    2.40
   4  -8  -2   23.36    4.99
   4  -8  -2   25.90    5.37
  -4  -8   2   25.38    4.96
  -4  -8   2   24.78    4.83
  -4   8   1   43.45    7.47
  -4   8   1   37.76    5.46
   4  -8  -1   39.31    5.66
  -4  -8   1   35.16    5.79
  -4  -8   1   40.20    5.93
   4   8   0  303.80   19.73
  -4   8   0  301.19   23.71
   4  -8   0  249.25   19.32
  -4  -8   0  263.56   20.25
  -4  -8   0  274.33   20.65
   4   8   1   63.13    9.61
  -4   8  -1   42.25    7.64
   4  -8   1   79.30    7.50
  -4  -8  -1   42.29   10.58
  -4  -8  -1   32.36    6.66
   4   8   2  219.09   14.83
  -4   8  -2  215.61   17.54
  -4   8  -2  190.27   14.90
   4  -8   2  177.95   15.03
  -4  -8  -2  198.83   15.84
  -4  -8  -2  224.67   16.85
  -4   8  -3  185.48   15.83
   4   8   3  171.84   12.76
  -4   8  -3  188.93   14.19
  -4  -8  -3  197.66   15.20
   4  -8   3  160.44   13.24
  -4  -8  -3  177.09   14.13
   4   8   4  160.58   11.34
  -4   8  -4  138.05   11.68
  -4   8  -4  156.40   13.44
   4  -8   4  122.94   10.95
  -4  -8  -4  146.50   11.91
  -4  -8  -4  162.28   12.95
  -4   8  -5  108.81   10.25
   4   8   5  128.90   12.85
  -4   8  -5  122.15   11.26
  -4  -8  -5  130.71   10.90
   4  -8   5   96.05    9.58
  -4  -8  -5  121.43   10.20
   4   8   6  114.79    8.83
  -4   8  -6  107.78    9.65
   4  -8   6   83.35    8.90
  -4  -8  -6  107.40    9.39
  -4  -8  -6  123.62    9.99
  -4   8  -7   47.95    9.38
   4   8   7   55.04    5.86
   4  -8   7   42.44    5.96
  -4  -8  -7   54.56    6.13
  -4  -8  -7   43.86    8.25
   4   8   8   48.77    5.39
  -4   8  -8   39.73    5.57
  -4  -8  -8   41.29    5.45
  -4  -8  -8   37.24    5.24
   4   8   9   12.51    3.03
  -4   8  -9    9.65    3.08
  -4  -8  -9   12.55    3.03
  -4  -8  -9    7.63    2.85
   4   8  10    1.63    2.21
  -4   8 -10   -1.23    1.38
  -4  -8 -10    0.16    1.19
  -4  -8 -10    3.02    2.16
   4   8  11   12.68    3.37
  -4   8 -11   11.20    3.27
  -4  -8 -11   14.35    4.77
  -4  -8 -11   13.83    2.96
   4   8  12   30.10    4.55
  -4   8 -12   24.01    4.17
  -4  -8 -12   24.37    5.31
  -4  -8 -12   26.43    5.99
   4   8  13    4.82    2.14
  -4   8 -13    3.62    1.98
   4  -8  13    2.17    1.04
  -4  -8 -13    5.47    1.82
  -4  -8 -13    4.32    1.28
   4   8  14    0.35    1.03
  -4   8 -14   -0.53    1.62
  -4  -8 -14    0.05    1.43
   4   8  15    6.20    2.12
  -4   8 -15    8.70    2.11
  -4  -8 -15    5.34    1.90
  -4  10  11    2.03    1.73
   4 -10 -11    2.95    2.09
   4  10 -10   29.09    3.34
  -4  10  10   36.21    4.06
   4 -10 -10   27.54    3.73
   4 -10 -10   38.33    3.85
  -4  10   9   63.55    5.38
   4  10  -9   51.31    4.27
   4 -10  -9   70.52    5.34
  -4 -10   9   34.55    4.52
   4 -10  -9   49.49    7.48
   4  10  -8    0.34    1.58
  -4  10   8    6.94    3.11
   4 -10  -8    6.16    1.92
  -4 -10   8    3.25    1.75
   4 -10  -8    5.69    1.97
   4  10  -7   -0.17    1.61
  -4  10   7    6.27    1.89
   4 -10  -7    3.98    2.07
   4 -10  -7    4.87    2.08
  -4 -10   7    3.35    1.87
  -4 -10   7    3.94    1.42
   4  10  -6   28.98    3.39
  -4  10   6   28.80    3.89
   4 -10  -6   25.10    4.39
   4 -10  -6   32.52    4.42
  -4 -10   6   24.78    5.19
  -4 -10   6   18.92    6.35
   4  10  -5    0.03    1.52
  -4  10   5    2.28    2.85
   4 -10  -5    4.44    1.98
  -4 -10   5    2.24    1.60
   4 -10  -5    1.44    1.94
  -4 -10   5    3.08    1.80
   4  10  -4   47.52    4.98
  -4  10   4   53.20    5.65
   4 -10  -4   54.30    6.20
  -4 -10   4   42.94    5.68
   4 -10  -4   51.53    6.21
  -4 -10   4   55.22    5.39
   4 -10  -3   16.96    3.99
   4 -10  -3   23.33    4.07
  -4 -10   3   22.86    3.63
  -4 -10   3   14.68    3.80
   4 -10  -2   37.96    5.22
   4 -10  -2   32.44    5.05
  -4 -10   2   33.94    5.04
  -4 -10   2   42.22    4.94
   4 -10  -1   31.75    4.78
   4 -10  -1   28.01    4.74
  -4 -10   1   31.35    4.86
  -4 -10   1   35.29    4.81
   4 -10   0   10.92    2.98
   4 -10   0   12.78    3.39
  -4 -10   0   12.35    3.34
  -4 -10   0   15.66    3.24
  -4  10  -1   13.23    3.00
   4  10   1    9.41    2.46
   4 -10   1   11.31    3.03
  -4 -10  -1   11.75    3.07
  -4 -10  -1   14.21    3.08
   4 -10   1    6.27    2.93
  -4  10  -2   27.35    3.83
   4  10   2   23.15    3.19
   4 -10   2   15.54    5.80
  -4 -10  -2   24.28    6.63
   4 -10   2   27.29    3.91
  -4 -10  -2   23.26    4.04
  -4  10  -3   17.49    3.01
   4  10   3   14.56    2.59
   4 -10   3    2.82    2.77
  -4 -10  -3   17.89    3.11
  -4 -10  -3   18.08    3.35
   4 -10   3   15.61    2.87
   4  10   4   61.60    7.55
  -4  10  -4   63.62    5.71
   4 -10   4   60.30    5.47
   4 -10   4   45.73    5.22
  -4 -10  -4   71.99    6.47
  -4 -10  -4   59.17    5.79
   4  10   5    4.55    1.52
  -4  10  -5    0.08    1.73
   4 -10   5    3.77    1.34
   4 -10   5    1.05    1.37
  -4 -10  -5    1.66    1.58
  -4 -10  -5    6.53    1.94
   4  10   6   42.24    3.91
  -4  10  -6   36.38    4.21
  -4 -10  -6   32.95    3.90
  -4 -10  -6   40.15    4.46
   4  10   7    4.29    1.66
  -4  10  -7    0.05    1.64
  -4 -10  -7    3.20    1.10
  -4 -10  -7    5.71    1.84
  -5   1  26    6.61    2.22
  -5  -1  26    7.83    2.25
  -5   1  25   31.94    3.80
  -5  -1  25   16.38    2.74
  -5  -1  25   30.72    4.06
  -5   1  24   52.89    5.72
  -5  -1  24   53.30    5.62
  -5  -1  24   31.32    4.75
  -5   1  23    4.39    2.49
  -5  -1  23    6.96    3.89
  -5  -1  23    3.74    2.34
  -5   1  22   25.13    4.62
  -5  -1  22   26.79    4.52
  -5  -1  22   21.53    4.60
  -5   1  21   60.21    7.24
  -5  -1  21   62.01    7.10
  -5  -1  21   55.46   10.68
  -5   1  20  588.24   39.16
  -5  -1  20  564.06   38.11
   5  -1 -20  543.10   40.09
  -5  -1  20  544.57   39.82
  -5   1  19   77.23    6.92
  -5   1  19   74.41    7.65
  -5  -1  19   74.99    7.51
  -5  -1  19   70.99    8.12
  -5   1  18    1.17    1.44
  -5   1  18    2.06    1.68
  -5  -1  18   -0.58    1.79
  -5  -1  18    1.50    1.66
  -5   1  17  171.71   13.44
  -5   1  17  159.43   11.05
  -5   1  17  137.79   10.58
  -5  -1  17  149.16   16.14
  -5  -1  17  141.69   10.68
  -5   1  16   50.02    5.29
  -5   1  16   41.97    4.75
  -5   1  16   55.27    4.69
   5  -1 -16   52.44    4.75
  -5  -1  16   54.13    5.57
  -5  -1  16   49.69    5.08
   5   1 -15   29.02    2.75
   5   1 -15   25.40    3.05
  -5   1  15   18.37    2.85
  -5   1  15   25.31    5.52
  -5   1  15   21.24    2.96
   5  -1 -15   18.72    2.93
   5  -1 -15   18.81    1.98
  -5  -1  15   24.46    4.85
  -5  -1  15   21.82    3.62
   5   1 -14   52.62    3.63
  -5   1  14   61.37    4.52
   5   1 -14   51.13    6.26
   5   1 -14   52.62    4.00
  -5   1  14   56.62    4.38
  -5   1  14   58.87    5.32
   5  -1 -14   53.97    3.08
   5  -1 -14   58.48    6.92
  -5  -1  14   53.83    4.73
   5  -1 -14   51.62    4.40
  -5  -1  14   55.17    3.27
  -5  -1  14   57.63    5.29
  -5   1  13   20.23    2.15
   5   1 -13   18.20    1.93
   5   1 -13   24.79    2.50
  -5   1  13   20.00    3.09
   5   1 -13   21.96    2.38
  -5   1  13   22.34    2.39
  -5   1  13   20.85    2.66
  -5  -1  13   21.38    1.70
   5  -1 -13   18.49    2.38
  -5  -1  13   18.06    2.72
   5  -1 -13   18.57    1.32
   5  -1 -13   22.47    2.82
  -5  -1  13   23.10    3.18
   5  -1 -13   20.81    3.82
   5   1 -12  131.15    4.83
  -5   1  12  131.16    8.10
   5   1 -12  120.23    6.78
  -5   1  12  135.80    5.36
  -5   1  12  135.82    7.73
  -5   1  12  130.92    6.80
   5   1 -12  110.37    6.78
   5   1 -12  120.77    5.90
   5  -1 -12  134.23    5.56
  -5  -1  12  118.13    7.27
   5  -1 -12  123.05    7.78
  -5  -1  12  128.60    5.55
   5  -1 -12  125.95    6.99
  -5  -1  12  121.25    4.70
  -5  -1  12  126.19    8.37
   5  -1 -12  135.47    5.14
   5   1 -11  166.20    8.00
  -5   1  11  157.59    8.86
  -5   1  11  148.05    7.33
   5   1 -11  158.92    5.71
   5   1 -11  141.27    7.48
  -5   1  11  147.48   11.15
   5   1 -11  148.74    6.59
  -5   1  11  149.49    7.25
   5  -1 -11  148.79    5.95
   5  -1 -11  139.14    6.87
   5  -1 -11  150.84    7.72
  -5  -1  11  162.20    6.49
   5  -1 -11  148.87    5.35
  -5  -1  11  131.06    7.61
  -5  -1  11  162.55    5.99
  -5  -1  11  153.63    9.11
   5  -1 -11  150.40    8.80
   5  -1 -11  151.29    4.58
   5   1 -10  193.27    6.82
   5   1 -10  191.53    8.98
  -5   1  10  178.09    9.67
  -5   1  10  178.38    9.05
   5   1 -10  157.32    7.83
  -5   1  10  177.12    8.24
  -5   1  10  181.51    9.02
   5   1 -10  183.32    7.30
   5  -1 -10  176.86    6.56
   5  -1 -10  155.73    6.22
   5  -1 -10  168.97    8.07
  -5  -1  10  164.05    8.15
   5  -1 -10  166.79    6.31
  -5  -1  10  181.26    9.63
   5  -1 -10  174.41    5.33
   5  -1 -10  173.14   12.04
  -5  -1  10  191.29    7.11
  -5  -1  10  193.34    8.15
   5   1  -9  180.54    6.90
   5   1  -9  188.16    8.57
   5   1  -9  156.81    7.29
   5   1  -9  192.75    7.73
  -5   1   9  191.27    7.01
  -5   1   9  185.12    8.30
  -5   1   9  186.05    8.94
   5  -1  -9  185.44    5.62
   5  -1  -9  181.83    6.68
  -5  -1   9  192.38    9.41
  -5  -1   9  190.91    7.12
   5  -1  -9  171.34    7.65
   5  -1  -9  187.35    6.44
   5  -1  -9  190.83    6.30
  -5  -1   9  185.82    6.72
  -5  -1   9  164.49    7.61
   5   1  -8   55.30    2.23
  -5   1   8   63.99    2.57
   5   1  -8   58.44    3.16
  -5   1   8   63.67    2.57
  -5   1   8   62.14    3.14
  -5   1   8   65.36    3.73
   5   1  -8   55.85    3.45
   5  -1  -8   62.60    2.07
   5  -1  -8   62.21    2.47
   5  -1  -8   53.33    2.26
   5  -1  -8   62.26    2.15
   5  -1  -8   58.33    3.68
   5  -1  -8   59.19    4.16
  -5  -1   8   54.06    2.44
  -5  -1   8   50.31    2.86
  -5  -1   8   57.71    3.02
  -5  -1   8   55.32    3.70
   5   1  -7   42.76    2.91
   5   1  -7   32.48    3.00
  -5   1   7   42.21    2.08
  -5   1   7   35.47    4.54
  -5   1   7   37.11    1.75
  -5   1   7   38.03    2.33
   5   1  -7   43.91    2.48
  -5   1   7   37.89    2.48
   5  -1  -7   35.64    2.22
   5  -1  -7   40.64    1.75
  -5  -1   7   42.05    0.69
   5  -1  -7   40.30    1.44
   5  -1  -7   34.15    1.75
  -5  -1   7   41.45    2.41
  -5  -1   7   43.05    1.73
   5  -1  -7   39.35    3.02
  -5  -1   7   39.84    2.11
  -5  -1   7   43.41    3.05
   5   1  -6  229.75    7.67
  -5   1   6  219.61   11.18
   5   1  -6  217.47   10.91
  -5   1   6  229.77   11.49
  -5   1   6  216.62    9.06
   5   1  -6  202.02   10.14
  -5   1   6  220.93    9.14
  -5   1   6  225.65   10.88
   5  -1  -6  221.59    8.63
  -5  -1   6  225.43    7.31
  -5  -1   6  202.64    8.74
   5  -1  -6  229.58    7.17
   5  -1  -6  229.95   11.39
  -5  -1   6  216.67   10.85
   5  -1  -6  206.98    8.22
   5  -1  -6  237.36    9.36
  -5  -1   6  216.10    7.67
  -5  -1   6  210.88    6.40
   5   1  -5 1273.29   72.83
   5   1  -5 1113.02   59.38
   5   1  -5 1371.62   66.18
  -5   1   5 1265.22   68.35
  -5   1   5 1348.31   64.43
  -5   1   5 1297.14   74.67
  -5   1   5 1288.01   68.67
  -5   1   5 1292.28   68.25
   5  -1  -5 1187.44   69.33
   5  -1  -5 1335.84   64.97
   5  -1  -5 1232.27   65.67
  -5  -1   5 1301.32   80.70
  -5  -1   5 1272.87   70.98
  -5  -1   5 1331.39   63.61
  -5  -1   5 1338.77   66.39
  -5  -1   5 1186.04   64.09
   5  -1  -5 1277.94   67.37
   5  -1  -5 1319.37   75.94
  -5  -1   5 1318.61   68.61
   5   1  -4 3480.28  238.14
  -5   1   4 3322.10  236.30
   5   1  -4 3536.44  260.55
  -5   1   4 3221.24  238.65
  -5   1   4 3150.46  209.06
  -5   1   4 3669.00  272.00
  -5   1   4 3561.85  259.85
   5   1  -4 3342.77  241.61
   5  -1  -4 3207.21  229.24
  -5  -1   4 3254.84  226.93
  -5  -1   4 3840.19  279.14
  -5  -1   4 3257.65  228.89
  -5  -1   4 3666.25  252.97
  -5  -1   4 3295.50  238.50
   5  -1  -4 3335.25  222.80
   5  -1  -4 3469.46  257.12
   5  -1  -4 3127.12  226.61
   5  -1  -4 3843.02  289.89
  -5  -1   4 3484.75  247.12
   5   1  -3   15.76    1.44
   5   1  -3   18.20    0.92
   5   1  -3   14.40    0.81
   5   1  -3   12.22    1.26
  -5   1   3   14.39    1.46
  -5   1   3   16.33    1.23
  -5   1   3   14.83    1.54
  -5   1   3   15.86    1.50
   5  -1  -3   15.79    0.42
   5  -1  -3   15.52    1.09
  -5  -1   3   14.55    1.18
   5  -1  -3   14.93    1.23
  -5  -1   3   13.06    0.98
  -5  -1   3   14.86    1.27
  -5  -1   3   13.89    1.94
   5  -1  -3   17.55    0.57
   5  -1  -3   13.58    1.38
   5  -1  -3   16.27    1.50
  -5  -1   3   14.06    1.19
  -5   1   2   39.26    2.72
   5   1  -2   41.97    1.95
   5   1  -2   40.43    1.72
   5   1  -2   45.64    1.36
  -5   1   2   44.61    2.14
   5   1  -2   40.08    2.90
  -5   1   2   43.68    1.70
  -5   1   2   44.19    2.39
  -5   1   2   37.72    1.48
   5  -1  -2   50.16    1.94
   5  -1  -2   43.77    2.36
  -5  -1   2   47.42    1.49
   5  -1  -2   45.85    2.04
  -5  -1   2   41.92    1.80
  -5  -1   2   39.19    1.83
   5  -1  -2   39.89    1.86
  -5  -1   2   41.43    1.63
   5   1  -1 5214.46  441.49
   5   1  -1 5391.73  439.85
   5   1  -1 4856.67  414.62
  -5   1   1 5511.41  479.47
   5   1  -1 5543.14  465.71
  -5   1   1 5190.11  435.29
  -5   1   1 5152.99  433.01
  -5   1   1 5624.96  470.38
  -5   1   1 4599.67  378.79
  -5  -1   1 5473.93  447.74
   5  -1  -1 5740.26  495.30
   5  -1  -1 5132.98  427.41
  -5  -1   1 4938.08  417.94
  -5  -1   1 5195.04  438.66
  -5  -1   1 5392.90  450.39
  -5  -1   1 4516.04  381.02
  -5  -1   1 5318.56  441.58
   5  -1  -1 5313.80  443.61
   5  -1  -1 5889.65  483.69
   5   1   0 3171.73  221.36
   5   1   0 2992.35  209.96
  -5   1   0 3148.15  224.12
   5   1   0 3064.77  216.18
  -5   1   0 3302.39  231.57
  -5   1   0 3493.40  240.30
   5   1   0 3456.67  246.68
   5   1   0 3059.02  211.29
  -5   1   0 3557.15  262.61
   5  -1   0 3671.21  253.53
   5  -1   0 3295.10  229.27
  -5  -1   0 3070.93  212.06
  -5  -1   0 3139.78  224.10
   5  -1   0 3475.32  237.08
  -5  -1   0 3116.30  217.29
  -5  -1   0 3414.97  245.17
  -5  -1   0 2965.28  212.10
   5  -1   0 3337.69  238.64
   5   1   1   20.68    2.68
   5   1   1   18.55    3.18
  -5   1  -1   13.03    1.96
   5   1   1   22.62    1.71
  -5   1  -1   16.40    2.10
   5   1   1   19.85    1.85
  -5   1  -1   15.97    2.52
   5   1   1   21.52    2.56
  -5   1  -1   16.79    1.69
   5   1   1   18.33    2.45
   5  -1   1   17.93    1.18
   5  -1   1   17.21    2.19
  -5  -1  -1   21.35    1.54
   5  -1   1   15.64    2.14
  -5  -1  -1   17.05    2.23
   5  -1   1   16.82    3.42
  -5  -1  -1   19.37    1.69
  -5  -1  -1   16.14    2.46
   5  -1   1   17.41    2.32
  -5   1  -212032.36 1390.20
  -5   1  -2 9263.16 1076.35
  -5   1  -212153.16 1435.22
   5   1   212009.73 1361.11
   5   1   211494.84 1330.41
   5   1   2 9933.53 1175.99
   5   1   211279.74 1322.72
   5   1   2 9973.01 1157.16
  -5   1  -210229.02 1200.16
   5  -1   211094.43 1297.44
   5  -1   211584.17 1302.71
   5  -1   212432.99 1387.55
   5  -1   2 9786.46 1152.88
   5  -1   211933.92 1386.06
  -5  -1  -210893.84 1284.69
  -5  -1  -212668.06 1436.45
  -5  -1  -210688.12 1242.09
  -5  -1  -210288.77 1195.61
  -5  -1  -211404.06 1328.66
   5   1   3 1649.38   98.45
  -5   1  -3 1884.54  110.33
   5   1   3 1636.78   98.58
   5   1   3 1782.62  108.01
  -5   1  -3 1817.10  110.26
   5   1   3 1373.39   84.12
  -5   1  -3 1721.61   97.38
  -5   1  -3 1835.67  105.18
   5  -1   3 1766.16  101.95
   5  -1   3 1815.72  107.57
  -5  -1  -3 1568.20   95.71
   5  -1   3 1598.83   82.61
  -5  -1  -3 1467.71   87.22
   5  -1   3 1773.36   90.93
  -5  -1  -3 1816.38   95.69
  -5  -1  -3 1723.44  103.21
  -5  -1  -3 1601.36   92.57
   5  -1   3 1538.56   91.88
   5   1   4  201.00    8.86
  -5   1  -4  247.93   11.16
   5   1   4  206.65    8.56
  -5   1  -4  194.87    9.95
  -5   1  -4  212.56    7.90
   5   1   4  192.27    8.25
  -5   1  -4  223.68    9.57
  -5  -1  -4  225.32    6.41
   5  -1   4  193.41    8.60
  -5  -1  -4  191.21    9.18
   5  -1   4  220.55   11.83
  -5  -1  -4  181.89    7.72
   5  -1   4  222.14    9.89
  -5  -1  -4  200.53    8.08
   5   1   5  386.80   17.61
   5   1   5  341.64   15.41
   5   1   5  319.75   14.56
  -5   1  -5  424.24   18.12
  -5   1  -5  401.09   17.23
   5   1   5  365.77   17.07
  -5   1  -5  416.31   18.84
  -5   1  -5  402.13   16.33
   5  -1   5  389.86   18.45
   5  -1   5  414.50   17.05
   5  -1   5  388.65   17.81
  -5  -1  -5  407.66   17.37
  -5  -1  -5  366.25   15.77
  -5  -1  -5  390.33   12.84
  -5  -1  -5  353.55   17.61
  -5  -1  -5  348.26   16.01
  -5   1  -6   51.69    3.29
  -5   1  -6   43.87    2.60
   5   1   6   47.31    3.46
   5   1   6   48.10    3.55
  -5   1  -6   50.23    3.42
   5   1   6   43.06    2.84
  -5   1  -6   41.00    3.83
   5  -1   6   45.39    3.41
  -5  -1  -6   48.47    3.12
  -5  -1  -6   45.34    2.77
  -5  -1  -6   46.52    2.73
   5  -1   6   38.63    2.27
   5  -1   6   46.86    3.81
   5   1   7  412.13   20.40
  -5   1  -7  433.51   22.86
  -5   1  -7  453.18   21.92
   5   1   7  455.21   23.14
   5   1   7  452.66   26.81
  -5   1  -7  456.67   26.31
  -5   1  -7  411.58   21.55
   5  -1   7  438.45   22.27
  -5  -1  -7  404.03   19.25
   5  -1   7  409.81   22.49
   5  -1   7  416.84   19.97
  -5  -1  -7  394.15   20.07
  -5  -1  -7  433.16   19.59
   5   1   8  259.26   13.77
  -5   1  -8  283.93   14.65
  -5   1  -8  300.88   14.24
   5   1   8  305.07   15.98
   5   1   8  297.80   15.23
  -5   1  -8  264.36   12.14
  -5   1  -8  267.86   15.15
   5  -1   8  285.29   15.94
  -5  -1  -8  254.77   11.68
  -5  -1  -8  267.11   13.58
   5  -1   8  246.88   10.58
  -5  -1  -8  268.06   12.73
   5  -1   8  295.69   15.28
   5   1   9  642.02   35.40
  -5   1  -9  548.45   28.40
   5   1   9  645.91   34.70
   5   1   9  543.74   31.07
  -5   1  -9  618.56   33.44
  -5   1  -9  607.17   31.48
  -5   1  -9  552.03   28.14
   5  -1   9  558.71   26.26
   5  -1   9  571.20   32.30
   5  -1   9  588.86   34.76
  -5  -1  -9  561.55   27.70
  -5  -1  -9  604.25   30.55
  -5  -1  -9  613.32   36.31
   5   1  10  673.59   40.99
   5   1  10  748.24   48.85
  -5   1 -10  657.19   36.99
  -5   1 -10  685.37   37.00
  -5   1 -10  747.27   46.51
   5  -1  10  683.51   42.98
   5  -1  10  690.31   40.10
  -5  -1 -10  712.58   40.25
  -5  -1 -10  659.86   34.28
  -5  -1 -10  685.73   37.00
  -5  -1 -10  718.56   43.67
   5   1  11    0.32    1.25
   5   1  11    0.88    1.29
  -5   1 -11    0.53    0.87
  -5   1 -11    0.56    1.24
  -5   1 -11    2.73    1.14
   5  -1  11    0.42    1.29
  -5  -1 -11    0.64    1.16
  -5  -1 -11    1.05    1.30
   5  -1  11    1.58    2.32
  -5  -1 -11    0.52    0.88
   5   1  12  227.53   16.06
  -5   1 -12  258.32   14.06
   5   1  12  284.26   16.98
   5  -1  12  255.41   18.39
  -5  -1 -12  287.88   21.73
   5  -1  12  274.89   16.64
   5   1  13    1.44    1.55
   5   1  13    1.43    1.62
   5  -1  13    1.33    1.61
   5  -1  13    1.74    1.89
  -5  -1 -13    0.68    1.57
   5   1  14    4.96    2.45
   5   1  14    3.39    2.46
   5  -1  14    5.90    2.86
   5  -1  14    6.30    2.48
  -5  -1 -14    4.08    2.29
   5   1  15   23.47    4.64
   5   1  15   32.22    6.98
   5  -1  15   21.53    5.07
   5  -1  15   31.39    6.97
  -5  -1 -15   21.91    4.27
   5   1  16   27.93    5.67
   5   1  16   44.19    5.82
   5  -1  16   50.15    5.92
   5  -1  16   43.54    9.61
  -5  -1 -16   34.44    4.93
   5   1  17   26.50    5.02
   5   1  17   36.09    5.26
   5  -1  17   31.00    5.81
   5  -1  17   37.79    5.40
  -5  -1 -17   24.67    4.27
   5   1  18   32.36    6.94
   5   1  18   18.93    6.92
   5  -1  18   25.15    4.46
   5  -1  18   20.16    4.86
  -5  -1 -18   18.71    5.51
   5   1  19   72.47    9.46
   5   1  19  136.08   10.04
   5  -1  19  100.62   10.89
   5  -1  19  130.89   14.78
   5   1  20   -0.31    1.52
   5  -1  20   -0.83    1.53
   5  -1  20   -0.34    1.59
   5   1  21   46.50    5.08
   5  -1  21   46.26    5.37
   5  -1  21   31.33    4.93
   5   1  22    7.18    2.36
   5  -1  22    9.31    2.40
   5  -1  22    4.35    2.01
   5   3 -25    0.00    1.62
   5  -3 -25    1.01    1.54
  -5  -3  25    5.65    2.03
   5   3 -24  120.28    9.81
  -5   3  24  136.55    9.36
   5  -3 -24  104.86    8.49
  -5  -3  24  105.75    8.49
   5   3 -23    2.69    2.08
  -5   3  23    4.62    2.05
   5  -3 -23    0.04    1.88
  -5  -3  23    2.20    1.93
  -5   3  22   41.23    5.58
   5  -3 -22   40.89    5.74
  -5  -3  22   35.90    5.97
  -5  -3  22   44.17    5.52
  -5   3  21   58.31   10.33
  -5  -3  21   48.27    7.12
   5  -3 -21   62.76    7.38
  -5  -3  21   55.63    9.61
  -5   3  20   52.96    6.65
  -5   3  20   53.13    6.37
  -5  -3  20   49.63    6.89
  -5  -3  20   44.57    6.27
  -5   3  19   76.97    7.88
  -5   3  19   72.86    7.75
  -5  -3  19   56.89    8.02
  -5  -3  19   67.05    7.30
  -5   3  18    7.78    3.16
  -5   3  18    5.12    2.89
  -5  -3  18    6.08    3.13
  -5  -3  18    5.14    4.16
  -5   3  17   42.57    5.46
  -5   3  17   44.31    6.00
  -5  -3  17   32.07    5.07
  -5  -3  17   36.64    6.17
  -5   3  16   22.66    6.15
  -5   3  16   15.40    3.66
  -5  -3  16   15.28    3.32
  -5  -3  16   16.03    4.04
  -5   3  15  188.28   13.18
  -5   3  15  184.49   16.90
  -5  -3  15  157.84   11.19
  -5  -3  15  165.97   13.13
  -5   3  14  265.54   16.48
  -5   3  14  254.38   16.08
  -5  -3  14  239.75   16.69
  -5  -3  14  229.16   14.61
  -5   3  13  469.73   28.13
  -5   3  13  489.47   28.29
   5   3 -13  518.62   28.59
   5  -3 -13  451.74   26.07
  -5  -3  13  459.25   29.14
  -5  -3  13  435.33   25.80
   5  -3 -13  472.39   30.49
   5  -3 -13  493.44   25.29
   5   3 -12   10.65    1.46
   5   3 -12   11.08    2.44
  -5   3  12   15.35    2.76
  -5   3  12   17.06    2.57
   5  -3 -12   16.45    1.76
   5  -3 -12   15.34    2.40
  -5  -3  12   13.91    2.39
   5  -3 -12   15.61    5.05
  -5  -3  12   14.02    1.69
   5  -3 -12   13.28    2.39
  -5  -3  12   12.08    2.97
   5   3 -11  638.71   35.42
   5   3 -11  614.59   30.40
  -5   3  11  595.28   34.65
  -5   3  11  630.05   34.44
   5  -3 -11  591.27   36.78
   5  -3 -11  634.88   35.42
   5  -3 -11  577.00   32.21
  -5  -3  11  598.62   35.87
  -5  -3  11  583.85   32.80
  -5  -3  11  620.14   31.73
   5  -3 -11  591.20   29.78
   5   3 -10   22.03    4.62
   5   3 -10   20.75    2.87
  -5   3  10   22.48    2.63
  -5   3  10   22.94    3.20
   5  -3 -10   24.15    3.60
   5  -3 -10   23.54    2.73
   5  -3 -10   27.17    2.24
  -5  -3  10   21.01    1.27
  -5  -3  10   20.28    2.90
   5  -3 -10   23.65    3.21
  -5  -3  10   19.86    4.27
  -5  -3  10   18.74    3.28
  -5   3   9    1.34    1.06
   5   3  -9    1.42    1.20
  -5   3   9    0.00    1.06
   5   3  -9    2.31    0.83
  -5   3   9    3.01    1.35
  -5  -3   9    1.47    1.13
   5  -3  -9    1.65    1.53
   5  -3  -9    1.27    0.97
  -5  -3   9   -0.16    1.36
   5  -3  -9    2.00    1.12
  -5  -3   9   -0.04    0.94
  -5  -3   9    1.99    0.84
  -5   3   8 1176.79   70.22
   5   3  -8 1219.50   68.83
   5   3  -8 1077.29   66.51
  -5   3   8 1159.49   71.13
  -5   3   8 1250.11   71.81
   5  -3  -8 1211.65   69.98
  -5  -3   8 1148.11   70.48
  -5  -3   8 1239.42   69.19
   5  -3  -8 1186.00   73.91
   5  -3  -8 1132.18   67.45
  -5  -3   8 1228.65   75.77
  -5  -3   8 1059.33   61.39
   5   3  -7  154.89    8.44
   5   3  -7  149.59    7.22
  -5   3   7  158.92   10.01
  -5   3   7  139.56    8.31
  -5   3   7  152.87   11.16
  -5   3   7  146.67    7.55
   5  -3  -7  146.12    7.63
   5  -3  -7  152.76    8.90
  -5  -3   7  146.20    8.18
  -5  -3   7  141.75    6.93
  -5  -3   7  151.13    7.49
  -5  -3   7  148.52    7.07
  -5   3   6   52.07    3.64
   5   3  -6   74.14    4.07
   5   3  -6   71.74    4.96
  -5   3   6   56.46    3.87
   5   3  -6   68.63    4.32
  -5   3   6   60.62    4.63
   5   3  -6   74.61    3.95
  -5   3   6   57.91    4.22
   5  -3  -6   58.97    4.38
  -5  -3   6   70.77    3.76
   5  -3  -6   55.39    4.44
  -5  -3   6   74.84    5.44
  -5  -3   6   73.00    4.17
   5  -3  -6   59.55    4.10
   5   3  -5   50.82    3.44
  -5   3   5   46.53    3.86
   5   3  -5   50.28    3.15
   5   3  -5   50.44    3.04
  -5   3   5   43.22    3.20
  -5   3   5   43.81    2.98
   5   3  -5   50.30    4.33
   5  -3  -5   39.87    4.21
   5  -3  -5   47.31    3.10
   5  -3  -5   44.88    3.17
   5  -3  -5   40.74    3.65
  -5  -3   5   49.06    3.07
   5  -3  -5   41.58    3.31
  -5  -3   5   49.00    3.02
  -5  -3   5   46.93    3.28
   5   3  -4  194.73    8.28
  -5   3   4  183.02    8.55
  -5   3   4  182.08    9.84
   5   3  -4  185.84    8.75
   5   3  -4  182.37    8.45
   5   3  -4  188.46    8.93
  -5   3   4  211.80    8.79
   5  -3  -4  204.12    9.21
   5  -3  -4  205.51   11.25
   5  -3  -4  201.61    9.19
   5  -3  -4  199.22    8.64
  -5  -3   4  176.16    4.99
   5  -3  -4  197.48   10.24
  -5  -3   4  201.19    9.75
  -5  -3   4  177.02    8.21
  -5  -3   4  180.75    4.83
  -5  -3   4  182.13    7.87
   5   3  -3 1210.12   66.40
   5   3  -3 1077.00   62.59
   5   3  -3 1198.13   69.22
  -5   3   3 1374.93   61.27
   5   3  -3 1206.13   68.12
  -5   3   3 1188.36   66.30
  -5   3   3 1244.79   74.76
  -5   3   3 1314.20   72.29
   5  -3  -3 1240.71   70.69
   5  -3  -3 1208.98   67.37
   5  -3  -3 1204.44   67.10
  -5  -3   3 1250.47   74.48
  -5  -3   3 1196.83   60.34
  -5  -3   3 1207.40   67.61
  -5  -3   3 1233.43   67.23
   5  -3  -3 1315.35   78.03
  -5  -3   3 1109.37   55.77
   5  -3  -3 1328.14   73.69
   5   3  -2 2196.59  148.95
  -5   3   2 2153.54  158.12
   5   3  -2 2241.63  148.26
  -5   3   2 2127.02  140.81
   5   3  -2 2244.36  144.61
  -5   3   2 2125.89  141.23
  -5   3   2 2175.54  145.14
   5   3  -2 2296.21  150.41
   5  -3  -2 2107.18  147.53
  -5  -3   2 2009.59  126.65
   5  -3  -2 2072.64  138.03
   5  -3  -2 2176.16  140.72
  -5  -3   2 2198.60  144.76
  -5  -3   2 2207.70  153.68
   5  -3  -2 2164.50  129.30
  -5  -3   2 2239.23  143.34
  -5  -3   2 2364.31  149.64
   5  -3  -2 2058.97  136.25
  -5   3   1 2995.83  223.07
  -5   3   1 3240.87  254.58
   5   3  -1 3176.81  237.64
   5   3  -1 3191.38  233.40
   5   3  -1 3087.28  237.54
  -5   3   1 3258.12  242.96
  -5   3   1 3195.60  221.92
   5   3  -1 3112.49  230.92
  -5   3   1 3208.08  240.24
   5  -3  -1 3273.23  254.15
   5  -3  -1 3262.64  231.75
  -5  -3   1 3630.90  258.03
   5  -3  -1 3031.25  227.68
   5  -3  -1 3217.08  230.90
  -5  -3   1 2879.29  229.67
  -5  -3   1 3006.24  221.69
  -5  -3   1 3262.58  241.37
  -5  -3   1 3010.05  227.01
   5  -3  -1 3028.40  230.38
   5   3   0  329.32   13.51
   5   3   0  312.07   12.76
   5   3   0  296.21   12.56
  -5   3   0  303.14   11.45
  -5   3   0  347.86   17.32
  -5   3   0  318.36   14.60
   5   3   0  303.11   13.83
  -5   3   0  285.91   12.74
  -5   3   0  320.72   14.28
   5  -3   0  328.26   14.26
   5  -3   0  327.46   13.99
  -5  -3   0  312.23   11.86
  -5  -3   0  334.79   14.44
  -5  -3   0  296.65   13.14
   5  -3   0  304.55   12.45
  -5  -3   0  310.32   16.59
  -5  -3   0  313.36   16.25
   5  -3   0  348.57   12.62
  -5  -3   0  314.85   15.02
   5   3   1  140.45    6.53
   5   3   1  151.56    6.16
   5   3   1  126.72    6.19
  -5   3  -1  142.44    9.04
   5   3   1  137.63    5.41
   5   3   1  140.84    6.12
  -5   3  -1  134.53    5.78
  -5   3  -1  141.91    8.16
  -5   3  -1  130.37    9.23
  -5   3  -1  145.34    5.52
   5  -3   1  149.97    4.84
  -5  -3  -1  149.80    6.65
   5  -3   1  134.05    5.93
  -5  -3  -1  139.71    7.27
  -5  -3  -1  148.17    8.80
   5  -3   1  146.22   10.17
  -5  -3  -1  143.80    6.59
   5  -3   1  135.49    6.10
  -5  -3  -1  136.72    6.59
   5   3   2  871.46   42.05
   5   3   2  916.65   47.03
  -5   3  -2  881.69   49.86
  -5   3  -2  801.50   43.57
   5   3   2  940.35   47.04
  -5   3  -2  879.81   43.74
  -5   3  -2  855.12   47.12
  -5   3  -2  843.91   40.74
   5   3   2  856.41   41.79
   5  -3   2  833.39   49.63
  -5  -3  -2  834.81   49.39
   5  -3   2  829.47   42.08
  -5  -3  -2  964.21   48.69
  -5  -3  -2  829.52   45.66
   5  -3   2  829.21   42.43
  -5  -3  -2  914.57   47.98
  -5  -3  -2  896.39   48.18
   5  -3   2  856.38   45.80
   5  -3   2  877.56   40.26
   5   3   3 2371.64  163.97
  -5   3  -3 2183.68  139.00
   5   3   3 2244.98  147.33
  -5   3  -3 2247.95  164.12
  -5   3  -3 2314.58  161.97
   5   3   3 2240.16  150.31
   5   3   3 2538.87  175.56
  -5   3  -3 2503.23  167.04
   5  -3   3 2402.20  159.92
   5  -3   3 2266.16  158.97
  -5  -3  -3 2276.53  164.18
  -5  -3  -3 2375.18  165.57
   5  -3   3 2240.48  155.56
  -5  -3  -3 2500.34  172.69
   5  -3   3 2208.45  157.90
   5  -3   3 2249.46  158.05
  -5  -3  -3 2585.60  173.33
   5   3   4  191.73    9.86
  -5   3  -4  185.73   10.33
   5   3   4  180.11    8.48
   5   3   4  170.74    8.45
   5   3   4  188.72    8.88
  -5   3  -4  178.86    9.42
  -5   3  -4  182.93    6.19
  -5   3  -4  201.08    9.06
   5  -3   4  193.51    7.67
   5  -3   4  170.76    9.60
  -5  -3  -4  194.55    8.45
   5  -3   4  167.83    7.34
   5  -3   4  179.88    8.90
  -5  -3  -4  187.95    9.31
  -5  -3  -4  167.43    8.94
  -5  -3  -4  180.45   13.98
   5  -3   4  196.77   13.43
   5   3   5  229.45   10.03
  -5   3  -5  306.19   14.20
   5   3   5  250.22   10.39
   5   3   5  281.42   14.47
  -5   3  -5  252.78    9.21
  -5   3  -5  275.32   14.42
   5   3   5  279.13   13.21
  -5   3  -5  296.81   14.59
   5  -3   5  253.88   10.57
   5  -3   5  261.90   12.50
  -5  -3  -5  270.15   13.29
   5  -3   5  287.26   19.24
  -5  -3  -5  250.94   14.98
  -5  -3  -5  241.06   15.49
  -5  -3  -5  280.65   12.13
   5  -3   5  262.87   13.96
   5  -3   5  288.17   11.36
   5   3   6   93.68    8.67
  -5   3  -6   86.13    5.54
   5   3   6   75.56    3.92
  -5   3  -6  100.79    6.30
  -5   3  -6  103.59    5.64
   5   3   6   85.41    3.76
   5   3   6   91.93    5.44
   5  -3   6   91.60    6.33
   5  -3   6   80.49    5.82
   5  -3   6   82.79    6.49
   5  -3   6   81.20    3.40
  -5  -3  -6   80.46    5.30
   5  -3   6   82.59    4.28
  -5  -3  -6   93.45    5.33
  -5  -3  -6   81.13    6.62
  -5  -3  -6   85.91    4.02
   5   3   7  547.76   27.54
   5   3   7  450.70   22.44
   5   3   7  528.43   28.26
  -5   3  -7  437.93   27.75
   5   3   7  415.63   20.75
  -5   3  -7  532.06   28.54
  -5   3  -7  467.46   24.25
   5  -3   7  419.87   24.10
   5  -3   7  497.06   24.05
  -5  -3  -7  452.80   24.48
   5  -3   7  469.66   28.02
  -5  -3  -7  485.45   24.84
  -5  -3  -7  441.13   32.66
  -5  -3  -7  480.44   21.90
  -5   3  -8   44.75    4.43
   5   3   8   41.73    2.45
   5   3   8   37.70    2.88
  -5   3  -8   40.69    3.63
   5   3   8   49.84    4.66
  -5   3  -8   46.71    3.70
   5   3   8   49.70    4.06
   5  -3   8   39.22    2.91
  -5  -3  -8   39.35    5.03
   5  -3   8   40.60    4.22
   5  -3   8   43.72    4.92
  -5  -3  -8   41.72    5.64
  -5  -3  -8   59.44    5.12
   5   3   9 1080.53   62.45
   5   3   9 1233.17   78.51
   5   3   9 1305.22   82.66
  -5   3  -9 1228.97   75.26
   5   3   9 1015.46   67.96
  -5   3  -9 1269.38   81.64
  -5  -3  -9 1166.26   80.77
   5  -3   9 1170.65   80.40
  -5  -3  -9 1026.31   72.12
  -5  -3  -9 1312.37   84.48
   5  -3   9 1064.64   70.65
   5   3  10   -0.14    1.78
   5   3  10    0.00    2.40
   5   3  10    0.69    1.59
   5   3  10    1.19    0.78
   5  -3  10    1.73    1.70
   5  -3  10    1.65    1.53
  -5  -3 -10    2.49    1.15
   5   3  11    2.96    1.78
   5   3  11    1.77    1.66
   5  -3  11    0.83    1.63
   5  -3  11    1.46    1.89
  -5  -3 -11    0.89    1.14
   5   3  12   64.60    6.59
   5  -3  12   56.59    6.39
   5  -3  12   46.17    7.23
  -5  -3 -12   58.40    7.23
   5   3  13    0.43    1.78
   5  -3  13   -2.93    2.05
   5  -3  13   -0.48    1.77
  -5  -3 -13   -0.94    1.90
   5   3  14  169.96   13.38
   5  -3  14  153.68   14.57
   5  -3  14  179.45   13.63
  -5  -3 -14  164.47   14.61
   5   3  15   42.13    5.64
   5  -3  15   26.52    6.37
   5  -3  15   33.58    5.68
  -5  -3 -15   32.50    5.92
   5   3  16   56.05    6.89
   5  -3  16   47.33    7.96
   5  -3  16   59.08    7.03
  -5  -3 -16   54.63    7.36
   5   3  17  220.29   16.19
   5  -3  17  176.49   17.26
   5  -3  17  234.44   16.86
  -5  -3 -17  194.70   20.91
   5   3  18   22.35    4.09
   5  -3  18   18.50    4.18
   5  -3  18   14.40    7.13
  -5  -3 -18   15.19    3.74
   5   3  19   40.56    5.20
  -5   3 -19   38.76    5.92
  -5  -3 -19   32.81    4.77
   5  -3  19   31.54    5.78
   5   3  20    2.30    2.65
  -5   3 -20    0.18    1.90
   5  -3  20    2.57    1.76
  -5  -3 -20    0.71    1.35
   5   3  21    1.94    2.32
  -5   3 -21   -0.09    1.57
   5  -3  21    3.03    1.45
  -5  -3 -21    0.13    1.09
   5   5 -23    0.00    2.02
  -5   5  23   -2.17    1.39
  -5  -5  23   -0.19    1.18
   5  -5 -23    0.48    2.42
   5   5 -22    0.01    1.82
  -5   5  22    4.48    1.95
   5  -5 -22    6.33    3.47
  -5  -5  22    2.40    1.89
  -5   5  21    6.19    2.65
   5   5 -21    2.94    3.96
   5  -5 -21    7.74    3.04
  -5  -5  21    5.45    2.53
   5   5 -20   41.24    5.68
  -5   5  20   52.32    6.30
  -5  -5  20   44.44    6.01
   5  -5 -20   45.23    6.98
   5   5 -19    3.10    2.14
  -5   5  19    3.38    2.42
  -5   5  19    2.56    2.53
  -5  -5  19    2.06    2.27
   5   5 -18   52.87   10.45
  -5   5  18   63.19   11.70
  -5   5  18   70.70    8.15
  -5  -5  18   53.68   11.52
   5   5 -17    9.02    3.59
  -5   5  17   14.87    4.06
  -5   5  17   14.61    3.95
  -5  -5  17   13.23    3.93
   5   5 -16   13.70    4.10
  -5   5  16   24.83    4.34
  -5   5  16   20.74    4.53
  -5  -5  16   19.42    4.52
   5   5 -15   51.43    6.61
  -5   5  15   55.15    6.64
  -5   5  15   47.07   10.04
  -5  -5  15   54.92    6.86
   5   5 -14   51.76    6.26
  -5   5  14   60.73    6.75
  -5   5  14   60.85    9.68
  -5  -5  14   53.37    6.82
   5   5 -13  159.04   12.16
  -5   5  13  177.01   12.94
  -5   5  13  180.59   12.59
   5  -5 -13  155.53   10.98
   5  -5 -13  169.02   10.69
  -5  -5  13  165.72   12.91
   5   5 -12    2.26    1.71
  -5   5  12    0.59    1.79
  -5   5  12    5.10    1.68
   5  -5 -12    1.00    1.35
  -5  -5  12    1.00    1.34
  -5  -5  12    1.29    1.82
   5  -5 -12    2.02    2.14
   5   5 -11   27.25    3.60
  -5   5  11   24.62    3.70
  -5   5  11   24.01    3.45
   5  -5 -11   22.30    2.98
  -5  -5  11   19.51    2.81
  -5  -5  11   18.83    2.81
  -5  -5  11   24.73    3.77
   5  -5 -11   26.14    4.88
  -5   5  10   17.16    3.07
   5   5 -10   12.82    2.90
  -5   5  10   14.73    2.79
   5  -5 -10   14.94    2.58
  -5  -5  10   13.21    2.45
  -5  -5  10   16.54    3.76
  -5  -5  10   17.13    3.12
   5  -5 -10   20.46    4.36
  -5   5   9  466.25   27.37
   5   5  -9  498.93   27.01
   5   5  -9  489.34   27.82
   5   5  -9  445.01   26.44
  -5   5   9  472.52   26.94
   5  -5  -9  499.12   32.04
   5  -5  -9  436.50   28.14
  -5  -5   9  407.75   23.76
  -5  -5   9  454.92   26.12
  -5  -5   9  441.39   25.42
   5  -5  -9  469.34   27.52
  -5  -5   9  492.81   33.35
   5   5  -8  293.03   16.11
  -5   5   8  271.04   15.63
   5   5  -8  284.01   16.21
   5   5  -8  262.04   14.87
  -5   5   8  271.18   17.28
  -5   5   8  289.98   16.31
   5  -5  -8  270.65   16.56
  -5  -5   8  258.21   14.75
  -5  -5   8  282.96   19.11
   5  -5  -8  270.28   16.56
   5  -5  -8  281.05   16.11
  -5  -5   8  277.98   15.88
  -5  -5   8  259.14   14.87
   5   5  -7  138.94    8.70
   5   5  -7  146.67   11.44
   5   5  -7  141.85    8.58
  -5   5   7  126.68    9.81
  -5   5   7  142.96    8.51
  -5   5   7  128.57    8.29
   5  -5  -7  140.41    9.09
   5  -5  -7  127.67    8.64
  -5  -5   7  135.46    8.39
  -5  -5   7  147.67    8.56
   5  -5  -7  127.70   12.16
  -5  -5   7  132.31    8.20
  -5  -5   7  142.49    9.17
   5   5  -6   91.62    6.45
   5   5  -6  108.47    7.28
   5   5  -6  112.65    6.95
  -5   5   6  111.99    6.81
  -5   5   6  100.71    8.58
  -5   5   6  110.37    7.07
   5  -5  -6   92.01    7.13
   5  -5  -6   99.50    7.58
  -5  -5   6  102.77    7.76
  -5  -5   6  106.10    6.85
  -5  -5   6  104.78    7.01
  -5  -5   6  117.14    6.60
   5  -5  -6  105.24    6.94
   5   5  -5  437.29   23.31
   5   5  -5  431.58   24.70
  -5   5   5  415.91   32.23
   5   5  -5  466.56   24.49
  -5   5   5  420.69   23.29
  -5   5   5  461.01   23.97
   5  -5  -5  421.25   24.05
  -5  -5   5  422.88   23.46
   5  -5  -5  431.01   24.95
   5  -5  -5  380.18   25.30
   5  -5  -5  412.09   22.66
  -5  -5   5  401.70   22.99
  -5  -5   5  442.09   26.05
  -5  -5   5  456.93   22.90
  -5   5   4    2.70    1.73
   5   5  -4    3.51    1.53
   5   5  -4    3.91    1.88
  -5   5   4    3.58    1.36
  -5   5   4    2.34    2.09
   5   5  -4    5.10    1.35
  -5   5   4    3.83    1.60
   5  -5  -4    5.16    2.12
   5  -5  -4    5.41    2.78
  -5  -5   4    3.38    1.06
   5  -5  -4    4.18    1.60
   5  -5  -4    5.36    1.30
  -5  -5   4    4.14    2.65
  -5  -5   4    4.56    2.03
  -5  -5   4    5.67    1.73
   5   5  -3   16.43    2.22
   5   5  -3   17.78    3.24
  -5   5   3   24.06    2.95
  -5   5   3   22.56    2.70
   5   5  -3   17.71    2.43
  -5   5   3   18.84    2.02
  -5   5   3   21.90    3.69
   5  -5  -3   19.95    2.00
   5  -5  -3   19.21    2.92
   5  -5  -3   23.19    3.80
   5  -5  -3   22.41    2.71
  -5  -5   3   19.57    1.82
  -5  -5   3   19.74    3.50
  -5  -5   3   16.58    2.97
  -5  -5   3   16.14    2.85
  -5   5   2 1017.75   56.67
   5   5  -2 1034.46   66.47
   5   5  -2 1007.51   59.49
  -5   5   2 1003.42   61.62
   5   5  -2 1109.20   63.99
  -5   5   2 1017.03   61.33
  -5   5   2  935.46   63.64
   5  -5  -2  988.87   59.63
   5  -5  -2 1028.19   63.00
  -5  -5   2 1127.77   60.30
   5  -5  -2  964.79   72.26
  -5  -5   2 1034.66   63.53
  -5  -5   2 1033.74   68.44
  -5  -5   2 1021.43   62.49
   5  -5  -2 1083.01   59.75
   5   5  -1  175.84    9.11
  -5   5   1  173.41    7.26
   5   5  -1  151.15    8.12
  -5   5   1  158.93   16.18
  -5   5   1  162.21    9.47
  -5   5   1  146.91    9.24
   5  -5  -1  170.04    7.04
  -5  -5   1  163.48    9.60
  -5  -5   1  158.25    7.50
   5  -5  -1  156.38   12.82
   5  -5  -1  149.29    8.87
  -5  -5   1  164.32    6.92
  -5  -5   1  160.38   11.73
  -5  -5   1  153.76    9.78
   5  -5  -1  164.75   11.45
  -5  -5   1  180.76   10.84
  -5  -5   1  143.59    7.46
   5   5   0   61.51    3.13
  -5   5   0   63.09    4.98
   5   5   0   62.12    6.12
   5   5   0   49.05    4.83
  -5   5   0   57.75    2.69
  -5   5   0   54.63    4.68
  -5   5   0   58.95    6.20
   5  -5   0   53.47    4.56
   5  -5   0   58.94    2.92
  -5  -5   0   58.39    6.41
  -5  -5   0   55.40    4.73
   5  -5   0   55.81    4.27
   5  -5   0   57.60    5.67
  -5  -5   0   60.39    5.52
  -5  -5   0   52.26    3.90
   5   5   1    6.05    1.35
   5   5   1   11.30    2.77
   5   5   1    7.76    1.70
  -5   5  -1   11.14    2.18
  -5   5  -1    9.69    2.21
  -5   5  -1    7.49    1.06
   5   5   1    8.11    1.38
  -5   5  -1    8.21    2.72
   5  -5   1    8.16    1.77
   5  -5   1    8.67    1.96
  -5  -5  -1   10.03    1.96
  -5  -5  -1    9.81    2.00
  -5  -5  -1    7.74    2.89
   5  -5   1    7.20    1.28
  -5  -5  -1    9.35    2.38
   5  -5   1   10.85    2.45
  -5  -5  -1    8.20    1.75
   5   5   2  336.61   14.83
   5   5   2  358.49   18.30
  -5   5  -2  329.52   21.43
   5   5   2  371.37   17.80
  -5   5  -2  332.24   18.78
  -5   5  -2  334.88   19.52
  -5   5  -2  328.54   15.18
   5  -5   2  328.57   18.25
  -5  -5  -2  367.81   20.79
   5  -5   2  333.56   17.34
   5  -5   2  330.35   16.48
  -5  -5  -2  301.96   17.97
  -5  -5  -2  343.59   22.88
  -5  -5  -2  343.80   18.68
  -5  -5  -2  313.20   21.55
   5  -5   2  335.11   19.75
   5   5   3 1108.80   71.05
  -5   5  -3 1166.96   84.67
  -5   5  -3 1116.77   70.97
  -5   5  -3 1150.99   73.75
   5   5   3 1232.58   73.74
  -5   5  -3 1260.06   72.13
   5  -5   3 1033.64   68.87
   5  -5   3 1080.60   68.22
  -5  -5  -3 1104.47   70.88
  -5  -5  -3 1153.49   80.34
  -5  -5  -3 1118.78   69.89
  -5  -5  -3 1017.33   66.57
   5  -5   3 1150.01   69.35
   5  -5   3 1149.52   70.41
  -5  -5  -3 1079.77   71.17
  -5   5  -4  146.85   14.20
   5   5   4  152.11    8.57
   5   5   4  150.10    8.64
  -5   5  -4  165.04    8.16
  -5   5  -4  147.90    9.34
  -5   5  -4  146.65    9.78
   5  -5   4  140.40    7.72
   5  -5   4  121.02    7.56
  -5  -5  -4  130.64    8.87
   5  -5   4  125.16   10.68
  -5  -5  -4  160.56    8.88
  -5  -5  -4  142.30    9.39
  -5  -5  -4  141.83    9.65
   5  -5   4  148.61    9.26
   5   5   5    1.28    1.18
  -5   5  -5    0.16    2.38
  -5   5  -5    0.88    1.49
   5   5   5    0.79    1.22
  -5   5  -5    0.23    1.52
   5  -5   5    1.15    1.22
   5  -5   5    1.37    0.97
   5  -5   5    1.70    1.46
  -5  -5  -5    2.32    1.07
  -5  -5  -5    1.18    1.39
   5  -5   5    0.47    1.24
  -5  -5  -5    0.52    1.31
  -5  -5  -5    3.10    1.52
   5   5   6    6.09    1.70
  -5   5  -6    6.92    1.39
   5   5   6    5.98    2.91
  -5   5  -6    3.72    2.16
  -5   5  -6    5.64    2.13
   5  -5   6    6.94    1.84
   5  -5   6   -0.00    1.34
  -5  -5  -6    4.73    1.83
   5  -5   6    3.70    1.25
   5  -5   6    3.69    1.66
  -5  -5  -6    6.57    2.30
   5   5   7  238.01   14.59
   5   5   7  242.87   14.11
  -5   5  -7  224.37   15.13
  -5   5  -7  199.18   14.67
   5  -5   7  212.13   12.54
   5  -5   7  210.72   14.22
  -5  -5  -7  247.33   13.94
  -5  -5  -7  244.93   14.13
   5   5   8   42.49    6.81
   5   5   8   39.10    4.91
  -5   5  -8   36.15    7.39
  -5   5  -8   32.67    8.13
   5  -5   8   37.34    4.78
  -5  -5  -8   40.13    4.24
   5   5   9  150.80   11.29
  -5   5  -9  117.92   11.32
   5   5   9  150.32   10.51
   5  -5   9  128.80   10.98
  -5  -5  -9  151.34    9.75
   5   5  10   60.81    6.28
  -5   5 -10   53.01    7.27
  -5  -5 -10   57.15    5.67
   5  -5  10   58.89    6.73
  -5  -5 -10   57.68    7.62
  -5   5 -11    1.07    1.83
   5   5  11    0.51    1.63
   5  -5  11    0.17    1.72
  -5  -5 -11    1.82    1.43
  -5  -5 -11   -1.21    1.91
   5   5  12  144.64   12.04
  -5   5 -12  130.44   12.16
  -5  -5 -12  144.98   13.08
   5  -5  12  120.98   11.61
  -5   5 -13  145.61   13.33
   5   5  13  160.67   12.70
   5  -5  13  122.67   11.95
  -5  -5 -13  152.07   13.87
  -5   5 -14    1.90    2.46
   5   5  14   -0.71    3.59
   5  -5  14    3.63    2.35
  -5  -5 -14    3.39    2.55
   5   5  15    2.26    3.99
  -5   5 -15    1.03    4.06
   5  -5  15    3.52    4.20
  -5  -5 -15    4.73    2.76
  -5   5 -16  101.01   10.00
   5   5  16  101.99    9.11
   5  -5  16   84.01    9.54
  -5  -5 -16   97.73   10.63
  -5   5 -17   46.02    6.47
   5   5  17   55.62    5.92
   5  -5  17   45.16    9.94
  -5  -5 -17   46.72    6.45
  -5   5 -18  128.68   10.54
   5   5  18  140.47    9.91
   5  -5  18  117.28   10.45
  -5  -5 -18  112.84   10.44
   5   5  19    0.98    1.57
  -5   5 -19    0.00    1.67
   5  -5  19    3.50    1.61
  -5  -5 -19    1.55    1.61
  -5   7  20   44.97    4.64
   5   7 -20   33.45    5.85
   5  -7 -20   37.79    4.92
  -5  -7  20   33.94    5.36
   5   7 -19    3.85    1.80
  -5   7  19    4.84    2.45
   5  -7 -19    6.23    2.37
  -5  -7  19    3.24    1.71
  -5   7  18   67.40    7.07
   5   7 -18   49.98    5.45
   5  -7 -18   55.75    6.62
  -5  -7  18   51.40    5.08
   5   7 -17    6.09    3.80
  -5   7  17    9.05    3.07
   5  -7 -17    4.20    3.06
  -5  -7  17    5.36    3.44
   5   7 -16    1.24    2.57
  -5   7  16    2.68    2.97
   5  -7 -16   -0.24    1.98
  -5  -7  16    1.05    1.38
   5   7 -15  247.98   18.91
  -5   7  15  303.63   21.11
  -5   7  15  297.95   19.76
  -5  -7  15  268.56   17.68
   5   7 -14    5.80    2.85
  -5   7  14   11.70    3.21
  -5   7  14    7.47    4.59
  -5  -7  14    8.35    2.47
   5   7 -13   40.54    8.35
  -5   7  13   43.90    5.76
  -5   7  13   45.64    5.42
   5  -7 -13   32.01    4.70
   5  -7 -13   44.87    7.31
  -5  -7  13   40.69    4.72
  -5   7  12   36.62    4.81
  -5   7  12   37.91    5.25
   5   7 -12   32.17    4.83
   5  -7 -12   28.73    6.43
  -5  -7  12   33.53    4.25
   5  -7 -12   32.58    4.55
  -5   7  11    4.46    2.15
   5   7 -11    0.76    2.04
  -5   7  11    1.96    1.92
  -5  -7  11    3.77    2.99
   5  -7 -11    3.35    2.00
  -5  -7  11    2.63    2.78
   5  -7 -11    4.64    2.05
   5   7 -10    2.21    2.22
  -5   7  10    4.88    1.95
  -5   7  10    4.27    2.25
   5  -7 -10    2.65    2.15
  -5  -7  10    5.09    1.75
  -5  -7  10    1.94    3.27
   5  -7 -10    3.43    2.29
  -5   7   9    4.83    2.79
   5   7  -9    6.00    3.89
  -5   7   9    8.02    2.29
   5  -7  -9    6.60    2.65
  -5  -7   9   10.47    2.44
   5  -7  -9    5.29    2.91
  -5  -7   9    7.90    2.08
   5   7  -8   28.61    4.32
  -5   7   8   30.87    3.91
  -5   7   8   34.37    4.90
   5  -7  -8   30.02    7.22
  -5  -7   8   30.05    3.59
  -5  -7   8   27.54    4.39
  -5  -7   8   27.81    4.43
   5  -7  -8   36.93    7.96
   5   7  -7  247.36   21.85
  -5   7   7  281.32   18.91
   5  -7  -7  281.79   20.58
  -5  -7   7  251.40   18.15
   5  -7  -7  280.94   19.75
  -5  -7   7  271.78   15.92
  -5  -7   7  264.83   18.59
  -5   7   6  109.06   11.08
   5   7  -6   87.63    7.80
  -5   7   6  101.58    8.53
   5  -7  -6   99.57    9.14
  -5  -7   6  100.27    8.74
  -5  -7   6   96.79    8.39
  -5   7   5  102.19    9.06
   5   7  -5   92.98   10.71
  -5   7   5   92.73   10.63
   5  -7  -5   87.19   12.62
  -5  -7   5   89.57    8.31
  -5  -7   5   85.29    8.17
  -5   7   4  442.46   41.97
   5   7  -4  414.70   26.76
  -5   7   4  500.77   37.48
  -5  -7   4  457.56   29.98
   5  -7  -4  432.58   29.99
  -5  -7   4  441.53   29.09
  -5   7   3   99.23    8.77
   5   7  -3   88.48    7.18
  -5   7   3   92.88   10.40
   5  -7  -3   84.77    8.60
  -5  -7   3   91.85    8.64
  -5  -7   3   97.67    8.86
  -5   7   2   16.00    4.69
  -5   7   2   14.18    3.62
  -5  -7   2   19.42    3.97
  -5  -7   2   18.95    3.91
   5  -7  -2   17.12    3.71
  -5   7   1  734.26   63.33
  -5  -7   1  755.93   51.68
   5  -7  -1  726.41   48.87
  -5  -7   1  762.89   51.40
   5   7   0  473.04   28.42
  -5   7   0  436.62   32.39
   5  -7   0  398.43   27.51
  -5  -7   0  455.49   30.46
  -5  -7   0  478.81   30.95
  -5   7  -1    1.44    2.07
   5   7   1    3.26    1.79
  -5   7  -1    2.27    2.60
  -5  -7  -1    2.48    2.11
   5  -7   1    4.05    1.92
  -5  -7  -1    2.98    2.42
  -5   7  -2    7.92    4.16
   5   7   2    9.48    2.34
  -5   7  -2    5.76    3.20
   5  -7   2   -0.50    2.59
  -5  -7  -2    5.46    3.07
  -5  -7  -2    9.69    2.56
  -5   7  -3   79.62    9.01
   5   7   3   88.54    7.23
  -5   7  -3   78.88    7.94
  -5  -7  -3   84.33    8.65
   5  -7   3   63.69    9.91
  -5  -7  -3   81.41    7.55
   5   7   4   36.74    6.46
  -5   7  -4   31.54    5.54
  -5   7  -4   29.21    7.55
   5  -7   4   26.86    4.32
  -5  -7  -4   38.21    5.24
  -5  -7  -4   33.36    4.64
   5   7   5  594.30   36.54
  -5   7  -5  587.54   39.85
  -5   7  -5  544.39   38.98
   5  -7   5  487.12   33.84
  -5  -7  -5  594.25   38.62
  -5  -7  -5  634.23   40.84
  -5  -7  -5  485.90   35.03
   5   7   6   56.58    5.62
  -5   7  -6   55.14    9.94
  -5   7  -6   53.75    6.70
  -5  -7  -6   48.23    6.32
  -5  -7  -6   55.87    6.37
   5  -7   6   42.87    5.43
  -5  -7  -6   57.81    6.18
   5   7   7   19.43    3.68
  -5   7  -7   22.50    4.16
  -5   7  -7   19.40    6.55
  -5  -7  -7   16.61    3.84
  -5  -7  -7   15.07    3.28
  -5  -7  -7   20.14    3.83
   5   7   8    3.95    2.27
  -5   7  -8    5.17    2.61
  -5  -7  -8    3.00    2.46
  -5  -7  -8    4.54    1.99
  -5  -7  -8    4.97    2.31
   5   7   9   13.75    5.25
  -5   7  -9   10.60    3.69
  -5  -7  -9   14.62    3.50
   5  -7   9    9.97    3.11
  -5  -7  -9   20.01    5.10
   5   7  10   10.16    2.88
  -5   7 -10    7.95    3.25
   5  -7  10    6.89    2.64
  -5  -7 -10    8.21    3.18
  -5  -7 -10    8.33    2.64
  -5   7 -11    3.70    2.44
   5   7  11    2.68    2.26
   5  -7  11    2.59    1.90
  -5  -7 -11    4.00    2.04
  -5  -7 -11    1.87    2.41
   5   7  12   74.70    7.19
  -5   7 -12   60.42    7.28
   5  -7  12   50.82    8.65
  -5  -7 -12   59.82    6.63
  -5  -7 -12   64.28    7.56
   5   7  13    5.53    2.65
  -5   7 -13    8.12    2.77
  -5  -7 -13    3.73    2.59
   5  -7  13    6.38    2.23
   5   7  14   19.61    3.47
  -5   7 -14   15.97    3.47
   5  -7  14    7.64    2.66
  -5  -7 -14   14.13    3.38
   5   7  15   10.72    2.86
  -5   7 -15   10.89    4.60
   5  -7  15    5.46    3.50
  -5  -7 -15   13.11    2.96
   5   7  16    2.74    1.50
  -5   7 -16    1.33    1.61
   5  -7  16    1.17    1.29
  -5  -7 -16    2.96    1.66
   5   9 -15    0.10    0.96
  -5   9  15    2.16    1.41
  -5   9  14   71.59    5.88
   5   9 -14   49.49    4.36
   5  -9 -14   48.35    5.52
   5   9 -13   16.80    2.65
  -5   9  13   10.37    5.79
   5  -9 -13   23.04    2.69
   5  -9 -13   13.35    2.55
   5   9 -12   22.29    3.21
  -5   9  12   29.41    4.16
   5  -9 -12   21.15    3.42
   5  -9 -12   25.59    3.42
   5   9 -11   22.44    3.16
  -5   9  11   26.43    3.92
   5  -9 -11   23.49    3.46
   5  -9 -11   23.43    3.38
  -5  -9  11    5.61    3.30
   5   9 -10   62.31    5.87
  -5   9  10   72.94    6.80
   5  -9 -10   66.39    6.74
   5  -9 -10   67.16    6.44
  -5  -9  10   54.02    6.34
   5   9  -9   33.93    6.41
  -5   9   9   38.15    4.65
   5  -9  -9   32.60    4.85
   5  -9  -9   35.61    4.79
  -5  -9   9   26.06    4.60
   5   9  -8   53.82    5.77
  -5   9   8   59.43    6.50
   5  -9  -8   65.41    6.72
   5  -9  -8   65.44    6.90
  -5  -9   8   46.94    6.27
   5   9  -7   23.94    3.84
  -5   9   7   26.95    4.43
   5  -9  -7   28.27    4.54
   5  -9  -7   30.50    7.40
  -5  -9   7   20.48    6.48
  -5  -9   7   21.37    4.03
   5   9  -6   45.69    7.67
  -5   9   6   49.83    5.94
   5  -9  -6   47.80    6.05
  -5  -9   6   38.63    6.02
   5  -9  -6   51.30    6.52
  -5  -9   6   45.99    5.70
   5   9  -5   19.01    3.78
  -5   9   5   22.48    4.37
   5  -9  -5   22.28    4.42
   5  -9  -5   23.65    4.81
  -5  -9   5   23.37    6.33
  -5  -9   5   21.40    6.81
   5   9  -4   50.43    5.83
  -5   9   4   56.81    6.46
   5  -9  -4   59.40    7.56
   5  -9  -4   48.41    6.73
  -5  -9   4   59.60    6.73
  -5  -9   4   49.26    7.03
   5  -9  -3   68.29    8.54
   5  -9  -3   63.04    8.04
  -5  -9   3   72.49   11.00
  -5  -9   3   66.36    7.78
   5  -9  -2   80.15    8.83
   5  -9  -2   92.64    9.76
  -5  -9   2  100.76   13.01
  -5  -9   2   81.37    8.98
   5  -9  -1   24.54    5.04
   5  -9  -1   21.98    4.52
  -5  -9   1   21.98    4.54
  -5  -9   1   22.40    7.10
   5   9   0    8.46    2.85
   5  -9   0    7.50    3.10
   5  -9   0    1.78    5.59
  -5  -9   0   11.69    3.41
  -5  -9   0   11.79    3.30
  -5   9  -1   32.60    5.09
   5   9   1   32.88    4.55
   5  -9   1   42.76    8.79
  -5  -9  -1   34.63    5.41
   5  -9   1   24.36    4.65
  -5  -9  -1   30.78    5.31
   5   9   2    6.31    2.47
  -5   9  -2    9.45    2.75
   5  -9   2    8.08    4.88
   5  -9   2    3.62    2.89
  -5  -9  -2    9.26    3.05
  -5  -9  -2    6.31    3.22
   5   9   3   25.12    3.78
  -5   9  -3   24.90    6.55
   5  -9   3   22.14    4.10
  -5  -9  -3   24.22    4.56
   5  -9   3   32.86    7.13
  -5  -9  -3   26.62    4.82
   5   9   4    5.01    2.05
  -5   9  -4    3.04    2.37
   5  -9   4    4.96    2.17
  -5  -9  -4    4.65    2.56
   5  -9   4    4.73    2.43
  -5  -9  -4    4.98    3.60
  -5   9  -5    9.07    2.51
   5   9   5    2.95    2.24
   5  -9   5    5.45    2.47
  -5  -9  -5    4.59    2.33
  -5  -9  -5    7.19    2.72
   5  -9   5    5.29    2.18
  -5   9  -6    7.07    2.52
   5   9   6    8.35    2.41
   5  -9   6    3.16    3.78
  -5  -9  -6    7.70    2.72
  -5  -9  -6    5.11    2.31
   5   9   7    2.87    1.84
  -5   9  -7    0.53    3.09
  -5  -9  -7    3.97    1.99
  -5  -9  -7    2.16    1.62
   5   9   8    0.68    1.70
  -5   9  -8    0.93    1.14
  -5  -9  -8   -0.72    0.82
  -5  -9  -8    1.85    1.93
   5   9   9    0.87    1.27
  -5   9  -9    0.46    1.29
  -5  -9  -9    0.39    1.27
   5   9  10    6.23    2.19
  -5   9 -10    6.96    2.28
  -5  -9 -10    7.60    2.12
   5   9  11    1.17    1.28
  -5   9 -11    1.41    1.98
  -5  -9 -11   -0.06    1.50
  -6   0  26   19.46    3.37
  -6   0  25    1.46    1.71
  -6   0  24  735.10   47.76
  -6   0  23    1.34    1.92
  -6   0  22  256.02   18.26
  -6   0  21    0.67    2.73
  -6   0  21    0.73    1.55
  -6   0  20    0.93    1.84
  -6   0  20    2.08    1.87
  -6   0  19    0.59    2.77
  -6   0  19    1.78    1.82
  -6   0  18  194.56   11.61
  -6   0  18  183.71   13.16
  -6   0  18  172.53   13.33
  -6   0  17   -0.44    1.86
  -6   0  17    0.94    1.17
  -6   0  17   -0.02    0.90
   6   0 -16    1.60    0.98
  -6   0  16    0.88    1.44
  -6   0  16    2.20    1.07
  -6   0  16    0.38    1.43
   6   0 -15    4.42    1.44
   6   0 -15    4.20    1.08
  -6   0  15    1.68    1.26
  -6   0  15    1.87    1.56
  -6   0  15    1.92    1.52
   6   0 -14  178.86   12.36
   6   0 -14  163.59   11.97
   6   0 -14  187.76    8.88
  -6   0  14  175.91    9.04
  -6   0  14  169.39    9.96
  -6   0  14  172.15   10.54
   6   0 -13    0.79    1.06
   6   0 -13    1.06    0.83
   6   0 -13   -0.02    0.40
   6   0 -13    0.69    0.83
  -6   0  13    0.74    0.42
  -6   0  13    0.29    0.95
  -6   0  13   -0.50    0.92
  -6   0  13    0.50    0.74
   6   0 -12  386.33   17.20
   6   0 -12  361.48   18.24
   6   0 -12  379.65   16.66
   6   0 -12  348.52   17.46
  -6   0  12  375.77   18.03
  -6   0  12  333.26   17.75
  -6   0  12  372.84   19.54
  -6   0  12  365.62   15.09
   6   0 -11    0.40    1.01
   6   0 -11    0.27    0.92
   6   0 -11    0.82    0.97
   6   0 -11    0.54    0.81
  -6   0  11    1.42    0.97
  -6   0  11    5.22    0.96
  -6   0  11    3.68    1.12
  -6   0  11    2.69    1.20
   6   0 -10  273.15   11.75
   6   0 -10  265.77   11.81
   6   0 -10  285.10   12.81
   6   0 -10  276.34   11.36
  -6   0  10  280.03   13.20
  -6   0  10  263.49   12.62
  -6   0  10  294.54   12.90
  -6   0  10  293.41   12.44
   6   0  -9   11.83    1.26
   6   0  -9    9.20    1.35
   6   0  -9   13.62    0.93
   6   0  -9   12.32    1.20
  -6   0   9   10.33    1.49
  -6   0   9   11.27    1.44
  -6   0   9   12.07    1.40
  -6   0   9   14.12    1.50
   6   0  -8 4128.70  326.81
   6   0  -8 4279.85  333.07
   6   0  -8 3417.21  263.62
   6   0  -8 3617.63  280.71
  -6   0   8 3368.83  268.17
  -6   0   8 4303.41  341.13
  -6   0   8 3785.20  292.82
  -6   0   8 4140.26  324.82
   6   0  -7   25.38    1.92
   6   0  -7   21.63    2.05
   6   0  -7   30.99    1.75
   6   0  -7   23.93    1.74
  -6   0   7   22.57    2.10
  -6   0   7   24.11    2.04
  -6   0   7   20.97    2.19
  -6   0   7   29.35    1.80
   6   0  -6 1925.57  106.84
   6   0  -6 2454.69  155.13
   6   0  -6 1960.14  125.02
   6   0  -6 2404.01  150.45
   6   0  -6 2279.95  138.57
  -6   0   6 2006.60  126.15
  -6   0   6 2348.37  147.95
  -6   0   6 2179.42  136.44
  -6   0   6 2202.12  125.37
  -6   0   6 2304.32  148.11
   6   0  -5    1.65    0.78
   6   0  -5    2.34    0.87
   6   0  -5    1.77    0.60
   6   0  -5    1.07    0.88
   6   0  -5    2.38    0.55
  -6   0   5    2.47    0.75
  -6   0   5    2.75    0.59
  -6   0   5    2.38    0.71
  -6   0   5    3.08    0.86
   6   0  -4 1438.46   71.71
   6   0  -4 1208.40   58.90
   6   0  -4 1472.30   68.34
   6   0  -4 1252.11   64.60
   6   0  -4 1446.18   72.47
  -6   0   4 1392.98   71.34
  -6   0   4 1392.27   68.26
  -6   0   4 1361.73   65.57
  -6   0   4 1126.49   53.31
  -6   0   4 1230.36   63.19
   6   0  -3    3.54    0.58
   6   0  -3    2.82    0.79
   6   0  -3    3.75    0.62
   6   0  -3    3.80    0.44
  -6   0   3    3.65    0.61
  -6   0   3    3.96    0.50
  -6   0   3    4.44    0.61
  -6   0   3    3.76    0.44
   6   0  -2 2218.79  139.05
   6   0  -2 2499.16  153.97
   6   0  -2 2637.74  161.88
   6   0  -2 2547.05  153.55
  -6   0   2 2797.39  173.98
  -6   0   2 2218.40  139.01
  -6   0   2 2355.02  132.75
  -6   0   2 2451.17  150.91
   6   0  -1    1.19    0.53
   6   0  -1    0.91    0.22
   6   0  -1    0.52    0.90
   6   0  -1    2.25    0.43
   6   0  -1    0.76    0.61
  -6   0   1    1.00    0.23
  -6   0   1    0.88    0.49
  -6   0   1    1.54    0.53
  -6   0   1    1.03    0.46
  -6   0   1    0.98    0.60
   6   0   0 3502.36  237.56
   6   0   0 3204.93  222.67
   6   0   0 3533.81  254.97
   6   0   0 3563.07  255.38
   6   0   0 3275.79  231.90
  -6   0   0 3283.64  227.50
  -6   0   0 3393.56  230.75
  -6   0   0 3159.82  227.52
  -6   0   0 3372.93  239.20
  -6   0   0 3144.35  227.95
   6   0   1    0.62    0.67
   6   0   1   -0.00    0.78
   6   0   1    0.78    0.86
  -6   0  -1    0.27    0.67
  -6   0  -1   -0.09    0.90
  -6   0  -1    0.89    0.88
  -6   0  -1    0.50    0.25
  -6   0  -1    0.53    0.85
  -6   0  -1   -0.53    1.00
   6   0   2 3371.68  248.70
   6   0   2 3190.86  230.71
   6   0   2 3057.94  196.01
   6   0   2 3096.87  224.73
  -6   0  -2 3429.69  250.75
  -6   0  -2 3647.10  260.39
  -6   0  -2 2728.31  174.26
  -6   0  -2 3592.15  264.31
  -6   0  -2 3195.80  228.67
   6   0   3   12.51    1.97
   6   0   3    8.52    1.81
   6   0   3    8.62    1.28
  -6   0  -3    9.93    1.17
  -6   0  -3   10.75    2.11
  -6   0  -3    6.25    1.40
  -6   0  -3    9.96    1.23
   6   0   4 4312.47  357.03
   6   0   4 4012.61  330.11
   6   0   4 4371.87  362.64
  -6   0  -4 4702.12  389.01
  -6   0  -4 4687.56  382.64
  -6   0  -4 4182.42  344.58
  -6   0  -4 4351.67  359.92
   6   0   5    2.10    0.66
   6   0   5    2.08    0.89
   6   0   5    1.78    0.89
  -6   0  -5   -0.60    0.87
  -6   0  -5    3.34    1.57
  -6   0  -5    2.90    0.85
  -6   0  -5    2.06    0.72
   6   0   6  408.53   19.53
   6   0   6  385.68   19.50
   6   0   6  358.93   16.01
  -6   0  -6  397.98   18.90
  -6   0  -6  359.34   16.20
  -6   0  -6  443.43   24.00
  -6   0  -6  429.94   19.67
   6   0   7    0.10    0.55
   6   0   7    1.04    0.89
   6   0   7   -0.14    1.46
  -6   0  -7    0.25    0.57
  -6   0  -7    0.66    1.32
  -6   0  -7    1.52    0.88
  -6   0  -7   -0.70    0.82
   6   0   8 2038.31  140.00
   6   0   8 1883.90  133.46
   6   0   8 1837.06  121.00
  -6   0  -8 1872.78  123.44
  -6   0  -8 2019.35  137.68
  -6   0  -8 1990.64  137.73
  -6   0  -8 2041.48  136.81
   6   0   9    1.18    1.20
   6   0   9    0.49    0.71
   6   0   9    1.74    1.24
  -6   0  -9    1.37    1.01
  -6   0  -9    0.49    0.72
  -6   0  -9    1.62    1.08
  -6   0  -9    1.49    1.07
   6   0  10  688.50   40.26
   6   0  10  646.18   41.34
  -6   0 -10  722.43   40.96
  -6   0 -10  681.60   44.71
  -6   0 -10  694.86   38.75
   6   0  11    0.48    1.24
   6   0  11    0.33    1.17
  -6   0 -11   -0.19    0.96
  -6   0 -11    1.25    1.04
   6   0  12    9.92    2.74
   6   0  12    7.60    2.80
  -6   0 -12   11.40    2.34
   6   0  13    2.57    1.82
   6   0  13    1.65    1.68
  -6   0 -13    0.36    1.32
   6   0  14   39.86    5.22
   6   0  14   35.20    8.72
  -6   0 -14   34.76    6.58
   6   0  15    0.04    1.70
   6   0  15    0.30    1.80
  -6   0 -15   -1.84    1.32
   6   0  16    4.48    2.89
   6   0  16    6.40    2.72
   6   0  17    2.01    1.74
   6   0  17   -0.50    1.88
   6   0  18    2.88    2.87
   6   0  18    8.48    2.80
   6   0  19   -1.53    2.39
   6   0  19    0.90    1.42
   6   0  20    4.41    2.08
   6   0  20    1.50    2.01
   6   0  21    0.35    1.18
   6   0  21    1.57    1.49
   6   0  22   31.70    4.01
   6   2 -26   51.14    4.55
  -6   2  26   53.18    6.53
  -6  -2  26   28.89    2.92
  -6   2  25    1.39    2.59
  -6  -2  25    2.17    1.61
  -6  -2  25    0.89    1.34
  -6   2  24    3.07    2.98
  -6  -2  24    1.02    1.64
  -6  -2  24    3.80    2.96
  -6   2  23   15.86    3.15
   6  -2 -23    1.91    2.93
  -6  -2  23   14.82    3.13
  -6  -2  23    7.77    3.19
  -6   2  22   40.19    5.57
   6  -2 -22   32.66    5.12
  -6  -2  22   32.51    5.52
  -6  -2  22   37.75    5.31
  -6   2  21   73.19    7.80
   6  -2 -21   65.29    7.90
  -6  -2  21   78.27    7.57
  -6  -2  21   66.38    7.80
  -6   2  20    2.74    1.87
  -6   2  20    1.33    2.04
  -6  -2  20    0.82    1.91
  -6  -2  20    3.46    3.38
  -6   2  19  107.71   13.67
  -6   2  19  114.89    9.14
  -6  -2  19   96.45    8.80
  -6  -2  19  101.90   10.21
  -6   2  18   52.45    5.62
  -6   2  18   54.05    6.16
  -6  -2  18   39.54    6.24
  -6  -2  18   46.31    8.52
  -6   2  17   37.46    4.73
  -6   2  17   37.13    5.24
  -6  -2  17   35.74    5.26
  -6  -2  17   34.41    4.62
  -6   2  16    1.46    1.66
  -6   2  16    0.88    1.47
  -6  -2  16    1.12    1.41
  -6  -2  16    1.50    1.70
  -6   2  15   78.44    6.20
  -6   2  15   82.64    6.83
  -6  -2  15   61.64    5.68
  -6  -2  15   69.68    6.76
   6   2 -14    1.31    1.15
  -6   2  14    1.96    1.29
   6   2 -14    1.38    1.09
  -6   2  14    0.74    1.39
   6  -2 -14    0.19    1.50
  -6  -2  14   -0.16    2.26
   6  -2 -14    0.19    1.12
  -6  -2  14    1.26    1.89
   6   2 -13  277.95   14.84
  -6   2  13  284.24   13.55
   6   2 -13  323.95   13.59
  -6   2  13  323.12   14.68
   6   2 -13  320.93   19.97
  -6   2  13  303.43   16.98
  -6   2  13  316.16   17.36
   6  -2 -13  245.33   10.69
   6  -2 -13  278.58   15.07
  -6  -2  13  304.58   18.29
  -6  -2  13  323.30   13.74
   6  -2 -13  275.86   12.60
   6  -2 -13  305.08   18.39
  -6  -2  13  287.33   19.21
   6   2 -12  570.39   26.64
  -6   2  12  604.71   32.40
  -6   2  12  546.18   28.32
   6   2 -12  537.24   29.30
  -6   2  12  574.50   32.26
  -6   2  12  647.59   31.11
   6  -2 -12  607.25   26.24
  -6  -2  12  609.01   28.87
   6  -2 -12  499.40   21.94
   6  -2 -12  564.32   29.78
  -6  -2  12  583.52   34.16
  -6  -2  12  545.84   33.49
   6  -2 -12  602.39   39.86
   6   2 -11  684.94   36.59
   6   2 -11  683.24   34.13
   6   2 -11  654.14   27.24
  -6   2  11  684.62   35.77
  -6   2  11  660.03   35.11
  -6   2  11  611.27   30.69
  -6   2  11  653.74   36.72
   6  -2 -11  696.71   32.74
  -6  -2  11  672.00   33.05
   6  -2 -11  556.74   24.37
   6  -2 -11  665.64   38.56
   6  -2 -11  661.52   34.54
  -6  -2  11  667.15   38.43
  -6  -2  11  639.30   26.89
  -6  -2  11  642.41   38.09
   6   2 -10  119.70    5.16
   6   2 -10  115.12    3.54
   6   2 -10  131.38    7.12
  -6   2  10  106.44    5.31
  -6   2  10  105.20    7.16
  -6   2  10  100.87    4.87
  -6   2  10  104.63    5.98
   6  -2 -10  101.58    7.41
  -6  -2  10  111.48   10.33
   6  -2 -10  119.47    5.93
   6  -2 -10  106.36    6.01
  -6  -2  10  117.15    6.24
  -6  -2  10  111.91    6.97
  -6  -2  10  103.61    3.43
   6   2  -9 1276.24   60.12
  -6   2   9 1325.08   78.03
   6   2  -9 1532.91   90.37
   6   2  -9 1364.18   75.91
  -6   2   9 1253.91   72.83
  -6   2   9 1368.50   80.29
  -6   2   9 1313.19   80.75
  -6   2   9 1341.82   68.57
   6  -2  -9 1131.22   57.20
  -6  -2   9 1434.01   70.81
   6  -2  -9 1358.97   84.43
   6  -2  -9 1364.83   77.32
  -6  -2   9 1311.96   64.72
  -6  -2   9 1168.45   67.59
   6  -2  -9 1304.18   75.63
  -6  -2   9 1249.79   60.19
  -6  -2   9 1390.48   79.76
  -6  -2   9 1307.71   80.51
   6   2  -8  215.70    8.72
   6   2  -8  217.97   10.83
   6   2  -8  189.47    4.86
   6   2  -8  181.71    8.02
  -6   2   8  230.07    9.38
  -6   2   8  232.42    7.09
  -6   2   8  223.24    9.51
  -6   2   8  217.64   10.83
  -6   2   8  217.10    9.29
  -6  -2   8  216.20    9.07
  -6  -2   8  191.64    8.24
  -6  -2   8  213.53    6.88
  -6  -2   8  211.66   10.57
  -6  -2   8  212.86    5.57
  -6  -2   8  227.92    7.71
   6  -2  -8  217.12    9.26
   6  -2  -8  224.61    9.44
   6  -2  -8  205.61    8.17
   6  -2  -8  217.19   11.34
   6   2  -7    4.55    1.22
  -6   2   7    2.88    0.97
  -6   2   7    2.72    1.22
   6   2  -7    2.31    0.84
   6   2  -7    3.26    0.14
  -6   2   7    4.42    0.91
   6  -2  -7    1.58    1.30
   6  -2  -7    1.85    0.89
  -6  -2   7    4.65    0.84
   6  -2  -7    2.45    1.50
  -6  -2   7    5.83    0.84
  -6  -2   7    2.88    1.15
  -6  -2   7    3.62    0.63
  -6   2   6  495.96   21.12
  -6   2   6  486.09   23.16
   6   2  -6  477.35   20.66
   6   2  -6  504.32   23.77
  -6   2   6  484.93   21.13
  -6   2   6  458.32   21.56
   6  -2  -6  469.72   26.04
   6  -2  -6  479.56   21.87
  -6  -2   6  416.95   13.94
  -6  -2   6  464.19   21.84
  -6  -2   6  454.91   14.17
   6  -2  -6  480.55   20.79
  -6  -2   6  468.84   20.37
  -6  -2   6  465.48   19.93
  -6  -2   6  488.83   20.48
   6   2  -5 1309.63   76.74
  -6   2   5 1396.91   76.16
   6   2  -5 1285.51   75.14
  -6   2   5 1283.08   75.85
  -6   2   5 1420.92   81.58
   6   2  -5 1378.35   75.29
  -6   2   5 1370.18   75.90
   6  -2  -5 1422.03   82.03
   6  -2  -5 1406.64   80.83
  -6  -2   5 1272.73   69.08
  -6  -2   5 1382.10   76.71
   6  -2  -5 1423.22   78.40
   6  -2  -5 1344.78   74.23
  -6  -2   5 1403.04   68.09
  -6  -2   5 1282.86   73.74
  -6  -2   5 1368.75   76.79
  -6  -2   5 1276.15   60.15
  -6   2   4   26.15    2.98
   6   2  -4   26.24    2.37
   6   2  -4   26.18    1.87
  -6   2   4   26.71    2.35
   6   2  -4   26.70    2.53
  -6   2   4   26.98    2.02
  -6   2   4   27.19    2.58
   6  -2  -4   26.80    4.04
   6  -2  -4   28.52    2.24
   6  -2  -4   23.35    2.61
  -6  -2   4   25.56    0.99
  -6  -2   4   36.33    2.26
  -6  -2   4   27.98    2.35
  -6  -2   4   24.80    2.42
  -6  -2   4   25.75    1.00
  -6  -2   4   27.54    2.04
   6  -2  -4   30.01    3.44
  -6   2   3 3265.35  246.56
   6   2  -3 3435.90  255.77
   6   2  -3 3556.09  249.81
   6   2  -3 3631.74  264.19
  -6   2   3 2474.35  162.91
  -6   2   3 3197.59  233.35
  -6   2   3 3269.34  241.55
  -6   2   3 3329.19  252.45
   6  -2  -3 3262.46  235.95
   6  -2  -3 2841.14  188.64
  -6  -2   3 2912.35  201.77
   6  -2  -3 3441.24  249.15
  -6  -2   3 3432.22  244.86
  -6  -2   3 3441.63  249.12
  -6  -2   3 2692.61  188.33
   6  -2  -3 3497.59  260.41
  -6  -2   3 3313.22  240.81
   6  -2  -3 3471.20  252.53
  -6  -2   3 3419.27  255.30
  -6   2   2   91.69    7.04
   6   2  -2   84.16    4.51
  -6   2   2   89.03    4.62
   6   2  -2   85.48    4.85
   6   2  -2   95.70    3.84
  -6   2   2   95.00    4.70
  -6   2   2   85.55    6.22
  -6   2   2   98.35    4.88
  -6   2   2   92.67    2.69
   6  -2  -2   85.44    5.71
  -6  -2   2   85.11    3.90
   6  -2  -2   88.78    2.95
   6  -2  -2  105.00    4.78
  -6  -2   2   95.84    7.22
  -6  -2   2   90.84    3.72
   6  -2  -2   88.67    4.14
  -6  -2   2   94.61    5.13
  -6  -2   2   86.92    4.12
  -6  -2   2   89.41    5.85
  -6  -2   2   98.50    4.39
   6   2  -1 1153.07   56.63
   6   2  -1 1011.46   52.39
  -6   2   1 1184.00   57.28
  -6   2   1 1110.58   58.45
   6   2  -1 1028.72   54.76
  -6   2   1 1100.05   56.32
  -6   2   1 1128.87   58.78
  -6   2   1 1060.07   55.36
  -6   2   1 1035.21   59.42
   6  -2  -1 1103.02   54.16
  -6  -2   1 1211.13   61.57
  -6  -2   1  834.87   48.65
  -6  -2   1 1199.09   59.47
   6  -2  -1 1082.45   55.42
  -6  -2   1 1145.27   60.88
  -6  -2   1 1161.53   70.05
  -6  -2   1 1017.03   52.27
   6  -2  -1 1109.74   61.29
   6  -2  -1 1102.87   55.02
  -6  -2   1 1154.60   59.37
   6   2   0  176.45    6.92
  -6   2   0  169.76   11.91
   6   2   0  176.21    7.36
  -6   2   0  190.62    6.53
   6   2   0  166.80    6.48
   6   2   0  188.07    7.67
  -6   2   0  184.64    6.81
  -6   2   0  185.68    8.27
   6   2   0  174.65    6.63
  -6   2   0  202.35    8.21
  -6  -2   0  177.95    6.96
   6  -2   0  163.17    6.69
  -6  -2   0  172.92    9.03
   6  -2   0  183.63    7.78
   6  -2   0  173.08    8.63
  -6  -2   0  172.63    6.97
  -6  -2   0  178.96    8.11
   6  -2   0  172.38    6.85
  -6  -2   0  171.28    7.33
   6  -2   0  177.10    6.76
   6   2   1  245.85   10.05
   6   2   1  231.88    8.91
  -6   2  -1  231.62   11.18
  -6   2  -1  222.38    8.44
  -6   2  -1  229.46    9.78
   6   2   1  234.90    8.65
   6   2   1  252.24    9.34
   6   2   1  231.81    9.19
  -6   2  -1  215.10    9.17
   6  -2   1  251.09   10.17
   6  -2   1  235.74    8.51
   6  -2   1  218.53   11.60
  -6  -2  -1  263.04   11.17
  -6  -2  -1  233.69   11.42
  -6  -2  -1  229.79   10.67
   6  -2   1  229.59   10.34
  -6  -2  -1  252.42   10.55
   6  -2   1  222.81    8.50
  -6  -2  -1  238.91   12.62
   6  -2   1  240.97    9.76
   6   2   2 1627.83   97.79
   6   2   2 1642.02   93.61
   6   2   2 1672.09   96.23
  -6   2  -2 1675.65  104.81
   6   2   2 1627.58   93.88
  -6   2  -2 1679.05   97.21
   6   2   2 1717.41   98.92
  -6   2  -2 1637.73   92.20
  -6   2  -2 1665.17   99.47
   6  -2   2 1528.33   92.94
   6  -2   2 1565.41   89.23
  -6  -2  -2 1705.13  104.38
   6  -2   2 1584.61   96.13
   6  -2   2 1628.58   98.42
   6  -2   2 1632.23   95.32
   6  -2   2 1698.30   94.89
  -6  -2  -2 1863.33  104.88
  -6  -2  -2 1662.63   97.69
  -6  -2  -2 1659.07   99.01
  -6   2  -3 1026.97   59.06
   6   2   3 1039.07   52.05
  -6   2  -3 1031.48   50.40
   6   2   3  870.72   43.74
   6   2   3  984.10   52.40
   6   2   3  890.51   44.87
  -6   2  -3 1165.38   57.62
  -6   2  -3  932.54   49.37
   6  -2   3  943.78   45.07
  -6  -2  -3 1006.49   50.20
   6  -2   3  960.88   51.78
   6  -2   3 1000.17   46.68
   6  -2   3  943.96   52.45
   6  -2   3  890.55   51.18
  -6  -2  -3  982.06   54.20
  -6  -2  -3  975.47   50.35
  -6  -2  -3  965.41   50.27
   6   2   4  399.86   18.62
  -6   2  -4  427.08   20.47
   6   2   4  444.34   19.60
   6   2   4  398.42   19.06
  -6   2  -4  446.82   20.06
   6   2   4  439.26   21.00
  -6   2  -4  447.12   20.86
  -6   2  -4  339.18   15.35
   6  -2   4  396.65   16.04
   6  -2   4  444.08   19.50
   6  -2   4  437.37   16.04
   6  -2   4  435.16   21.21
   6  -2   4  376.58   18.33
  -6  -2  -4  393.16   20.52
  -6  -2  -4  450.91   17.50
  -6  -2  -4  426.16   19.34
  -6  -2  -4  386.21   17.91
   6   2   5  260.52   11.48
  -6   2  -5  296.81   17.74
  -6   2  -5  274.58   10.94
   6   2   5  300.77   14.23
   6   2   5  254.93   11.94
  -6   2  -5  359.24   16.02
   6   2   5  306.48   15.69
  -6   2  -5  325.22   16.16
   6  -2   5  298.47   10.64
   6  -2   5  305.02   16.03
   6  -2   5  335.25   14.55
  -6  -2  -5  268.77   13.23
   6  -2   5  336.12   11.59
   6  -2   5  286.59   14.75
  -6  -2  -5  307.75   14.34
  -6  -2  -5  290.24   16.45
  -6  -2  -5  325.51   12.03
  -6   2  -6   23.50    2.38
  -6   2  -6   19.91    2.27
   6   2   6   15.84    1.80
   6   2   6   19.46    2.85
  -6   2  -6   15.46    1.24
   6   2   6   22.79    2.46
  -6   2  -6   20.18    2.67
   6  -2   6   19.81    1.87
  -6  -2  -6   21.07    2.12
  -6  -2  -6   17.52    2.18
  -6  -2  -6   17.56    1.02
   6  -2   6   20.36    2.66
   6  -2   6   22.35    2.96
  -6  -2  -6   19.52    4.78
   6   2   7   85.93    8.64
   6   2   7   97.45    5.68
  -6   2  -7   75.24    4.68
  -6   2  -7   78.65    5.55
  -6   2  -7   67.28    3.17
   6   2   7   70.41    4.26
  -6   2  -7   81.55    5.18
   6  -2   7   71.67    5.42
   6  -2   7   79.07    4.21
  -6  -2  -7   88.18    4.96
   6  -2   7   77.79    6.15
  -6  -2  -7   76.20    4.03
  -6  -2  -7   76.75    4.86
  -6  -2  -7   76.79    6.31
   6   2   8   39.87    3.63
  -6   2  -8   36.78    3.60
  -6   2  -8   32.66    3.14
  -6   2  -8   29.65    1.94
   6   2   8   38.96    3.94
   6   2   8   31.97    4.04
  -6   2  -8   32.94    2.83
   6  -2   8   31.19    2.19
   6  -2   8   32.87    3.55
   6  -2   8   34.36    4.04
  -6  -2  -8   34.55    3.23
  -6  -2  -8   31.71    4.07
  -6  -2  -8   36.53    2.89
  -6  -2  -8   31.96    2.44
   6   2   9  188.09   11.10
  -6   2  -9  143.90    8.57
  -6   2  -9  175.42   10.22
  -6   2  -9  163.43    9.22
   6   2   9  153.37   11.40
   6   2   9  173.24   13.89
   6  -2   9  148.74    6.93
   6  -2   9  161.79    9.95
   6  -2   9  156.52   15.34
  -6  -2  -9  167.82    8.68
  -6  -2  -9  155.52    8.05
  -6  -2  -9  168.05    9.44
   6   2  10  591.70   40.95
  -6   2 -10  871.50   48.43
   6   2  10  761.12   44.78
   6  -2  10  626.51   38.73
  -6  -2 -10  774.77   43.63
  -6  -2 -10  687.66   44.34
   6  -2  10  672.09   44.77
  -6  -2 -10  624.07   35.51
  -6  -2 -10  604.47   33.90
   6   2  11   57.60    5.46
   6   2  11   76.42    6.37
   6  -2  11   55.63    5.85
   6  -2  11   56.90   10.37
  -6  -2 -11   67.68    6.63
   6   2  12   28.22    4.08
   6   2  12   20.38    3.53
   6  -2  12   25.03    4.85
   6  -2  12   24.83    4.04
  -6  -2 -12   30.46    6.74
   6   2  13   -1.02    1.40
   6   2  13   -0.81    1.58
   6  -2  13    0.20    1.57
  -6  -2 -13   -1.10    1.63
   6   2  14   60.77    6.53
   6   2  14   34.64    6.14
   6  -2  14   52.98    7.48
   6  -2  14   56.78    6.31
  -6  -2 -14   48.56    9.81
   6   2  15   18.95    4.88
   6   2  15   38.06    5.10
   6  -2  15   30.57    5.10
   6  -2  15   26.88    5.89
  -6  -2 -15   36.28    5.34
   6   2  16   43.50    5.94
   6  -2  16   35.73    6.89
   6  -2  16   47.84    6.13
  -6  -2 -16   39.44    5.46
   6   2  17    3.69    2.10
   6  -2  17    2.75    2.25
   6  -2  17    0.94    2.50
  -6  -2 -17   -0.36    3.01
   6   2  18    6.79    2.47
   6  -2  18    6.20    2.57
   6  -2  18    4.33    2.75
  -6  -2 -18    0.74    2.08
   6   2  19   58.22    5.97
   6  -2  19   51.19    6.19
   6  -2  19   38.68    6.52
  -6  -2 -19   38.68    5.04
   6   2  20    4.51    2.69
   6  -2  20    0.03    1.88
   6  -2  20    4.13    1.77
  -6  -2 -20   -0.08    1.17
  -6   2 -21    0.10    1.50
   6   2  21    0.72    2.20
   6  -2  21    1.42    1.41
  -6   4  25    2.80    1.47
  -6  -4  25    0.92    1.27
   6   4 -24    0.01    2.37
  -6   4  24   14.40    4.01
  -6  -4  24   12.94    3.68
   6  -4 -24   16.33    4.01
  -6   4  23   20.27    6.10
   6   4 -23   24.13    3.96
   6  -4 -23   18.83    6.48
  -6  -4  23   20.16    3.65
   6   4 -22    4.61    2.59
  -6   4  22    4.43    4.23
   6  -4 -22    9.66    4.57
  -6  -4  22    6.59    2.60
  -6   4  21   48.21    6.27
   6   4 -21   46.36    6.24
   6  -4 -21   45.89    7.01
  -6  -4  21   47.15    6.41
   6   4 -20   10.08    3.63
  -6   4  20   12.91    3.80
  -6   4  20   16.20    3.80
  -6  -4  20   13.72    3.97
   6   4 -19   36.17    5.93
  -6   4  19   46.28    6.49
  -6   4  19   47.56    6.14
  -6  -4  19   39.08    6.53
   6   4 -18   24.84    5.67
  -6   4  18   51.01    6.27
  -6   4  18   52.59    6.62
  -6  -4  18   52.61   10.24
  -6   4  17    3.12    2.30
  -6   4  17    2.60    2.25
  -6  -4  17    1.34    2.27
  -6  -4  17    2.03    1.91
  -6   4  16   47.30    6.00
  -6   4  16   49.19    6.29
  -6  -4  16   37.30    6.36
  -6  -4  16   38.84    5.13
  -6   4  15    1.50    3.27
  -6   4  15    0.33    3.18
  -6  -4  15    2.30    1.66
  -6  -4  15    2.21    2.08
  -6   4  14   27.57    4.01
  -6   4  14   26.41    4.16
   6  -4 -14   20.74    2.89
  -6  -4  14   23.58    3.53
  -6  -4  14   26.73    4.38
  -6   4  13   46.94    4.81
  -6   4  13   42.99    5.24
   6  -4 -13   42.94    3.86
  -6  -4  13   44.57    5.36
  -6  -4  13   42.02    4.41
   6   4 -12   90.87    5.56
   6   4 -12   85.47    7.07
  -6   4  12   95.98    7.62
  -6   4  12   95.81    7.03
   6  -4 -12  102.30    6.38
   6  -4 -12   99.26    5.87
  -6  -4  12   91.63    8.29
  -6  -4  12   93.25    7.76
   6   4 -11    3.04    1.66
   6   4 -11    3.32    1.18
   6   4 -11    2.72    1.64
  -6   4  11    2.81    1.50
  -6   4  11    2.76    1.82
   6  -4 -11    2.75    1.69
   6  -4 -11    3.86    1.35
   6  -4 -11    2.24    1.98
   6  -4 -11    2.08    1.34
  -6  -4  11    4.52    1.25
  -6  -4  11    6.10    1.80
  -6   4  10   89.02    9.37
   6   4 -10   84.13    5.11
   6   4 -10   98.04    6.38
   6   4 -10   82.98    6.27
  -6   4  10   87.66    6.14
   6  -4 -10   91.96    7.71
   6  -4 -10   89.32    7.21
  -6  -4  10   83.40    6.01
  -6  -4  10   79.79    5.15
  -6  -4  10   80.28    4.43
  -6  -4  10   86.58    6.61
   6  -4 -10   85.74    6.40
  -6   4   9  737.45   44.07
   6   4  -9  803.06   45.75
   6   4  -9  775.12   40.97
   6   4  -9  800.82   46.00
  -6   4   9  785.38   44.04
   6   4  -9  732.90   40.65
  -6   4   9  784.11   46.02
   6  -4  -9  755.77   46.15
   6  -4  -9  768.38   43.51
  -6  -4   9  684.04   38.70
  -6  -4   9  804.58   47.06
   6  -4  -9  702.19   42.13
  -6  -4   9  688.25   39.34
   6   4  -8  238.00   16.24
   6   4  -8  237.05   15.67
  -6   4   8  230.55   12.33
   6   4  -8  224.09   11.09
  -6   4   8  234.14   13.65
   6   4  -8  237.64   11.88
  -6   4   8  244.84   14.16
   6  -4  -8  210.04   12.31
   6  -4  -8  249.91   12.93
   6  -4  -8  212.52   13.00
  -6  -4   8  237.67   12.32
  -6  -4   8  221.91   11.70
  -6  -4   8  235.38   13.23
   6   4  -7 1126.53   66.47
   6   4  -7 1024.48   61.10
   6   4  -7 1024.36   60.73
   6   4  -7 1061.08   64.90
  -6   4   7 1151.75   71.73
  -6   4   7 1201.29   71.71
  -6   4   7 1063.72   68.46
   6  -4  -7 1058.38   65.31
  -6  -4   7 1135.82   73.65
   6  -4  -7 1041.26   65.35
  -6  -4   7 1051.47   67.88
   6  -4  -7 1129.54   67.19
  -6  -4   7 1064.87   65.44
   6   4  -6 1152.63   72.60
   6   4  -6 1252.20   75.70
   6   4  -6 1297.07   77.49
   6   4  -6 1226.21   74.26
  -6   4   6 1229.59   75.91
  -6   4   6 1251.78   87.69
  -6   4   6 1247.45   75.30
   6  -4  -6 1246.24   77.26
   6  -4  -6 1205.66   75.63
   6  -4  -6 1290.96   78.26
  -6  -4   6 1146.02   70.55
  -6  -4   6 1197.69   81.90
  -6  -4   6 1283.10   77.30
   6   4  -5   33.51    3.30
   6   4  -5   37.74    3.30
   6   4  -5   31.73    2.94
  -6   4   5   29.12    3.14
   6   4  -5   31.18    3.26
  -6   4   5   35.28    4.15
  -6   4   5   32.81    3.11
   6  -4  -5   30.50    3.59
   6  -4  -5   28.62    3.17
   6  -4  -5   30.78    3.48
   6  -4  -5   28.74    4.51
  -6  -4   5   27.27    3.63
  -6  -4   5   35.93    3.33
  -6  -4   5   37.06    2.88
   6   4  -4  887.06   50.80
   6   4  -4  770.01   43.90
   6   4  -4  855.35   48.59
   6   4  -4  813.93   45.90
  -6   4   4  888.84   47.78
  -6   4   4  815.77   44.48
  -6   4   4  780.83   48.60
   6  -4  -4  899.05   51.45
   6  -4  -4  848.50   51.94
   6  -4  -4  835.70   47.91
  -6  -4   4  769.71   33.50
  -6  -4   4  766.24   35.09
   6  -4  -4  808.09   49.09
  -6  -4   4  926.27   47.88
  -6  -4   4  840.63   51.31
  -6  -4   4  791.35   53.81
   6  -4  -4  821.83   45.24
   6   4  -3  211.11   10.29
  -6   4   3  202.65    9.45
   6   4  -3  213.57   11.95
   6   4  -3  213.56    9.95
   6   4  -3  202.67   10.87
  -6   4   3  201.55   10.82
  -6   4   3  194.08    5.42
  -6   4   3  204.00   13.41
  -6   4   3  186.76   12.59
   6  -4  -3  215.46   11.43
   6  -4  -3  204.08    9.30
   6  -4  -3  200.34   12.75
   6  -4  -3  189.42   10.13
  -6  -4   3  222.24   11.50
  -6  -4   3  182.85    7.03
  -6  -4   3  205.84   12.68
  -6  -4   3  202.94    7.91
  -6  -4   3  223.24   11.16
  -6   4   2  575.48   30.13
  -6   4   2  565.84   27.23
  -6   4   2  532.44   28.44
  -6   4   2  551.48   33.07
  -6   4   2  588.05   23.16
   6   4  -2  548.74   29.36
   6   4  -2  624.28   29.75
   6   4  -2  538.65   27.85
   6  -4  -2  549.28   22.50
   6  -4  -2  608.96   28.21
  -6  -4   2  593.70   27.16
   6  -4  -2  555.68   29.74
   6  -4  -2  550.87   28.44
   6  -4  -2  551.80   32.67
  -6  -4   2  517.52   31.96
  -6  -4   2  558.62   26.52
  -6  -4   2  553.23   29.43
  -6  -4   2  544.45   25.34
  -6  -4   2  590.07   31.64
   6   4  -1    1.62    1.02
  -6   4   1    2.10    1.80
  -6   4   1    4.63    1.33
  -6   4   1    2.95    0.78
   6   4  -1    1.12    1.24
  -6   4   1    4.00    2.20
  -6   4   1    3.13    0.54
   6   4  -1    0.90    0.99
   6  -4  -1    0.94    1.13
  -6  -4   1    2.76    0.88
   6  -4  -1    1.60    1.68
  -6  -4   1    0.84    1.25
   6  -4  -1    2.58    0.97
   6  -4  -1    2.54    1.31
   6  -4  -1    2.54    0.72
  -6  -4   1    1.62    1.24
  -6  -4   1    0.94    1.47
  -6  -4   1    1.50    0.90
  -6  -4   1    0.39    2.86
  -6  -4   1    2.60    0.77
  -6   4   0  929.46   60.15
   6   4   0 1042.62   56.84
  -6   4   0  940.47   54.87
  -6   4   0  938.87   50.98
   6   4   0 1028.90   54.99
   6   4   0 1064.14   57.85
  -6   4   0  911.70   54.52
  -6   4   0 1046.05   52.71
   6  -4   0  958.54   59.01
  -6  -4   0  979.76   55.82
   6  -4   0  968.98   54.66
   6  -4   0 1081.25   55.09
   6  -4   0  913.80   49.39
   6  -4   0 1021.28   62.53
  -6  -4   0 1058.85   66.29
  -6  -4   0 1013.42   57.75
  -6  -4   0  955.56   55.57
  -6  -4   0  947.98   57.32
  -6   4  -1   34.18    7.36
   6   4   1   46.63    3.11
   6   4   1   41.13    2.40
  -6   4  -1   42.82    2.36
  -6   4  -1   43.38    3.86
   6   4   1   41.32    2.75
   6   4   1   41.05    4.58
  -6   4  -1   40.36    3.95
  -6   4  -1   39.94    2.02
   6  -4   1   40.50    2.77
   6  -4   1   39.14    3.38
  -6  -4  -1   49.54    4.33
  -6  -4  -1   49.96    5.28
   6  -4   1   46.17    1.92
   6  -4   1   40.99    4.15
   6  -4   1   43.11    3.18
  -6  -4  -1   41.31    3.54
  -6  -4  -1   42.18    3.44
  -6  -4  -1   39.23    3.45
   6   4   2  394.09   19.02
   6   4   2  452.07   22.12
  -6   4  -2  421.91   25.40
  -6   4  -2  413.93   16.71
   6   4   2  480.63   22.58
  -6   4  -2  429.00   19.65
  -6   4  -2  427.23   22.68
   6   4   2  441.95   19.63
  -6   4  -2  393.53   22.23
   6  -4   2  427.14   21.62
  -6  -4  -2  437.64   23.22
   6  -4   2  435.72   23.67
   6  -4   2  393.82   20.14
  -6  -4  -2  417.13   21.72
   6  -4   2  408.36   16.21
  -6  -4  -2  432.53   23.04
   6  -4   2  415.97   20.30
  -6  -4  -2  407.79   25.75
  -6  -4  -2  443.86   22.05
   6   4   3  227.39    9.77
   6   4   3  237.89   14.37
  -6   4  -3  222.44   16.50
  -6   4  -3  234.53   14.60
   6   4   3  263.81   12.93
  -6   4  -3  245.47   13.22
   6   4   3  236.79   10.70
  -6   4  -3  251.80   11.63
  -6  -4  -3  245.73   11.93
   6  -4   3  241.65   13.03
   6  -4   3  234.43   12.32
  -6  -4  -3  229.35   11.98
  -6  -4  -3  216.88   12.44
   6  -4   3  213.28   10.83
   6  -4   3  227.10   10.75
  -6  -4  -3  233.37   13.24
   6   4   4  505.07   24.06
  -6   4  -4  619.22   33.39
   6   4   4  623.00   32.27
   6   4   4  498.23   24.38
   6   4   4  544.10   28.12
  -6   4  -4  512.45   28.72
  -6   4  -4  492.76   29.66
  -6   4  -4  563.25   33.03
   6  -4   4  563.16   34.63
   6  -4   4  577.30   30.31
  -6  -4  -4  518.07   32.12
  -6  -4  -4  540.02   29.71
   6  -4   4  555.48   29.55
  -6  -4  -4  560.92   28.65
  -6  -4  -4  542.47   31.85
   6  -4   4  517.63   29.35
   6   4   5   57.72    3.19
  -6   4  -5   70.77    4.18
   6   4   5   66.82    4.47
   6   4   5   59.34    3.27
  -6   4  -5   61.81    5.55
   6   4   5   73.65    5.16
  -6   4  -5   66.45    7.11
  -6   4  -5   65.64    5.44
   6  -4   5   55.37    3.44
   6  -4   5   71.75    7.49
  -6  -4  -5   71.46    4.85
  -6  -4  -5   62.18    5.57
   6  -4   5   57.09    3.36
  -6  -4  -5   69.34    4.01
  -6  -4  -5   56.25    4.59
   6  -4   5   61.65    4.38
   6   4   6   25.33    3.09
   6   4   6   19.90    1.80
  -6   4  -6   21.15    3.31
   6   4   6   24.56    2.72
   6   4   6   18.12    1.72
  -6   4  -6   24.85    4.63
  -6   4  -6   19.75    3.44
  -6   4  -6   27.65    2.45
   6  -4   6   20.93    3.20
  -6  -4  -6   22.36    4.14
   6  -4   6   20.18    1.82
  -6  -4  -6   22.61    2.10
   6  -4   6   23.33    2.44
   6  -4   6   19.63    2.49
  -6  -4  -6   17.57    4.12
  -6  -4  -6   19.26    3.52
  -6   4  -7    0.64    2.08
   6   4   7    0.64    1.08
  -6   4  -7    0.45    0.95
   6   4   7    1.17    1.27
  -6   4  -7    0.95    1.19
  -6   4  -7    2.03    1.39
   6  -4   7    0.57    2.03
   6  -4   7    0.95    0.87
  -6  -4  -7    0.81    1.47
  -6  -4  -7    0.37    1.06
  -6  -4  -7    0.28    1.03
  -6  -4  -7    0.06    0.73
   6   4   8  191.88   14.74
  -6   4  -8  173.17   11.43
   6   4   8  189.70   12.25
   6  -4   8  174.90   12.75
   6  -4   8  169.89   11.69
  -6  -4  -8  184.20   10.89
   6  -4   8  189.19   12.42
   6   4   9    4.23    1.96
   6   4   9    6.29    2.25
   6  -4   9    2.25    2.34
   6  -4   9    4.92    2.15
  -6  -4  -9    4.43    1.71
   6   4  10  174.47   11.98
   6  -4  10  157.50   13.06
   6  -4  10  158.22   11.98
  -6  -4 -10  165.06   13.85
  -6  -4 -10  158.47   10.92
   6   4  11  225.23   15.31
   6  -4  11  188.49   15.77
   6  -4  11  196.37   14.96
  -6  -4 -11  204.46   13.95
  -6  -4 -11  185.76   16.28
   6   4  12  230.40   16.36
   6  -4  12  208.05   17.42
   6  -4  12  224.97   16.36
  -6  -4 -12  201.95   17.63
   6   4  13  178.39   14.06
   6  -4  13  155.37   14.87
   6  -4  13  174.86   13.76
  -6  -4 -13  158.09   14.74
   6   4  14 1267.43   90.01
  -6   4 -14 1132.54   87.40
   6  -4  14 1006.93   93.55
  -6  -4 -14 1140.45   88.71
   6   4  15    5.23    2.68
  -6   4 -15    6.74    3.09
  -6  -4 -15    3.41    3.22
   6  -4  15    5.91    3.15
   6   4  16   64.91    6.91
  -6   4 -16   53.04    7.60
  -6  -4 -16   47.70   10.55
   6  -4  16   47.57   11.61
  -6   4 -17    5.01    2.86
   6   4  17    4.76    2.53
   6  -4  17    4.94    2.87
  -6  -4 -17    6.73    2.68
   6   4  18    8.58    2.80
  -6   4 -18    6.90    3.02
  -6  -4 -18    6.96    2.80
   6  -4  18    6.05    3.03
   6   4  19    0.43    1.15
  -6   4 -19   -0.42    1.27
  -6  -4 -19   -0.71    1.14
   6  -4  19    0.67    2.10
   6   4  20    5.52    1.81
  -6   4 -20    0.13    1.98
   6  -4  20    2.05    1.98
  -6  -4 -20    5.00    1.60
  -6   6  22    0.84    1.53
   6   6 -22    0.68    0.82
   6  -6 -22   -0.85    1.09
  -6  -6  22   -0.40    0.83
   6   6 -21   12.47    4.24
  -6   6  21   15.16    5.24
   6  -6 -21   16.88    3.72
  -6  -6  21   11.11    2.81
  -6   6  20    2.55    2.92
   6   6 -20    0.04    1.42
   6  -6 -20    2.02    1.96
  -6  -6  20    0.87    1.46
  -6   6  19   22.57    6.59
   6   6 -19   13.19    3.55
   6  -6 -19   21.22    4.52
  -6  -6  19   15.86    3.60
   6   6 -18   38.90    5.58
  -6   6  18   46.07    6.34
  -6   6  18   49.31    6.82
  -6  -6  18   41.56    5.67
   6   6 -17   -0.25    2.64
  -6   6  17    0.89    1.90
  -6   6  17    1.00    2.03
  -6  -6  17    1.37    1.64
   6   6 -16   50.18    6.42
  -6   6  16   62.56    7.10
  -6   6  16   64.31    7.19
  -6  -6  16   50.40    6.32
   6   6 -15   36.38    5.42
  -6   6  15   40.97    5.95
  -6   6  15   44.27    5.83
  -6  -6  15   39.19    5.30
  -6   6  14   27.01    4.48
   6   6 -14   17.16    6.57
  -6   6  14   25.81    4.53
   6  -6 -14   18.42    5.62
  -6  -6  14   26.43    4.14
  -6   6  13   25.64    4.46
   6   6 -13   21.94    4.26
  -6   6  13   29.41    4.52
   6  -6 -13   22.85    3.72
  -6  -6  13   26.17    4.10
   6  -6 -13   25.50    3.83
   6   6 -12    1.38    1.73
  -6   6  12    1.87    1.80
  -6   6  12    0.98    2.78
   6  -6 -12    1.59    1.56
   6  -6 -12    1.77    2.46
  -6  -6  12    1.20    1.62
  -6  -6  12    1.42    1.53
   6   6 -11    6.79    2.72
  -6   6  11    8.85    2.80
  -6   6  11   10.38    2.73
   6  -6 -11    9.27    2.59
  -6  -6  11    7.78    2.45
  -6  -6  11    4.90    2.36
   6  -6 -11   13.56    2.70
   6   6 -10    0.66    1.94
  -6   6  10   -0.79    1.27
  -6   6  10    0.55    1.25
   6  -6 -10    0.89    1.23
  -6  -6  10    0.66    1.12
  -6  -6  10   -0.25    1.14
   6  -6 -10    1.66    2.06
  -6   6   9   15.27    2.81
  -6   6   9    9.20    2.61
   6   6  -9    8.89    2.58
  -6  -6   9    9.66    2.18
  -6  -6   9    6.79    2.37
   6  -6  -9   11.53    2.77
   6  -6  -9   11.62    2.93
  -6  -6   9   13.36    2.53
   6   6  -8   10.76    4.13
  -6   6   8   13.53    4.14
  -6   6   8   16.66    2.79
  -6   6   8   10.76    3.44
  -6  -6   8   10.82    2.16
  -6  -6   8    7.00    4.12
   6  -6  -8   12.70    4.51
  -6  -6   8    8.68    3.95
   6   6  -7   63.78    5.54
  -6   6   7   75.31    5.67
  -6   6   7   73.66    6.15
  -6   6   7   68.03    7.57
  -6  -6   7   64.41    4.82
  -6  -6   7   69.86    6.08
   6  -6  -7   62.42    9.10
  -6  -6   7   64.48    6.00
  -6   6   6  101.26    6.63
   6   6  -6   91.19    6.70
  -6   6   6   97.13    9.12
   6   6  -6   90.28    6.69
  -6   6   6  103.67    7.64
   6  -6  -6   94.02   11.23
   6  -6  -6   92.30    9.13
  -6  -6   6  109.25    7.74
  -6  -6   6   88.59    7.34
  -6  -6   6  101.42    6.24
  -6   6   5  410.87   28.34
   6   6  -5  396.96   27.23
   6   6  -5  396.75   23.13
  -6   6   5  445.45   23.53
  -6   6   5  417.30   24.51
   6  -6  -5  442.05   24.52
  -6  -6   5  431.39   22.22
  -6  -6   5  420.05   25.99
   6  -6  -5  407.36   25.09
  -6  -6   5  383.76   24.08
   6   6  -4   33.64    4.95
   6   6  -4   33.77    3.53
  -6   6   4   24.28    4.89
  -6  -6   4   31.30    4.22
   6  -6  -4   26.30    4.12
  -6  -6   4   34.31    4.16
  -6  -6   4   31.80    2.69
   6   6  -3  480.87   27.62
   6   6  -3  498.73   27.58
  -6   6   3  480.61   33.16
   6  -6  -3  484.18   29.70
  -6  -6   3  513.23   37.12
  -6  -6   3  519.05   25.76
  -6  -6   3  493.92   30.05
   6   6  -2   41.93    3.96
  -6   6   2   41.98    5.97
   6  -6  -2   48.37    7.17
  -6  -6   2   43.13    5.09
  -6  -6   2   40.51    4.66
   6   6  -1   16.04    2.40
  -6   6   1   15.81    5.78
  -6   6   1   10.92    2.70
   6  -6  -1   13.54    2.84
  -6  -6   1   14.00    3.18
   6   6   0  148.10    8.70
  -6   6   0  131.82   11.63
  -6   6   0  130.83    9.28
   6  -6   0  126.98    9.39
  -6  -6   0  141.79    9.70
  -6  -6   0  145.39   10.63
   6   6   1  122.43    7.74
  -6   6  -1  106.17    8.40
  -6   6  -1  107.75   10.17
   6  -6   1  111.14    8.03
  -6  -6  -1  129.29    9.46
  -6  -6  -1  129.88    8.72
  -6   6  -2    4.73    2.27
   6   6   2    7.89    1.90
  -6   6  -2    5.11    2.76
  -6  -6  -2    4.56    2.94
  -6  -6  -2    8.07    2.46
   6  -6   2    3.95    3.02
  -6  -6  -2    3.12    1.99
  -6  -6  -2    8.34    2.10
  -6   6  -3  176.56   12.80
   6   6   3  201.65   14.93
  -6   6  -3  183.53   14.16
  -6  -6  -3  183.36   12.35
  -6  -6  -3  197.62   13.17
   6  -6   3  157.05   10.71
  -6  -6  -3  195.17   12.16
   6   6   4  305.33   21.54
  -6   6  -4  305.38   21.08
  -6   6  -4  308.80   20.17
   6  -6   4  279.16   17.56
  -6  -6  -4  295.07   19.50
  -6  -6  -4  299.32   19.34
  -6  -6  -4  311.30   22.64
  -6   6  -5   19.80    3.93
   6   6   5   19.03    3.16
  -6   6  -5   19.99    4.15
   6  -6   5   20.26    2.85
   6  -6   5   21.20    3.35
  -6  -6  -5   20.70    3.74
  -6  -6  -5   19.01    3.08
  -6  -6  -5   21.47    3.77
   6   6   6  206.23   13.04
  -6   6  -6  182.25   14.58
  -6   6  -6  201.01   15.50
  -6  -6  -6  211.98   13.82
  -6  -6  -6  208.39   13.91
  -6  -6  -6  199.53   15.06
   6  -6   6  204.79   14.04
  -6   6  -7   17.02    4.39
   6   6   7   26.37    3.66
  -6   6  -7   21.40    4.20
  -6  -6  -7   21.28    4.18
  -6  -6  -7   19.37    3.70
   6  -6   7   18.13    3.58
  -6  -6  -7   18.22    3.44
  -6   6  -8    0.93    2.13
   6   6   8    0.93    1.71
   6  -6   8    2.46    1.76
  -6  -6  -8    1.82    1.77
  -6  -6  -8    2.04    2.01
   6   6   9   73.25    6.90
  -6   6  -9   62.88    7.69
  -6  -6  -9   63.73    6.40
   6  -6   9   60.48    6.98
  -6  -6  -9   63.60    7.67
   6   6  10  117.33    9.67
  -6   6 -10   92.17   10.12
   6  -6  10   96.52    9.44
  -6  -6 -10  107.27   13.04
  -6  -6 -10  106.00   10.51
   6   6  11    1.00    2.49
  -6   6 -11    3.76    1.81
   6  -6  11   -0.55    1.59
  -6  -6 -11   -0.98    1.85
  -6  -6 -11    0.09    2.37
   6   6  12  238.94   16.35
  -6   6 -12  197.01   16.30
  -6  -6 -12  229.05   18.49
   6  -6  12  200.64   16.01
  -6  -6 -12  187.41   14.40
  -6   6 -13   14.66    3.83
   6   6  13   12.92    3.62
   6  -6  13    9.33    5.46
  -6  -6 -13   11.25    4.09
   6   6  14   61.70    6.86
  -6   6 -14   57.07   10.70
   6  -6  14   52.93    6.55
  -6  -6 -14   56.63   11.30
  -6   6 -15    4.93    2.59
   6   6  15    4.96    2.30
   6  -6  15    2.60    2.42
  -6  -6 -15    5.31    2.55
   6   6  16    8.25    2.70
  -6   6 -16   12.97    3.02
   6  -6  16    6.21    2.72
  -6  -6 -16   10.26    3.05
  -6   6 -17   -0.01    2.75
   6   6  17    1.00    1.61
   6  -6  17    2.76    1.60
  -6  -6 -17    3.09    1.77
   6   6  18   87.42    6.30
  -6   6 -18   75.30    6.92
   6  -6  18   69.15    6.13
  -6  -6 -18   79.20    6.83
  -6   8  18   35.31    4.22
   6   8 -18   22.32    4.59
   6  -8 -18   28.59    3.95
  -6  -8  18   25.01    2.83
   6   8 -17    3.69    1.53
  -6   8  17    4.82    2.38
   6  -8 -17    4.39    2.11
  -6  -8  17    3.40    1.33
   6   8 -16    5.91    1.97
  -6   8  16    8.29    2.95
   6  -8 -16    8.51    2.55
  -6  -8  16    6.59    1.81
  -6   8  15   21.17    4.05
   6   8 -15   14.47    2.95
   6  -8 -15   18.14    3.66
  -6  -8  15   16.95    2.63
  -6   8  14    3.68    2.33
   6   8 -14    3.31    1.86
   6  -8 -14    3.80    1.74
   6  -8 -14    3.31    1.74
   6  -8 -14    4.04    2.30
  -6  -8  14    2.48    1.53
   6   8 -13   44.38    5.28
  -6   8  13   54.49    5.93
   6  -8 -13   48.56    4.97
   6  -8 -13   42.74    6.10
   6  -8 -13   40.12    4.87
  -6  -8  13   45.15    4.43
   6   8 -12   36.68    4.66
  -6   8  12   39.39    5.43
  -6   8  12   44.07    4.68
   6  -8 -12   40.83    4.80
  -6  -8  12   35.60    3.99
  -6  -8  12   25.18    4.86
   6  -8 -12   32.12    4.75
   6   8 -11   22.40    3.80
  -6   8  11   32.30    4.49
  -6   8  11   28.35    3.72
   6  -8 -11   26.45    4.32
   6  -8 -11   26.52    4.03
  -6  -8  11   21.89    3.18
  -6  -8  11   18.67    4.09
   6   8 -10   10.20    2.81
  -6   8  10   13.80    3.19
   6  -8 -10   13.84    5.09
   6  -8 -10   10.18    2.97
  -6  -8  10   10.84    3.10
   6   8  -9   51.18    5.74
  -6   8   9   63.44    6.53
   6  -8  -9   45.69    6.04
   6  -8  -9   58.52    6.63
  -6  -8   9   43.27    5.95
   6   8  -8    2.13    1.81
  -6   8   8    2.52    2.18
   6  -8  -8    1.89    2.08
  -6  -8   8    2.75    1.98
   6  -8  -8    2.09    2.39
  -6  -8   8    2.84    1.89
  -6   8   7  294.74   25.72
   6   8  -7  252.54   22.00
   6  -8  -7  274.81   21.17
  -6  -8   7  246.42   19.12
  -6  -8   7  267.12   18.89
   6  -8  -7  276.03   20.31
   6   8  -6  386.79   25.21
  -6   8   6  423.36   28.69
   6  -8  -6  428.72   30.77
  -6  -8   6  371.10   26.73
   6  -8  -6  394.67   28.55
  -6  -8   6  420.36   34.42
  -6   8   5  271.08   18.84
   6   8  -5  271.85   23.19
   6  -8  -5  271.90   21.23
  -6  -8   5  246.16   18.52
  -6  -8   5  258.09   25.13
   6  -8  -5  260.45   19.51
   6   8  -4  119.75    8.58
   6  -8  -4   76.07    8.45
  -6  -8   4   72.19    8.41
  -6  -8   4   79.41    8.91
  -6   8   3    0.22    1.76
   6  -8  -3    1.13    1.26
  -6  -8   3   -0.63    2.09
  -6  -8   3   -0.92    1.35
  -6   8   2   17.12    5.10
  -6  -8   2   17.69    4.25
   6  -8  -2   13.95    5.99
  -6  -8   2   16.97    4.19
   6   8  -1  169.58   12.61
  -6   8   1  197.12   17.33
   6  -8  -1  168.54   13.89
  -6  -8   1  184.06   20.39
  -6  -8   1  188.73   14.62
   6   8   0   47.06    5.41
  -6   8   0   41.43    5.96
  -6   8   0   42.70   11.64
  -6  -8   0   50.20    6.57
  -6  -8   0   46.94    6.43
   6  -8   0   35.42    5.66
   6   8   1   45.08    7.68
  -6   8  -1   43.83   10.93
  -6   8  -1   35.27    8.85
   6  -8   1   33.98    5.83
  -6  -8  -1   46.94    6.40
  -6  -8  -1   49.50    6.52
   6   8   2   14.05    3.36
  -6   8  -2   20.81    3.64
  -6   8  -2   15.94    7.13
   6  -8   2   13.16    3.32
  -6  -8  -2   16.64    4.01
  -6  -8  -2   11.60    3.97
   6   8   3    4.75    2.17
  -6   8  -3   10.01    4.80
  -6   8  -3    6.01    4.11
   6  -8   3    3.95    2.29
  -6  -8  -3    5.00    2.70
  -6  -8  -3    5.73    2.91
  -6   8  -4  205.14   16.35
   6   8   4  202.99   13.57
  -6   8  -4  188.45   14.65
   6  -8   4  174.16   18.16
  -6  -8  -4  218.12   21.10
  -6  -8  -4  205.70   20.24
   6   8   5    9.67    3.93
  -6   8  -5    8.59    2.89
  -6   8  -5    8.57    3.25
   6  -8   5    5.26    2.54
  -6  -8  -5    7.10    2.64
  -6  -8  -5    9.15    2.95
   6   8   6    3.91    2.29
  -6   8  -6    3.06    2.50
  -6   8  -6    5.14    2.74
  -6  -8  -6    6.67    2.30
  -6  -8  -6    7.18    2.59
   6   8   7    1.81    1.30
  -6   8  -7    1.26    1.45
  -6  -8  -7   -0.34    1.19
  -6  -8  -7   -1.36    1.37
   6   8   8   43.43    5.13
  -6   8  -8   33.35    5.43
  -6  -8  -8   28.17    7.26
  -6  -8  -8   42.67    5.04
   6   8   9   19.21    3.67
  -6   8  -9   18.26    3.90
  -6  -8  -9   13.77    3.46
  -6  -8  -9   22.45    3.85
   6   8  10   18.62    5.95
  -6   8 -10   20.74    3.86
  -6  -8 -10   14.71    3.45
  -6  -8 -10   23.28    3.70
   6   8  11    0.64    2.07
  -6   8 -11   -0.81    1.33
  -6  -8 -11    0.58    1.12
  -6  -8 -11   -1.19    1.17
   6   8  12    1.18    1.27
  -6   8 -12    1.25    1.27
  -6  -8 -12   -0.48    0.94
  -6  -8 -12    0.13    1.73
   6   8  13    5.52    1.71
  -6   8 -13    4.80    2.74
  -6  -8 -13   -0.02    1.57
   6   8  14    0.86    1.42
  -6   8 -14    0.45    0.94
  -6  -8 -14   -0.44    0.84
  -6  10  11    0.65    1.22
   6 -10 -11   -0.04    1.09
   6 -10 -11    1.41    1.10
   6  10 -10    0.16    0.86
  -6  10  10    0.70    1.13
   6 -10 -10    0.81    1.10
  -6 -10  10    0.80    1.46
   6 -10 -10    0.05    1.08
   6  10  -9    0.02    1.29
  -6  10   9    2.20    1.65
   6 -10  -9    3.93    1.69
   6 -10  -9    5.44    1.69
  -6 -10   9    1.35    2.44
   6  10  -8   -0.03    1.52
  -6  10   8    0.33    1.24
   6 -10  -8    2.33    2.18
   6 -10  -8    1.48    2.18
  -6 -10   8    0.33    1.27
   6  10  -7    0.00    1.86
  -6  10   7    9.92    2.37
   6 -10  -7    9.15    3.91
  -6 -10   7    7.50    1.89
   6 -10  -7   12.66    2.57
  -6 -10   7    7.59    2.43
  -6  10   6   43.16    4.87
   6  10  -6   34.62    4.06
   6 -10  -6   51.03    8.26
  -6 -10   6   42.97    5.27
  -6 -10   6   43.35    4.49
   6 -10  -6   42.17    5.19
   6  10  -5   -0.04    4.33
  -6  10   5   21.42    3.60
   6 -10  -5   21.36    3.78
   6 -10  -5   22.31    3.69
  -6 -10   5   14.29    3.53
  -6 -10   5   20.74    3.19
   6 -10  -4   11.25    4.69
   6 -10  -4   14.09    3.21
  -6 -10   4   10.06    2.93
  -6 -10   4    2.04    4.36
   6 -10  -3   11.85    3.06
   6 -10  -3    7.78    2.94
  -6 -10   3    7.18    2.90
  -6 -10   3   11.81    4.32
   6 -10  -2   25.58    4.03
   6 -10  -2   17.75    3.79
  -6 -10   2   17.25    6.13
  -6 -10   2   21.11    6.03
   6 -10  -1   -0.29    1.46
   6 -10  -1    0.79    1.46
  -6 -10   1    0.76    1.44
  -6 -10   1    0.84    1.46
   6  10   0   20.89    2.84
  -6  10   0    0.46    5.95
   6 -10   0   21.05    3.78
  -6 -10   0   21.76    3.97
   6 -10   0   27.61    4.15
  -6 -10   0   26.32    4.05
   6  10   1    1.28    2.32
  -6  10  -1   -0.47    1.90
   6 -10   1    4.02    1.97
   6 -10   1    1.68    1.78
  -6 -10  -1    7.69    2.01
  -6 -10  -1    2.23    1.95
   6  10   2   -0.02    0.91
  -6  10  -2    0.04    1.17
   6 -10   2   -0.01    1.06
   6 -10   2    1.41    1.90
  -6 -10  -2   -0.39    1.20
  -6 -10  -2    1.38    1.26
  -6  10  -3    0.17    1.50
   6  10   3    0.04    0.76
   6 -10   3   -0.25    1.27
  -6 -10  -3   -2.33    1.48
  -6 -10  -3    0.63    1.04
   6 -10   3    0.33    0.88
   6  10   4   44.94    5.62
  -6  10  -4   40.28    4.40
   6 -10   4   37.26    3.93
   6 -10   4   19.05    4.74
  -6 -10  -4   34.87    4.04
  -6 -10  -4   41.90    4.64
   6  10   5    0.59    1.04
  -6  10  -5    0.05    1.19
  -6 -10  -5    1.01    1.39
  -6 -10  -5    0.53    1.03
   6  10   6    0.67    0.90
  -6  10  -6    0.06    0.99
  -6 -10  -6   -0.44    1.12
   7   1 -27   -0.00    1.13
  -7   1  27    0.69    1.06
  -7   1  26    2.93    1.77
  -7  -1  26    2.27    1.74
  -7   1  25   17.98    2.93
  -7  -1  25   11.67    4.47
  -7  -1  25    3.63    2.11
  -7   1  24   79.07    7.11
  -7  -1  24   51.51    6.40
  -7  -1  24   71.63    6.91
  -7   1  23  243.18   16.62
  -7  -1  23  230.74   16.05
  -7  -1  23  191.18   16.32
  -7   1  22   21.10    4.22
  -7  -1  22   24.30    6.25
  -7  -1  22   12.74    6.38
  -7   1  21  195.17   13.99
   7  -1 -21  151.09   13.51
  -7  -1  21  162.56   13.01
  -7  -1  21  162.38   14.06
  -7   1  20  296.49   19.94
  -7   1  20  301.79   19.71
  -7  -1  20  271.62   18.93
  -7  -1  20  276.95   20.87
  -7   1  19  420.32   27.12
  -7   1  19  434.84   26.64
  -7  -1  19  389.58   28.06
  -7  -1  19  392.05   25.83
  -7   1  18  183.62   13.09
  -7   1  18  195.61   12.47
  -7  -1  18  193.13   18.73
  -7  -1  18  185.25   16.84
  -7   1  17    8.38    2.50
  -7   1  17   11.37    2.18
  -7   1  17    5.63    2.10
  -7  -1  17    6.24    2.27
  -7  -1  17    6.03    2.55
   7  -1 -17    7.83    1.44
  -7   1  16  490.35   29.24
   7   1 -16  524.48   28.01
  -7   1  16  528.85   29.44
  -7   1  16  457.66   27.52
   7  -1 -16  450.40   24.53
  -7  -1  16  466.63   27.59
  -7  -1  16  482.71   30.39
  -7   1  15  275.80   15.98
  -7   1  15  254.18   14.10
   7   1 -15  222.14   12.88
   7   1 -15  264.42   13.61
  -7   1  15  278.35   14.95
   7  -1 -15  252.49   11.23
   7  -1 -15  252.65   15.04
  -7  -1  15  258.19   19.67
  -7  -1  15  250.22   11.60
  -7  -1  15  236.92   13.89
   7  -1 -15  238.34   13.17
   7   1 -14   42.37    5.25
   7   1 -14   49.02    3.10
  -7   1  14   49.58    5.93
  -7   1  14   46.71    2.71
  -7   1  14   44.71    3.69
  -7   1  14   48.89    4.59
   7   1 -14   55.13    3.74
   7  -1 -14   43.79    3.68
   7  -1 -14   46.75    4.33
   7  -1 -14   44.34    2.58
   7  -1 -14   46.46    3.46
  -7  -1  14   45.94    4.04
  -7  -1  14   52.78    4.71
  -7  -1  14   50.85    2.89
   7   1 -13  527.70   23.07
  -7   1  13  527.36   27.87
   7   1 -13  508.15   29.10
  -7   1  13  507.99   28.02
   7   1 -13  417.23   22.50
  -7   1  13  541.60   24.59
   7   1 -13  466.39   24.95
  -7   1  13  533.19   27.23
   7  -1 -13  496.70   22.29
   7  -1 -13  506.25   28.20
   7  -1 -13  509.39   25.84
  -7  -1  13  539.43   25.34
   7  -1 -13  482.84   22.22
  -7  -1  13  515.11   29.40
  -7  -1  13  513.28   23.86
  -7  -1  13  444.63   24.70
   7   1 -12   37.55    2.00
  -7   1  12   39.40    3.59
   7   1 -12   35.27    2.90
   7   1 -12   38.66    4.53
  -7   1  12   40.70    3.34
   7   1 -12   38.76    3.48
  -7   1  12   38.46    2.77
  -7   1  12   37.95    3.55
   7  -1 -12   38.23    2.23
  -7  -1  12   39.57    4.93
   7  -1 -12   42.00    3.76
   7  -1 -12   39.13    2.89
   7  -1 -12   37.56    3.06
  -7  -1  12   37.40    2.29
  -7  -1  12   41.19    3.90
  -7  -1  12   38.53    2.17
   7   1 -11   21.23    2.00
   7   1 -11   22.11    1.48
   7   1 -11   20.12    1.63
   7   1 -11   22.14    3.72
  -7   1  11   19.66    1.88
  -7   1  11   19.15    2.61
  -7   1  11   20.47    2.75
  -7   1  11   22.19    1.71
   7  -1 -11   24.01    1.39
   7  -1 -11   20.54    0.91
   7  -1 -11   24.13    2.20
   7  -1 -11   20.14    1.66
  -7  -1  11   20.00    2.33
  -7  -1  11   22.80    1.65
  -7  -1  11   17.80    2.83
   7  -1 -11   21.61    2.75
  -7  -1  11   17.28    3.57
   7   1 -10  153.48    6.81
  -7   1  10  176.26    7.31
   7   1 -10  176.71    6.78
  -7   1  10  169.63    6.83
  -7   1  10  161.30    7.67
   7   1 -10  195.99   11.30
   7   1 -10  174.10    6.74
  -7   1  10  165.56    8.73
   7  -1 -10  173.37    5.83
   7  -1 -10  171.70    8.91
   7  -1 -10  143.16    6.08
   7  -1 -10  187.67    5.86
  -7  -1  10  180.38    7.16
  -7  -1  10  178.15    9.09
   7  -1 -10  163.95    5.85
  -7  -1  10  162.51    7.48
  -7  -1  10  182.11    6.95
   7  -1 -10  168.22    7.43
  -7   1   9   13.68    1.09
  -7   1   9   12.88    1.46
  -7   1   9   14.22    1.90
   7   1  -9   12.16    1.08
   7   1  -9   13.01    1.79
  -7   1   9   13.80    1.25
   7   1  -9   14.20    1.08
  -7   1   9   14.72    0.80
   7  -1  -9   15.69    0.83
  -7  -1   9   13.54    1.64
   7  -1  -9   14.82    0.74
   7  -1  -9   13.65    1.92
   7  -1  -9   13.05    1.35
   7  -1  -9   13.60    1.12
  -7  -1   9   13.81    1.95
  -7  -1   9   13.83    2.15
  -7  -1   9   13.31    1.86
   7   1  -8   52.71    2.36
  -7   1   8   50.11    2.59
   7   1  -8   54.96    3.35
  -7   1   8   52.35    2.70
   7   1  -8   43.34    2.93
   7   1  -8   59.54    2.18
  -7   1   8   54.60    2.10
  -7   1   8   56.28    3.62
  -7   1   8   51.94    2.55
   7  -1  -8   56.17    2.52
   7  -1  -8   55.81    3.51
   7  -1  -8   51.04    3.45
  -7  -1   8   58.54    3.43
   7  -1  -8   52.92    1.89
   7  -1  -8   44.25    2.19
  -7  -1   8   57.06    3.11
  -7  -1   8   49.95    2.65
  -7  -1   8   52.26    2.61
   7   1  -7 8738.31  912.45
  -7   1   7 8938.48  936.61
  -7   1   7 8653.41  862.13
   7   1  -7 6506.69  673.54
   7   1  -7 8431.39  843.51
   7   1  -7 7895.13  808.54
  -7   1   7 7300.46  749.62
  -7   1   7 8126.73  839.63
  -7   1   7 9490.73  963.32
   7  -1  -7 8692.94  862.16
  -7  -1   7 6907.89  720.64
   7  -1  -7 6568.12  682.07
  -7  -1   7 7926.30  813.26
  -7  -1   7 7157.74  699.38
  -7  -1   7 8450.67  828.33
  -7  -1   7 8334.22  843.54
  -7  -1   7 8922.47  928.16
   7  -1  -7 8216.45  836.12
   7  -1  -7 8476.70  854.31
   7  -1  -7 9016.77  942.42
   7   1  -6 2095.89  121.76
   7   1  -6 2009.48  129.03
   7   1  -6 1700.28  103.57
   7   1  -6 2136.03  136.42
  -7   1   6 2024.48  125.59
  -7   1   6 2029.43  122.93
  -7   1   6 1963.13  136.70
  -7   1   6 2118.05  120.05
  -7   1   6 2168.23  133.61
   7  -1  -6 2078.97  125.72
  -7  -1   6 2107.33  126.54
  -7  -1   6 2177.81  138.23
  -7  -1   6 2101.41  125.02
  -7  -1   6 1865.69  117.98
  -7  -1   6 2158.06  125.53
   7  -1  -6 2044.36  117.47
   7  -1  -6 2056.81  123.92
   7  -1  -6 1931.44  124.72
  -7  -1   6 1968.08  112.33
   7  -1  -6 2075.95  135.06
  -7   1   5 3797.80  290.29
  -7   1   5 3572.41  251.25
   7   1  -5 3977.44  317.61
   7   1  -5 3600.95  275.39
  -7   1   5 3877.40  303.41
   7   1  -5 3502.90  255.80
  -7   1   5 3589.94  273.80
  -7   1   5 3541.20  263.02
   7  -1  -5 4205.36  324.84
   7  -1  -5 3771.90  279.33
  -7  -1   5 3899.49  288.30
  -7  -1   5 3531.79  257.50
   7  -1  -5 3574.49  259.52
  -7  -1   5 3567.93  265.63
  -7  -1   5 3611.80  267.50
   7  -1  -5 3407.18  261.27
   7  -1  -5 3774.26  285.08
  -7  -1   5 3915.01  298.57
  -7  -1   5 3579.04  284.00
   7   1  -4  896.02   47.86
   7   1  -4  977.17   49.05
   7   1  -4  999.65   48.13
   7   1  -4 1052.30   46.53
   7   1  -4  940.98   47.99
   7   1  -4  898.34   39.57
  -7   1   4  960.27   49.95
  -7   1   4  993.36   49.51
  -7   1   4  959.83   51.21
  -7   1   4 1031.65   47.52
   7  -1  -4 1007.30   51.99
   7  -1  -4 1096.14   50.98
  -7  -1   4  959.52   48.67
   7  -1  -4 1010.16   43.14
  -7  -1   4  891.66   45.27
  -7  -1   4  940.00   44.45
   7  -1  -4  973.84   48.79
   7  -1  -4 1057.08   52.90
  -7  -1   4  901.59   43.20
   7  -1  -4 1024.57   44.05
   7   1  -3 3095.48  204.79
   7   1  -3 3192.72  226.01
  -7   1   3 3162.91  217.90
   7   1  -3 3320.60  236.69
  -7   1   3 3364.63  244.67
   7   1  -3 2834.75  204.22
  -7   1   3 3354.19  242.22
  -7   1   3 3072.58  217.77
   7   1  -3 2857.16  203.40
   7  -1  -3 3293.46  235.48
  -7  -1   3 3056.97  218.43
   7  -1  -3 3795.04  264.82
  -7  -1   3 3216.45  225.70
   7  -1  -3 3104.89  220.21
  -7  -1   3 3613.09  251.78
   7  -1  -3 2850.87  195.71
  -7  -1   3 3094.91  215.96
   7  -1  -3 3415.72  244.48
   7   1  -2  680.51   35.89
   7   1  -2  787.06   30.43
   7   1  -2  679.51   36.42
   7   1  -2  712.12   32.68
  -7   1   2  731.66   34.39
  -7   1   2  719.97   31.58
  -7   1   2  797.06   37.15
  -7   1   2  685.47   34.93
  -7   1   2  701.74   35.13
   7  -1  -2  763.27   33.95
   7  -1  -2  731.04   38.05
   7  -1  -2  686.77   28.80
   7  -1  -2  707.49   34.30
  -7  -1   2  636.28   30.39
  -7  -1   2  788.48   39.20
  -7  -1   2  721.96   33.53
  -7  -1   2  736.06   37.50
  -7  -1   2  773.98   30.60
  -7   1   1  270.52   11.45
   7   1  -1  331.29   14.30
   7   1  -1  271.68   13.28
   7   1  -1  340.90   11.46
   7   1  -1  293.58   12.31
  -7   1   1  293.95   14.88
   7   1  -1  326.40   13.25
  -7   1   1  285.89   12.88
  -7   1   1  280.91   11.74
   7  -1  -1  289.48   11.51
   7  -1  -1  318.41   13.75
  -7  -1   1  321.36   14.33
   7  -1  -1  265.95   13.67
  -7  -1   1  342.27   11.60
  -7  -1   1  291.74   13.61
  -7  -1   1  307.61   14.75
   7  -1  -1  290.93   13.98
  -7  -1   1  333.58   13.12
  -7   1   0 1944.15  114.34
   7   1   0 1855.70  106.37
   7   1   0 1842.58  111.42
  -7   1   0 1986.21  117.11
  -7   1   0 1930.47  121.19
   7   1   0 1723.73  103.63
   7   1   0 1803.15  110.72
  -7   1   0 1846.69  110.26
   7   1   0 1821.96  113.00
   7  -1   0 2015.14  120.67
  -7  -1   0 1810.95  105.20
  -7  -1   0 1521.80   96.89
  -7  -1   0 1834.73  105.48
  -7  -1   0 1868.18  117.82
   7  -1   0 1939.81  114.99
   7  -1   0 1933.39  118.76
   7  -1   0 1990.59  112.26
  -7  -1   0 1733.78  107.74
   7   1   111837.89 1493.37
  -7   1  -112983.00 1611.84
   7   1   113488.61 1660.01
   7   1   113016.52 1613.45
   7   1   111948.18 1483.29
   7   1   112675.49 1547.30
  -7   1  -110861.64 1355.60
  -7   1  -113009.68 1639.64
  -7   1  -114352.40 1779.99
   7  -1   112998.30 1623.23
  -7  -1  -113682.03 1703.02
   7  -1   114276.08 1725.40
   7  -1   112541.05 1562.27
   7  -1   112094.73 1509.46
  -7  -1  -113329.46 1681.99
  -7  -1  -112274.41 1515.64
  -7  -1  -112778.68 1557.44
  -7  -1  -112721.97 1607.19
   7  -1   113088.36 1637.26
   7   1   2 1377.98   77.05
   7   1   2 1488.76   88.51
   7   1   2 1623.30   88.64
  -7   1  -2 1375.46   78.88
  -7   1  -2 1573.46   91.86
  -7   1  -2 1695.21   92.79
   7   1   2 1409.00   73.42
  -7   1  -2 1381.48   80.88
   7  -1   2 1484.46   84.43
  -7  -1  -2 1357.41   77.11
   7  -1   2 1345.41   76.88
  -7  -1  -2 1312.72   77.26
  -7  -1  -2 1420.13   81.24
  -7  -1  -2 1469.44   87.08
  -7  -1  -2 1451.91   82.12
   7  -1   2 1540.81   76.54
   7  -1   2 1445.08   85.21
  -7  -1  -2 1627.36   82.52
   7  -1   2 1505.44   76.60
  -7   1  -3  874.44   40.94
   7   1   3  748.19   36.75
   7   1   3  747.97   38.44
   7   1   3  797.26   39.29
  -7   1  -3  743.85   38.32
  -7   1  -3  872.22   42.21
  -7   1  -3  847.82   42.49
   7  -1   3  776.19   38.84
   7  -1   3  803.54   31.52
   7  -1   3  930.54   35.92
  -7  -1  -3  862.63   44.85
   7  -1   3  890.63   45.50
  -7  -1  -3  867.27   35.92
  -7  -1  -3  810.52   40.72
  -7  -1  -3  803.43   44.78
  -7  -1  -3  779.54   38.19
   7  -1   3  800.03   40.30
  -7  -1  -3  761.72   37.49
   7   1   4  166.74    7.43
   7   1   4  188.43    8.34
  -7   1  -4  177.08    8.08
  -7   1  -4  194.09    7.76
   7   1   4  181.17    8.12
  -7   1  -4  172.23    7.99
  -7   1  -4  181.19    8.38
  -7  -1  -4  204.05    9.75
  -7  -1  -4  178.76    8.26
   7  -1   4  195.12    9.06
   7  -1   4  193.70    8.54
  -7  -1  -4  155.43    7.27
   7  -1   4  169.77    9.50
  -7  -1  -4  211.72    6.00
  -7  -1  -4  222.15   10.47
  -7  -1  -4  174.21   11.06
   7   1   5  132.59    6.73
   7   1   5  151.36    7.18
   7   1   5  152.39    7.69
  -7   1  -5  158.77    7.52
  -7   1  -5  169.05    7.14
  -7   1  -5  161.52   10.30
  -7   1  -5  161.08    7.38
   7  -1   5  166.60    7.07
  -7  -1  -5  137.00    6.90
   7  -1   5  159.43   11.02
   7  -1   5  153.21   10.28
  -7  -1  -5  162.18    9.03
  -7  -1  -5  153.44    7.17
  -7  -1  -5  163.92    9.31
   7   1   6  386.21   20.45
  -7   1  -6  490.42   24.26
   7   1   6  476.18   24.08
   7   1   6  413.20   20.55
  -7   1  -6  421.33   20.89
  -7   1  -6  500.81   23.93
  -7   1  -6  457.57   21.33
  -7  -1  -6  503.78   26.79
   7  -1   6  490.55   21.89
   7  -1   6  461.45   27.30
   7  -1   6  442.88   23.85
  -7  -1  -6  431.73   21.81
  -7  -1  -6  444.26   21.50
  -7  -1  -6  439.91   21.29
  -7   1  -7  824.32   47.89
   7   1   7 1022.26   63.87
  -7   1  -7 1126.96   63.02
  -7   1  -7  919.27   53.82
   7   1   7  881.70   52.02
  -7   1  -7 1022.95   62.38
   7  -1   7 1056.32   64.68
   7  -1   7 1028.59   54.08
  -7  -1  -7  955.63   52.61
  -7  -1  -7  973.12   55.28
  -7  -1  -7  932.27   57.59
  -7  -1  -7  973.30   54.11
   7  -1   7  926.89   57.22
  -7   1  -8  420.05   21.47
   7   1   8  355.57   20.37
  -7   1  -8  416.61   20.06
  -7   1  -8  432.14   22.25
   7   1   8  399.32   21.86
  -7   1  -8  345.48   17.97
   7  -1   8  422.20   22.12
   7  -1   8  370.85   17.27
  -7  -1  -8  377.35   19.38
  -7  -1  -8  417.04   23.60
  -7  -1  -8  423.94   24.47
   7  -1   8  380.27   26.74
  -7  -1  -8  382.71   18.48
   7   1   9    5.57    1.72
   7   1   9    2.64    1.64
  -7   1  -9    5.56    1.68
  -7   1  -9    6.34    1.57
  -7   1  -9    2.71    1.28
  -7   1  -9    4.78    1.24
  -7  -1  -9    4.25    1.20
   7  -1   9    5.12    1.71
   7  -1   9    3.80    2.04
   7  -1   9    4.71    1.62
  -7  -1  -9    4.73    1.51
  -7  -1  -9    3.87    1.33
  -7  -1  -9    4.57    2.92
  -7   1 -10    0.76    1.70
  -7   1 -10    1.41    1.10
   7   1  10   -0.18    1.11
   7   1  10    0.98    1.19
  -7   1 -10    1.00    0.80
   7  -1  10    0.83    1.33
  -7  -1 -10    0.20    0.74
  -7  -1 -10    0.61    1.16
   7  -1  10    0.12    1.13
  -7  -1 -10    0.28    1.05
  -7  -1 -10   -1.00    1.37
  -7   1 -11   21.20    3.75
   7   1  11   16.93    3.58
   7   1  11   24.36    3.56
   7  -1  11   23.97    4.08
  -7  -1 -11   22.61    3.58
   7  -1  11   26.79    5.39
   7   1  12   27.28    6.79
   7   1  12   38.71    6.93
   7  -1  12   38.91    4.55
   7  -1  12   29.79    5.30
  -7  -1 -12   29.12    4.44
   7   1  13  111.97   10.94
   7   1  13  141.88   10.85
   7  -1  13  132.86   17.56
   7  -1  13  147.08   10.88
  -7  -1 -13  146.78   11.49
   7   1  14    5.71    2.17
   7   1  14    4.07    2.18
   7  -1  14    3.21    2.19
   7  -1  14   -0.75    2.61
  -7  -1 -14    1.10    1.89
   7   1  15   25.43    4.74
   7   1  15   25.88    4.60
   7  -1  15   20.34    5.02
   7  -1  15   24.04    4.59
  -7  -1 -15   22.58    6.07
   7   1  16   52.90    6.20
   7   1  16   36.76    6.33
   7  -1  16   47.38   10.66
   7  -1  16   48.38    9.29
  -7  -1 -16   42.29    5.37
   7   1  17   48.96    8.38
   7   1  17   26.69    5.62
   7  -1  17   45.54    5.45
   7  -1  17   34.60    6.20
  -7  -1 -17   31.57    4.60
   7   1  18   55.52    8.52
   7   1  18  104.65    8.41
   7  -1  18  100.58    8.74
   7  -1  18   75.60    9.11
  -7  -1 -18   68.35    6.84
   7   1  19    2.26    1.94
   7   1  19    1.76    1.77
   7  -1  19    1.65    2.11
   7  -1  19    1.54    1.98
   7   1  20    4.27    2.11
   7  -1  20    1.82    2.21
   7  -1  20    5.54    2.25
   7   1  21   25.14    3.27
   7  -1  21    7.07    3.23
   7  -1  21   21.82    3.41
  -7   3  26    2.81    1.71
   7   3 -25    0.01    1.06
  -7   3  25   -0.19    1.74
  -7  -3  25    0.61    1.55
   7   3 -24   10.91    2.83
  -7   3  24   12.32    4.46
   7  -3 -24    0.51    2.74
  -7  -3  24   11.84    2.60
   7   3 -23   -0.01    2.99
  -7   3  23   19.15    3.22
   7  -3 -23    0.32    3.13
  -7  -3  23   12.27    2.88
  -7  -3  23   16.19    2.96
  -7   3  22    4.60    2.41
   7  -3 -22    0.68    2.48
  -7  -3  22    2.43    2.22
  -7  -3  22    6.81    2.55
  -7   3  21   11.57    3.41
  -7   3  21   13.43    3.26
  -7  -3  21    8.50    3.60
  -7  -3  21    9.87    4.89
  -7   3  20  114.93    9.97
  -7   3  20  109.16    9.90
  -7  -3  20   93.05    8.82
  -7  -3  20  100.52   10.31
  -7   3  19   31.44    5.23
  -7   3  19   32.13    4.77
  -7  -3  19   24.02    4.54
  -7  -3  19   27.98    5.34
  -7   3  18    2.50    2.98
  -7   3  18   -0.25    2.76
  -7  -3  18    1.34    1.88
  -7  -3  18    0.21    2.52
  -7   3  17   24.27    4.43
  -7   3  17   31.66    4.80
  -7  -3  17   20.26    3.87
  -7  -3  17   22.12    4.69
  -7   3  16  102.15    8.66
  -7   3  16  110.96    9.06
  -7  -3  16   99.37    9.17
  -7  -3  16   90.39    7.56
  -7   3  15  307.41   19.56
  -7   3  15  320.49   19.82
  -7  -3  15  278.60   17.18
  -7  -3  15  310.92   20.68
  -7   3  14  125.93    8.90
  -7   3  14  128.37    9.35
   7  -3 -14  130.62    7.36
  -7  -3  14  134.67   10.10
  -7  -3  14  130.06    8.39
   7   3 -13    9.72    2.18
  -7   3  13    9.27    2.21
   7   3 -13    9.48    1.36
  -7   3  13    9.33    2.49
   7  -3 -13   11.28    1.66
   7  -3 -13   10.09    3.27
  -7  -3  13    8.72    1.59
  -7  -3  13    8.48    2.04
   7  -3 -13   11.24    4.65
  -7  -3  13    8.33    2.66
   7   3 -12    4.98    1.51
   7   3 -12    2.69    0.93
  -7   3  12    2.27    1.64
  -7   3  12    1.56    1.42
   7  -3 -12    1.47    1.08
   7  -3 -12    2.08    1.35
   7  -3 -12    1.47    1.33
   7  -3 -12    1.70    1.85
  -7  -3  12    3.98    1.07
  -7  -3  12    1.26    1.67
  -7  -3  12    1.97    1.29
   7   3 -11  480.95   25.80
  -7   3  11  477.56   24.76
  -7   3  11  486.30   24.70
  -7   3  11  477.65   27.14
   7   3 -11  450.27   25.43
   7  -3 -11  444.74   22.14
  -7  -3  11  431.35   24.87
   7  -3 -11  471.99   28.58
   7  -3 -11  472.95   24.96
  -7  -3  11  511.75   28.55
  -7  -3  11  470.74   24.66
   7   3 -10  207.23    9.65
[truncated: 996,214 more chars]
